# Supplementary material for: Genetic association and causal inference converge on hyperglycaemia as a modifiable factor to improve lung function
Source: eLife journal article supplement (doi:10.7554/elife.63115), 2021-03-15
Supplement: supp [file elife-63115-supp-v1.zip]

Archive with 9 entries (9 files):
- elife_poa_e63115_Supplementary_File_1.xlsx
- elife_poa_e63115_Supplementary_File_2.xlsx
- elife_poa_e63115_Supplementary_File_3.xlsx
- elife_poa_e63115_Supplementary_File_4.xlsx
- elife_poa_e63115_Transparent_Reporting_File.docx
- elife_poa_e63115_Figure_1_figure_supplement_1.docx
- elife_poa_e63115_Figure_2_figure_supplement_1.docx
- elife_poa_e63115_Figure_3_figure_supplement_1.pdf
- elife_poa_e63115_Figure_3_figure_supplement_2.docx
