# Supplementary material for: Genetic association and causal inference converge on hyperglycaemia as a modifiable factor to improve lung function
Source: eLife journal article supplement (doi:10.7554/elife.63115), 2021-03-15
Supplement: supp [file elife-63115-supp-v1.zip › elife_poa_e63115_Figure_2_figure_supplement_1.docx]

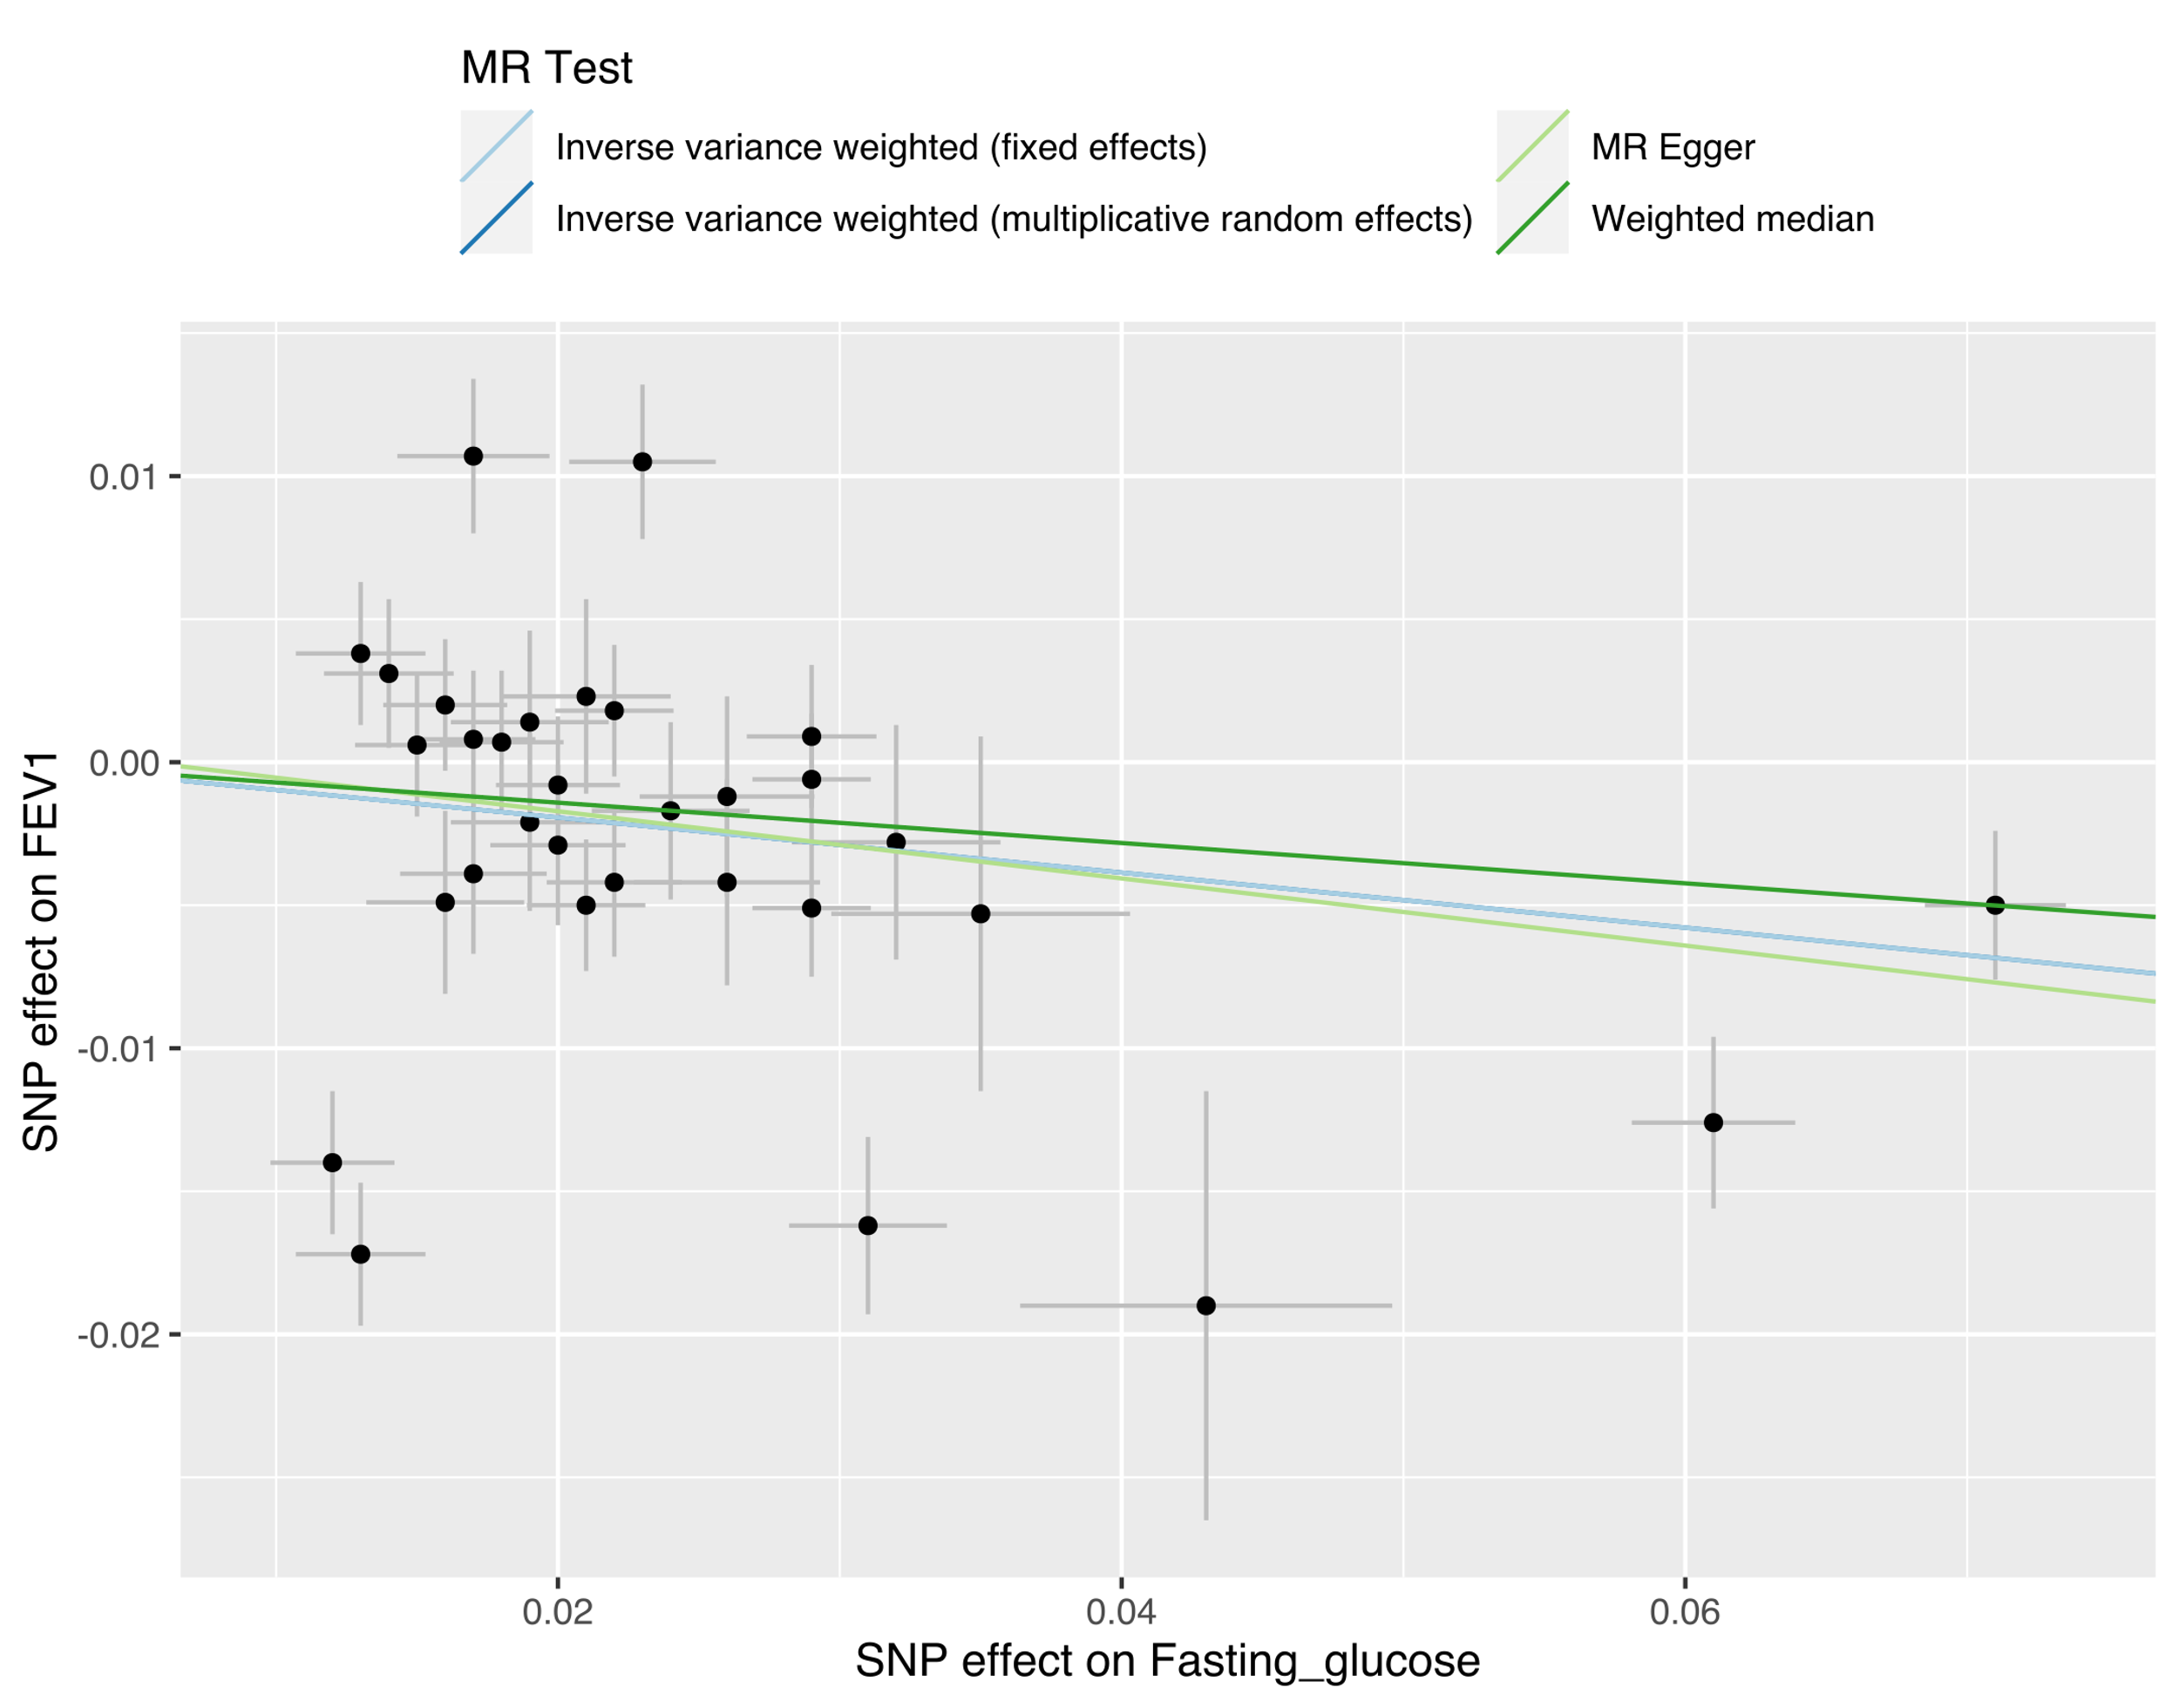

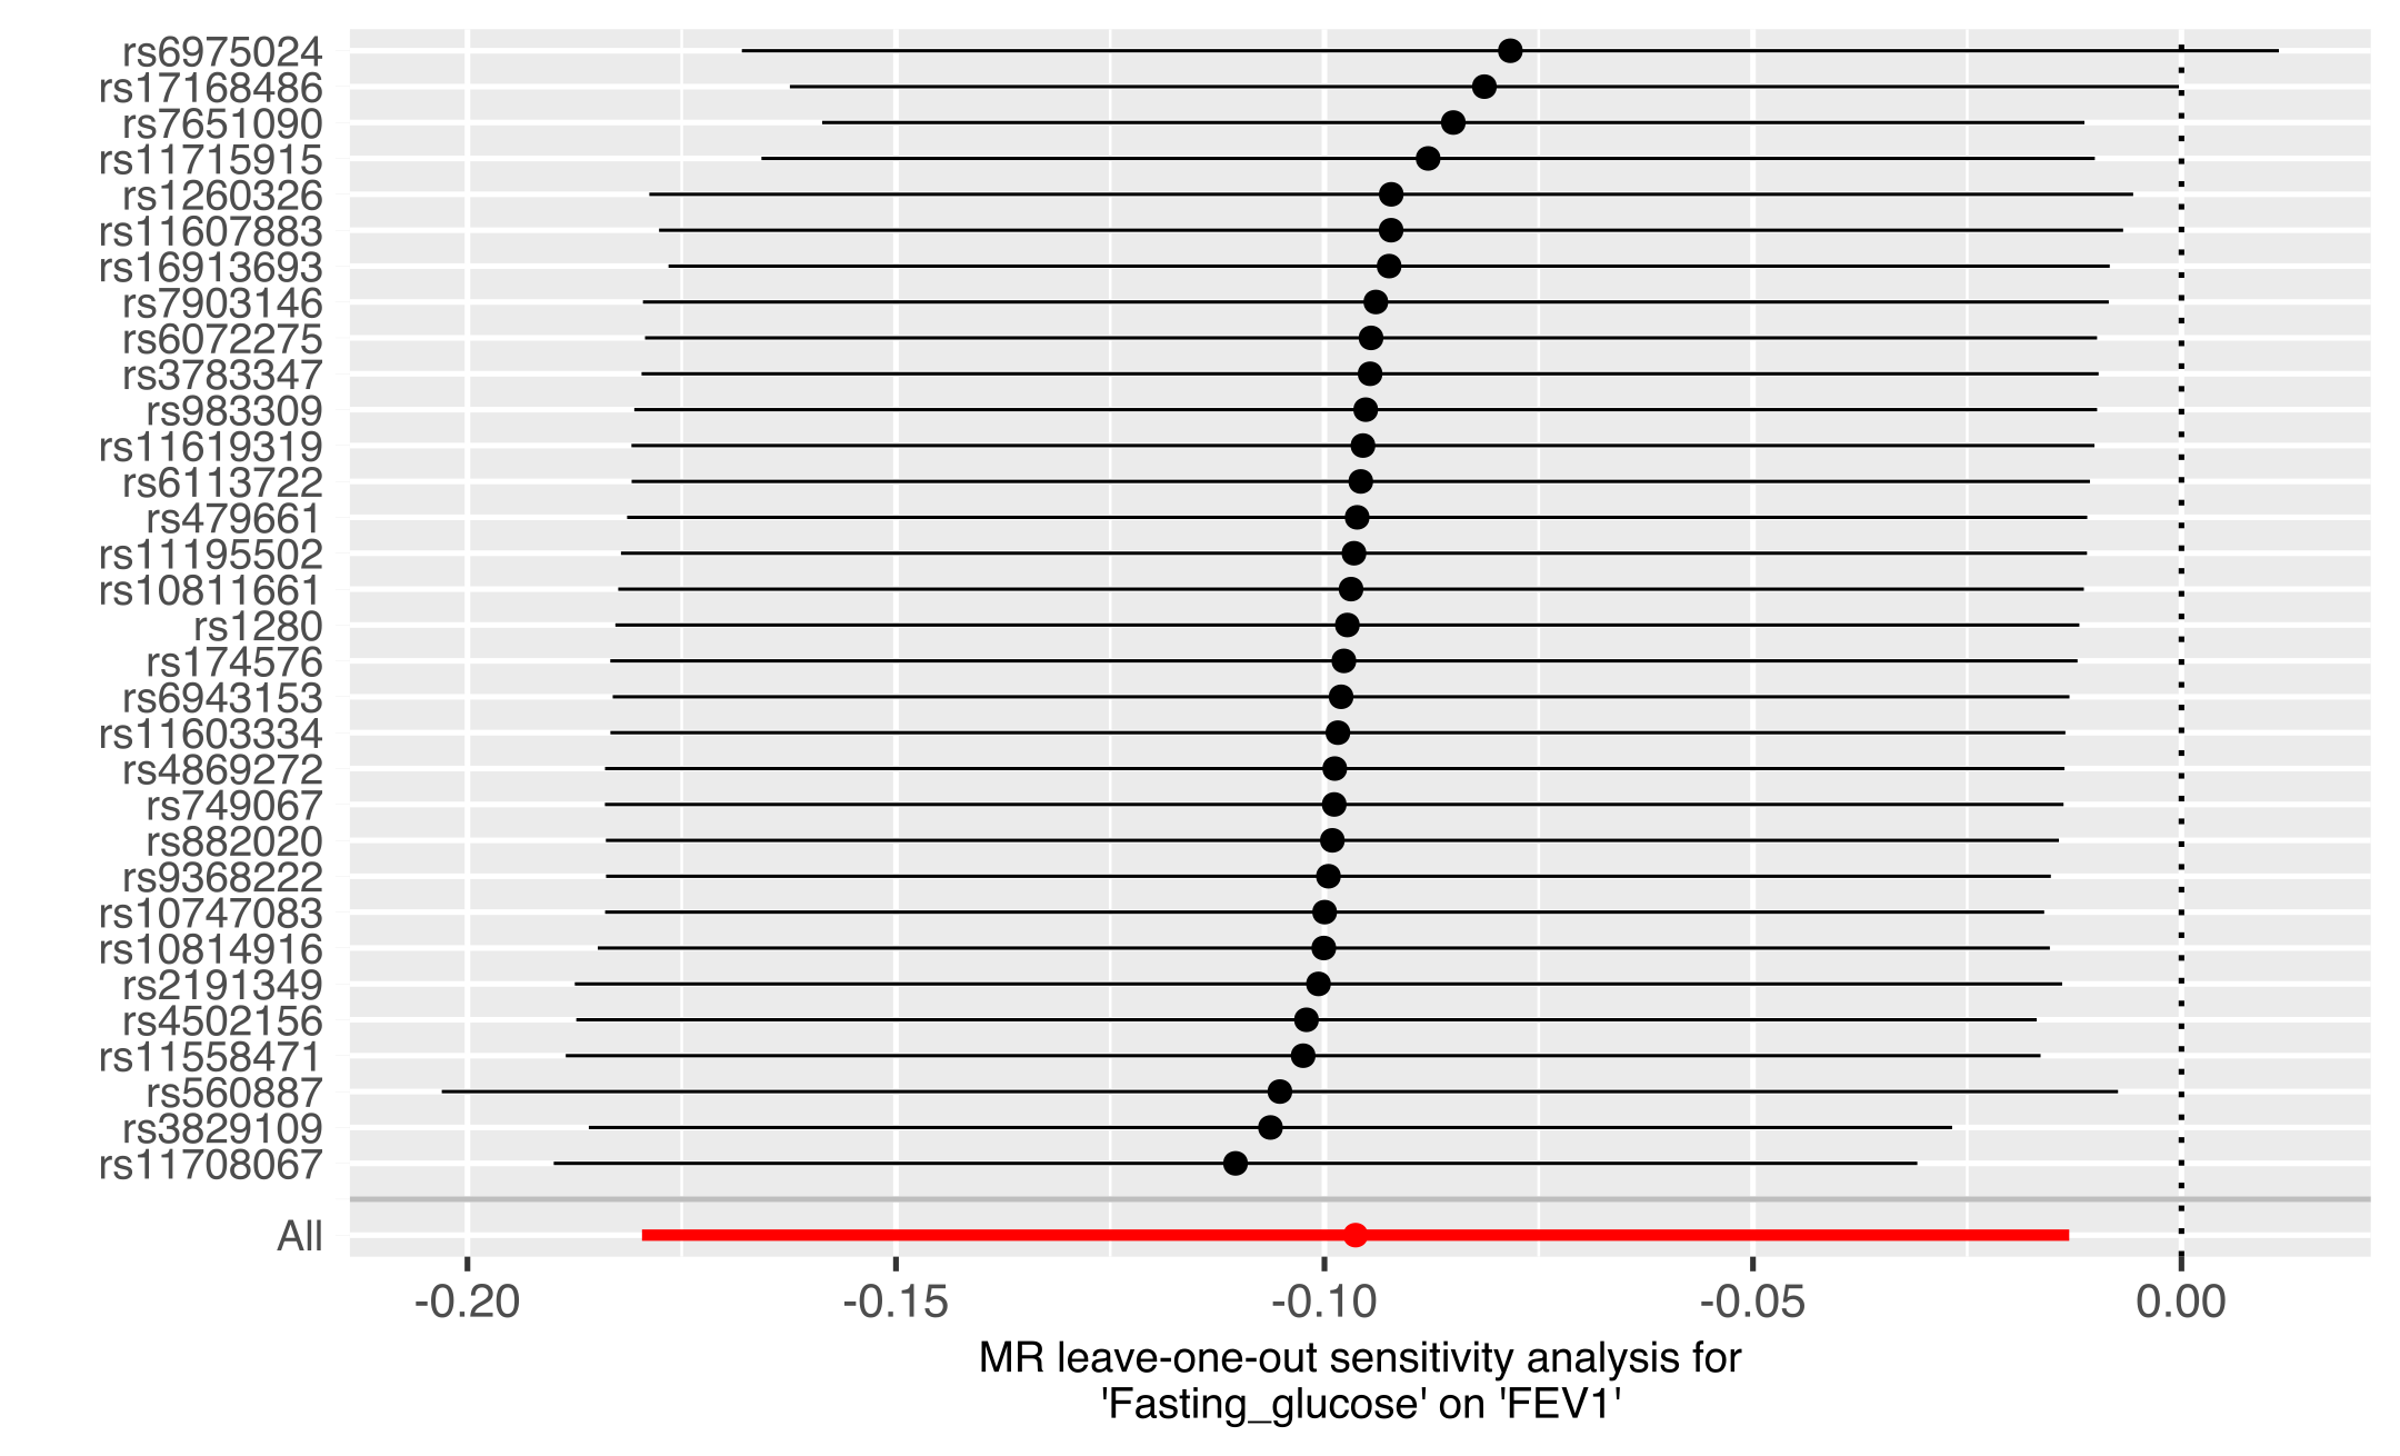

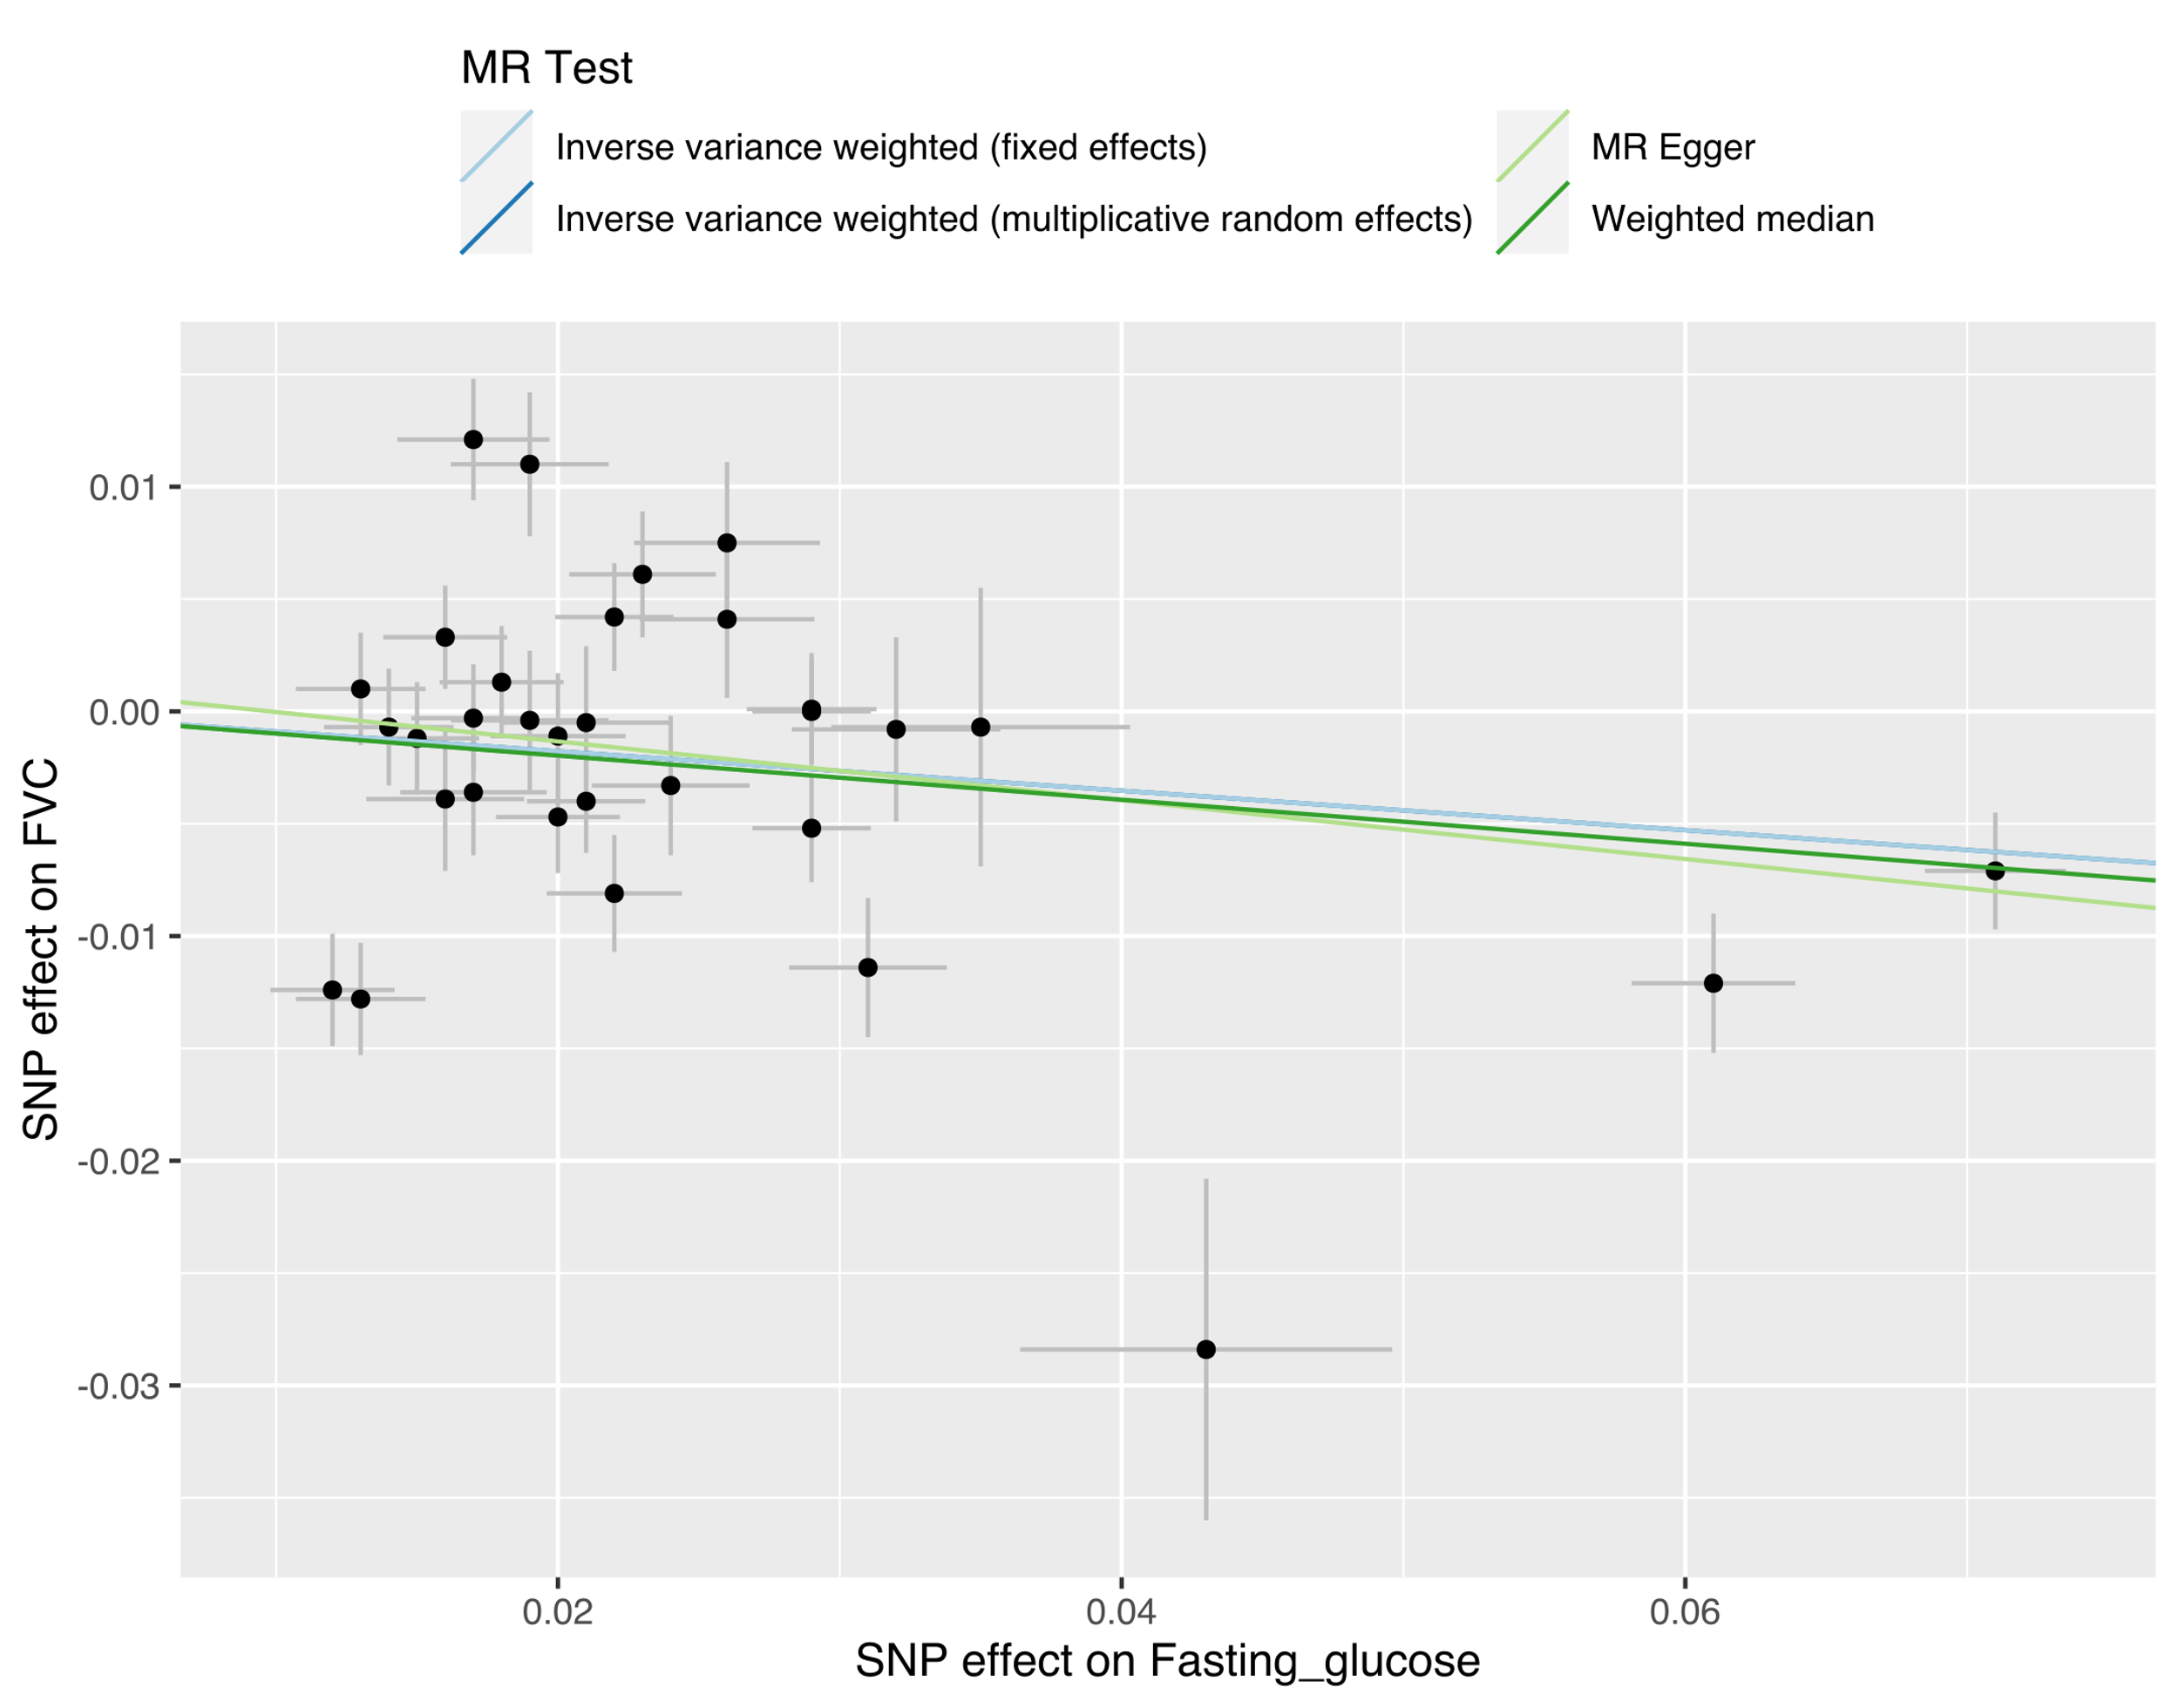

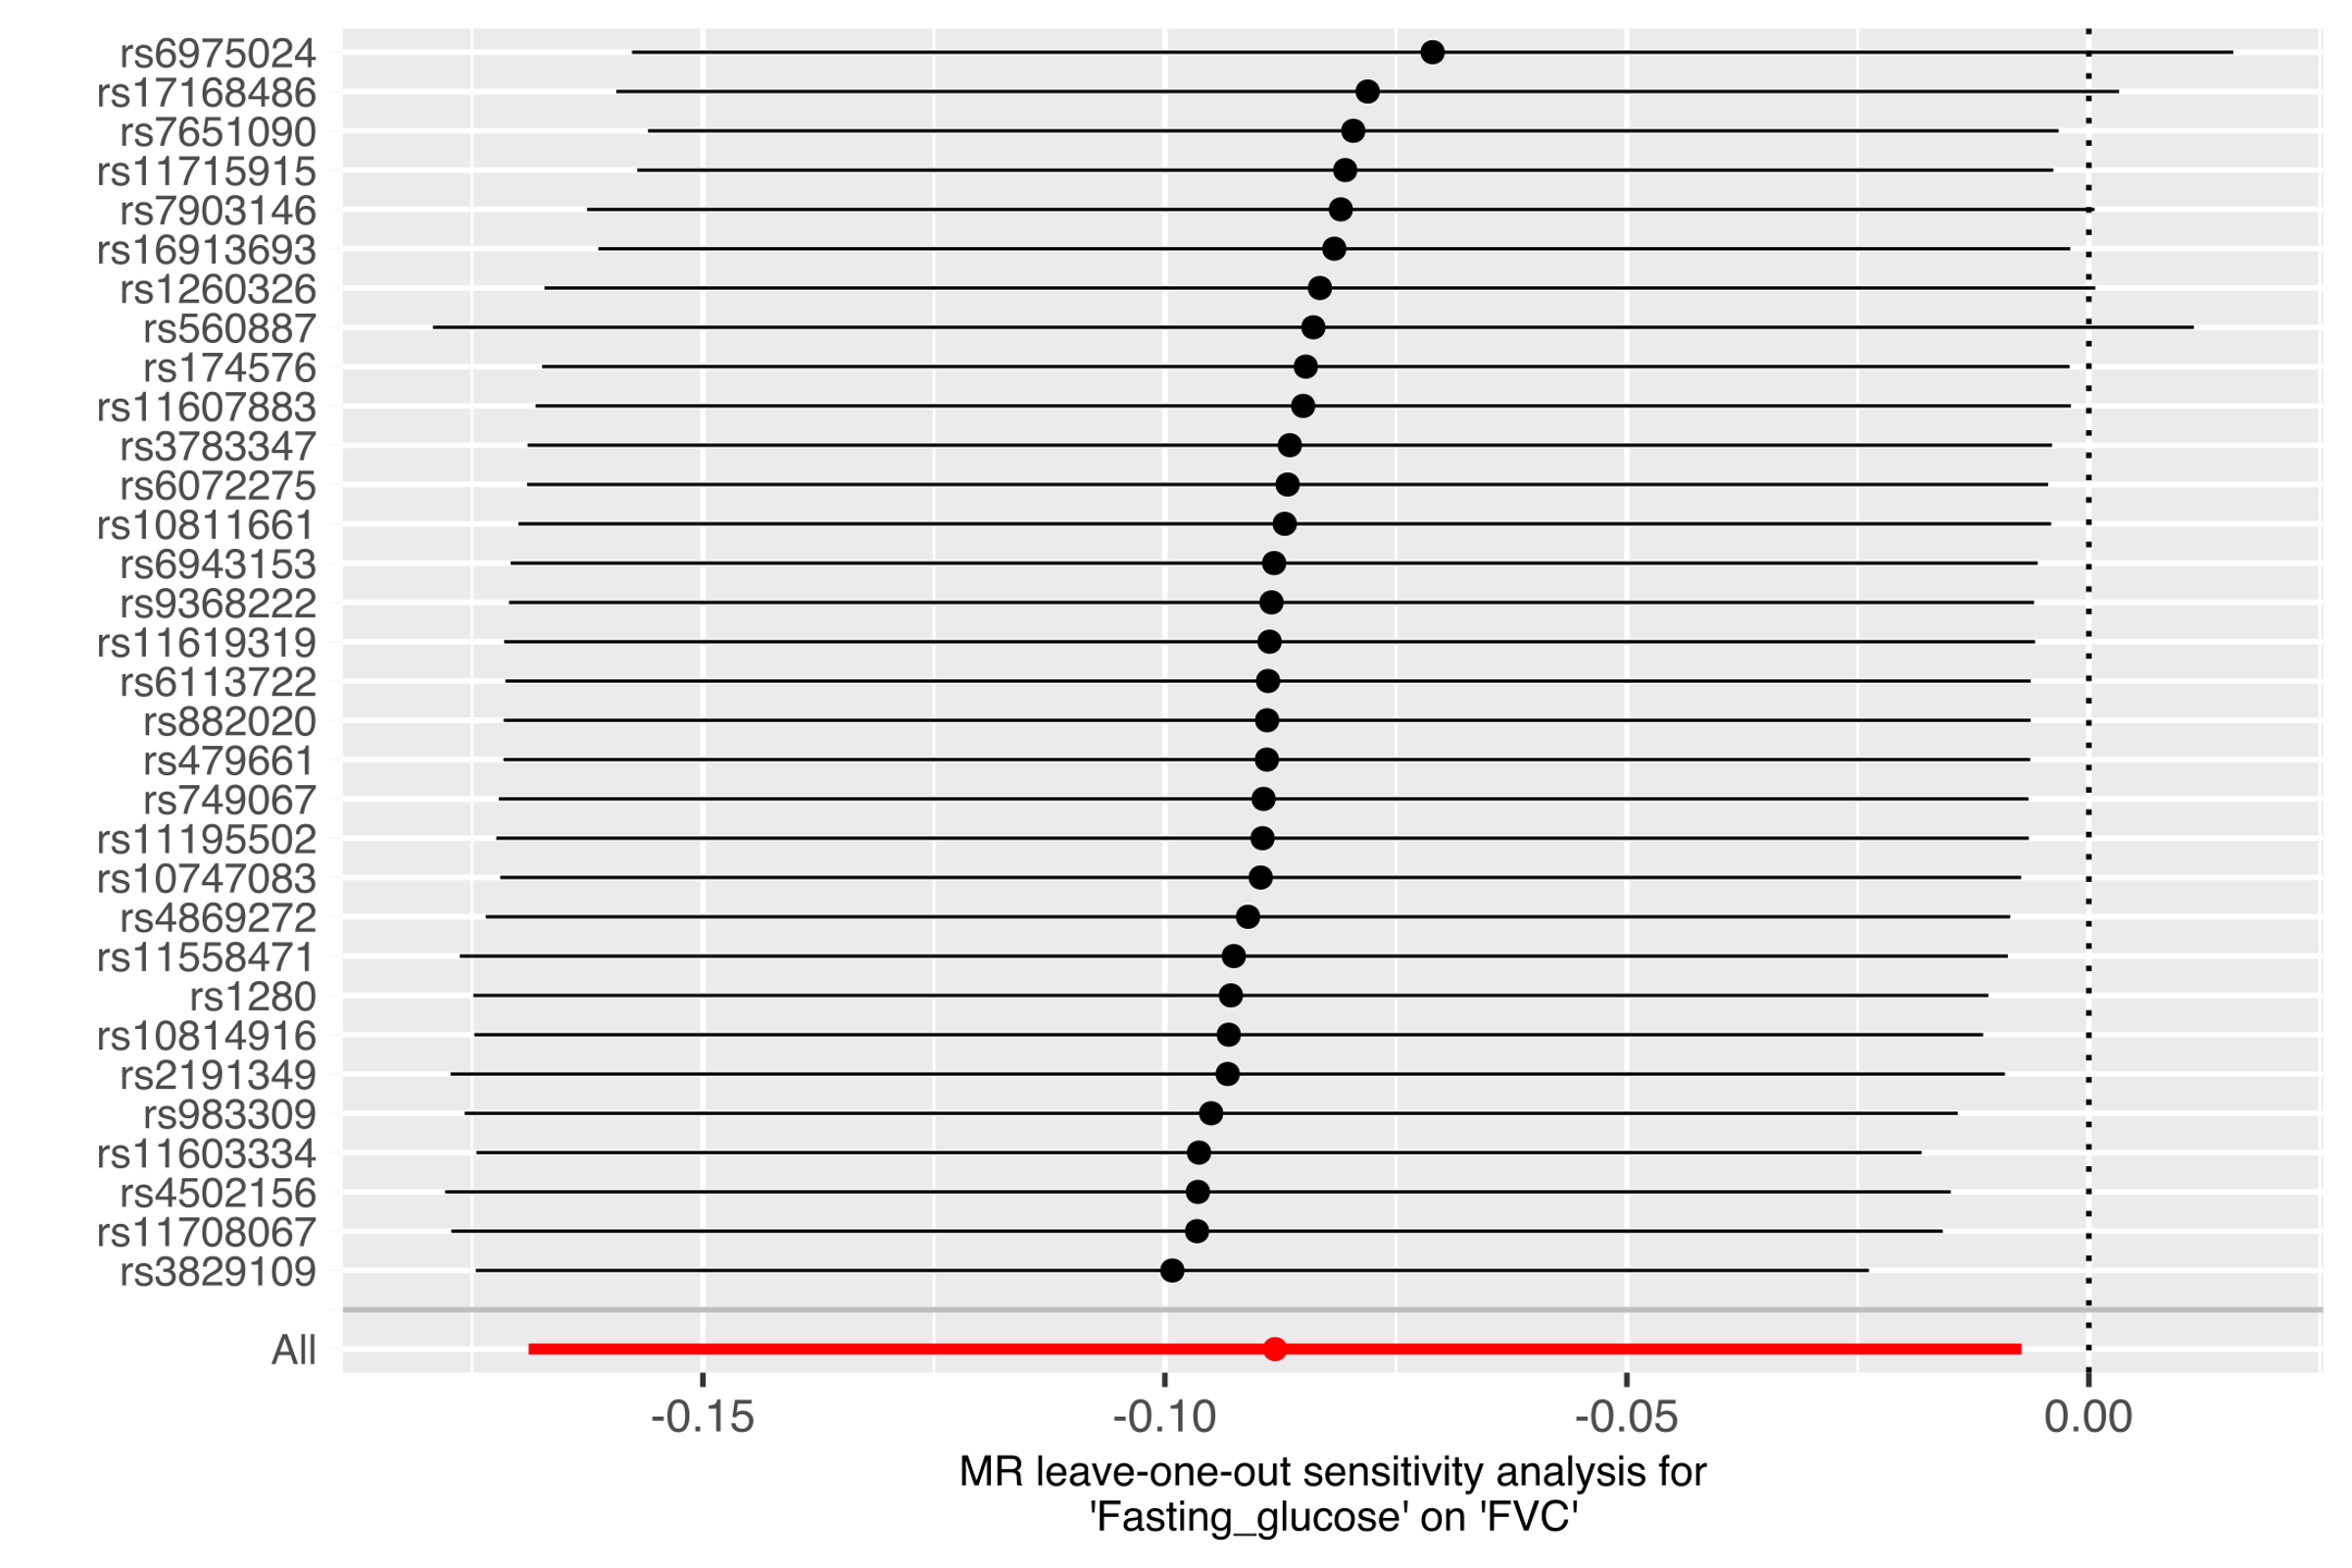


Aa

Ab

**Figure 2 – figure supplement 1. Investigation of the effect of fasting glucose on lung function using two-sample Mendelian randomisation.** Mendelian randomisation (MR) results for (**a**) FEV1 and (**b**) FVC. The left scatter plot indicates the effect size of the instrumental variable (IV) SNP effects on fasting glucose (mmol/L) and FEV1 or FVC, respectively (standard deviation units). Each regression slope corresponds to the causal estimate between fasting glucose and each lung function measure, with the slopes shaded by the MR method used to calculate the causal estimate. The forest plot on the right indicates the results of the ‘leave one out analysis’. Each black point represents the causal estimate (IVW estimator with multiplicative random effects) of fasting glucose on each lung function measure with the SNP (IV) labelled on the y- axis removed; error bars represent upper and lower confidence intervals. The combined IVW estimate with all IVs is represented by the red point (‘All’).
