# Supplementary material for: Genetic association and causal inference converge on hyperglycaemia as a modifiable factor to improve lung function
Source: eLife journal article supplement (doi:10.7554/elife.63115), 2021-03-15
Supplement: supp [file elife-63115-supp-v1.zip › elife_poa_e63115_Figure_3_figure_supplement_1.pdf]

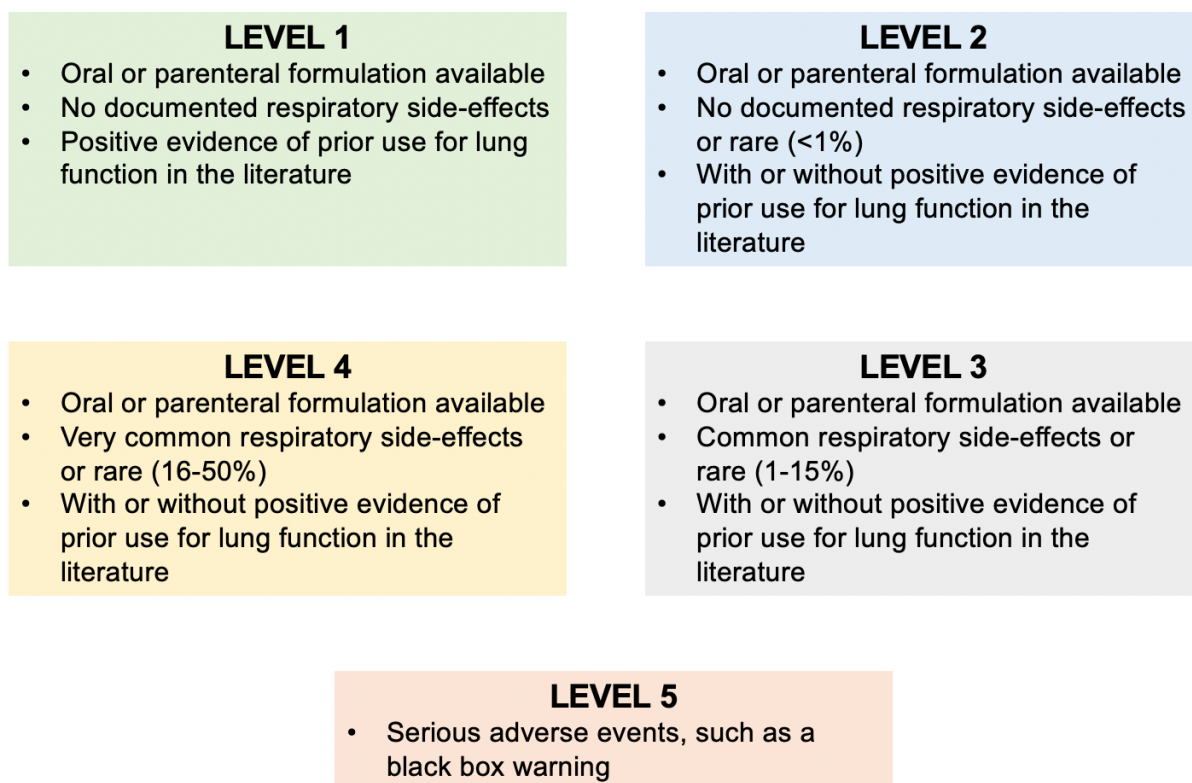

**Figure 3 – figure supplement 1. Schematic for the prioritisation of drug repurposing candidates.** The criteria for each ranking category are detailed in their respective boxes.
