# Supplementary material for: Genetic association and causal inference converge on hyperglycaemia as a modifiable factor to improve lung function
Source: eLife journal article supplement (doi:10.7554/elife.63115), 2021-03-15
Supplement: supp [file elife-63115-supp-v1.zip › elife_poa_e63115_Figure_3_figure_supplement_2.docx]

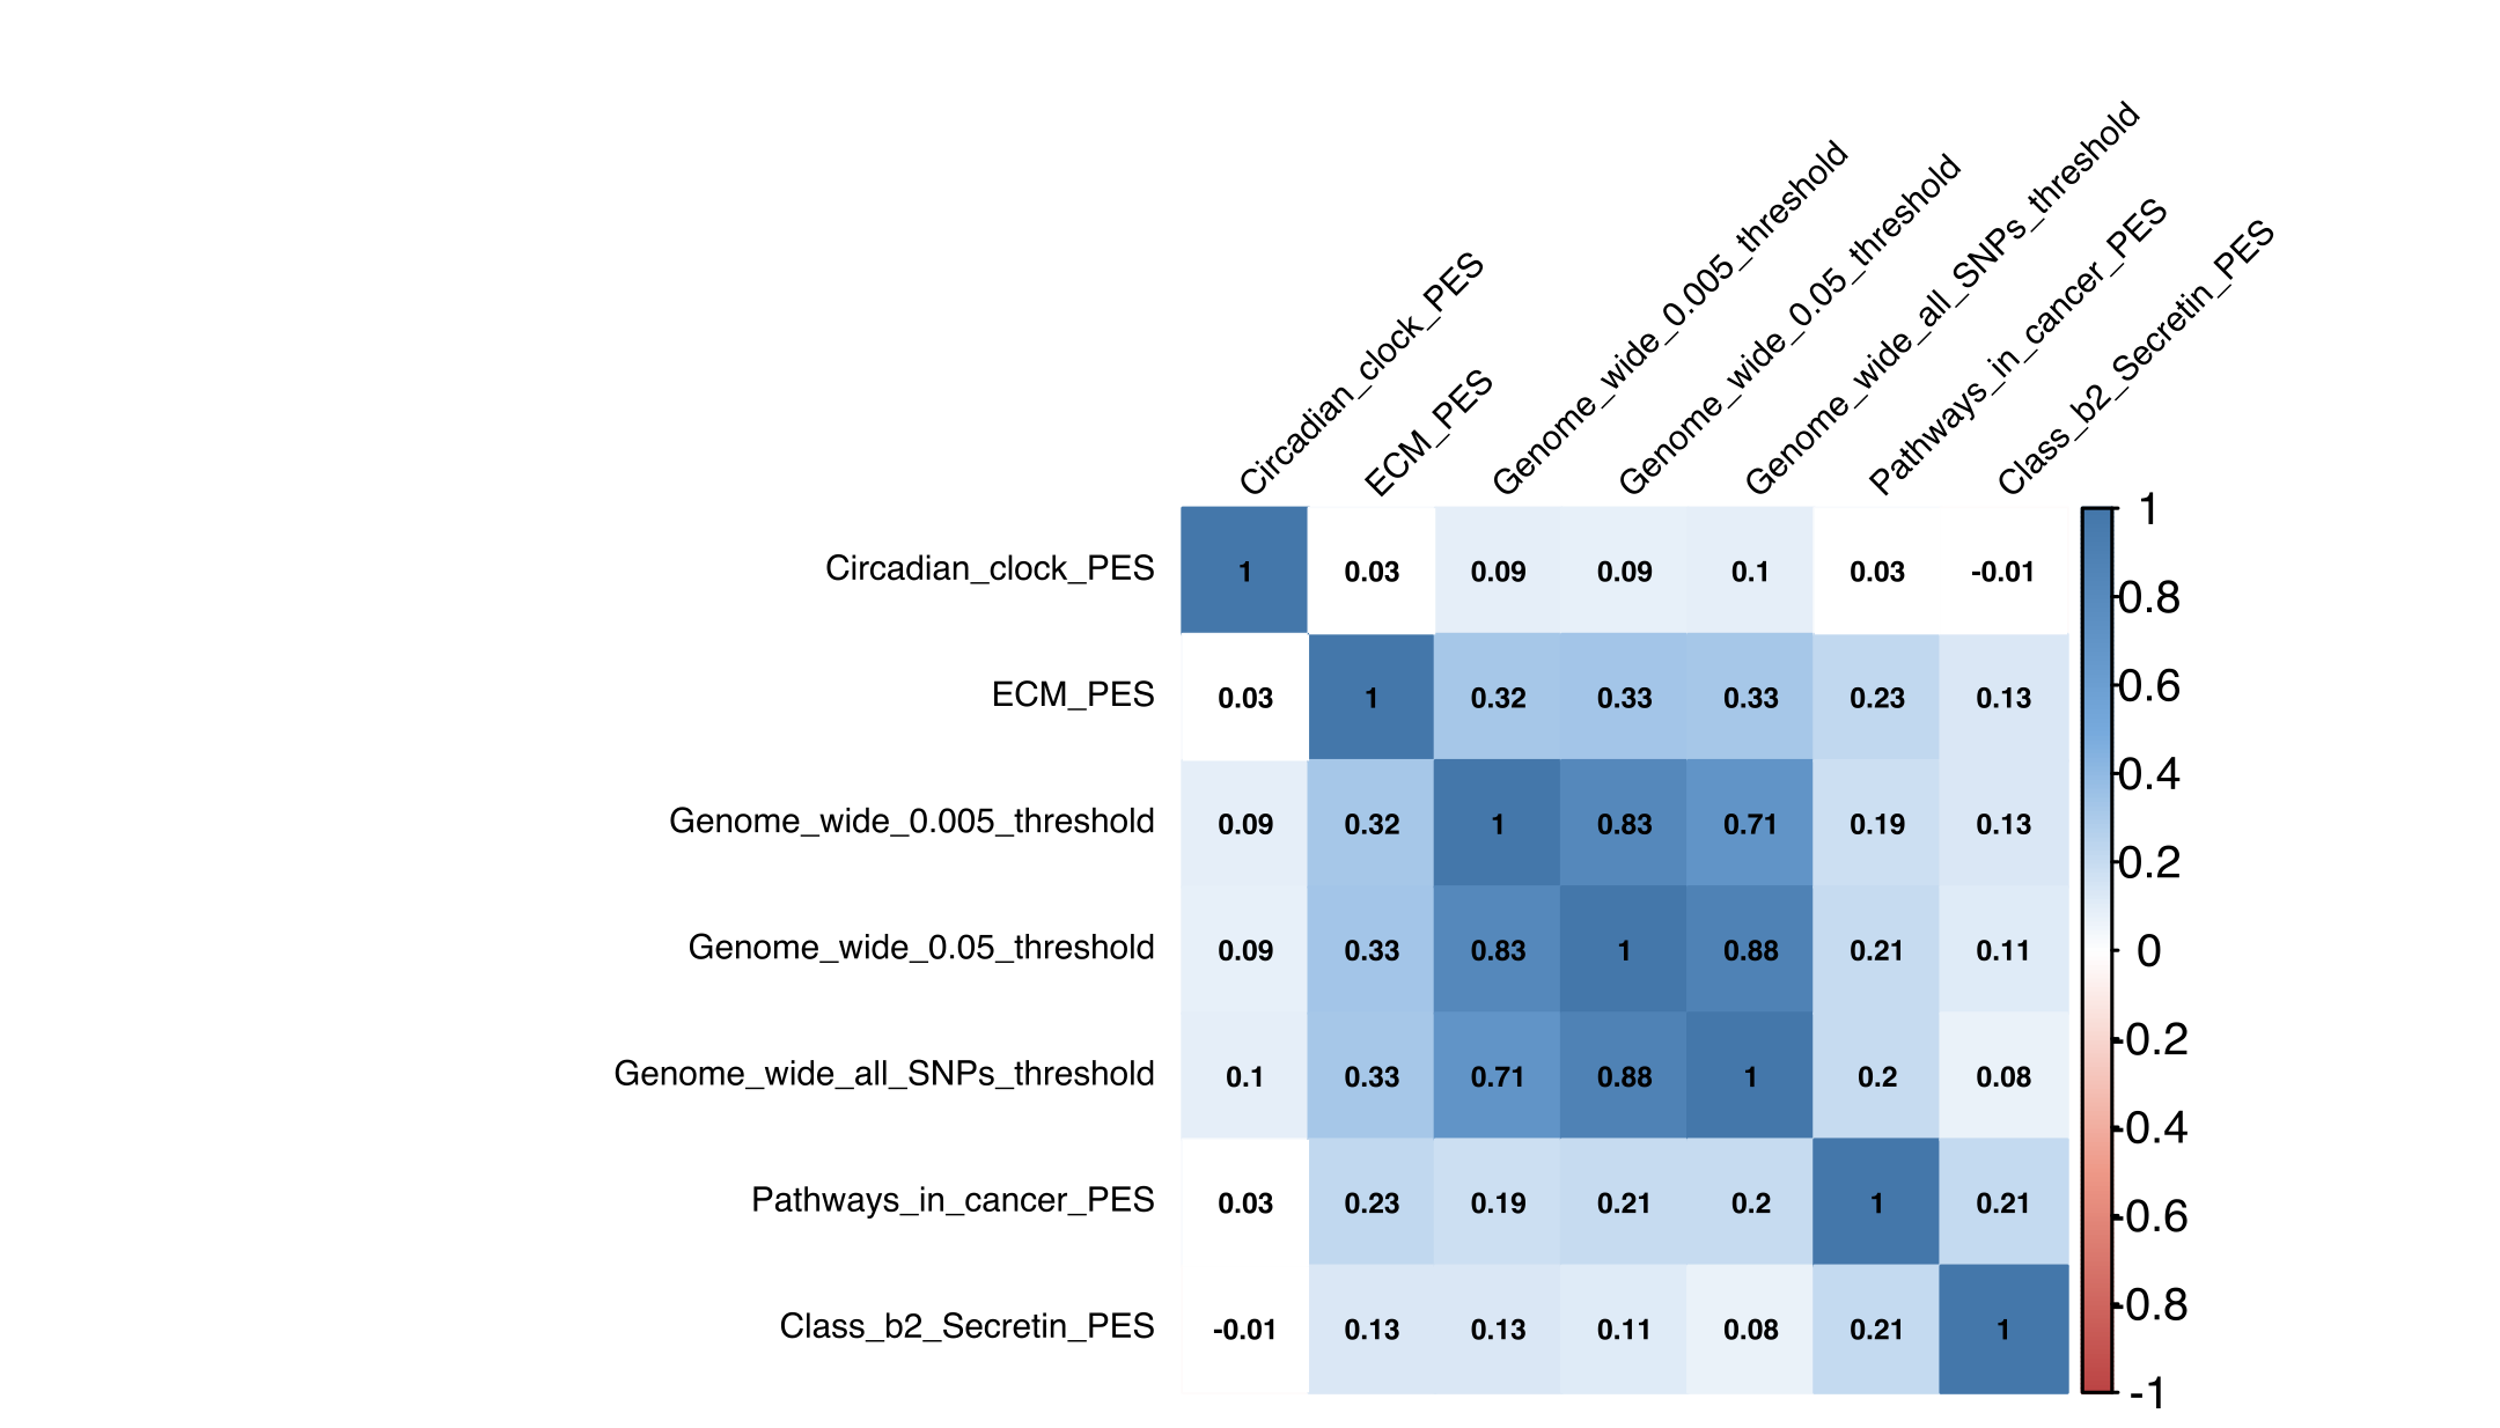

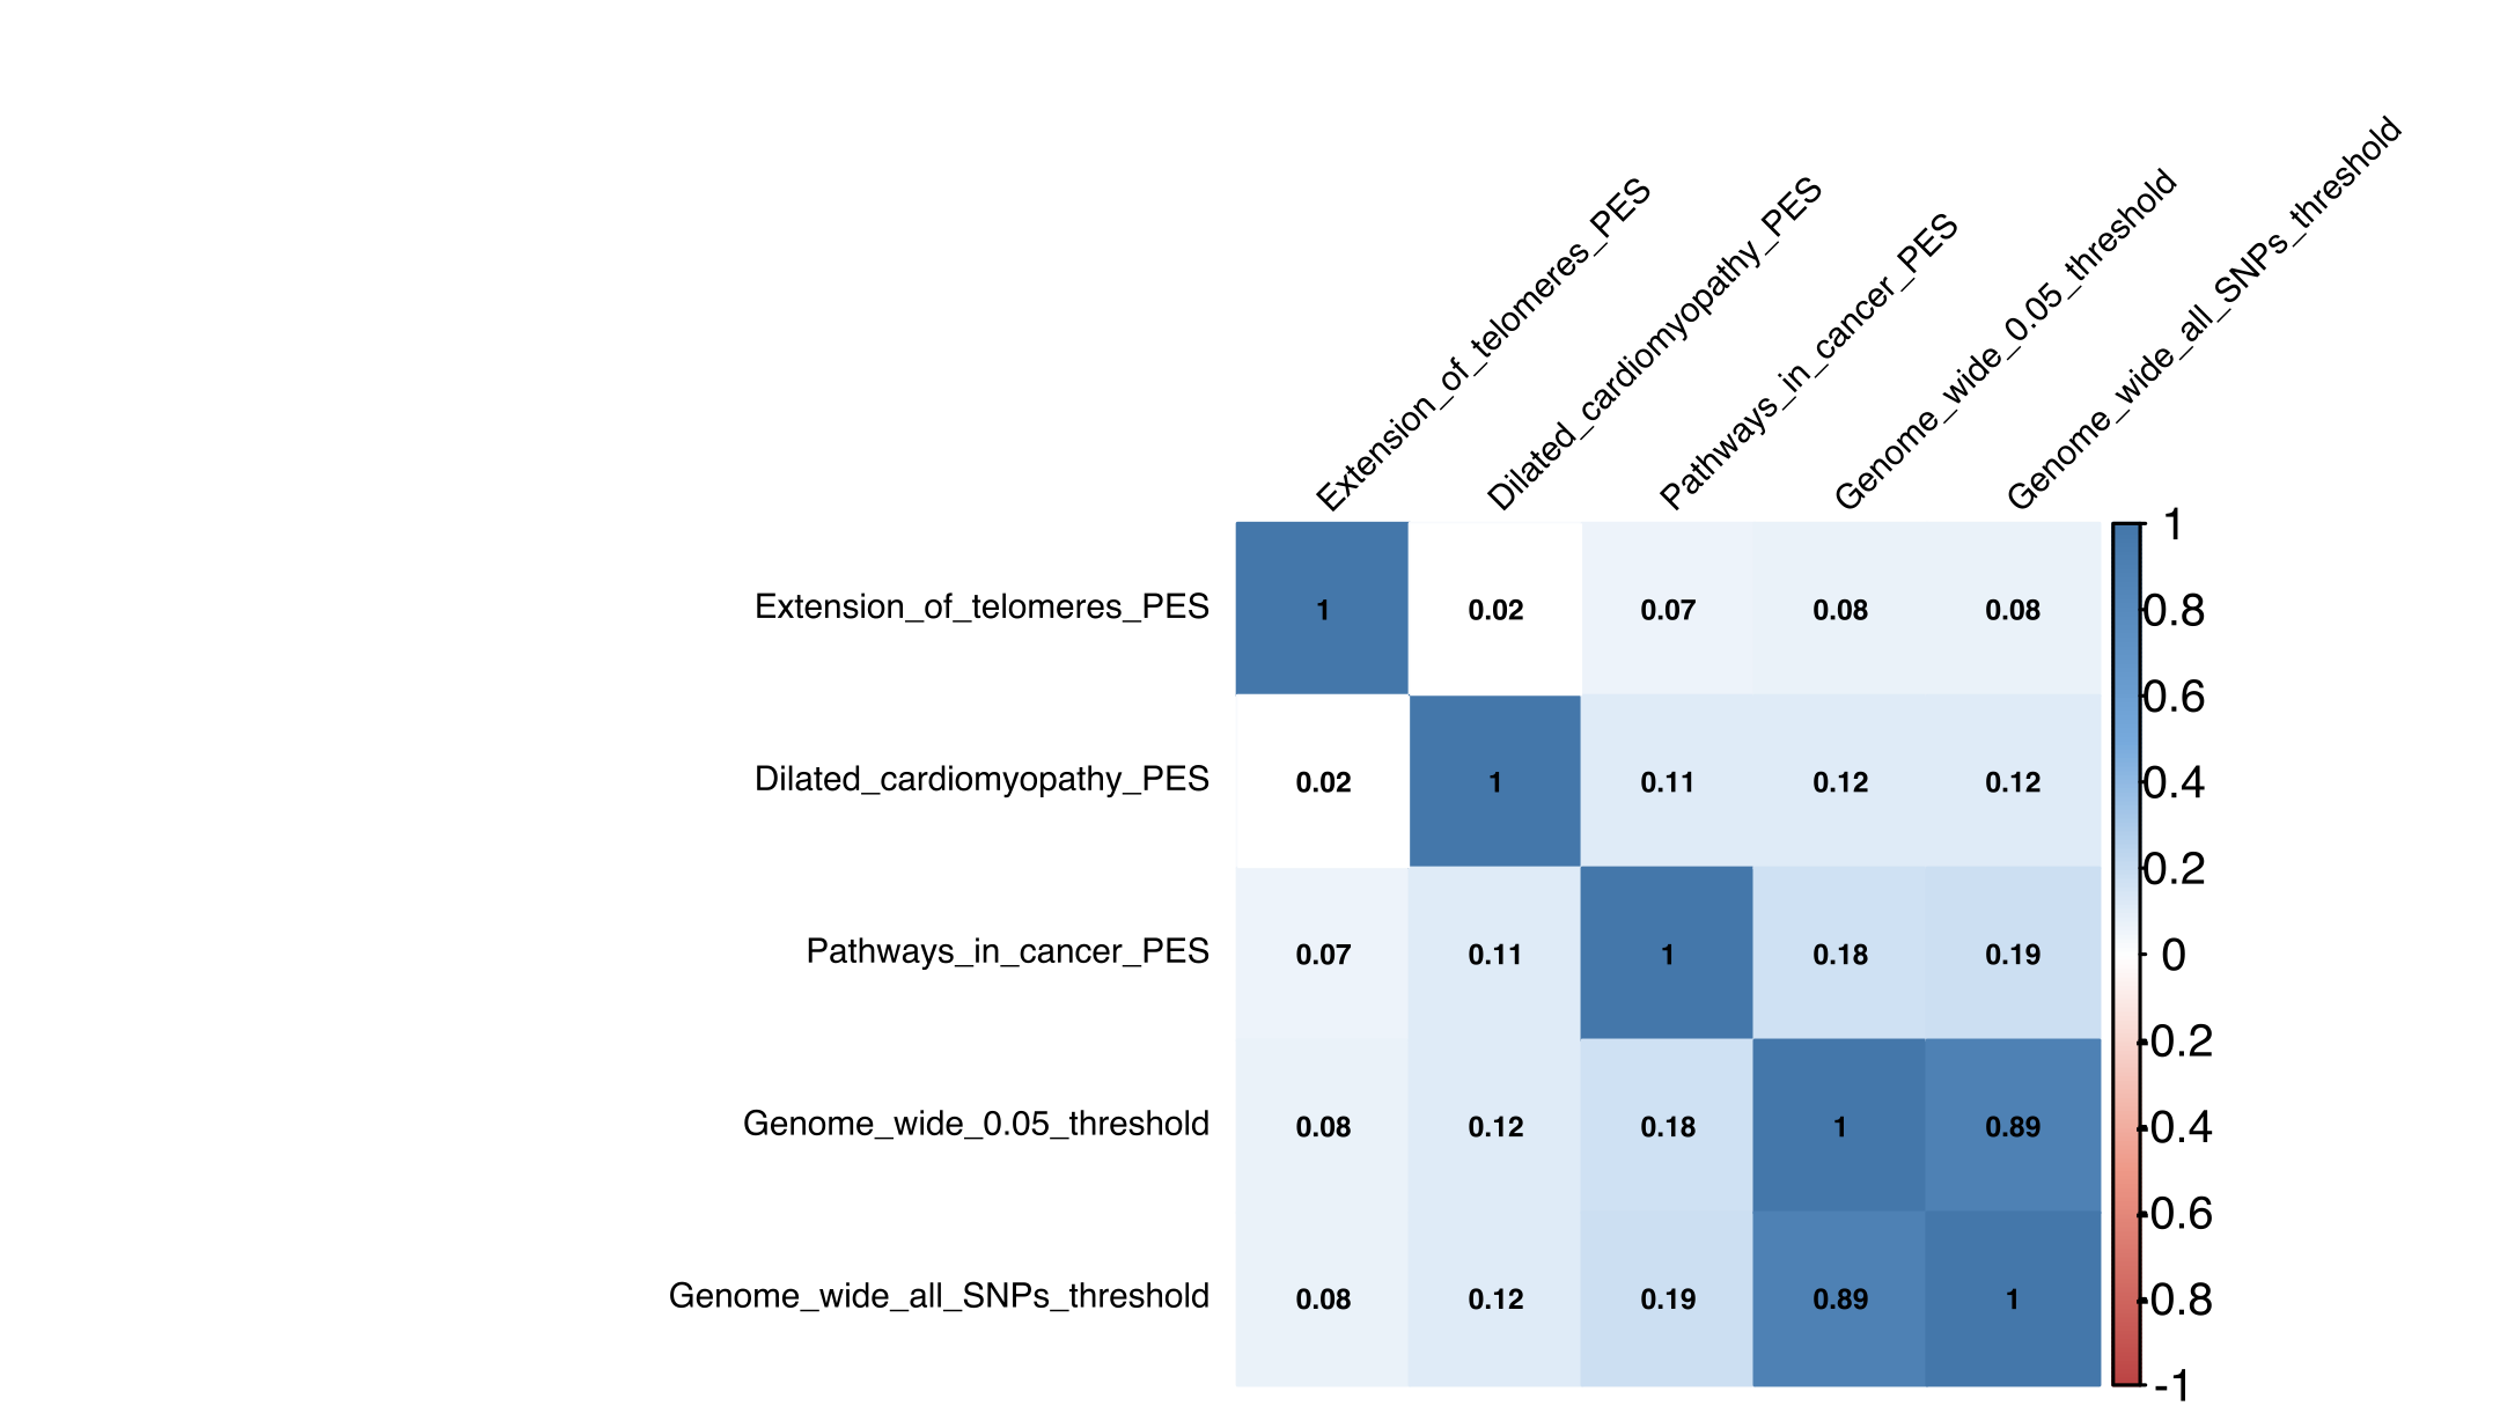
**Figure 3 – figure supplement 2. Correlations between genome wide PGS and PES**.

Each box denotes the correlation coefficient between one of the following, a) two PGS at different *P*-value thresholds, b) two PES, or c) a PGS and PES. Shaded boxes represent variables significantly correlated after the application of multiple testing correction. The top plot is for FEV1, followed by FVC represented by the lower correlation plot.
