# Supplementary material for: Genetic association and causal inference converge on hyperglycaemia as a modifiable factor to improve lung function
Source: eLife journal article supplement (doi:10.7554/elife.63115), 2021-03-15
Supplement: supp [file elife-63115-supp-v1.zip › elife_poa_e63115_Supplementary_File_1.xlsx]

## Sheet: Index
Supplementary Files 1: Index
Supplementary File 1a: Genetic correlations between FEV1 and 172 GWAS from the LDhub library
Supplementary File 1b: Genetic correlations between FVC and 172 GWAS from the LDhub library
Supplementary File 1c: Genetic correlations between FEV1/FVC and 172 GWAS from the LDhub library
Supplementary File 1d: Latent casual variable models constructed between metabolic/hormonal traits and measures of lung function
Supplementary File 1e: Two-sample Mendelian randomisation models testing the effect of fasting glucose on lung function
Supplementary File 1f: Two-sample Mendelian randomisation models testing the effect of fasting glucose on lung function: sensitivity and pleiotropy analyses
Supplementary File 1g: Two-sample Mendelian randomisation models testing the effect of fasting glucose on lung function: leave-one-out analyses
Supplementary File 1h: Phenome-wide association study of rs17168486 using GWAS atlas summary statistics
Supplementary File 1i: Phenome-wide association study of rs7903146 using GWAS atlas summary statistics
Supplementary File 1j: Phenome-wide association study of rs6975024 using GWAS atlas summary statistics
Supplementary File 1k: Phenome-wide association study of rs1260326 using GWAS atlas summary statistics
Supplementary File 1l: Phenome-wide association study of rs560887 using GWAS atlas summary statistics
Supplementary File 1m: Association of fasting glucose IV SNPs with smoking behaviour phenotypes - ever vs never smoked
Supplementary File 1n: Association of fasting glucose IV SNPs with smoking behaviour phenotypes - cigarettes smoked per day

## Sheet: Table_legends
Supplementary Files 1a-c
Trait1	Spirometry measure
Trait2	GWAS of interest (testing genetic correlation with spirometry measurement)
PMID	Reference for GWAS of trait 2
Category	Phenotypic category
Ethnicity	GWAS ethnicity
Note	Note specifying any filtering conditions applied to trait 2
rg	Genetic correlation estimate
se	Standard error of the genetic correlation estimate
z	Genetic correlation z value (rg/se)
p	Significance of the genetic correlation
h2_obs	SNP-based heritability of trait 2 on the observed scale
h2_obs_se	Standard error of SNP based hertiability of trait 2 on the observed scale
h2_int	LDSC interecept
h2_int_se	Standard error of the LDSC intercept
gcov_int	Genetic covariance
gcov_int_se	Standard error of the genetic covariance
Supplementary File 1d
Trait 1	Metabolite or hormone trait
Trait 2	Spirometry measure
GCP	Posterior mean estimate of the genetic causality proportion
SE	Standard error of the GCP
P	P value for test of whether the GCP is significantly different from zero
PMID (GWAS)	Refence of the GWAS for trait 1
Supplementary File 1e
Exposure	MR exposure
Outcome	MR outcome
Method	MR method utilised
NSNP	Number of genetic instrumental variables
Beta	Causal estimate from MR model per unit increase in exposure
SE	Standard error of MR causal estimate
ci_lower	Lower bound of the 95% confidence intervel of the causal estimate
ci_upper	Upper bound of the 95% confidence intervel of the causal estimate
P	MR P value
Supplementary File 1f
Exposure	MR exposure
Outcome	MR outcome
Test	Name of sensitivity/pleiotropy test
Test statistic name	Name of test statistic
P	P value for sensitivity/pleiotropy test
Supplementary File 1g
Exposure	MR exposure
Outcome	MR outcome
Removed SNP	SNP removed and the IVW estimate recalculated
Beta	Causal estimate recalculated with IV removed
SE	Standard error of recalculated causal estimate
P	MR P value of with IV removed
Gene	Gene IV SNP physically maps to
Glycaemic_role	Plausible role of this SNP in glycaemic biology (for outlier SNPs with a non-sig estimate upon removal)
PheWAS	PheWAS results for this IV-SNP
Supplementary Files 1h-l
GWAS atlas ID	ID for GWAS in GWAS atlas database
PMID	Reference for GWAS
Year	Year of GWAS publication
Domain	Phenotypic domain
Trait	Trait name
P-value	GWAS P value
N	GWAS sample size
EA	Effect allele
NEA	Non-effect allele
Supplementary Files 1m-n
IV SNP	IV SNP
OR (Smoking)/Beta (Smoking)	Test statistic for association with smoking phenotype
P (Smoking)	Smoking behaviour GWAS P value

## Sheet: ST1a
Supplementary File 1a: Genetic correlations between FEV1 and 172 GWAS from the LDhub library
Trait1	Trait2	PMID	Category	Ethnicity	Note	rg	se	z	p	h2_obs	h2_obs_se	h2_int	h2_int_se	gcov_int	gcov_int_se
FEV1_meta	Waist circumference	25673412	anthropometric	European	SNPs from the MHC (chr6 26M~34M) region was removed for this traits	-0.1923	0.021	-9.1497	5.71e-20	0.121	0.0051	0.8455	0.0075	0.0032	0.0069
FEV1_meta	Waist-to-hip ratio	25673412	anthropometric	European	SNPs from the MHC (chr6 26M~34M) region was removed for this traits	-0.1692	0.0215	-7.8572	3.93e-15	0.1129	0.0069	0.9212	0.0088	-0.0068	0.0065
FEV1_meta	College completion	23722424	education	European	SNPs from the MHC (chr6 26M~34M) region was removed for this traits	0.185	0.0253	7.315	2.57e-13	0.0792	0.0058	1.0211	0.0087	-0.0137	0.0067
FEV1_meta	Hip circumference	25673412	anthropometric	European	SNPs from the MHC (chr6 26M~34M) region was removed for this traits	-0.1572	0.023	-6.8397	7.94e-12	0.1274	0.0058	0.8604	0.0081	0.0096	0.0071
FEV1_meta	Years of schooling 2016	27225129	education	European	SNPs from the MHC (chr6 26M~34M) region was removed for this traits	0.1033	0.0163	6.3333	2.4e-10	0.1271	0.0044	0.9269	0.0101	0.0317	0.0071
FEV1_meta	Asthma	17611496	autoimmune	European	SNPs from the MHC (chr6 26M~34M) region was removed for this traits	-0.3366	0.0547	-6.1567	7.43e-10	0.1211	0.0266	1.0082	0.0082	-0.0104	0.0072
FEV1_meta	Obesity class 2	23563607	anthropometric	European	SNPs from the MHC (chr6 26M~34M) region was removed for this traits	-0.1642	0.0287	-5.713	1.11e-08	0.1845	0.0123	1.002	0.0098	0.0237	0.0085
FEV1_meta	Age of first birth	27798627	reproductive	European	SNPs from the MHC (chr6 26M~34M) region was removed for this traits	0.1211	0.0223	5.4218	5.9e-08	0.0629	0.0036	0.9518	0.008	0.0037	0.0061
FEV1_meta	Fasting insulin main effect	22581228	glycemic	European	SNPs from the MHC (chr6 26M~34M) region was removed for this traits	-0.2349	0.0435	-5.4015	6.61e-08	0.0696	0.0101	1.0159	0.0069	0.0053	0.0059
FEV1_meta	Obesity class 1	23563607	anthropometric	European	SNPs from the MHC (chr6 26M~34M) region was removed for this traits	-0.1113	0.0213	-5.2229	1.76e-07	0.2173	0.0116	1.018	0.0111	0.0192	0.0076
FEV1_meta	Leptin_not_adjBMI	26833098	hormone	European	SNPs from the MHC (chr6 26M~34M) region was removed for this traits	-0.2462	0.0484	-5.0815	3.74e-07	0.0996	0.016	0.9941	0.0065	-0.0095	0.0065
FEV1_meta	Type 2 Diabetes	22885922	glycemic	European	SNPs from the MHC (chr6 26M~34M) region was removed for this traits	-0.1713	0.0343	-4.9986	5.78e-07	0.0881	0.0093	1.0077	0.007	0.0005	0.0068
FEV1_meta	Leptin_adjBMI	26833098	hormone	European	SNPs from the MHC (chr6 26M~34M) region was removed for this traits	-0.2361	0.0481	-4.9096	9.13e-07	0.0955	0.0175	1.0031	0.007	-0.0132	0.0066
FEV1_meta	HOMA-IR	20081858	glycemic	European	SNPs from the MHC (chr6 26M~34M) region was removed for this traits	-0.2545	0.0529	-4.8125	1.49e-06	0.0685	0.0125	1.0031	0.0065	0.0103	0.0067
FEV1_meta	Overweight	23563607	anthropometric	European	SNPs from the MHC (chr6 26M~34M) region was removed for this traits	-0.1029	0.0215	-4.7789	1.76e-06	0.1096	0.0065	1.0245	0.0095	0.0157	0.0073
FEV1_meta	Obesity class 3	23563607	anthropometric	European	SNPs from the MHC (chr6 26M~34M) region was removed for this traits	-0.1891	0.0397	-4.7685	1.86e-06	0.122	0.0141	0.9797	0.0091	0.0159	0.0084
FEV1_meta	Fathers age at death	27015805	aging	European	SNPs from the MHC (chr6 26M~34M) region was removed for this traits	0.1915	0.0416	4.602	4.18e-06	0.04	0.0069	1.0177	0.0069	0.0092	0.0055
FEV1_meta	Urate	23263486	other	European	SNPs from the MHC (chr6 26M~34M) region was removed for this traits	-0.1192	0.0269	-4.4291	9.46e-06	0.1761	0.0583	0.9533	0.049	0.0091	0.0068
FEV1_meta	Extreme bmi	23563607	anthropometric	European	SNPs from the MHC (chr6 26M~34M) region was removed for this traits	-0.1419	0.0326	-4.3538	1.34e-05	0.6923	0.0547	1.0299	0.0112	0.0251	0.0102
FEV1_meta	Extreme waist-to-hip ratio	23563607	anthropometric	European	SNPs from the MHC (chr6 26M~34M) region was removed for this traits	-0.1823	0.0441	-4.135	3.55e-05	0.3606	0.057	0.9771	0.0084	-0.0079	0.0083
FEV1_meta	Cigarettes smoked per day	20418890	smoking_behaviour	European	SNPs from the MHC (chr6 26M~34M) region was removed for this traits	-0.2081	0.0504	-4.1296	3.63e-05	0.0601	0.015	1.0046	0.006	0.0083	0.0058
FEV1_meta	Anorexia Nervosa	24514567	psychiatric	European	SNPs from the MHC (chr6 26M~34M) region was removed for this traits	0.1012	0.0253	4.0003	6.33e-05	0.5573	0.0312	0.8982	0.0071	-0.0028	0.0062
FEV1_meta	Body mass index	20935630	anthropometric	European	SNPs from the MHC (chr6 26M~34M) region was removed for this traits	-0.0896	0.0224	-3.9947	6.48e-05	0.1899	0.0096	1.0102	0.0105	0.0184	0.0074
FEV1_meta	Fasting glucose main effect	22581228	glycemic	European	SNPs from the MHC (chr6 26M~34M) region was removed for this traits	-0.1281	0.0337	-3.8016	0.0001	0.0985	0.0189	0.9981	0.0094	0.0076	0.0062
FEV1_meta	Lung cancer	27488534	cancer	European	SNPs from the MHC (chr6 26M~34M) region was removed for this traits	-0.1425	0.0372	-3.8251	0.0001	0.3154	0.0679	1.0146	0.0074	0.0055	0.0055
FEV1_meta	Intelligence	28530673	cognitive	European	SNPs from the MHC (chr6 26M~34M) region was removed for this traits	0.0786	0.0224	3.5053	0.0005	0.1883	0.0104	1.0103	0.0081	0.0223	0.0064
FEV1_meta	Sitting height ratio	25865494	anthropometric	European	SNPs from the MHC (chr6 26M~34M) region was removed for this traits	0.1458	0.0435	3.3479	0.0008	0.2217	0.0282	0.9799	0.0076	0.0124	0.0073
FEV1_meta	Phospholipids in very large HDL	27005778	metabolites	European	SNPs from the MHC (chr6 26M~34M) region was removed for this traits	0.1756	0.0533	3.2939	0.001	0.0901	0.0301	1.0084	0.0167	-0.0072	0.0057
FEV1_meta	Mothers age at death	27015805	aging	European	SNPs from the MHC (chr6 26M~34M) region was removed for this traits	0.1493	0.0476	3.1343	0.0017	0.0355	0.0075	1.0133	0.0072	0.025	0.006
FEV1_meta	Mean diameter for HDL particles	27005778	metabolites	European	SNPs from the MHC (chr6 26M~34M) region was removed for this traits	0.1464	0.0473	3.0961	0.002	0.1182	0.03	1.0089	0.0188	-0.005	0.0058
FEV1_meta	HDL cholesterol	20686565	lipids	European	SNPs from the MHC (chr6 26M~34M) region was removed for this traits	0.0788	0.0262	3.0044	0.0027	0.1273	0.0229	1.0579	0.0494	-0.0017	0.0072
FEV1_meta	Ever vs never smoked	20418890	smoking_behaviour	European	SNPs from the MHC (chr6 26M~34M) region was removed for this traits	-0.1052	0.0353	-2.9769	0.0029	0.0746	0.0065	0.9976	0.006	0.0069	0.0058
FEV1_meta	Free cholesterol in large HDL	27005778	metabolites	European	SNPs from the MHC (chr6 26M~34M) region was removed for this traits	0.1373	0.0472	2.9094	0.0036	0.1054	0.0284	1.0087	0.0141	0.0003	0.0057
FEV1_meta	Lung cancer (all)	24880342	cancer	European	SNPs from the MHC (chr6 26M~34M) region was removed for this traits	-0.1265	0.044	-2.8749	0.004	0.129	0.0295	1.0073	0.008	0.001	0.0065
FEV1_meta	Own birth weight	31043758	anthropometric	European	SNPs from the MHC (chr6 26M~34M) region was removed for this traits	0.0637	0.0222	2.8687	0.0041	0.0988	0.0054	1.0811	0.0157	0.0178	0.0076
FEV1_meta	Former vs Current smoker	20418890	smoking_behaviour	European	SNPs from the MHC (chr6 26M~34M) region was removed for this traits	0.1422	0.0501	2.8395	0.0045	0.0628	0.0104	1.0009	0.0066	-0.0006	0.0062
FEV1_meta	Primary biliary cirrhosis	26394269	autoimmune	European	SNPs from the MHC (chr6 26M~34M) region was removed for this traits	-0.1347	0.0475	-2.8376	0.0045	0.3752	0.0635	1.0039	0.0098	0.0075	0.0082
FEV1_meta	Valine	27005778	metabolites	European	SNPs from the MHC (chr6 26M~34M) region was removed for this traits	-0.1832	0.066	-2.7768	0.0055	0.0603	0.0194	1.0159	0.0075	0.0075	0.0055
FEV1_meta	Birth weight	27680694	anthropometric	European	SNPs from the MHC (chr6 26M~34M) region was removed for this traits	0.0681	0.0246	2.7723	0.0056	0.1024	0.0066	1.042	0.0098	0.0164	0.0067
FEV1_meta	Total cholesterol in large HDL	27005778	metabolites	European	SNPs from the MHC (chr6 26M~34M) region was removed for this traits	0.1363	0.0491	2.7729	0.0056	0.1039	0.0286	1.0071	0.0143	-0.001	0.0056
FEV1_meta	Offspring birth weight (maternal effect)	31043758	anthropometric	European	SNPs from the MHC (chr6 26M~34M) region was removed for this traits	0.067	0.0246	2.7282	0.0064	0.1047	0.0059	1.0497	0.0124	0.0026	0.0078
FEV1_meta	Chronotype	27494321	sleeping	European	SNPs from the MHC (chr6 26M~34M) region was removed for this traits	-0.0662	0.0243	-2.7206	0.0065	0.101	0.0058	1.015	0.0076	0.02	0.0061
FEV1_meta	Glycoprotein acetyls; mainly a1-acid glycoprotein	27005778	metabolites	European	SNPs from the MHC (chr6 26M~34M) region was removed for this traits	-0.1382	0.0508	-2.7213	0.0065	0.1024	0.0288	0.9849	0.0063	-0.0091	0.0055
FEV1_meta	Triglycerides	20686565	lipids	European	SNPs from the MHC (chr6 26M~34M) region was removed for this traits	-0.0732	0.0271	-2.7032	0.0069	0.1679	0.0288	0.9683	0.0162	-0.0009	0.0073
FEV1_meta	Cholesterol esters in large HDL	27005778	metabolites	European	SNPs from the MHC (chr6 26M~34M) region was removed for this traits	0.1279	0.0479	2.6718	0.0075	0.1222	0.0311	1.0012	0.0142	-0.0013	0.0056
FEV1_meta	Total lipids in large HDL	27005778	metabolites	European	SNPs from the MHC (chr6 26M~34M) region was removed for this traits	0.1189	0.045	2.6435	0.0082	0.1296	0.0308	1.001	0.0148	0.0009	0.0056
FEV1_meta	Urinary albumin-to-creatinine ratio	26631737	kidney	European	SNPs from the MHC (chr6 26M~34M) region was removed for this traits	-0.1377	0.0524	-2.6274	0.0086	0.0456	0.0088	0.9962	0.0068	-0.0043	0.0076
FEV1_meta	HOMA-B	20081858	glycemic	European	SNPs from the MHC (chr6 26M~34M) region was removed for this traits	-0.1209	0.0466	-2.5941	0.0095	0.0908	0.0134	0.9888	0.0063	0.0046	0.0068
FEV1_meta	Concentration of large HDL particles	27005778	metabolites	European	SNPs from the MHC (chr6 26M~34M) region was removed for this traits	0.1147	0.0443	2.5903	0.0096	0.1316	0.0303	0.9998	0.0151	0.0015	0.0056
FEV1_meta	Childhood IQ	23358156	education	European	SNPs from the MHC (chr6 26M~34M) region was removed for this traits	0.122	0.0479	2.548	0.0108	0.2749	0.0452	1.0019	0.0093	-0.0019	0.0085
FEV1_meta	Phospholipids in large HDL	27005778	metabolites	European	SNPs from the MHC (chr6 26M~34M) region was removed for this traits	0.1091	0.045	2.4247	0.0153	0.1262	0.0302	0.9987	0.014	0.003	0.0056
FEV1_meta	Height_2010	20881960	anthropometric	European	SNPs from the MHC (chr6 26M~34M) region was removed for this traits	-0.0552	0.0232	-2.3826	0.0172	0.2857	0.0164	1.0181	0.0186	0.0015	0.0087
FEV1_meta	Squamous cell lung cancer	27488534	cancer	European	SNPs from the MHC (chr6 26M~34M) region was removed for this traits	-0.144	0.0612	-2.3541	0.0186	0.0387	0.0122	1.0108	0.0066	0.0006	0.0065
FEV1_meta	Child birth length	25281659	anthropometric	European	SNPs from the MHC (chr6 26M~34M) region was removed for this traits	0.0949	0.0404	2.351	0.0187	0.1704	0.0233	0.9924	0.0072	-0.0044	0.0067
FEV1_meta	Total cholesterol in HDL	27005778	metabolites	European	SNPs from the MHC (chr6 26M~34M) region was removed for this traits	0.1123	0.0489	2.2941	0.0218	0.0925	0.0283	1.0071	0.0128	0.0011	0.0056
FEV1_meta	Childhood obesity	22484627	anthropometric	European	SNPs from the MHC (chr6 26M~34M) region was removed for this traits	-0.0678	0.0306	-2.2142	0.0268	0.4128	0.0461	0.9266	0.0075	0.011	0.0058
FEV1_meta	Depressive symptoms	27089181	psychiatric	European	SNPs from the MHC (chr6 26M~34M) region was removed for this traits	-0.0738	0.0336	-2.1948	0.0282	0.0475	0.0037	1.0001	0.0071	-0.0207	0.0065
FEV1_meta	Age at Menarche	25231870	reproductive	European	SNPs from the MHC (chr6 26M~34M) region was removed for this traits	0.0415	0.0194	2.1421	0.0322	0.2018	0.0099	0.9541	0.0117	0.0123	0.0067
FEV1_meta	Celiac disease	20190752	autoimmune	European	SNPs from the MHC (chr6 26M~34M) region was removed for this traits	0.0897	0.0421	2.131	0.0331	0.3086	0.0489	1.0649	0.0108	-0.0231	0.0094
FEV1_meta	Child birth weight	23202124	anthropometric	European	SNPs from the MHC (chr6 26M~34M) region was removed for this traits	0.0797	0.0381	2.0947	0.0362	0.1108	0.0179	1.0053	0.0058	0.0044	0.0057
FEV1_meta	Difference in height between adolescence and adulthood; age 14	23449627	anthropometric	European	SNPs from the MHC (chr6 26M~34M) region was removed for this traits	0.1095	0.053	2.0672	0.0387	0.4531	0.1104	0.9814	0.0067	-0.0075	0.0061
FEV1_meta	Crohns disease	26192919	autoimmune	European	SNPs from the MHC (chr6 26M~34M) region was removed for this traits	-0.0557	0.0271	-2.0572	0.0397	0.5028	0.0576	1.023	0.0116	-0.006	0.0066
FEV1_meta	Urinary albumin-to-creatinine ratio (non-diabetes)	26631737	kidney	European	SNPs from the MHC (chr6 26M~34M) region was removed for this traits	-0.1105	0.0538	-2.0524	0.0401	0.0534	0.0107	0.9949	0.0073	-0.0034	0.0076
FEV1_meta	Glutamine	27005778	metabolites	European	SNPs from the MHC (chr6 26M~34M) region was removed for this traits	0.1263	0.0624	2.0235	0.043	0.0617	0.0205	1.0188	0.0077	0.0037	0.0056
FEV1_meta	Age at Menopause	26414677	reproductive	European	SNPs from the MHC (chr6 26M~34M) region was removed for this traits	0.0537	0.0268	2.0045	0.045	0.1359	0.0159	0.9896	0.0139	-0.0035	0.0065
FEV1_meta	Concentration of medium VLDL particles	27005778	metabolites	European	SNPs from the MHC (chr6 26M~34M) region was removed for this traits	-0.0871	0.0437	-1.9934	0.0462	0.1497	0.0354	0.9808	0.0068	-0.0009	0.0064
FEV1_meta	Creatinine	27005778	metabolites	European	SNPs from the MHC (chr6 26M~34M) region was removed for this traits	0.0835	0.0423	1.9725	0.0486	0.1156	0.0247	1.0117	0.0073	0.0012	0.0061
FEV1_meta	Platelet count	22139419	haemotological	European	SNPs from the MHC (chr6 26M~34M) region was removed for this traits	-0.0554	0.0285	-1.946	0.0517	0.1204	0.0114	0.9844	0.0081	0.0058	0.0061
FEV1_meta	Parents age at death	27015805	aging	European	SNPs from the MHC (chr6 26M~34M) region was removed for this traits	0.1027	0.0549	1.8703	0.0614	0.0288	0.0069	1.0161	0.0063	0.0268	0.0065
FEV1_meta	Total lipids in large VLDL	27005778	metabolites	European	SNPs from the MHC (chr6 26M~34M) region was removed for this traits	-0.0839	0.0454	-1.8501	0.0643	0.14	0.03	0.9852	0.0063	-0.0036	0.0063
FEV1_meta	Isoleucine	27005778	metabolites	European	SNPs from the MHC (chr6 26M~34M) region was removed for this traits	-0.1052	0.0572	-1.8377	0.0661	0.0718	0.0234	0.9944	0.0066	-0.004	0.0056
FEV1_meta	Major depressive disorder	22472876	psychiatric	European	SNPs from the MHC (chr6 26M~34M) region was removed for this traits	-0.0845	0.0461	-1.8348	0.0665	0.1714	0.0255	1.0053	0.006	0.002	0.006
FEV1_meta	Concentration of large VLDL particles	27005778	metabolites	European	SNPs from the MHC (chr6 26M~34M) region was removed for this traits	-0.0871	0.0475	-1.8331	0.0668	0.1319	0.0345	0.9742	0.0068	-0.0011	0.0061
FEV1_meta	Offspring birth weight	31043758	anthropometric	European	SNPs from the MHC (chr6 26M~34M) region was removed for this traits	0.0581	0.0321	1.8112	0.0701	0.0298	0.0026	1.0229	0.0082	-0.0029	0.0066
FEV1_meta	Own birth weight (fetal effect)	31043758	anthropometric	European	SNPs from the MHC (chr6 26M~34M) region was removed for this traits	0.0535	0.0299	1.7895	0.0735	0.0302	0.0029	1.0362	0.0088	0.0116	0.0062
FEV1_meta	Total lipids in small VLDL	27005778	metabolites	European	SNPs from the MHC (chr6 26M~34M) region was removed for this traits	-0.0766	0.0459	-1.6691	0.0951	0.1458	0.0373	0.9915	0.0081	0.0008	0.0062
FEV1_meta	Concentration of small VLDL particles	27005778	metabolites	European	SNPs from the MHC (chr6 26M~34M) region was removed for this traits	-0.074	0.0449	-1.6461	0.0997	0.1514	0.0372	0.99	0.0078	0.0003	0.0063
FEV1_meta	18:2 linoleic acid (LA)	27005778	metabolites	European	SNPs from the MHC (chr6 26M~34M) region was removed for this traits	0.0937	0.0574	1.6318	0.1027	0.1284	0.0483	1.0028	0.0098	-0.0066	0.0061
FEV1_meta	Free cholesterol in small VLDL	27005778	metabolites	European	SNPs from the MHC (chr6 26M~34M) region was removed for this traits	-0.0832	0.0513	-1.6197	0.1053	0.1125	0.0336	0.9998	0.0087	0.0001	0.0063
FEV1_meta	Total lipids in medium VLDL	27005778	metabolites	European	SNPs from the MHC (chr6 26M~34M) region was removed for this traits	-0.073	0.0456	-1.6011	0.1093	0.141	0.0342	0.9857	0.0066	-0.0012	0.0063
FEV1_meta	Excessive daytime sleepiness	27992416	sleeping	European	SNPs from the MHC (chr6 26M~34M) region was removed for this traits	-0.0518	0.0325	-1.5951	0.1107	0.0538	0.0052	1.0033	0.0067	-0.0175	0.0057
FEV1_meta	Triglycerides in large VLDL	27005778	metabolites	European	SNPs from the MHC (chr6 26M~34M) region was removed for this traits	-0.0778	0.049	-1.5875	0.1124	0.1128	0.0286	0.9886	0.0063	-0.0055	0.0061
FEV1_meta	Serum total triglycerides	27005778	metabolites	European	SNPs from the MHC (chr6 26M~34M) region was removed for this traits	-0.0755	0.0487	-1.5516	0.1208	0.1257	0.0355	0.992	0.0075	-0.0044	0.0065
FEV1_meta	Triglycerides in small VLDL	27005778	metabolites	European	SNPs from the MHC (chr6 26M~34M) region was removed for this traits	-0.0764	0.0495	-1.545	0.1223	0.1204	0.0349	0.9941	0.0072	-0.0019	0.0063
FEV1_meta	Phospholipids in small VLDL	27005778	metabolites	European	SNPs from the MHC (chr6 26M~34M) region was removed for this traits	-0.0738	0.0479	-1.5419	0.1231	0.1176	0.0349	0.9982	0.0084	-0.001	0.0062
FEV1_meta	Mean diameter for VLDL particles	27005778	metabolites	European	SNPs from the MHC (chr6 26M~34M) region was removed for this traits	-0.0684	0.0451	-1.5165	0.1294	0.134	0.0348	0.9904	0.0085	-0.0032	0.0059
FEV1_meta	Subjective well being	27089181	psychiatric	European	SNPs from the MHC (chr6 26M~34M) region was removed for this traits	0.046	0.0307	1.4977	0.1342	0.0251	0.0021	1.001	0.0072	-0.0043	0.0067
FEV1_meta	Extreme height	23563607	anthropometric	European	SNPs from the MHC (chr6 26M~34M) region was removed for this traits	-0.0459	0.0307	-1.4921	0.1357	1.2296	0.1066	1.0367	0.0175	-0.0179	0.0112
FEV1_meta	Citrate	27005778	metabolites	European	SNPs from the MHC (chr6 26M~34M) region was removed for this traits	0.0896	0.0616	1.4543	0.1459	0.0707	0.0208	1.012	0.0076	-0.003	0.0059
FEV1_meta	Triglycerides in very small VLDL	27005778	metabolites	European	SNPs from the MHC (chr6 26M~34M) region was removed for this traits	-0.0696	0.0481	-1.4455	0.1483	0.1396	0.0364	0.9981	0.0096	0.0023	0.0064
FEV1_meta	Cholesterol esters in medium VLDL	27005778	metabolites	European	SNPs from the MHC (chr6 26M~34M) region was removed for this traits	-0.0625	0.0433	-1.4439	0.1488	0.1526	0.0374	0.9861	0.0079	-0.0018	0.0063
FEV1_meta	Height; Females at age 10 and males at age 12	23449627	anthropometric	European	SNPs from the MHC (chr6 26M~34M) region was removed for this traits	-0.0531	0.037	-1.437	0.1507	0.4304	0.0479	0.9526	0.0079	0.008	0.0076
FEV1_meta	Apolipoprotein A-I	27005778	metabolites	European	SNPs from the MHC (chr6 26M~34M) region was removed for this traits	0.0856	0.0598	1.4325	0.152	0.0717	0.0307	1.0058	0.0118	0.0033	0.0061
FEV1_meta	22:6 docosahexaenoic acid	27005778	metabolites	European	SNPs from the MHC (chr6 26M~34M) region was removed for this traits	0.0747	0.053	1.4105	0.1584	0.1306	0.037	0.9958	0.0072	-1.94e-05	0.006
FEV1_meta	Alanine	27005778	metabolites	European	SNPs from the MHC (chr6 26M~34M) region was removed for this traits	0.0717	0.0509	1.4075	0.1593	0.0845	0.0271	1.0119	0.0072	-0.0066	0.0058
FEV1_meta	Concentration of chylomicrons and largest VLDL particles	27005778	metabolites	European	SNPs from the MHC (chr6 26M~34M) region was removed for this traits	-0.0683	0.0492	-1.3872	0.1654	0.117	0.0266	0.9881	0.0065	-0.0031	0.0063
FEV1_meta	Neuroticism	27089181	personality	European	SNPs from the MHC (chr6 26M~34M) region was removed for this traits	-0.0406	0.0294	-1.382	0.167	0.0893	0.0074	0.9901	0.0117	-0.0123	0.0076
FEV1_meta	Apolipoprotein B	27005778	metabolites	European	SNPs from the MHC (chr6 26M~34M) region was removed for this traits	-0.0903	0.068	-1.3283	0.1841	0.0831	0.04	1.0088	0.0147	0.0034	0.0069
FEV1_meta	Number of children ever born	27798627	reproductive	European	SNPs from the MHC (chr6 26M~34M) region was removed for this traits	-0.0402	0.0305	-1.3175	0.1877	0.0257	0.0018	0.9697	0.007	0.0062	0.0068
FEV1_meta	Mean Putamen	25607358	brain_volume	European	SNPs from the MHC (chr6 26M~34M) region was removed for this traits	0.0525	0.04	1.3106	0.19	0.2983	0.0461	0.9502	0.0068	-0.0119	0.006
FEV1_meta	Total lipids in very large VLDL	27005778	metabolites	European	SNPs from the MHC (chr6 26M~34M) region was removed for this traits	-0.062	0.0475	-1.3041	0.1922	0.137	0.03	0.9784	0.0071	-0.0053	0.0063
FEV1_meta	HbA1C	20858683	glycemic	European	SNPs from the MHC (chr6 26M~34M) region was removed for this traits	-0.0501	0.0386	-1.2958	0.195	0.0653	0.0117	0.9991	0.0071	-0.0082	0.0056
FEV1_meta	Triglycerides in medium VLDL	27005778	metabolites	European	SNPs from the MHC (chr6 26M~34M) region was removed for this traits	-0.0696	0.054	-1.2884	0.1976	0.0971	0.03	0.9989	0.0065	-0.0024	0.0061
FEV1_meta	Free cholesterol in medium VLDL	27005778	metabolites	European	SNPs from the MHC (chr6 26M~34M) region was removed for this traits	-0.0646	0.0503	-1.2853	0.1987	0.1119	0.0331	0.9956	0.007	-0.0027	0.0063
FEV1_meta	Mean Caudate	25607358	brain_volume	European	SNPs from the MHC (chr6 26M~34M) region was removed for this traits	0.0593	0.0463	1.279	0.2009	0.2495	0.0387	0.9686	0.006	-0.0083	0.0065
FEV1_meta	Cholesterol esters in large VLDL	27005778	metabolites	European	SNPs from the MHC (chr6 26M~34M) region was removed for this traits	-0.0532	0.0418	-1.273	0.203	0.1648	0.0343	0.9777	0.0069	-0.0072	0.0061
FEV1_meta	Total cholesterol in medium VLDL	27005778	metabolites	European	SNPs from the MHC (chr6 26M~34M) region was removed for this traits	-0.0574	0.0456	-1.2583	0.2083	0.1257	0.0351	0.9921	0.0075	-0.0038	0.0063
FEV1_meta	Total cholesterol in small VLDL	27005778	metabolites	European	SNPs from the MHC (chr6 26M~34M) region was removed for this traits	-0.0684	0.055	-1.2435	0.2137	0.0921	0.0321	1.005	0.0097	0.0002	0.006
FEV1_meta	LDL cholesterol	20686565	lipids	European	SNPs from the MHC (chr6 26M~34M) region was removed for this traits	-0.0382	0.0311	-1.2274	0.2197	0.104	0.0284	1.0515	0.0483	0.0118	0.0079
FEV1_meta	Phospholipids in medium VLDL	27005778	metabolites	European	SNPs from the MHC (chr6 26M~34M) region was removed for this traits	-0.0629	0.0513	-1.2262	0.2201	0.111	0.0328	0.9969	0.0069	-0.0024	0.0063
FEV1_meta	Phospholipids in large VLDL	27005778	metabolites	European	SNPs from the MHC (chr6 26M~34M) region was removed for this traits	-0.0598	0.0491	-1.216	0.224	0.117	0.0304	0.9894	0.0064	-0.0064	0.0063
FEV1_meta	Difference in height between childhood and adulthood; age 8	23449627	anthropometric	European	SNPs from the MHC (chr6 26M~34M) region was removed for this traits	0.056	0.0462	1.2126	0.2253	0.3378	0.0507	0.9712	0.0076	-0.0029	0.0072
FEV1_meta	Inflammatory Bowel Disease (Euro)	26192919	autoimmune	European	SNPs from the MHC (chr6 26M~34M) region was removed for this traits	-0.0323	0.0268	-1.2072	0.2273	0.3344	0.0335	1.0536	0.0103	-0.0065	0.006
FEV1_meta	Total lipids in chylomicrons and largest VLDL particles	27005778	metabolites	European	SNPs from the MHC (chr6 26M~34M) region was removed for this traits	-0.0564	0.0485	-1.162	0.2453	0.1202	0.0277	0.9898	0.0067	-0.0062	0.0062
FEV1_meta	Infant head circumference	22504419	anthropometric	European	SNPs from the MHC (chr6 26M~34M) region was removed for this traits	0.0538	0.0464	1.1583	0.2467	0.2309	0.0446	0.9904	0.0067	-0.0052	0.0056
FEV1_meta	Phospholipids in very large VLDL	27005778	metabolites	European	SNPs from the MHC (chr6 26M~34M) region was removed for this traits	-0.0587	0.0508	-1.1556	0.2479	0.1071	0.0278	0.9854	0.0067	-0.0071	0.0061
FEV1_meta	Triglycerides in very large VLDL	27005778	metabolites	European	SNPs from the MHC (chr6 26M~34M) region was removed for this traits	-0.0527	0.0484	-1.0893	0.276	0.118	0.0294	0.9817	0.007	-0.0086	0.006
FEV1_meta	Triglycerides in IDL	27005778	metabolites	European	SNPs from the MHC (chr6 26M~34M) region was removed for this traits	-0.0602	0.0553	-1.0878	0.2767	0.1079	0.0345	1.0105	0.0149	0.0022	0.0065
FEV1_meta	Insomnia	28604731	sleeping	European	SNPs from the MHC (chr6 26M~34M) region was removed for this traits	-0.0399	0.0373	-1.0689	0.2851	0.0475	0.0049	1.0032	0.007	-0.016	0.0065
FEV1_meta	Concentration of very large VLDL particles	27005778	metabolites	European	SNPs from the MHC (chr6 26M~34M) region was removed for this traits	-0.0479	0.0473	-1.0132	0.311	0.1255	0.0296	0.9833	0.0067	-0.0078	0.0061
FEV1_meta	Omega-3 fatty acids	27005778	metabolites	European	SNPs from the MHC (chr6 26M~34M) region was removed for this traits	0.05	0.0503	0.9944	0.32	0.1545	0.0417	0.9911	0.0077	-0.0032	0.0066
FEV1_meta	ICV	25607358	brain_volume	European	SNPs from the MHC (chr6 26M~34M) region was removed for this traits	0.0522	0.0525	0.9935	0.3205	0.1744	0.0452	1.0025	0.0067	-0.0087	0.0064
FEV1_meta	PGC cross-disorder analysis	23453885	psychiatric	European	SNPs from the MHC (chr6 26M~34M) region was removed for this traits	-0.0279	0.0286	-0.973	0.3306	0.1724	0.0133	1.014	0.0116	-0.0124	0.0085
FEV1_meta	Parkinsons disease	19915575	neurological	European	SNPs from the MHC (chr6 26M~34M) region was removed for this traits	-0.0313	0.0323	-0.9701	0.332	0.4152	0.1187	1.1232	0.009	-0.0016	0.0057
FEV1_meta	Free cholesterol in large VLDL	27005778	metabolites	European	SNPs from the MHC (chr6 26M~34M) region was removed for this traits	-0.047	0.0488	-0.964	0.3351	0.1233	0.0297	0.9887	0.0067	-0.0073	0.0064
FEV1_meta	Concentration of very small VLDL particles	27005778	metabolites	European	SNPs from the MHC (chr6 26M~34M) region was removed for this traits	-0.0482	0.0539	-0.8947	0.371	0.1169	0.0357	1.0052	0.0123	0.0021	0.0066
FEV1_meta	Phospholipids in chylomicrons and largest VLDL particles	27005778	metabolites	European	SNPs from the MHC (chr6 26M~34M) region was removed for this traits	-0.0457	0.0514	-0.8891	0.374	0.0977	0.0265	0.9847	0.0067	-0.0096	0.0062
FEV1_meta	Mean Thalamus	25607358	brain_volume	European	SNPs from the MHC (chr6 26M~34M) region was removed for this traits	0.0519	0.0585	0.8876	0.3748	0.1391	0.0358	0.9795	0.0063	-0.0057	0.0064
FEV1_meta	Triglycerides in chylomicrons and largest VLDL particles	27005778	metabolites	European	SNPs from the MHC (chr6 26M~34M) region was removed for this traits	-0.0472	0.0535	-0.8809	0.3784	0.0912	0.0271	0.9906	0.0065	-0.0123	0.0062
FEV1_meta	Alzheimers disease	24162737	neurological	European	SNPs from the MHC (chr6 26M~34M) region was removed for this traits	-0.0425	0.0495	-0.8593	0.3902	0.0446	0.0213	1.066	0.0294	-0.0011	0.0062
FEV1_meta	Total lipids in very small VLDL	27005778	metabolites	European	SNPs from the MHC (chr6 26M~34M) region was removed for this traits	-0.0472	0.0558	-0.8461	0.3975	0.107	0.036	1.0098	0.0127	0.0029	0.0064
FEV1_meta	Total Cholesterol	20686565	lipids	European	SNPs from the MHC (chr6 26M~34M) region was removed for this traits	-0.0225	0.0266	-0.8433	0.3991	0.1342	0.0241	1.021	0.0348	0.006	0.0073
FEV1_meta	Phospholipids in medium LDL	27005778	metabolites	European	SNPs from the MHC (chr6 26M~34M) region was removed for this traits	-0.0509	0.0654	-0.778	0.4366	0.073	0.0428	1.0086	0.0192	0.0052	0.0065
FEV1_meta	Mean Hippocampus	25607358	brain_volume	European	SNPs from the MHC (chr6 26M~34M) region was removed for this traits	-0.046	0.061	-0.7531	0.4514	0.1416	0.0389	0.9873	0.0065	-0.0014	0.0062
FEV1_meta	Smoking Initiation	30617275	smoking_behaviour	European	SNPs from the MHC (chr6 26M~34M) region was removed for this traits	0.0279	0.0417	0.6689	0.5036	0.0053	0.0011	1.102	0.0093	-0.0242	0.0073
FEV1_meta	Total cholesterol in large VLDL	27005778	metabolites	European	SNPs from the MHC (chr6 26M~34M) region was removed for this traits	-0.0335	0.0502	-0.6665	0.5051	0.1173	0.0286	0.9915	0.0067	-0.0075	0.0062
FEV1_meta	Phospholipids in very small VLDL	27005778	metabolites	European	SNPs from the MHC (chr6 26M~34M) region was removed for this traits	-0.0417	0.0663	-0.6286	0.5296	0.0849	0.038	1.015	0.0154	0.0055	0.0066
FEV1_meta	Age of smoking initiation	20418890	smoking_behaviour	European	SNPs from the MHC (chr6 26M~34M) region was removed for this traits	-0.0332	0.0531	-0.6252	0.5319	0.0613	0.0185	0.9994	0.0063	0.0133	0.006
FEV1_meta	Description of average fatty acid chain length; not actual carbon number	27005778	metabolites	European	SNPs from the MHC (chr6 26M~34M) region was removed for this traits	-0.0374	0.0598	-0.6247	0.5322	0.1005	0.034	0.9831	0.0065	0.0148	0.0063
FEV1_meta	Cholesterol esters in large LDL	27005778	metabolites	European	SNPs from the MHC (chr6 26M~34M) region was removed for this traits	-0.0429	0.0687	-0.6241	0.5326	0.0765	0.0509	1.0124	0.0218	0.0048	0.0065
FEV1_meta	Concentration of medium LDL particles	27005778	metabolites	European	SNPs from the MHC (chr6 26M~34M) region was removed for this traits	-0.0414	0.0666	-0.6211	0.5345	0.0798	0.0487	1.0117	0.0201	0.0024	0.0066
FEV1_meta	Glucose	27005778	metabolites	European	SNPs from the MHC (chr6 26M~34M) region was removed for this traits	-0.0323	0.0528	-0.6111	0.5411	0.0856	0.0209	0.9962	0.0065	-0.0044	0.006
FEV1_meta	Concentration of large LDL particles	27005778	metabolites	European	SNPs from the MHC (chr6 26M~34M) region was removed for this traits	-0.0399	0.0697	-0.5721	0.5673	0.0753	0.0503	1.0161	0.0215	0.0037	0.0066
FEV1_meta	Concentration of IDL particles	27005778	metabolites	European	SNPs from the MHC (chr6 26M~34M) region was removed for this traits	-0.0398	0.0699	-0.5695	0.569	0.0746	0.043	1.0186	0.0181	0.0036	0.0067
FEV1_meta	Total lipids in large LDL	27005778	metabolites	European	SNPs from the MHC (chr6 26M~34M) region was removed for this traits	-0.0385	0.0696	-0.5538	0.5797	0.0749	0.0514	1.0147	0.0221	0.0041	0.0066
FEV1_meta	Cholesterol esters in medium LDL	27005778	metabolites	European	SNPs from the MHC (chr6 26M~34M) region was removed for this traits	-0.0361	0.0659	-0.5469	0.5845	0.0809	0.0497	1.01	0.0208	0.0036	0.0064
FEV1_meta	Total cholesterol in small LDL	27005778	metabolites	European	SNPs from the MHC (chr6 26M~34M) region was removed for this traits	-0.0372	0.0681	-0.546	0.585	0.0696	0.0439	1.0166	0.0192	-0.0007	0.0065
FEV1_meta	Total lipids in medium LDL	27005778	metabolites	European	SNPs from the MHC (chr6 26M~34M) region was removed for this traits	-0.0358	0.0655	-0.5456	0.5853	0.0815	0.05	1.01	0.0208	0.0021	0.0066
FEV1_meta	Total lipids in IDL	27005778	metabolites	European	SNPs from the MHC (chr6 26M~34M) region was removed for this traits	-0.0375	0.0704	-0.5328	0.5942	0.0733	0.0444	1.0194	0.0188	0.004	0.0066
FEV1_meta	Free cholesterol in medium HDL	27005778	metabolites	European	SNPs from the MHC (chr6 26M~34M) region was removed for this traits	0.0313	0.0598	0.5227	0.6012	0.065	0.0233	0.9986	0.0082	0.0078	0.0056
FEV1_meta	Autism spectrum disorder	0	psychiatric	European	SNPs from the MHC (chr6 26M~34M) region was removed for this traits	-0.0185	0.036	-0.5142	0.6071	0.4521	0.0518	0.9665	0.0066	0.0047	0.0063
FEV1_meta	Total cholesterol in medium LDL	27005778	metabolites	European	SNPs from the MHC (chr6 26M~34M) region was removed for this traits	-0.0341	0.0664	-0.5138	0.6074	0.069	0.047	1.013	0.022	0.0053	0.0064
FEV1_meta	Rheumatoid Arthritis	24390342	autoimmune	European	SNPs from the MHC (chr6 26M~34M) region was removed for this traits	-0.0126	0.0246	-0.5123	0.6085	0.1597	0.0287	1.0236	0.0162	-0.0081	0.0061
FEV1_meta	Average number of double bonds in a fatty acid chain	27005778	metabolites	European	SNPs from the MHC (chr6 26M~34M) region was removed for this traits	0.023	0.045	0.5112	0.6092	0.1719	0.0531	1.0016	0.0077	0.0111	0.0061
FEV1_meta	Ferritin	25352340	metal	European	SNPs from the MHC (chr6 26M~34M) region was removed for this traits	-0.0308	0.0632	-0.4878	0.6257	0.0917	0.0265	1.0278	0.0092	-0.0083	0.0085
FEV1_meta	Sleep duration	27494321	sleeping	European	SNPs from the MHC (chr6 26M~34M) region was removed for this traits	-0.0147	0.0311	-0.4741	0.6354	0.0553	0.0049	1.0201	0.0073	-0.0032	0.0061
FEV1_meta	Total cholesterol in IDL	27005778	metabolites	European	SNPs from the MHC (chr6 26M~34M) region was removed for this traits	-0.033	0.0705	-0.4684	0.6395	0.0709	0.0457	1.019	0.0198	0.0051	0.0065
FEV1_meta	Total lipids in small LDL	27005778	metabolites	European	SNPs from the MHC (chr6 26M~34M) region was removed for this traits	-0.0276	0.0623	-0.444	0.6571	0.0862	0.0456	1.0083	0.0177	-0.0002	0.0067
FEV1_meta	Concentration of small LDL particles	27005778	metabolites	European	SNPs from the MHC (chr6 26M~34M) region was removed for this traits	-0.0253	0.0591	-0.4289	0.668	0.0936	0.0435	1.0074	0.0159	-0.0008	0.0067
FEV1_meta	Total cholesterol in LDL	27005778	metabolites	European	SNPs from the MHC (chr6 26M~34M) region was removed for this traits	-0.0289	0.0685	-0.422	0.673	0.0686	0.0507	1.014	0.0238	0.0037	0.0066
FEV1_meta	Neo-openness to experience	21173776	personality	European	SNPs from the MHC (chr6 26M~34M) region was removed for this traits	-0.0212	0.0574	-0.3691	0.712	0.1056	0.0271	0.9918	0.0066	0.0127	0.0069
FEV1_meta	Free cholesterol in large LDL	27005778	metabolites	European	SNPs from the MHC (chr6 26M~34M) region was removed for this traits	0.0212	0.0663	0.3204	0.7486	0.0634	0.0482	1.0174	0.0235	0.0045	0.0064
FEV1_meta	Free cholesterol in IDL	27005778	metabolites	European	SNPs from the MHC (chr6 26M~34M) region was removed for this traits	0.0149	0.0663	0.2245	0.8223	0.0699	0.0414	1.0207	0.0199	0.0023	0.0068
FEV1_meta	Mean Pallidum	25607358	brain_volume	European	SNPs from the MHC (chr6 26M~34M) region was removed for this traits	-0.0116	0.0523	-0.2216	0.8246	0.16	0.0411	0.978	0.0069	-0.0037	0.0059
FEV1_meta	Systemic lupus erythematosus	26502338	autoimmune	European	SNPs from the MHC (chr6 26M~34M) region was removed for this traits	-0.0074	0.0399	-0.1853	0.853	0.3866	0.0667	1.1067	0.0098	0.0015	0.0073
FEV1_meta	Ulcerative colitis	26192919	autoimmune	European	SNPs from the MHC (chr6 26M~34M) region was removed for this traits	-0.0047	0.0311	-0.1497	0.881	0.2579	0.0315	1.0476	0.0096	-0.0063	0.0059
FEV1_meta	Phospholipids in large LDL	27005778	metabolites	European	SNPs from the MHC (chr6 26M~34M) region was removed for this traits	-0.0093	0.0679	-0.1373	0.8908	0.0622	0.0447	1.0177	0.0213	0.0054	0.0064
FEV1_meta	Bipolar disorder	21926972	psychiatric	European	SNPs from the MHC (chr6 26M~34M) region was removed for this traits	0.0039	0.029	0.1332	0.8941	0.4352	0.0369	1.0217	0.0073	-0.0055	0.0065
FEV1_meta	Phospholipids in medium HDL	27005778	metabolites	European	SNPs from the MHC (chr6 26M~34M) region was removed for this traits	0.0065	0.0564	0.1159	0.9077	0.0655	0.0233	0.9958	0.0076	0.004	0.0055
FEV1_meta	Mean platelet volume	22139419	haemotological	European	SNPs from the MHC (chr6 26M~34M) region was removed for this traits	-0.0027	0.0336	-0.0805	0.9358	0.3201	0.0509	0.9813	0.0107	-0.0012	0.0071
FEV1_meta	Phospholipids in IDL	27005778	metabolites	European	SNPs from the MHC (chr6 26M~34M) region was removed for this traits	-0.0036	0.0728	-0.0492	0.9608	0.06	0.0416	1.0217	0.0193	0.0015	0.0067
FEV1_meta	Total cholesterol in large LDL	27005778	metabolites	European	SNPs from the MHC (chr6 26M~34M) region was removed for this traits	-0.0015	0.0657	-0.0223	0.9822	0.0652	0.0467	1.0151	0.0226	0.0051	0.0063

## Sheet: ST1b
Supplementary File 1b: Genetic correlations between FVC and 172 GWAS from the LDhub library
Trait1	Trait2	PMID	Category	Ethnicity	Note	rg	se	z	p	h2_obs	h2_obs_se	h2_int	h2_int_se	gcov_int	gcov_int_se
FVC	Waist circumference	25673412	anthropometric	European	SNPs from the MHC (chr6 26M~34M) region was removed for this traits	-0.2441	0.0205	-11.918	9.54e-33	0.121	0.0051	0.8457	0.0075	-0.0024	0.0069
FVC	Waist-to-hip ratio	25673412	anthropometric	European	SNPs from the MHC (chr6 26M~34M) region was removed for this traits	-0.2269	0.021	-10.7996	3.46e-27	0.1129	0.0069	0.9212	0.0088	-0.0082	0.0068
FVC	Hip circumference	25673412	anthropometric	European	SNPs from the MHC (chr6 26M~34M) region was removed for this traits	-0.1955	0.0227	-8.6327	5.99e-18	0.1273	0.0058	0.8607	0.0081	0.003	0.0071
FVC	Obesity class 2	23563607	anthropometric	European	SNPs from the MHC (chr6 26M~34M) region was removed for this traits	-0.2348	0.0274	-8.5643	1.09e-17	0.1845	0.0123	1.002	0.0098	0.022	0.0086
FVC	Obesity class 1	23563607	anthropometric	European	SNPs from the MHC (chr6 26M~34M) region was removed for this traits	-0.1786	0.022	-8.1318	4.23e-16	0.2173	0.0116	1.018	0.0111	0.0142	0.0079
FVC	Fasting insulin main effect	22581228	glycemic	European	SNPs from the MHC (chr6 26M~34M) region was removed for this traits	-0.3051	0.0407	-7.4882	6.98e-14	0.0695	0.0101	1.016	0.0069	0.0017	0.0055
FVC	Overweight	23563607	anthropometric	European	SNPs from the MHC (chr6 26M~34M) region was removed for this traits	-0.1597	0.022	-7.25	4.17e-13	0.1096	0.0065	1.0245	0.0095	0.0051	0.0074
FVC	Type 2 Diabetes	22885922	glycemic	European	SNPs from the MHC (chr6 26M~34M) region was removed for this traits	-0.2444	0.0348	-7.0245	2.15e-12	0.0882	0.0093	1.0076	0.007	0.0046	0.0066
FVC	Leptin_not_adjBMI	26833098	hormone	European	SNPs from the MHC (chr6 26M~34M) region was removed for this traits	-0.3309	0.0474	-6.9849	2.85e-12	0.0997	0.016	0.994	0.0065	-0.007	0.0064
FVC	Body mass index	20935630	anthropometric	European	SNPs from the MHC (chr6 26M~34M) region was removed for this traits	-0.1502	0.0216	-6.9459	3.76e-12	0.1899	0.0096	1.0102	0.0105	0.0089	0.007
FVC	Years of schooling 2016	27225129	education	European	SNPs from the MHC (chr6 26M~34M) region was removed for this traits	0.1076	0.0157	6.859	6.93e-12	0.127	0.0044	0.9271	0.0101	0.0273	0.0066
FVC	College completion	23722424	education	European	SNPs from the MHC (chr6 26M~34M) region was removed for this traits	0.1806	0.0264	6.8466	7.56e-12	0.0793	0.0058	1.0211	0.0087	-0.0126	0.0067
FVC	Extreme bmi	23563607	anthropometric	European	SNPs from the MHC (chr6 26M~34M) region was removed for this traits	-0.2131	0.0313	-6.798	1.06e-11	0.6923	0.0547	1.0299	0.0112	0.023	0.0096
FVC	Obesity class 3	23563607	anthropometric	European	SNPs from the MHC (chr6 26M~34M) region was removed for this traits	-0.2437	0.0394	-6.1788	6.46e-10	0.122	0.0141	0.9797	0.0091	0.0151	0.0084
FVC	HOMA-IR	20081858	glycemic	European	SNPs from the MHC (chr6 26M~34M) region was removed for this traits	-0.2926	0.0484	-6.0422	1.52e-09	0.0684	0.0124	1.0032	0.0065	0.0019	0.0062
FVC	Leptin_adjBMI	26833098	hormone	European	SNPs from the MHC (chr6 26M~34M) region was removed for this traits	-0.2682	0.0471	-5.6984	1.21e-08	0.0956	0.0175	1.0031	0.007	-0.0131	0.0062
FVC	Age of first birth	27798627	reproductive	European	SNPs from the MHC (chr6 26M~34M) region was removed for this traits	0.1198	0.0222	5.4045	6.5e-08	0.0628	0.0035	0.9518	0.008	0.0052	0.006
FVC	Urate	23263486	other	European	SNPs from the MHC (chr6 26M~34M) region was removed for this traits	-0.1156	0.0236	-4.9009	9.54e-07	0.176	0.0583	0.9534	0.049	0.0001	0.0071
FVC	HDL cholesterol	20686565	lipids	European	SNPs from the MHC (chr6 26M~34M) region was removed for this traits	0.1409	0.0288	4.8922	9.97e-07	0.1272	0.0229	1.0581	0.0494	-0.0061	0.007
FVC	Free Cholesterol L-HDL	27005778	metabolites	European	SNPs from the MHC (chr6 26M~34M) region was removed for this traits	0.2218	0.0508	4.3703	1.24e-05	0.1056	0.0284	1.0086	0.0141	-0.0019	0.0058
FVC	Extreme waist-to-hip ratio	23563607	anthropometric	European	SNPs from the MHC (chr6 26M~34M) region was removed for this traits	-0.1909	0.0438	-4.3561	1.32e-05	0.3606	0.057	0.9771	0.0084	-0.0123	0.0083
FVC	Triglycerides	20686565	lipids	European	SNPs from the MHC (chr6 26M~34M) region was removed for this traits	-0.1107	0.0256	-4.3245	1.53e-05	0.1679	0.0288	0.9684	0.0162	-0.0026	0.0068
FVC	Fathers age at death	27015805	aging	European	SNPs from the MHC (chr6 26M~34M) region was removed for this traits	0.1813	0.0428	4.2379	2.26e-05	0.04	0.0069	1.0177	0.0069	0.0091	0.0056
FVC	Sitting height ratio	25865494	anthropometric	European	SNPs from the MHC (chr6 26M~34M) region was removed for this traits	0.193	0.046	4.1919	2.77e-05	0.222	0.0282	0.9798	0.0076	0.011	0.0076
FVC	Mean diameter for HDL particles	27005778	metabolites	European	SNPs from the MHC (chr6 26M~34M) region was removed for this traits	0.2156	0.0519	4.1579	3.21e-05	0.1185	0.0301	1.0088	0.0188	-0.0069	0.0059
FVC	Phospholipids VL-HDL	27005778	metabolites	European	SNPs from the MHC (chr6 26M~34M) region was removed for this traits	0.2423	0.0591	4.1011	4.11e-05	0.0906	0.0301	1.0082	0.0167	-0.0085	0.0056
FVC	Total cholesterol L-HDL	27005778	metabolites	European	SNPs from the MHC (chr6 26M~34M) region was removed for this traits	0.2125	0.0531	4.0011	6.3e-05	0.1042	0.0286	1.0069	0.0143	-0.0021	0.0058
FVC	Total lipids in large HDL	27005778	metabolites	European	SNPs from the MHC (chr6 26M~34M) region was removed for this traits	0.1884	0.0476	3.9584	7.55e-05	0.1299	0.0308	1.0009	0.0148	-0.0009	0.0058
FVC	Concentration of L-HDL particles	27005778	metabolites	European	SNPs from the MHC (chr6 26M~34M) region was removed for this traits	0.1843	0.0466	3.9514	7.77e-05	0.1318	0.0303	0.9997	0.0151	-0.0005	0.0057
FVC	Fasting glucose main effect	22581228	glycemic	European	SNPs from the MHC (chr6 26M~34M) region was removed for this traits	-0.1242	0.0319	-3.8896	0.0001	0.0985	0.0189	0.9981	0.0094	0.0016	0.0063
FVC	Phospholipids in L-HDL	27005778	metabolites	European	SNPs from the MHC (chr6 26M~34M) region was removed for this traits	0.1815	0.0476	3.8136	0.0001	0.1263	0.0302	0.9986	0.014	0.0006	0.0057
FVC	Anorexia Nervosa	24514567	psychiatric	European	SNPs from the MHC (chr6 26M~34M) region was removed for this traits	0.1026	0.0274	3.7507	0.0002	0.5574	0.0312	0.8981	0.0071	-0.0025	0.0067
FVC	Cholesterol esters in large HDL	27005778	metabolites	European	SNPs from the MHC (chr6 26M~34M) region was removed for this traits	0.1917	0.0512	3.7434	0.0002	0.1226	0.0311	1.001	0.0142	-0.002	0.0058
FVC	Cigarettes smoked per day	20418890	smoking_behaviour	European	SNPs from the MHC (chr6 26M~34M) region was removed for this traits	-0.1966	0.0518	-3.791	0.0002	0.0602	0.015	1.0045	0.006	0.0087	0.0061
FVC	HOMA-B	20081858	glycemic	European	SNPs from the MHC (chr6 26M~34M) region was removed for this traits	-0.1528	0.0406	-3.7659	0.0002	0.0909	0.0135	0.9887	0.0063	0.0002	0.0058
FVC	Birth weight	27680694	anthropometric	European	SNPs from the MHC (chr6 26M~34M) region was removed for this traits	0.0872	0.0238	3.6621	0.0003	0.1023	0.0066	1.042	0.0098	0.0089	0.0064
FVC	Age at Menarche	25231870	reproductive	European	SNPs from the MHC (chr6 26M~34M) region was removed for this traits	0.0673	0.0189	3.5543	0.0004	0.2018	0.0099	0.9541	0.0117	0.0101	0.0069
FVC	Difference in height between adolescence and adulthood; age 14	23449627	anthropometric	European	SNPs from the MHC (chr6 26M~34M) region was removed for this traits	0.1867	0.0536	3.481	0.0005	0.4536	0.1104	0.9813	0.0067	-0.0125	0.0063
FVC	Glycoprotein acetyls; mainly a1-acid glycoprotein	27005778	metabolites	European	SNPs from the MHC (chr6 26M~34M) region was removed for this traits	-0.1793	0.0527	-3.4	0.0007	0.1022	0.0289	0.9849	0.0063	-0.011	0.0056
FVC	Urinary albumin-to-creatinine ratio	26631737	kidney	European	SNPs from the MHC (chr6 26M~34M) region was removed for this traits	-0.1772	0.0522	-3.3918	0.0007	0.0456	0.0088	0.9962	0.0068	-0.0033	0.007
FVC	Total cholesterol in HDL	27005778	metabolites	European	SNPs from the MHC (chr6 26M~34M) region was removed for this traits	0.1668	0.0499	3.346	0.0008	0.0926	0.0283	1.007	0.0128	0.0019	0.0057
FVC	Asthma	17611496	autoimmune	European	SNPs from the MHC (chr6 26M~34M) region was removed for this traits	-0.1781	0.0543	-3.2802	0.001	0.1211	0.0266	1.0083	0.0082	-0.0064	0.0073
FVC	Own birth weight	31043758	anthropometric	European	SNPs from the MHC (chr6 26M~34M) region was removed for this traits	0.068	0.0213	3.1935	0.0014	0.0988	0.0054	1.0811	0.0156	0.0133	0.0072
FVC	Mothers age at death	27015805	aging	European	SNPs from the MHC (chr6 26M~34M) region was removed for this traits	0.1605	0.0505	3.1798	0.0015	0.0355	0.0075	1.0133	0.0072	0.0204	0.0061
FVC	Concentration of medium VLDL particles	27005778	metabolites	European	SNPs from the MHC (chr6 26M~34M) region was removed for this traits	-0.1453	0.0461	-3.1499	0.0016	0.1497	0.0354	0.9808	0.0068	0.0011	0.0062
FVC	Intelligence	28530673	cognitive	European	SNPs from the MHC (chr6 26M~34M) region was removed for this traits	0.0714	0.0226	3.1609	0.0016	0.1885	0.0104	1.01	0.0081	0.0171	0.0064
FVC	Childhood IQ	23358156	education	European	SNPs from the MHC (chr6 26M~34M) region was removed for this traits	0.1509	0.0481	3.1382	0.0017	0.2747	0.0452	1.0019	0.0093	-0.0047	0.0086
FVC	Valine	27005778	metabolites	European	SNPs from the MHC (chr6 26M~34M) region was removed for this traits	-0.2293	0.0746	-3.0751	0.0021	0.0606	0.0194	1.0157	0.0074	0.0047	0.0058
FVC	Ever vs never smoked	20418890	smoking_behaviour	European	SNPs from the MHC (chr6 26M~34M) region was removed for this traits	-0.1017	0.0337	-3.0227	0.0025	0.0746	0.0065	0.9976	0.006	0.0113	0.0058
FVC	Chronotype	27494321	sleeping	European	SNPs from the MHC (chr6 26M~34M) region was removed for this traits	-0.0721	0.0241	-2.9978	0.0027	0.101	0.0058	1.0149	0.0076	0.0146	0.006
FVC	Former vs Current smoker	20418890	smoking_behaviour	European	SNPs from the MHC (chr6 26M~34M) region was removed for this traits	0.1468	0.0489	3.0033	0.0027	0.0629	0.0104	1.0007	0.0067	-0.0034	0.0059
FVC	Concentration of large VLDL particles	27005778	metabolites	European	SNPs from the MHC (chr6 26M~34M) region was removed for this traits	-0.153	0.0512	-2.9883	0.0028	0.132	0.0344	0.9741	0.0068	0.0012	0.0058
FVC	Total lipids in large VLDL	27005778	metabolites	European	SNPs from the MHC (chr6 26M~34M) region was removed for this traits	-0.1431	0.0478	-2.9927	0.0028	0.1401	0.03	0.9851	0.0063	-0.0002	0.006
FVC	Lung cancer	27488534	cancer	European	SNPs from the MHC (chr6 26M~34M) region was removed for this traits	-0.1046	0.0354	-2.9565	0.0031	0.317	0.0679	1.0142	0.0073	0.0071	0.0055
FVC	Triglycerides in small VLDL	27005778	metabolites	European	SNPs from the MHC (chr6 26M~34M) region was removed for this traits	-0.1473	0.0512	-2.8777	0.004	0.1205	0.0349	0.9941	0.0073	0.0018	0.006
FVC	Total lipids in medium VLDL	27005778	metabolites	European	SNPs from the MHC (chr6 26M~34M) region was removed for this traits	-0.1375	0.0479	-2.8676	0.0041	0.1411	0.0342	0.9856	0.0066	0.0012	0.006
FVC	Concentration of small VLDL particles	27005778	metabolites	European	SNPs from the MHC (chr6 26M~34M) region was removed for this traits	-0.1354	0.0474	-2.8547	0.0043	0.1516	0.0372	0.9899	0.0078	0.002	0.0063
FVC	Total lipids in small VLDL	27005778	metabolites	European	SNPs from the MHC (chr6 26M~34M) region was removed for this traits	-0.1394	0.049	-2.8462	0.0044	0.146	0.0373	0.9914	0.0081	0.0022	0.0062
FVC	Platelet count	22139419	haemotological	European	SNPs from the MHC (chr6 26M~34M) region was removed for this traits	-0.0778	0.0275	-2.8246	0.0047	0.1206	0.0114	0.9841	0.0081	0.0075	0.0061
FVC	Childhood obesity	22484627	anthropometric	European	SNPs from the MHC (chr6 26M~34M) region was removed for this traits	-0.0903	0.0321	-2.8127	0.0049	0.4129	0.0461	0.9266	0.0075	0.0123	0.0061
FVC	Triglycerides in large VLDL	27005778	metabolites	European	SNPs from the MHC (chr6 26M~34M) region was removed for this traits	-0.1469	0.0524	-2.8069	0.005	0.1128	0.0286	0.9885	0.0063	-0.0014	0.0058
FVC	Isoleucine	27005778	metabolites	European	SNPs from the MHC (chr6 26M~34M) region was removed for this traits	-0.1911	0.0682	-2.8006	0.0051	0.072	0.0234	0.9943	0.0066	-0.0038	0.0058
FVC	Serum total triglycerides	27005778	metabolites	European	SNPs from the MHC (chr6 26M~34M) region was removed for this traits	-0.146	0.0523	-2.7904	0.0053	0.1259	0.0355	0.992	0.0075	-0.0009	0.0064
FVC	Primary biliary cirrhosis	26394269	autoimmune	European	SNPs from the MHC (chr6 26M~34M) region was removed for this traits	-0.1311	0.0475	-2.7582	0.0058	0.375	0.0635	1.0039	0.0098	0.0072	0.0085
FVC	Mean diameter for VLDL particles	27005778	metabolites	European	SNPs from the MHC (chr6 26M~34M) region was removed for this traits	-0.1312	0.0482	-2.725	0.0064	0.1339	0.0348	0.9904	0.0085	0.0004	0.0054
FVC	Free cholesterol in small VLDL	27005778	metabolites	European	SNPs from the MHC (chr6 26M~34M) region was removed for this traits	-0.1444	0.0533	-2.7073	0.0068	0.1127	0.0336	0.9998	0.0087	0.0019	0.0061
FVC	Urinary albumin-to-creatinine ratio (non-diabetes)	26631737	kidney	European	SNPs from the MHC (chr6 26M~34M) region was removed for this traits	-0.149	0.0563	-2.6455	0.0082	0.0534	0.0107	0.9949	0.0073	-0.001	0.007
FVC	Concentration of chylomicrons and largest VLDL particles	27005778	metabolites	European	SNPs from the MHC (chr6 26M~34M) region was removed for this traits	-0.1328	0.0505	-2.6312	0.0085	0.1168	0.0266	0.9882	0.0064	0.0003	0.0059
FVC	Cholesterol esters in large VLDL	27005778	metabolites	European	SNPs from the MHC (chr6 26M~34M) region was removed for this traits	-0.1134	0.0432	-2.6232	0.0087	0.1648	0.0343	0.9777	0.0069	-0.0046	0.0059
FVC	Cholesterol esters in medium VLDL	27005778	metabolites	European	SNPs from the MHC (chr6 26M~34M) region was removed for this traits	-0.1204	0.0463	-2.6016	0.0093	0.1529	0.0374	0.986	0.0079	-0.0009	0.0062
FVC	Phospholipids in small VLDL	27005778	metabolites	European	SNPs from the MHC (chr6 26M~34M) region was removed for this traits	-0.1328	0.0512	-2.5952	0.0095	0.1178	0.035	0.9981	0.0084	0.0007	0.0061
FVC	Child birth length	25281659	anthropometric	European	SNPs from the MHC (chr6 26M~34M) region was removed for this traits	0.1042	0.0404	2.5785	0.0099	0.1704	0.0233	0.9924	0.0072	-0.0062	0.0067
FVC	Lung cancer (all)	24880342	cancer	European	SNPs from the MHC (chr6 26M~34M) region was removed for this traits	-0.1056	0.0415	-2.5408	0.0111	0.1294	0.0295	1.007	0.008	0.005	0.0063
FVC	Total cholesterol in medium VLDL	27005778	metabolites	European	SNPs from the MHC (chr6 26M~34M) region was removed for this traits	-0.1221	0.0484	-2.5232	0.0116	0.1258	0.0351	0.992	0.0075	-0.0012	0.006
FVC	Triglycerides in medium VLDL	27005778	metabolites	European	SNPs from the MHC (chr6 26M~34M) region was removed for this traits	-0.143	0.0567	-2.5222	0.0117	0.0972	0.03	0.9989	0.0065	0.0009	0.0058
FVC	Total lipids in very large VLDL	27005778	metabolites	European	SNPs from the MHC (chr6 26M~34M) region was removed for this traits	-0.125	0.0504	-2.4824	0.013	0.1371	0.03	0.9783	0.0071	-0.0018	0.0059
FVC	Free cholesterol in medium VLDL	27005778	metabolites	European	SNPs from the MHC (chr6 26M~34M) region was removed for this traits	-0.1313	0.053	-2.4801	0.0131	0.1121	0.0331	0.9956	0.007	-0.0002	0.006
FVC	Phospholipids in large VLDL	27005778	metabolites	European	SNPs from the MHC (chr6 26M~34M) region was removed for this traits	-0.1282	0.0517	-2.4799	0.0131	0.1171	0.0304	0.9893	0.0064	-0.0034	0.006
FVC	Squamous cell lung cancer	27488534	cancer	European	SNPs from the MHC (chr6 26M~34M) region was removed for this traits	-0.1468	0.0592	-2.4801	0.0131	0.039	0.0122	1.0105	0.0066	0.0062	0.0062
FVC	Phospholipids in medium VLDL	27005778	metabolites	European	SNPs from the MHC (chr6 26M~34M) region was removed for this traits	-0.1335	0.0539	-2.4774	0.0132	0.1112	0.0329	0.9968	0.0069	5.18e-05	0.006
FVC	Triglycerides in very small VLDL	27005778	metabolites	European	SNPs from the MHC (chr6 26M~34M) region was removed for this traits	-0.1239	0.0501	-2.4738	0.0134	0.14	0.0364	0.9979	0.0096	0.0035	0.0065
FVC	Citrate	27005778	metabolites	European	SNPs from the MHC (chr6 26M~34M) region was removed for this traits	0.1497	0.0613	2.4415	0.0146	0.0704	0.0208	1.0122	0.0076	-0.0075	0.0059
FVC	Triglycerides in very large VLDL	27005778	metabolites	European	SNPs from the MHC (chr6 26M~34M) region was removed for this traits	-0.127	0.0521	-2.4406	0.0147	0.1183	0.0294	0.9816	0.007	-0.004	0.0057
FVC	Own birth weight (fetal effect)	adjusted for maternal genotype	anthropometric	European	SNPs from the MHC (chr6 26M~34M) region was removed for this traits	0.0681	0.0279	2.4366	0.0148	0.0302	0.0029	1.0362	0.0088	0.0093	0.006
FVC	Phospholipids in very large VLDL	27005778	metabolites	European	SNPs from the MHC (chr6 26M~34M) region was removed for this traits	-0.1329	0.055	-2.4152	0.0157	0.1072	0.0278	0.9853	0.0067	-0.0028	0.0059
FVC	Glutamine	27005778	metabolites	European	SNPs from the MHC (chr6 26M~34M) region was removed for this traits	0.1567	0.0652	2.4043	0.0162	0.0618	0.0205	1.0187	0.0077	-0.0026	0.0056
FVC	Triglycerides in chylomicrons and largest VLDL particles	27005778	metabolites	European	SNPs from the MHC (chr6 26M~34M) region was removed for this traits	-0.1471	0.0616	-2.3871	0.017	0.0911	0.0271	0.9907	0.0065	-0.0087	0.0062
FVC	Celiac disease	20190752	autoimmune	European	SNPs from the MHC (chr6 26M~34M) region was removed for this traits	0.098	0.0426	2.3008	0.0214	0.3086	0.049	1.0649	0.0108	-0.0241	0.0088
FVC	Concentration of very large VLDL particles	27005778	metabolites	European	SNPs from the MHC (chr6 26M~34M) region was removed for this traits	-0.1111	0.0484	-2.2944	0.0218	0.1254	0.0296	0.9834	0.0067	-0.0056	0.0057
FVC	Offspring birth weight (maternal effect)	adjusted for offspring genotype	anthropometric	European	SNPs from the MHC (chr6 26M~34M) region was removed for this traits	0.0541	0.0236	2.2942	0.0218	0.1047	0.0059	1.0495	0.0124	0.0002	0.0072
FVC	Parents age at death	27015805	aging	European	SNPs from the MHC (chr6 26M~34M) region was removed for this traits	0.1215	0.0544	2.2341	0.0255	0.0289	0.0069	1.016	0.0063	0.0236	0.0065
FVC	Total cholesterol in small VLDL	27005778	metabolites	European	SNPs from the MHC (chr6 26M~34M) region was removed for this traits	-0.1332	0.0596	-2.2344	0.0255	0.0921	0.0321	1.005	0.0097	0.0012	0.0059
FVC	Total lipids in chylomicrons and largest VLDL particles	27005778	metabolites	European	SNPs from the MHC (chr6 26M~34M) region was removed for this traits	-0.1181	0.0531	-2.2228	0.0262	0.1202	0.0277	0.9898	0.0067	-0.0026	0.0062
FVC	Phospholipids in chylomicrons and largest VLDL particles	27005778	metabolites	European	SNPs from the MHC (chr6 26M~34M) region was removed for this traits	-0.1246	0.0567	-2.1965	0.0281	0.0976	0.0265	0.9848	0.0067	-0.0044	0.0062
FVC	Free cholesterol in large VLDL	27005778	metabolites	European	SNPs from the MHC (chr6 26M~34M) region was removed for this traits	-0.1123	0.0515	-2.1798	0.0293	0.1235	0.0297	0.9887	0.0067	-0.0023	0.006
FVC	Depressive symptoms	27089181	psychiatric	European	SNPs from the MHC (chr6 26M~34M) region was removed for this traits	-0.0671	0.0312	-2.1498	0.0316	0.0475	0.0037	1.0001	0.0071	-0.0157	0.0061
FVC	Total cholesterol in large VLDL	27005778	metabolites	European	SNPs from the MHC (chr6 26M~34M) region was removed for this traits	-0.1141	0.0532	-2.1429	0.0321	0.1174	0.0286	0.9915	0.0067	-0.0014	0.0061
FVC	Child birth weight	23202124	anthropometric	European	SNPs from the MHC (chr6 26M~34M) region was removed for this traits	0.0759	0.0365	2.0817	0.0374	0.1111	0.018	1.0051	0.0058	0.0013	0.0053
FVC	Crohns disease	26192919	autoimmune	European	SNPs from the MHC (chr6 26M~34M) region was removed for this traits	-0.058	0.0279	-2.0818	0.0374	0.5024	0.0577	1.0231	0.0116	-0.0045	0.0066
FVC	Apolipoprotein B	27005778	metabolites	European	SNPs from the MHC (chr6 26M~34M) region was removed for this traits	-0.1611	0.0787	-2.046	0.0408	0.0835	0.04	1.0086	0.0147	0.0042	0.0067
FVC	LDL cholesterol	20686565	lipids	European	SNPs from the MHC (chr6 26M~34M) region was removed for this traits	-0.0637	0.0314	-2.0257	0.0428	0.1041	0.0284	1.0514	0.0483	0.0103	0.0072
FVC	HbA1C	20858683	glycemic	European	SNPs from the MHC (chr6 26M~34M) region was removed for this traits	-0.0721	0.036	-2.0047	0.045	0.0654	0.0117	0.999	0.0071	-0.0091	0.005
FVC	Height_2010	20881960	anthropometric	European	SNPs from the MHC (chr6 26M~34M) region was removed for this traits	-0.0462	0.0243	-1.8998	0.0575	0.2856	0.0164	1.0182	0.0185	0.0056	0.0094
FVC	Creatinine	27005778	metabolites	European	SNPs from the MHC (chr6 26M~34M) region was removed for this traits	0.0769	0.0432	1.7779	0.0754	0.1158	0.0247	1.0116	0.0072	0.004	0.0063
FVC	Triglycerides in IDL	27005778	metabolites	European	SNPs from the MHC (chr6 26M~34M) region was removed for this traits	-0.1042	0.0587	-1.7742	0.076	0.1084	0.0345	1.0103	0.0149	0.0022	0.0066
FVC	Insomnia	28604731	sleeping	European	SNPs from the MHC (chr6 26M~34M) region was removed for this traits	-0.0631	0.0357	-1.7668	0.0773	0.0475	0.0049	1.0031	0.007	-0.0109	0.0063
FVC	Neuroticism	27089181	personality	European	SNPs from the MHC (chr6 26M~34M) region was removed for this traits	-0.0424	0.0248	-1.7131	0.0867	0.0892	0.0074	0.9902	0.0117	-0.0085	0.0066
FVC	Height; Females at age 10 and males at age 12	23449627	anthropometric	European	SNPs from the MHC (chr6 26M~34M) region was removed for this traits	-0.0603	0.0354	-1.7013	0.0889	0.4303	0.0479	0.9526	0.0079	0.0083	0.0075
FVC	Concentration of very small VLDL particles	27005778	metabolites	European	SNPs from the MHC (chr6 26M~34M) region was removed for this traits	-0.0935	0.0552	-1.6957	0.0899	0.1174	0.0357	1.005	0.0122	0.0017	0.0065
FVC	Excessive daytime sleepiness	27992416	sleeping	European	SNPs from the MHC (chr6 26M~34M) region was removed for this traits	-0.0588	0.0347	-1.6941	0.0903	0.0538	0.0052	1.0034	0.0068	-0.0199	0.006
FVC	Apolipoprotein A-I	27005778	metabolites	European	SNPs from the MHC (chr6 26M~34M) region was removed for this traits	0.0963	0.0573	1.6812	0.0927	0.0717	0.0307	1.0058	0.0118	0.006	0.0058
FVC	Total lipids in very small VLDL	27005778	metabolites	European	SNPs from the MHC (chr6 26M~34M) region was removed for this traits	-0.0932	0.0583	-1.5992	0.1098	0.1074	0.036	1.0096	0.0126	0.0025	0.0063
FVC	Age at Menopause	26414677	reproductive	European	SNPs from the MHC (chr6 26M~34M) region was removed for this traits	0.0417	0.0271	1.5393	0.1237	0.1359	0.0159	0.9895	0.0138	-0.0024	0.0067
FVC	Major depressive disorder	22472876	psychiatric	European	SNPs from the MHC (chr6 26M~34M) region was removed for this traits	-0.0669	0.0445	-1.5031	0.1328	0.1716	0.0255	1.0052	0.006	0.0011	0.0062
FVC	18:2 linoleic acid (LA)	27005778	metabolites	European	SNPs from the MHC (chr6 26M~34M) region was removed for this traits	0.0888	0.0594	1.4943	0.1351	0.1285	0.0482	1.0028	0.0098	-0.0109	0.0059
FVC	Phospholipids in medium LDL	27005778	metabolites	European	SNPs from the MHC (chr6 26M~34M) region was removed for this traits	-0.113	0.076	-1.4867	0.1371	0.0729	0.0427	1.0086	0.0192	0.0068	0.0064
FVC	Concentration of small LDL particles	27005778	metabolites	European	SNPs from the MHC (chr6 26M~34M) region was removed for this traits	-0.0996	0.0694	-1.4349	0.1513	0.0939	0.0435	1.0072	0.0159	0.0028	0.0066
FVC	Concentration of medium LDL particles	27005778	metabolites	European	SNPs from the MHC (chr6 26M~34M) region was removed for this traits	-0.112	0.0803	-1.3948	0.1631	0.08	0.0486	1.0117	0.0201	0.0045	0.0065
FVC	Total lipids in small LDL	27005778	metabolites	European	SNPs from the MHC (chr6 26M~34M) region was removed for this traits	-0.1033	0.0744	-1.3886	0.165	0.0865	0.0456	1.0082	0.0176	0.0026	0.0066
FVC	Free cholesterol in medium HDL	27005778	metabolites	European	SNPs from the MHC (chr6 26M~34M) region was removed for this traits	0.076	0.0549	1.3844	0.1662	0.0649	0.0232	0.9987	0.0082	0.0072	0.0055
FVC	Total cholesterol in small LDL	27005778	metabolites	European	SNPs from the MHC (chr6 26M~34M) region was removed for this traits	-0.1151	0.0831	-1.3845	0.1662	0.0698	0.0438	1.0165	0.0191	0.0023	0.0064
FVC	Mean Putamen	25607358	brain_volume	European	SNPs from the MHC (chr6 26M~34M) region was removed for this traits	0.0543	0.0393	1.3837	0.1664	0.2984	0.0461	0.9501	0.0068	-0.0108	0.0058
FVC	Mean Caudate	25607358	brain_volume	European	SNPs from the MHC (chr6 26M~34M) region was removed for this traits	0.0595	0.0431	1.3796	0.1677	0.249	0.0387	0.9687	0.006	-0.0066	0.0063
FVC	Cholesterol esters in medium LDL	27005778	metabolites	European	SNPs from the MHC (chr6 26M~34M) region was removed for this traits	-0.1054	0.0797	-1.3225	0.186	0.081	0.0496	1.01	0.0207	0.0055	0.0064
FVC	Total lipids in medium LDL	27005778	metabolites	European	SNPs from the MHC (chr6 26M~34M) region was removed for this traits	-0.1043	0.079	-1.3198	0.1869	0.0816	0.05	1.0099	0.0207	0.004	0.0066
FVC	Extreme height	23563607	anthropometric	European	SNPs from the MHC (chr6 26M~34M) region was removed for this traits	-0.0443	0.0344	-1.2885	0.1976	1.2296	0.1066	1.0367	0.0175	-0.0094	0.0122
FVC	Cholesterol esters in large LDL	27005778	metabolites	European	SNPs from the MHC (chr6 26M~34M) region was removed for this traits	-0.1051	0.0823	-1.2765	0.2018	0.0766	0.0508	1.0123	0.0218	0.0058	0.0064
FVC	Ferritin	25352340	metal	European	SNPs from the MHC (chr6 26M~34M) region was removed for this traits	-0.0865	0.0695	-1.2448	0.2132	0.0917	0.0265	1.0278	0.0092	-0.0062	0.0086
FVC	22:6 docosahexaenoic acid	27005778	metabolites	European	SNPs from the MHC (chr6 26M~34M) region was removed for this traits	0.0709	0.0572	1.2398	0.2151	0.1307	0.037	0.9958	0.0072	-0.0027	0.0062
FVC	Total cholesterol in medium LDL	27005778	metabolites	European	SNPs from the MHC (chr6 26M~34M) region was removed for this traits	-0.0947	0.0773	-1.2254	0.2204	0.069	0.0469	1.013	0.022	0.0063	0.0064
FVC	Concentration of large LDL particles	27005778	metabolites	European	SNPs from the MHC (chr6 26M~34M) region was removed for this traits	-0.0985	0.0819	-1.2025	0.2292	0.0755	0.0502	1.016	0.0214	0.0042	0.0065
FVC	Total lipids in large LDL	27005778	metabolites	European	SNPs from the MHC (chr6 26M~34M) region was removed for this traits	-0.0978	0.0823	-1.1883	0.2347	0.0751	0.0513	1.0146	0.022	0.0048	0.0065
FVC	Difference in height between childhood and adulthood; age 8	23449627	anthropometric	European	SNPs from the MHC (chr6 26M~34M) region was removed for this traits	0.053	0.0452	1.1726	0.241	0.3375	0.0507	0.9713	0.0076	-0.0007	0.0073
FVC	Offspring birth weight	31043758	anthropometric	European	SNPs from the MHC (chr6 26M~34M) region was removed for this traits	0.0343	0.0296	1.1587	0.2466	0.0298	0.0026	1.0229	0.0082	-0.0032	0.0061
FVC	Concentration of IDL particles	27005778	metabolites	European	SNPs from the MHC (chr6 26M~34M) region was removed for this traits	-0.0897	0.0779	-1.1528	0.249	0.075	0.0429	1.0184	0.0181	0.0029	0.0066
FVC	Glucose	27005778	metabolites	European	SNPs from the MHC (chr6 26M~34M) region was removed for this traits	-0.0629	0.0552	-1.1394	0.2545	0.0857	0.0209	0.9961	0.0065	-0.0051	0.0059
FVC	Total Cholesterol	20686565	lipids	European	SNPs from the MHC (chr6 26M~34M) region was removed for this traits	-0.0302	0.0267	-1.132	0.2576	0.1343	0.0241	1.0209	0.0348	0.0023	0.0069
FVC	Total cholesterol in LDL	27005778	metabolites	European	SNPs from the MHC (chr6 26M~34M) region was removed for this traits	-0.0883	0.079	-1.1178	0.2636	0.0687	0.0506	1.0139	0.0238	0.0048	0.0065
FVC	Infant head circumference	22504419	anthropometric	European	SNPs from the MHC (chr6 26M~34M) region was removed for this traits	0.0505	0.0453	1.1142	0.2652	0.231	0.0447	0.9904	0.0067	0.0004	0.0055
FVC	Phospholipids in very small VLDL	27005778	metabolites	European	SNPs from the MHC (chr6 26M~34M) region was removed for this traits	-0.0778	0.0703	-1.107	0.2683	0.0853	0.038	1.0149	0.0153	0.0036	0.0065
FVC	Total lipids in IDL	27005778	metabolites	European	SNPs from the MHC (chr6 26M~34M) region was removed for this traits	-0.0866	0.079	-1.0955	0.2733	0.0736	0.0443	1.0192	0.0188	0.0036	0.0065
FVC	Mean Hippocampus	25607358	brain_volume	European	SNPs from the MHC (chr6 26M~34M) region was removed for this traits	-0.0688	0.0633	-1.0854	0.2777	0.1417	0.0388	0.9873	0.0065	-0.0009	0.0062
FVC	Total cholesterol in IDL	27005778	metabolites	European	SNPs from the MHC (chr6 26M~34M) region was removed for this traits	-0.0809	0.0802	-1.0076	0.3136	0.0711	0.0457	1.0189	0.0198	0.0049	0.0064
FVC	Alanine	27005778	metabolites	European	SNPs from the MHC (chr6 26M~34M) region was removed for this traits	0.0491	0.0508	0.9666	0.3338	0.0848	0.0271	1.0118	0.0072	-0.0117	0.0059
FVC	Inflammatory Bowel Disease (Euro)	26192919	autoimmune	European	SNPs from the MHC (chr6 26M~34M) region was removed for this traits	-0.0263	0.0274	-0.9609	0.3366	0.3347	0.0334	1.0534	0.0103	-0.0003	0.0062
FVC	Bipolar disorder	21926972	psychiatric	European	SNPs from the MHC (chr6 26M~34M) region was removed for this traits	0.0263	0.029	0.9073	0.3642	0.4349	0.0369	1.0218	0.0073	-0.009	0.0063
FVC	Description of average fatty acid chain length; not actual carbon number	27005778	metabolites	European	SNPs from the MHC (chr6 26M~34M) region was removed for this traits	-0.055	0.0612	-0.8976	0.3694	0.1	0.034	0.9833	0.0065	0.0166	0.006
FVC	Phospholipids in large LDL	27005778	metabolites	European	SNPs from the MHC (chr6 26M~34M) region was removed for this traits	-0.0661	0.0769	-0.8586	0.3906	0.0622	0.0447	1.0177	0.0212	0.006	0.0063
FVC	Total cholesterol in large LDL	27005778	metabolites	European	SNPs from the MHC (chr6 26M~34M) region was removed for this traits	-0.0634	0.075	-0.8452	0.398	0.0652	0.0467	1.0151	0.0225	0.0061	0.0063
FVC	Rheumatoid Arthritis	24390342	autoimmune	European	SNPs from the MHC (chr6 26M~34M) region was removed for this traits	-0.0201	0.0257	-0.784	0.433	0.1596	0.0287	1.0237	0.0162	-0.0069	0.0063
FVC	Phospholipids in medium HDL	27005778	metabolites	European	SNPs from the MHC (chr6 26M~34M) region was removed for this traits	0.0401	0.0515	0.7781	0.4365	0.0654	0.0233	0.9959	0.0077	0.0041	0.0053
FVC	Autism spectrum disorder	0	psychiatric	European	SNPs from the MHC (chr6 26M~34M) region was removed for this traits	-0.0274	0.0369	-0.7421	0.458	0.4519	0.0518	0.9665	0.0066	0.0036	0.0062
FVC	Phospholipids in IDL	27005778	metabolites	European	SNPs from the MHC (chr6 26M~34M) region was removed for this traits	-0.0542	0.0798	-0.6785	0.4974	0.0603	0.0416	1.0215	0.0193	0.0012	0.0065
FVC	Number of children ever born	27798627	reproductive	European	SNPs from the MHC (chr6 26M~34M) region was removed for this traits	-0.0184	0.0286	-0.6435	0.5199	0.0257	0.0018	0.9697	0.007	0.0026	0.0066
FVC	Alzheimers disease	24162737	neurological	European	SNPs from the MHC (chr6 26M~34M) region was removed for this traits	-0.032	0.0532	-0.6013	0.5476	0.0448	0.0213	1.0658	0.0294	0.001	0.0065
FVC	Mean Thalamus	25607358	brain_volume	European	SNPs from the MHC (chr6 26M~34M) region was removed for this traits	0.0335	0.0565	0.5928	0.5533	0.139	0.0358	0.9796	0.0063	-0.0007	0.006
FVC	Smoking Initiation	30617275	smoking_behaviour	European	SNPs from the MHC (chr6 26M~34M) region was removed for this traits	0.0235	0.0401	0.5849	0.5586	0.0053	0.0011	1.1023	0.0093	-0.0111	0.0067
FVC	ICV	25607358	brain_volume	European	SNPs from the MHC (chr6 26M~34M) region was removed for this traits	0.0311	0.0543	0.574	0.566	0.1749	0.0452	1.0024	0.0067	-0.0061	0.0059
FVC	Omega-3 fatty acids	27005778	metabolites	European	SNPs from the MHC (chr6 26M~34M) region was removed for this traits	0.029	0.0521	0.5568	0.5777	0.1545	0.0417	0.9911	0.0078	-0.0028	0.0065
FVC	Subjective well being	27089181	psychiatric	European	SNPs from the MHC (chr6 26M~34M) region was removed for this traits	0.0137	0.0305	0.4492	0.6533	0.0251	0.0021	1.001	0.0072	-0.0013	0.0066
FVC	Systemic lupus erythematosus	26502338	autoimmune	European	SNPs from the MHC (chr6 26M~34M) region was removed for this traits	0.016	0.0359	0.4467	0.6551	0.3867	0.0667	1.1066	0.0098	0.0005	0.0069
FVC	Free cholesterol in large LDL	27005778	metabolites	European	SNPs from the MHC (chr6 26M~34M) region was removed for this traits	-0.0307	0.0723	-0.4252	0.6707	0.0635	0.0482	1.0174	0.0235	0.0049	0.0063
FVC	Mean Pallidum	25607358	brain_volume	European	SNPs from the MHC (chr6 26M~34M) region was removed for this traits	-0.0187	0.0461	-0.4064	0.6844	0.1601	0.0412	0.978	0.0069	0.0011	0.0054
FVC	Free cholesterol in IDL	27005778	metabolites	European	SNPs from the MHC (chr6 26M~34M) region was removed for this traits	-0.0268	0.0709	-0.378	0.7055	0.0701	0.0414	1.0206	0.0199	0.0022	0.0066
FVC	Parkinsons disease	19915575	neurological	European	SNPs from the MHC (chr6 26M~34M) region was removed for this traits	-0.0117	0.0314	-0.3738	0.7085	0.4152	0.1187	1.1232	0.009	-0.0035	0.0057
FVC	Mean platelet volume	22139419	haemotological	European	SNPs from the MHC (chr6 26M~34M) region was removed for this traits	-0.0112	0.0337	-0.3325	0.7395	0.32	0.0508	0.9813	0.0108	-0.0014	0.0071
FVC	Age of smoking initiation	20418890	smoking_behaviour	European	SNPs from the MHC (chr6 26M~34M) region was removed for this traits	0.0159	0.0526	0.3022	0.7625	0.061	0.0185	0.9995	0.0063	0.006	0.0059
FVC	Neo-openness to experience	21173776	personality	European	SNPs from the MHC (chr6 26M~34M) region was removed for this traits	0.0148	0.0556	0.2655	0.7906	0.1056	0.0271	0.9918	0.0066	0.0099	0.0071
FVC	Average number of double bonds in a fatty acid chain	27005778	metabolites	European	SNPs from the MHC (chr6 26M~34M) region was removed for this traits	0.0113	0.0437	0.2591	0.7955	0.1717	0.0531	1.0017	0.0077	0.0149	0.006
FVC	Ulcerative colitis	26192919	autoimmune	European	SNPs from the MHC (chr6 26M~34M) region was removed for this traits	0.0072	0.0321	0.2257	0.8214	0.2584	0.0315	1.0474	0.0096	0.0014	0.0062
FVC	Sleep duration	27494321	sleeping	European	SNPs from the MHC (chr6 26M~34M) region was removed for this traits	-0.0051	0.0297	-0.1712	0.8641	0.0552	0.0049	1.0203	0.0072	-0.0073	0.0057
FVC	PGC cross-disorder analysis	23453885	psychiatric	European	SNPs from the MHC (chr6 26M~34M) region was removed for this traits	-0.0046	0.0284	-0.1609	0.8721	0.1723	0.0132	1.0141	0.0115	-0.0143	0.0084

## Sheet: ST1c
Supplementary File 1c: Genetic correlations between FEV1/FVC and 172 GWAS from the LDhub library
Trait1	Trait2	PMID	Category	Ethnicity	Note	rg	se	z	p	h2_obs	h2_obs_se	h2_int	h2_int_se	gcov_int	gcov_int_se
FEV1_to_FVC	Asthma	17611496	autoimmune	European	SNPs from the MHC (chr6 26M~34M) region was removed for this traits	-0.3531	0.0508	-6.9563	3.4924e-12	0.121	0.0266	1.0083	0.0082	-0.0064	0.0072
FEV1_to_FVC	Obesity class 1	23563607	anthropometric	European	SNPs from the MHC (chr6 26M~34M) region was removed for this traits	0.1211	0.0222	5.4652	4.6234e-08	0.2173	0.0116	1.018	0.0111	0.0101	0.0085
FEV1_to_FVC	Body mass index	20935630	anthropometric	European	SNPs from the MHC (chr6 26M~34M) region was removed for this traits	0.1089	0.0205	5.3126	1.0808e-07	0.1899	0.0097	1.0101	0.0105	0.018	0.0074
FEV1_to_FVC	Overweight	23563607	anthropometric	European	SNPs from the MHC (chr6 26M~34M) region was removed for this traits	0.1014	0.0221	4.597	4.2867e-06	0.1096	0.0065	1.0245	0.0095	0.0211	0.0075
FEV1_to_FVC	Waist circumference	25673412	anthropometric	European	SNPs from the MHC (chr6 26M~34M) region was removed for this traits	0.0775	0.0203	3.8175	0.0001	0.121	0.0051	0.8456	0.0075	0.01	0.0069
FEV1_to_FVC	HDL cholesterol	20686565	lipids	European	SNPs from the MHC (chr6 26M~34M) region was removed for this traits	-0.1138	0.0307	-3.7021	0.0002	0.1272	0.0229	1.0581	0.0494	0.011	0.0077
FEV1_to_FVC	Obesity class 2	23563607	anthropometric	European	SNPs from the MHC (chr6 26M~34M) region was removed for this traits	0.1069	0.0286	3.7313	0.0002	0.1845	0.0123	1.002	0.0098	0.0097	0.0083
FEV1_to_FVC	Waist-to-hip ratio	25673412	anthropometric	European	SNPs from the MHC (chr6 26M~34M) region was removed for this traits	0.0899	0.0243	3.704	0.0002	0.1129	0.0069	0.9212	0.0088	0.0041	0.0077
FEV1_to_FVC	Extreme bmi	23563607	anthropometric	European	SNPs from the MHC (chr6 26M~34M) region was removed for this traits	0.1107	0.0311	3.5654	0.0004	0.6923	0.0547	1.0299	0.0112	0.0094	0.01
FEV1_to_FVC	Triglycerides in chylomicrons and largest VLDL particles	27005778	metabolites	European	SNPs from the MHC (chr6 26M~34M) region was removed for this traits	0.1922	0.0567	3.3906	0.0007	0.0911	0.0272	0.9906	0.0065	-0.0106	0.0054
FEV1_to_FVC	Type 2 Diabetes	22885922	glycemic	European	SNPs from the MHC (chr6 26M~34M) region was removed for this traits	0.1142	0.0342	3.3345	0.0009	0.0882	0.0093	1.0076	0.007	-0.0088	0.0065
FEV1_to_FVC	Total cholesterol in large VLDL	27005778	metabolites	European	SNPs from the MHC (chr6 26M~34M) region was removed for this traits	0.1588	0.0494	3.2161	0.0013	0.1174	0.0286	0.9915	0.0066	-0.0159	0.0053
FEV1_to_FVC	Phospholipids in chylomicrons and largest VLDL particles	27005778	metabolites	European	SNPs from the MHC (chr6 26M~34M) region was removed for this traits	0.1616	0.0526	3.0749	0.0021	0.0976	0.0264	0.9848	0.0067	-0.0147	0.0052
FEV1_to_FVC	Triglycerides in very large VLDL	27005778	metabolites	European	SNPs from the MHC (chr6 26M~34M) region was removed for this traits	0.145	0.0471	3.0799	0.0021	0.1183	0.0294	0.9816	0.007	-0.0134	0.0053
FEV1_to_FVC	Phospholipids in very large VLDL	27005778	metabolites	European	SNPs from the MHC (chr6 26M~34M) region was removed for this traits	0.1477	0.0493	2.9974	0.0027	0.1072	0.0277	0.9853	0.0067	-0.0127	0.005
FEV1_to_FVC	Serum total triglycerides	27005778	metabolites	European	SNPs from the MHC (chr6 26M~34M) region was removed for this traits	0.1279	0.0429	2.9832	0.0029	0.1259	0.0355	0.9919	0.0075	-0.0093	0.0051
FEV1_to_FVC	Total cholesterol in medium VLDL	27005778	metabolites	European	SNPs from the MHC (chr6 26M~34M) region was removed for this traits	0.1219	0.0418	2.9168	0.0035	0.1259	0.0351	0.992	0.0075	-0.0072	0.0051
FEV1_to_FVC	Leptin_not_adjBMI	26833098	hormone	European	SNPs from the MHC (chr6 26M~34M) region was removed for this traits	0.1333	0.0458	2.9095	0.0036	0.0996	0.0159	0.9941	0.0065	-0.0067	0.0065
FEV1_to_FVC	Free cholesterol in large VLDL	27005778	metabolites	European	SNPs from the MHC (chr6 26M~34M) region was removed for this traits	0.1295	0.045	2.8754	0.004	0.1234	0.0297	0.9887	0.0067	-0.0139	0.0052
FEV1_to_FVC	Phospholipids in medium VLDL	27005778	metabolites	European	SNPs from the MHC (chr6 26M~34M) region was removed for this traits	0.131	0.0468	2.8027	0.0051	0.1112	0.0329	0.9968	0.0069	-0.0068	0.0052
FEV1_to_FVC	Cholesterol esters in medium VLDL	27005778	metabolites	European	SNPs from the MHC (chr6 26M~34M) region was removed for this traits	0.1081	0.0389	2.778	0.0055	0.1529	0.0374	0.986	0.0079	-0.004	0.0051
FEV1_to_FVC	Total lipids in very large VLDL	27005778	metabolites	European	SNPs from the MHC (chr6 26M~34M) region was removed for this traits	0.1228	0.0446	2.7526	0.0059	0.1371	0.03	0.9783	0.0071	-0.0119	0.0054
FEV1_to_FVC	Triglycerides in small VLDL	27005778	metabolites	European	SNPs from the MHC (chr6 26M~34M) region was removed for this traits	0.1251	0.0455	2.7515	0.0059	0.1206	0.0349	0.994	0.0072	-0.0092	0.0051
FEV1_to_FVC	Concentration of small VLDL particles	27005778	metabolites	European	SNPs from the MHC (chr6 26M~34M) region was removed for this traits	0.1095	0.0401	2.7275	0.0064	0.1517	0.0372	0.9898	0.0078	-0.0052	0.005
FEV1_to_FVC	Total lipids in small VLDL	27005778	metabolites	European	SNPs from the MHC (chr6 26M~34M) region was removed for this traits	0.1122	0.0412	2.7217	0.0065	0.1461	0.0372	0.9914	0.0081	-0.0041	0.0049
FEV1_to_FVC	Total lipids in medium VLDL	27005778	metabolites	European	SNPs from the MHC (chr6 26M~34M) region was removed for this traits	0.1152	0.043	2.6791	0.0074	0.1413	0.0342	0.9855	0.0066	-0.0068	0.0053
FEV1_to_FVC	Free cholesterol in medium VLDL	27005778	metabolites	European	SNPs from the MHC (chr6 26M~34M) region was removed for this traits	0.1218	0.0458	2.6588	0.0078	0.1121	0.0331	0.9956	0.007	-0.0068	0.0051
FEV1_to_FVC	Free cholesterol in large HDL	27005778	metabolites	European	SNPs from the MHC (chr6 26M~34M) region was removed for this traits	-0.1415	0.0533	-2.6544	0.0079	0.1055	0.0283	1.0087	0.0141	0.0051	0.0055
FEV1_to_FVC	Cholesterol esters in large VLDL	27005778	metabolites	European	SNPs from the MHC (chr6 26M~34M) region was removed for this traits	0.1074	0.0411	2.6135	0.009	0.1649	0.0343	0.9776	0.0069	-0.009	0.0054
FEV1_to_FVC	Isoleucine	27005778	metabolites	European	SNPs from the MHC (chr6 26M~34M) region was removed for this traits	0.1538	0.059	2.6063	0.0092	0.0721	0.0234	0.9943	0.0066	-0.0035	0.0052
FEV1_to_FVC	Phospholipids in large VLDL	27005778	metabolites	European	SNPs from the MHC (chr6 26M~34M) region was removed for this traits	0.1244	0.0478	2.6028	0.0092	0.1172	0.0304	0.9893	0.0064	-0.0086	0.0055
FEV1_to_FVC	Difference in height between adolescence and adulthood; age 14	23449627	anthropometric	European	SNPs from the MHC (chr6 26M~34M) region was removed for this traits	-0.1321	0.0509	-2.5968	0.0094	0.4537	0.1104	0.9813	0.0067	0.0102	0.0061
FEV1_to_FVC	Concentration of very large VLDL particles	27005778	metabolites	European	SNPs from the MHC (chr6 26M~34M) region was removed for this traits	0.1211	0.0485	2.4971	0.0125	0.1255	0.0296	0.9833	0.0067	-0.0077	0.0055
FEV1_to_FVC	Triglycerides in large VLDL	27005778	metabolites	European	SNPs from the MHC (chr6 26M~34M) region was removed for this traits	0.1222	0.0491	2.4888	0.0128	0.1129	0.0287	0.9885	0.0063	-0.0105	0.0054
FEV1_to_FVC	Triglycerides in medium VLDL	27005778	metabolites	European	SNPs from the MHC (chr6 26M~34M) region was removed for this traits	0.1314	0.0531	2.4773	0.0132	0.0973	0.03	0.9988	0.0065	-0.0081	0.0054
FEV1_to_FVC	Triglycerides	20686565	lipids	European	SNPs from the MHC (chr6 26M~34M) region was removed for this traits	0.0659	0.0266	2.4759	0.0133	0.1679	0.0288	0.9684	0.0162	0.0017	0.0079
FEV1_to_FVC	Concentration of large VLDL particles	27005778	metabolites	European	SNPs from the MHC (chr6 26M~34M) region was removed for this traits	0.116	0.0471	2.4638	0.0137	0.132	0.0344	0.9741	0.0068	-0.0076	0.0052
FEV1_to_FVC	Total lipids in chylomicrons and largest VLDL particles	27005778	metabolites	European	SNPs from the MHC (chr6 26M~34M) region was removed for this traits	0.1202	0.0489	2.4572	0.014	0.1202	0.0276	0.9898	0.0067	-0.011	0.0054
FEV1_to_FVC	Phospholipids in large HDL	27005778	metabolites	European	SNPs from the MHC (chr6 26M~34M) region was removed for this traits	-0.1173	0.0481	-2.4407	0.0147	0.1263	0.0302	0.9986	0.014	0.0058	0.0057
FEV1_to_FVC	Fasting insulin main effect	22581228	glycemic	European	SNPs from the MHC (chr6 26M~34M) region was removed for this traits	0.1038	0.0427	2.4316	0.015	0.0695	0.0101	1.016	0.0069	0.0074	0.0059
FEV1_to_FVC	Free cholesterol in small VLDL	27005778	metabolites	European	SNPs from the MHC (chr6 26M~34M) region was removed for this traits	0.1119	0.046	2.4313	0.015	0.1126	0.0335	0.9998	0.0087	-0.0047	0.0049
FEV1_to_FVC	Total cholesterol in large HDL	27005778	metabolites	European	SNPs from the MHC (chr6 26M~34M) region was removed for this traits	-0.1282	0.0528	-2.4269	0.0152	0.104	0.0286	1.007	0.0143	0.0029	0.0054
FEV1_to_FVC	Concentration of medium VLDL particles	27005778	metabolites	European	SNPs from the MHC (chr6 26M~34M) region was removed for this traits	0.0993	0.0411	2.4173	0.0156	0.1498	0.0355	0.9807	0.0068	-0.0056	0.0054
FEV1_to_FVC	Total cholesterol in small VLDL	27005778	metabolites	European	SNPs from the MHC (chr6 26M~34M) region was removed for this traits	0.1244	0.0516	2.4103	0.0159	0.092	0.0321	1.0051	0.0097	-0.0029	0.0047
FEV1_to_FVC	Phospholipids in small VLDL	27005778	metabolites	European	SNPs from the MHC (chr6 26M~34M) region was removed for this traits	0.1039	0.0432	2.404	0.0162	0.1178	0.035	0.9981	0.0085	-0.0042	0.0049
FEV1_to_FVC	Concentration of large HDL particles	27005778	metabolites	European	SNPs from the MHC (chr6 26M~34M) region was removed for this traits	-0.1124	0.0468	-2.4002	0.0164	0.1317	0.0303	0.9998	0.0151	0.0049	0.0056
FEV1_to_FVC	Hip circumference	25673412	anthropometric	European	SNPs from the MHC (chr6 26M~34M) region was removed for this traits	0.0552	0.023	2.3996	0.0164	0.1273	0.0058	0.8607	0.0081	0.0102	0.007
FEV1_to_FVC	Concentration of chylomicrons and largest VLDL particles	27005778	metabolites	European	SNPs from the MHC (chr6 26M~34M) region was removed for this traits	0.1253	0.0524	2.3923	0.0167	0.1168	0.0265	0.9882	0.0064	-0.0086	0.0056
FEV1_to_FVC	Triglycerides in very small VLDL	27005778	metabolites	European	SNPs from the MHC (chr6 26M~34M) region was removed for this traits	0.0984	0.0417	2.3628	0.0181	0.14	0.0364	0.9979	0.0096	-0.0038	0.0052
FEV1_to_FVC	Total lipids in large HDL	27005778	metabolites	European	SNPs from the MHC (chr6 26M~34M) region was removed for this traits	-0.1117	0.0473	-2.3618	0.0182	0.1297	0.0308	1.0009	0.0149	0.0044	0.0056
FEV1_to_FVC	Concentration of small LDL particles	27005778	metabolites	European	SNPs from the MHC (chr6 26M~34M) region was removed for this traits	0.149	0.0637	2.3399	0.0193	0.0938	0.0436	1.0073	0.0159	-0.0066	0.0054
FEV1_to_FVC	Mean diameter for VLDL particles	27005778	metabolites	European	SNPs from the MHC (chr6 26M~34M) region was removed for this traits	0.1075	0.0474	2.2663	0.0234	0.134	0.0348	0.9904	0.0085	-0.0092	0.0056
FEV1_to_FVC	Total lipids in large VLDL	27005778	metabolites	European	SNPs from the MHC (chr6 26M~34M) region was removed for this traits	0.1015	0.0455	2.2297	0.0258	0.1401	0.0299	0.9851	0.0063	-0.009	0.0056
FEV1_to_FVC	Lung cancer	27488534	cancer	European	SNPs from the MHC (chr6 26M~34M) region was removed for this traits	-0.0781	0.0354	-2.2085	0.0272	0.3166	0.0679	1.0143	0.0073	-0.003	0.0053
FEV1_to_FVC	Total lipids in small LDL	27005778	metabolites	European	SNPs from the MHC (chr6 26M~34M) region was removed for this traits	0.1522	0.0689	2.2075	0.0273	0.0864	0.0457	1.0082	0.0177	-0.0052	0.0053
FEV1_to_FVC	Subjective well being	27089181	psychiatric	European	SNPs from the MHC (chr6 26M~34M) region was removed for this traits	0.0565	0.0261	2.1679	0.0302	0.0251	0.0021	1.001	0.0072	-0.0052	0.0068
FEV1_to_FVC	Mean diameter for HDL particles	27005778	metabolites	European	SNPs from the MHC (chr6 26M~34M) region was removed for this traits	-0.104	0.048	-2.1659	0.0303	0.1184	0.0301	1.0088	0.0188	0.0024	0.0051
FEV1_to_FVC	Apolipoprotein B	27005778	metabolites	European	SNPs from the MHC (chr6 26M~34M) region was removed for this traits	0.1402	0.0648	2.1626	0.0306	0.0834	0.04	1.0087	0.0147	-0.0013	0.0053
FEV1_to_FVC	Number of children ever born	27798627	reproductive	European	SNPs from the MHC (chr6 26M~34M) region was removed for this traits	-0.0612	0.0289	-2.1167	0.0343	0.0257	0.0018	0.9697	0.007	0.0088	0.0055
FEV1_to_FVC	Cholesterol esters in large HDL	27005778	metabolites	European	SNPs from the MHC (chr6 26M~34M) region was removed for this traits	-0.1017	0.0486	-2.0912	0.0365	0.1225	0.0311	1.0011	0.0142	0.0016	0.0053
FEV1_to_FVC	Obesity class 3	23563607	anthropometric	European	SNPs from the MHC (chr6 26M~34M) region was removed for this traits	0.0782	0.0383	2.0386	0.0415	0.122	0.0141	0.9797	0.0091	0.0027	0.008
FEV1_to_FVC	Total cholesterol in small LDL	27005778	metabolites	European	SNPs from the MHC (chr6 26M~34M) region was removed for this traits	0.1539	0.077	1.9983	0.0457	0.0698	0.0438	1.0165	0.0191	-0.0051	0.0054
FEV1_to_FVC	Age at Menarche	25231870	reproductive	European	SNPs from the MHC (chr6 26M~34M) region was removed for this traits	-0.038	0.0192	-1.9761	0.0481	0.2018	0.0099	0.9541	0.0117	0.0014	0.007
FEV1_to_FVC	Concentration of medium LDL particles	27005778	metabolites	European	SNPs from the MHC (chr6 26M~34M) region was removed for this traits	0.1397	0.0719	1.9427	0.0521	0.0799	0.0487	1.0117	0.0201	-0.003	0.0053
FEV1_to_FVC	Total lipids in medium LDL	27005778	metabolites	European	SNPs from the MHC (chr6 26M~34M) region was removed for this traits	0.137	0.0715	1.9172	0.0552	0.0815	0.05	1.01	0.0207	-0.0027	0.0052
FEV1_to_FVC	Cholesterol esters in medium LDL	27005778	metabolites	European	SNPs from the MHC (chr6 26M~34M) region was removed for this traits	0.1362	0.0714	1.9069	0.0565	0.0809	0.0496	1.01	0.0208	-0.0021	0.0052
FEV1_to_FVC	Phospholipids in medium LDL	27005778	metabolites	European	SNPs from the MHC (chr6 26M~34M) region was removed for this traits	0.1297	0.0682	1.9024	0.0571	0.0729	0.0427	1.0086	0.0192	-0.0029	0.0051
FEV1_to_FVC	Concentration of very small VLDL particles	27005778	metabolites	European	SNPs from the MHC (chr6 26M~34M) region was removed for this traits	0.0893	0.0473	1.886	0.0593	0.1173	0.0357	1.005	0.0122	-3.5427e-05	0.0051
FEV1_to_FVC	Neo-openness to experience	21173776	personality	European	SNPs from the MHC (chr6 26M~34M) region was removed for this traits	-0.0913	0.0494	-1.8467	0.0648	0.1056	0.0271	0.9918	0.0066	0.0097	0.0064
FEV1_to_FVC	Total lipids in very small VLDL	27005778	metabolites	European	SNPs from the MHC (chr6 26M~34M) region was removed for this traits	0.0918	0.0499	1.841	0.0656	0.1074	0.036	1.0096	0.0126	2.7952e-05	0.0052
FEV1_to_FVC	Phospholipids in very large HDL	27005778	metabolites	European	SNPs from the MHC (chr6 26M~34M) region was removed for this traits	-0.1015	0.0567	-1.7892	0.0736	0.0904	0.0301	1.0083	0.0167	0.0019	0.0053
FEV1_to_FVC	Sitting height ratio	25865494	anthropometric	European	SNPs from the MHC (chr6 26M~34M) region was removed for this traits	-0.0676	0.0382	-1.7722	0.0764	0.2221	0.0283	0.9798	0.0076	0.0041	0.0072
FEV1_to_FVC	Total cholesterol in large LDL	27005778	metabolites	European	SNPs from the MHC (chr6 26M~34M) region was removed for this traits	0.1348	0.0763	1.7675	0.0771	0.0651	0.0467	1.0151	0.0225	-0.0008	0.0051
FEV1_to_FVC	Total cholesterol in medium LDL	27005778	metabolites	European	SNPs from the MHC (chr6 26M~34M) region was removed for this traits	0.1285	0.0738	1.7416	0.0816	0.0689	0.0469	1.0131	0.022	-0.0012	0.0052
FEV1_to_FVC	Cholesterol esters in large LDL	27005778	metabolites	European	SNPs from the MHC (chr6 26M~34M) region was removed for this traits	0.1247	0.073	1.708	0.0876	0.0764	0.0509	1.0124	0.0218	-0.0004	0.0052
FEV1_to_FVC	Phospholipids in large LDL	27005778	metabolites	European	SNPs from the MHC (chr6 26M~34M) region was removed for this traits	0.128	0.0751	1.7035	0.0885	0.0621	0.0446	1.0177	0.0212	-0.0003	0.0051
FEV1_to_FVC	Triglycerides in IDL	27005778	metabolites	European	SNPs from the MHC (chr6 26M~34M) region was removed for this traits	0.0846	0.05	1.6935	0.0904	0.1084	0.0345	1.0103	0.0149	-0.0005	0.0055
FEV1_to_FVC	Total cholesterol in HDL	27005778	metabolites	European	SNPs from the MHC (chr6 26M~34M) region was removed for this traits	-0.0877	0.0531	-1.6519	0.0985	0.0925	0.0283	1.0071	0.0128	0.0004	0.0057
FEV1_to_FVC	Concentration of large LDL particles	27005778	metabolites	European	SNPs from the MHC (chr6 26M~34M) region was removed for this traits	0.1206	0.0732	1.6474	0.0995	0.0754	0.0503	1.0161	0.0215	5.3662e-07	0.0053
FEV1_to_FVC	Total lipids in large LDL	27005778	metabolites	European	SNPs from the MHC (chr6 26M~34M) region was removed for this traits	0.1216	0.074	1.6422	0.1005	0.075	0.0514	1.0147	0.0221	-5.5842e-05	0.0052
FEV1_to_FVC	LDL cholesterol	20686565	lipids	European	SNPs from the MHC (chr6 26M~34M) region was removed for this traits	0.0459	0.028	1.6371	0.1016	0.104	0.0284	1.0515	0.0483	0.0061	0.0075
FEV1_to_FVC	Total cholesterol in LDL	27005778	metabolites	European	SNPs from the MHC (chr6 26M~34M) region was removed for this traits	0.1261	0.0774	1.6297	0.1032	0.0686	0.0506	1.014	0.0238	-0.0015	0.0053
FEV1_to_FVC	Ferritin	25352340	metal	European	SNPs from the MHC (chr6 26M~34M) region was removed for this traits	0.1016	0.0628	1.6185	0.1055	0.0917	0.0265	1.0278	0.0092	-0.0043	0.0079
FEV1_to_FVC	Free cholesterol in large LDL	27005778	metabolites	European	SNPs from the MHC (chr6 26M~34M) region was removed for this traits	0.1209	0.077	1.5707	0.1163	0.0633	0.0482	1.0174	0.0235	0.0004	0.0052
FEV1_to_FVC	Alanine	27005778	metabolites	European	SNPs from the MHC (chr6 26M~34M) region was removed for this traits	0.0734	0.0479	1.5337	0.1251	0.0849	0.0271	1.0117	0.0072	0.0065	0.0057
FEV1_to_FVC	Concentration of IDL particles	27005778	metabolites	European	SNPs from the MHC (chr6 26M~34M) region was removed for this traits	0.1048	0.0689	1.5218	0.1281	0.0749	0.043	1.0185	0.0181	0.0017	0.0054
FEV1_to_FVC	Phospholipids in IDL	27005778	metabolites	European	SNPs from the MHC (chr6 26M~34M) region was removed for this traits	0.1143	0.0756	1.5118	0.1306	0.0602	0.0416	1.0216	0.0193	0.0013	0.0053
FEV1_to_FVC	Valine	27005778	metabolites	European	SNPs from the MHC (chr6 26M~34M) region was removed for this traits	0.0905	0.06	1.5079	0.1316	0.0606	0.0194	1.0157	0.0074	0.002	0.0056
FEV1_to_FVC	Glycoprotein acetyls; mainly a1-acid glycoprotein	27005778	metabolites	European	SNPs from the MHC (chr6 26M~34M) region was removed for this traits	0.075	0.05	1.4998	0.1337	0.1023	0.0288	0.9849	0.0063	0.0006	0.0053
FEV1_to_FVC	Total lipids in IDL	27005778	metabolites	European	SNPs from the MHC (chr6 26M~34M) region was removed for this traits	0.1044	0.0705	1.4807	0.1387	0.0734	0.0444	1.0193	0.0189	0.0016	0.0053
FEV1_to_FVC	Parkinsons disease	19915575	neurological	European	SNPs from the MHC (chr6 26M~34M) region was removed for this traits	-0.0469	0.0321	-1.4611	0.144	0.4152	0.1187	1.1232	0.009	0.0027	0.0058
FEV1_to_FVC	Free cholesterol in IDL	27005778	metabolites	European	SNPs from the MHC (chr6 26M~34M) region was removed for this traits	0.0971	0.0677	1.4334	0.1517	0.0699	0.0414	1.0207	0.0199	0.0012	0.0052
FEV1_to_FVC	Total cholesterol in IDL	27005778	metabolites	European	SNPs from the MHC (chr6 26M~34M) region was removed for this traits	0.1022	0.0721	1.4191	0.1559	0.0709	0.0457	1.0189	0.0198	0.0015	0.0052
FEV1_to_FVC	Offspring birth weight	31043758	anthropometric	European	SNPs from the MHC (chr6 26M~34M) region was removed for this traits	0.0426	0.0311	1.3686	0.1711	0.0298	0.0026	1.0229	0.0082	0.0025	0.0065
FEV1_to_FVC	College completion	23722424	education	European	SNPs from the MHC (chr6 26M~34M) region was removed for this traits	0.0368	0.0271	1.3581	0.1744	0.0793	0.0057	1.0211	0.0087	-0.0057	0.0073
FEV1_to_FVC	Height_2010	20881960	anthropometric	European	SNPs from the MHC (chr6 26M~34M) region was removed for this traits	-0.0359	0.0265	-1.3554	0.1753	0.2856	0.0164	1.0182	0.0186	-0.0081	0.0095
FEV1_to_FVC	Citrate	27005778	metabolites	European	SNPs from the MHC (chr6 26M~34M) region was removed for this traits	-0.08	0.0607	-1.317	0.1878	0.0705	0.0208	1.0122	0.0076	0.0076	0.0058
FEV1_to_FVC	Phospholipids in very small VLDL	27005778	metabolites	European	SNPs from the MHC (chr6 26M~34M) region was removed for this traits	0.0757	0.058	1.3038	0.1923	0.0852	0.0379	1.0149	0.0153	0.0039	0.0052
FEV1_to_FVC	Age of smoking initiation	20418890	smoking_behaviour	European	SNPs from the MHC (chr6 26M~34M) region was removed for this traits	-0.083	0.0638	-1.3003	0.1935	0.061	0.0186	0.9995	0.0063	0.0115	0.0062
FEV1_to_FVC	PGC cross-disorder analysis	23453885	psychiatric	European	SNPs from the MHC (chr6 26M~34M) region was removed for this traits	-0.035	0.0289	-1.2137	0.2249	0.1722	0.0133	1.0141	0.0116	-0.0023	0.0093
FEV1_to_FVC	Major depressive disorder	22472876	psychiatric	European	SNPs from the MHC (chr6 26M~34M) region was removed for this traits	-0.0511	0.0421	-1.2134	0.225	0.1716	0.0255	1.0052	0.006	0.0035	0.0059
FEV1_to_FVC	Insomnia	28604731	sleeping	European	SNPs from the MHC (chr6 26M~34M) region was removed for this traits	0.0431	0.0362	1.1916	0.2334	0.0475	0.0049	1.0031	0.007	-0.0129	0.006
FEV1_to_FVC	Birth weight	27680694	anthropometric	European	SNPs from the MHC (chr6 26M~34M) region was removed for this traits	-0.0327	0.0276	-1.1851	0.236	0.1023	0.0066	1.0421	0.0098	0.0192	0.0073
FEV1_to_FVC	Offspring birth weight (maternal effect)	31043758	anthropometric	European	SNPs from the MHC (chr6 26M~34M) region was removed for this traits	0.0287	0.0247	1.1635	0.2446	0.1047	0.0059	1.0495	0.0124	0.0066	0.0072
FEV1_to_FVC	Systemic lupus erythematosus	26502338	autoimmune	European	SNPs from the MHC (chr6 26M~34M) region was removed for this traits	-0.0456	0.04	-1.1387	0.2548	0.3866	0.0667	1.1067	0.0098	0.0035	0.007
FEV1_to_FVC	Free cholesterol in medium HDL	27005778	metabolites	European	SNPs from the MHC (chr6 26M~34M) region was removed for this traits	-0.069	0.0614	-1.123	0.2614	0.0649	0.0233	0.9986	0.0083	0.0031	0.0063
FEV1_to_FVC	Age at Menopause	26414677	reproductive	European	SNPs from the MHC (chr6 26M~34M) region was removed for this traits	0.0293	0.0264	1.11	0.267	0.1359	0.0159	0.9896	0.0138	0.0009	0.0062
FEV1_to_FVC	Fathers age at death	27015805	aging	European	SNPs from the MHC (chr6 26M~34M) region was removed for this traits	0.0485	0.0444	1.092	0.2748	0.04	0.0069	1.0177	0.0069	0.004	0.0062
FEV1_to_FVC	Urate	23263486	other	European	SNPs from the MHC (chr6 26M~34M) region was removed for this traits	-0.0268	0.0254	-1.0587	0.2897	0.176	0.0583	0.9534	0.049	0.0191	0.0069
FEV1_to_FVC	Glucose	27005778	metabolites	European	SNPs from the MHC (chr6 26M~34M) region was removed for this traits	0.055	0.0521	1.0555	0.2912	0.0858	0.0209	0.9961	0.0065	0.0004	0.0055
FEV1_to_FVC	Lung cancer (all)	24880342	cancer	European	SNPs from the MHC (chr6 26M~34M) region was removed for this traits	-0.0454	0.0431	-1.0542	0.2918	0.1293	0.0295	1.0071	0.008	-0.0089	0.006
FEV1_to_FVC	Childhood obesity	22484627	anthropometric	European	SNPs from the MHC (chr6 26M~34M) region was removed for this traits	0.0335	0.0321	1.0453	0.2959	0.413	0.0461	0.9265	0.0075	-0.001	0.0058
FEV1_to_FVC	Omega-3 fatty acids	27005778	metabolites	European	SNPs from the MHC (chr6 26M~34M) region was removed for this traits	0.054	0.0531	1.0174	0.309	0.1545	0.0417	0.9911	0.0078	-0.0024	0.0059
FEV1_to_FVC	Intelligence	28530673	cognitive	European	SNPs from the MHC (chr6 26M~34M) region was removed for this traits	0.0214	0.0211	1.0145	0.3103	0.1885	0.0104	1.01	0.0081	0.0142	0.006
FEV1_to_FVC	Bipolar disorder	21926972	psychiatric	European	SNPs from the MHC (chr6 26M~34M) region was removed for this traits	-0.031	0.0313	-0.9886	0.3228	0.4349	0.0369	1.0218	0.0073	0.004	0.0065
FEV1_to_FVC	18:2 linoleic acid (LA)	27005778	metabolites	European	SNPs from the MHC (chr6 26M~34M) region was removed for this traits	0.049	0.0496	0.9873	0.3235	0.1285	0.0483	1.0028	0.0098	0.0067	0.0053
FEV1_to_FVC	Childhood IQ	23358156	education	European	SNPs from the MHC (chr6 26M~34M) region was removed for this traits	-0.0414	0.043	-0.9613	0.3364	0.2747	0.0452	1.0019	0.0093	0.0059	0.0075
FEV1_to_FVC	HbA1C	20858683	glycemic	European	SNPs from the MHC (chr6 26M~34M) region was removed for this traits	0.041	0.044	0.9318	0.3515	0.0655	0.0117	0.9989	0.0071	0.002	0.0068
FEV1_to_FVC	ICV	25607358	brain_volume	European	SNPs from the MHC (chr6 26M~34M) region was removed for this traits	0.0442	0.0495	0.8926	0.3721	0.1747	0.0452	1.0025	0.0067	-0.0064	0.0059
FEV1_to_FVC	HOMA-B	20081858	glycemic	European	SNPs from the MHC (chr6 26M~34M) region was removed for this traits	0.0448	0.0503	0.8915	0.3727	0.0909	0.0135	0.9888	0.0063	0.0077	0.0068
FEV1_to_FVC	Fasting glucose main effect	22581228	glycemic	European	SNPs from the MHC (chr6 26M~34M) region was removed for this traits	-0.028	0.0318	-0.8823	0.3776	0.0985	0.0189	0.9981	0.0094	0.0111	0.0059
FEV1_to_FVC	Sleep duration	27494321	sleeping	European	SNPs from the MHC (chr6 26M~34M) region was removed for this traits	-0.0269	0.0313	-0.8594	0.3901	0.0552	0.0049	1.0203	0.0073	0.0091	0.0062
FEV1_to_FVC	Ulcerative colitis	26192919	autoimmune	European	SNPs from the MHC (chr6 26M~34M) region was removed for this traits	-0.0283	0.0335	-0.844	0.3987	0.2583	0.0315	1.0475	0.0096	-0.0146	0.0061
FEV1_to_FVC	Phospholipids in medium HDL	27005778	metabolites	European	SNPs from the MHC (chr6 26M~34M) region was removed for this traits	-0.0481	0.058	-0.8294	0.4069	0.0655	0.0233	0.9958	0.0077	0.0008	0.006
FEV1_to_FVC	Average number of double bonds in a fatty acid chain	27005778	metabolites	European	SNPs from the MHC (chr6 26M~34M) region was removed for this traits	0.0319	0.0393	0.8133	0.4161	0.1717	0.053	1.0017	0.0077	-0.0069	0.0052
FEV1_to_FVC	Age of first birth	27798627	reproductive	European	SNPs from the MHC (chr6 26M~34M) region was removed for this traits	0.016	0.0216	0.7413	0.4585	0.0628	0.0035	0.9518	0.008	4.2463e-05	0.006
FEV1_to_FVC	Inflammatory Bowel Disease (Euro)	26192919	autoimmune	European	SNPs from the MHC (chr6 26M~34M) region was removed for this traits	-0.0188	0.0255	-0.7363	0.4616	0.3347	0.0334	1.0535	0.0103	-0.0118	0.0059
FEV1_to_FVC	22:6 docosahexaenoic acid	27005778	metabolites	European	SNPs from the MHC (chr6 26M~34M) region was removed for this traits	0.0385	0.0526	0.7313	0.4646	0.1308	0.037	0.9957	0.0072	0.0016	0.0061
FEV1_to_FVC	Platelet count	22139419	haemotological	European	SNPs from the MHC (chr6 26M~34M) region was removed for this traits	0.0216	0.0304	0.71	0.4777	0.1206	0.0115	0.9841	0.0081	0.0005	0.0058
FEV1_to_FVC	Depressive symptoms	27089181	psychiatric	European	SNPs from the MHC (chr6 26M~34M) region was removed for this traits	-0.0222	0.0334	-0.6649	0.5061	0.0475	0.0037	1.0001	0.0071	-0.0113	0.0063
FEV1_to_FVC	Mean Hippocampus	25607358	brain_volume	European	SNPs from the MHC (chr6 26M~34M) region was removed for this traits	0.0402	0.0618	0.6505	0.5154	0.1417	0.0388	0.9873	0.0065	-0.0019	0.0064
FEV1_to_FVC	Urinary albumin-to-creatinine ratio (non-diabetes)	26631737	kidney	European	SNPs from the MHC (chr6 26M~34M) region was removed for this traits	0.0312	0.0483	0.6453	0.5188	0.0534	0.0107	0.9949	0.0073	-0.0042	0.0067
FEV1_to_FVC	Mean platelet volume	22139419	haemotological	European	SNPs from the MHC (chr6 26M~34M) region was removed for this traits	0.0221	0.0362	0.6095	0.5422	0.32	0.0509	0.9814	0.0108	0.0009	0.0072
FEV1_to_FVC	Leptin_adjBMI	26833098	hormone	European	SNPs from the MHC (chr6 26M~34M) region was removed for this traits	0.0293	0.0482	0.6074	0.5436	0.0956	0.0175	1.0031	0.0069	-0.0018	0.0069
FEV1_to_FVC	Mean Thalamus	25607358	brain_volume	European	SNPs from the MHC (chr6 26M~34M) region was removed for this traits	0.0348	0.059	0.59	0.5552	0.139	0.0357	0.9796	0.0063	-0.01	0.0063
FEV1_to_FVC	Urinary albumin-to-creatinine ratio	26631737	kidney	European	SNPs from the MHC (chr6 26M~34M) region was removed for this traits	0.0283	0.0483	0.5869	0.5573	0.0456	0.0088	0.9962	0.0068	-0.0005	0.0062
FEV1_to_FVC	Total Cholesterol	20686565	lipids	European	SNPs from the MHC (chr6 26M~34M) region was removed for this traits	0.0132	0.0236	0.5588	0.5763	0.1343	0.0241	1.0209	0.0348	0.0098	0.0068
FEV1_to_FVC	Description of average fatty acid chain length; not actual carbon number	27005778	metabolites	European	SNPs from the MHC (chr6 26M~34M) region was removed for this traits	0.0288	0.0541	0.5319	0.5948	0.1001	0.0341	0.9832	0.0065	-0.0014	0.0053
FEV1_to_FVC	Extreme height	23563607	anthropometric	European	SNPs from the MHC (chr6 26M~34M) region was removed for this traits	-0.0191	0.0365	-0.523	0.601	1.2296	0.1066	1.0367	0.0175	-0.018	0.0118
FEV1_to_FVC	Cigarettes smoked per day	20418890	smoking_behaviour	European	SNPs from the MHC (chr6 26M~34M) region was removed for this traits	-0.0228	0.0456	-0.5009	0.6164	0.0602	0.015	1.0045	0.006	-0.0005	0.0054
FEV1_to_FVC	Parents age at death	27015805	aging	European	SNPs from the MHC (chr6 26M~34M) region was removed for this traits	-0.0274	0.0546	-0.5009	0.6164	0.0289	0.0069	1.016	0.0063	0.0151	0.0063
FEV1_to_FVC	Primary biliary cirrhosis	26394269	autoimmune	European	SNPs from the MHC (chr6 26M~34M) region was removed for this traits	-0.019	0.0399	-0.476	0.6341	0.3751	0.0634	1.0039	0.0098	0.0031	0.007
FEV1_to_FVC	Creatinine	27005778	metabolites	European	SNPs from the MHC (chr6 26M~34M) region was removed for this traits	0.0195	0.0445	0.4375	0.6618	0.1159	0.0247	1.0115	0.0073	-0.007	0.0058
FEV1_to_FVC	Child birth weight	23202124	anthropometric	European	SNPs from the MHC (chr6 26M~34M) region was removed for this traits	0.0184	0.0433	0.4249	0.6709	0.111	0.018	1.0051	0.0058	0.0055	0.006
FEV1_to_FVC	Celiac disease	20190752	autoimmune	European	SNPs from the MHC (chr6 26M~34M) region was removed for this traits	-0.0152	0.0397	-0.3843	0.7008	0.3086	0.049	1.0649	0.0108	-0.0006	0.0083
FEV1_to_FVC	Alzheimers disease	24162737	neurological	European	SNPs from the MHC (chr6 26M~34M) region was removed for this traits	-0.02	0.0521	-0.3837	0.7012	0.0448	0.0213	1.0658	0.0294	-0.0056	0.0063
FEV1_to_FVC	Own birth weight (fetal effect)	31043758	anthropometric	European	SNPs from the MHC (chr6 26M~34M) region was removed for this traits	-0.0121	0.0316	-0.3828	0.7019	0.0302	0.0029	1.0362	0.0088	0.0034	0.0066
FEV1_to_FVC	Glutamine	27005778	metabolites	European	SNPs from the MHC (chr6 26M~34M) region was removed for this traits	-0.0228	0.0603	-0.3784	0.7051	0.0618	0.0205	1.0187	0.0077	0.0126	0.0061
FEV1_to_FVC	HOMA-IR	20081858	glycemic	European	SNPs from the MHC (chr6 26M~34M) region was removed for this traits	0.0204	0.0553	0.3685	0.7125	0.0684	0.0124	1.0032	0.0065	0.0184	0.0066
FEV1_to_FVC	Autism spectrum disorder	0	psychiatric	European	SNPs from the MHC (chr6 26M~34M) region was removed for this traits	0.012	0.0378	0.3181	0.7504	0.4521	0.0519	0.9665	0.0066	0.0024	0.0064
FEV1_to_FVC	Infant head circumference	22504419	anthropometric	European	SNPs from the MHC (chr6 26M~34M) region was removed for this traits	0.0118	0.0455	0.2597	0.7951	0.231	0.0447	0.9904	0.0067	-0.0073	0.0064
FEV1_to_FVC	Mean Putamen	25607358	brain_volume	European	SNPs from the MHC (chr6 26M~34M) region was removed for this traits	-0.0081	0.0355	-0.2269	0.8205	0.2983	0.0461	0.9501	0.0068	-0.0023	0.006
FEV1_to_FVC	Years of schooling 2016	27225129	education	European	SNPs from the MHC (chr6 26M~34M) region was removed for this traits	0.0038	0.017	0.2259	0.8213	0.127	0.0044	0.9271	0.0101	0.0118	0.0064
FEV1_to_FVC	Former vs Current smoker	20418890	smoking_behaviour	European	SNPs from the MHC (chr6 26M~34M) region was removed for this traits	-0.0089	0.0445	-0.201	0.8407	0.063	0.0104	1.0007	0.0067	0.0065	0.0061
FEV1_to_FVC	Height; Females at age 10 and males at age 12	23449627	anthropometric	European	SNPs from the MHC (chr6 26M~34M) region was removed for this traits	-0.0078	0.0407	-0.191	0.8485	0.4303	0.0479	0.9526	0.0079	0.0007	0.0075
FEV1_to_FVC	Ever vs never smoked	20418890	smoking_behaviour	European	SNPs from the MHC (chr6 26M~34M) region was removed for this traits	0.0063	0.0331	0.1905	0.8489	0.0746	0.0065	0.9976	0.006	-0.0089	0.0059
FEV1_to_FVC	Neuroticism	27089181	personality	European	SNPs from the MHC (chr6 26M~34M) region was removed for this traits	-0.0058	0.0315	-0.1848	0.8534	0.0893	0.0074	0.9901	0.0117	-0.009	0.008
FEV1_to_FVC	Excessive daytime sleepiness	27992416	sleeping	European	SNPs from the MHC (chr6 26M~34M) region was removed for this traits	0.0052	0.0305	0.1694	0.8655	0.0538	0.0052	1.0033	0.0068	0.0037	0.0058
FEV1_to_FVC	Squamous cell lung cancer	27488534	cancer	European	SNPs from the MHC (chr6 26M~34M) region was removed for this traits	-0.0093	0.0553	-0.1687	0.866	0.0389	0.0122	1.0105	0.0066	-0.0114	0.0058
FEV1_to_FVC	Rheumatoid Arthritis	24390342	autoimmune	European	SNPs from the MHC (chr6 26M~34M) region was removed for this traits	0.0045	0.029	0.1559	0.8761	0.1596	0.0287	1.0236	0.0162	-0.0006	0.0064
FEV1_to_FVC	Chronotype	27494321	sleeping	European	SNPs from the MHC (chr6 26M~34M) region was removed for this traits	0.0027	0.0246	0.111	0.9116	0.101	0.0058	1.0149	0.0076	0.013	0.006
FEV1_to_FVC	Mean Caudate	25607358	brain_volume	European	SNPs from the MHC (chr6 26M~34M) region was removed for this traits	0.0047	0.0459	0.1029	0.9181	0.249	0.0387	0.9687	0.006	-0.0045	0.0059
FEV1_to_FVC	Own birth weight	31043758	anthropometric	European	SNPs from the MHC (chr6 26M~34M) region was removed for this traits	0.0022	0.024	0.0915	0.9271	0.0988	0.0054	1.0812	0.0156	0.0098	0.0076
FEV1_to_FVC	Mean Pallidum	25607358	brain_volume	European	SNPs from the MHC (chr6 26M~34M) region was removed for this traits	-0.0043	0.0585	-0.0736	0.9413	0.16	0.0412	0.978	0.0069	-0.0075	0.0061
FEV1_to_FVC	Extreme waist-to-hip ratio	23563607	anthropometric	European	SNPs from the MHC (chr6 26M~34M) region was removed for this traits	0.0028	0.0434	0.0649	0.9482	0.3606	0.057	0.9771	0.0084	0.0067	0.0091
FEV1_to_FVC	Child birth length	25281659	anthropometric	European	SNPs from the MHC (chr6 26M~34M) region was removed for this traits	0.0028	0.0482	0.058	0.9538	0.1704	0.0233	0.9924	0.0072	0.002	0.0072
FEV1_to_FVC	Difference in height between childhood and adulthood; age 8	23449627	anthropometric	European	SNPs from the MHC (chr6 26M~34M) region was removed for this traits	-0.0023	0.0468	-0.0496	0.9605	0.3375	0.0507	0.9713	0.0076	-0.0031	0.0072
FEV1_to_FVC	Smoking Initiation	30617275	smoking_behaviour	European	SNPs from the MHC (chr6 26M~34M) region was removed for this traits	0.0022	0.0447	0.0482	0.9616	0.0053	0.0011	1.1023	0.0094	-0.0205	0.008
FEV1_to_FVC	Crohns disease	26192919	autoimmune	European	SNPs from the MHC (chr6 26M~34M) region was removed for this traits	-0.0011	0.0262	-0.0438	0.9651	0.5025	0.0576	1.0231	0.0116	-0.0032	0.0059
FEV1_to_FVC	Mothers age at death	27015805	aging	European	SNPs from the MHC (chr6 26M~34M) region was removed for this traits	-0.0016	0.045	-0.0366	0.9708	0.0355	0.0075	1.0133	0.0072	0.0143	0.006
FEV1_to_FVC	Apolipoprotein A-I	27005778	metabolites	European	SNPs from the MHC (chr6 26M~34M) region was removed for this traits	-0.0007	0.0635	-0.0116	0.9908	0.0716	0.0307	1.0058	0.0118	-0.0029	0.006
FEV1_to_FVC	Anorexia Nervosa	24514567	psychiatric	European	SNPs from the MHC (chr6 26M~34M) region was removed for this traits	-1.9709e-06	0.0226	-8.7115e-05	0.9999	0.5574	0.0312	0.8981	0.0071	0.002	0.0063

## Sheet: ST1d
Supplementary File 1d: Latent casual variable models constructed between metabolic/hormonal traits and measures of lung function
Trait 1	Trait 2	GCP	SE	P	PMID (GWAS)
Fasting glucose	FEV1	0.566302	0.18224	7.1787e-12	22581228
Fasting glucose (BMI adjusted)	FEV1	0.462016	0.233665	0.0493148	22581228
Fasting insulin	FEV1	-0.441108	0.359	0.29988	22581228
Leptin (BMI adjusted)	FEV1	-0.449027	0.351548	0.21777	26833098
Leptin (BMI unadjusted)	FEV1	-0.101973	0.313226	0.956669	26833098
Urate	FEV1	0.4681	0.3221	0.159002	23263486
Fasting glucose	FVC	0.767059	0.147652	1.31639e-56	22581228
Fasting glucose (BMI adjusted)	FVC	0.625669	0.217406	1.6667e-56	22581228
Fasting insulin	FVC	-0.0418385	0.353387	0.898899	22581228
Leptin (BMI adjusted)	FVC	-0.411561	0.373508	0.35202	26833098
Leptin (BMI unadjusted)	FVC	0.418844	0.196127	0.0364146	26833098
Urate	FVC	0.729628	0.17772	5.44253e-30	23263486
Triglycerides	FVC	0.17443	0.451824	0.444126	20686565
HDL	FVC	-0.107792	0.536024	0.761882	20686565
HDL	FEV1/FVC	0.592623	0.25756	4.11735e-07	20686565

## Sheet: ST1e
Supplementary File 1e: Two-sample Mendelian randomisation models testing the effect of fasting glucose on lung function
Exposure	Outcome	Method	NSNP	Beta	SE	ci_lower	ci_upper	P
Fasting glucose	FEV1	Inverse variance weighted (multiplicative random effects)	32	-0.0963668	0.0424828	-0.179633	-0.0131006	0.0233064
Fasting glucose	FEV1	Inverse variance weighted (fixed effects)	32	-0.0963668	0.018455	-0.132539	-0.0601951	1.77262e-07
Fasting glucose	FEV1	Weighted median	32	-0.0705561	0.0315449	-0.132384	-0.00872804	0.0253069
Fasting glucose	FEV1	MR Egger	32	-0.117399	0.0911035	-0.295961	0.0611642	0.207376
Fasting glucose	FVC	Inverse variance weighted (multiplicative random effects)	32	-0.0880751	0.0412199	-0.168866	-0.00728412	0.0326213
Fasting glucose	FVC	Inverse variance weighted (fixed effects)	32	-0.0880751	0.0185984	-0.124528	-0.0516223	2.1837e-06
Fasting glucose	FVC	Weighted median	32	-0.0981364	0.031561	-0.159996	-0.0362769	0.00187455
Fasting glucose	FVC	MR Egger	32	-0.130893	0.0880679	-0.303506	0.0417199	0.147641

## Sheet: ST1f
Supplementary File 1f: Two-sample Mendelian randomisation models testing the effect of fasting glucose on lung function: sensitivity and pleiotropy analyses
Exposure	Outcome	Test	Test statistic name	Test statistic	P
Fasting glucose	FEV1	MR-PRESSO global test of pleiotropy	RSSobs	1.47696e-09	1
Fasting glucose	FEV1	MR Egger intercept	Egger intercept	0.00063304	0.795038
Fasting glucose	FEV1	Cochran's Q (Heterogeneity)	Q	164.271	4.44532e-20
Fasting glucose	FVC	MR-PRESSO global test of pleiotropy	RSSobs	0.00046563	1
Fasting glucose	FVC	MR Egger intercept	Egger intercept	0.00128591	0.585066
Fasting glucose	FVC	Cochran's Q (Heterogeneity)	Q	152.274	6.06181e-18

## Sheet: ST1g
Supplementary File 1g: Two-sample Mendelian randomisation models testing the effect of fasting glucose on lung function: leave-one-out analyses
Exposure	Outcome	Removed SNP	Beta	SE	P	Gene	Glycaemic_role	PheWAS
Fasting_glucose	FVC	rs6975024	-0.0710201	0.0442135	0.108208	GCK	GCK is a vital component of glycaemic regulation as it serves as a pancreatic glucose sensor for insulin secretin and phosphorylates glucose to glucose-6-phosphate, the first stage in glycolysis	The relevance of this SNP to blood glucose is supported by the phenotypes with which this SNP has been associated below phenome-wide significance (Supplementary Table 9). Specifically, all of the phenotypes which displayed association with the SNP were glycaemic (fasting glucose, HbA1c, blood sugar, type 2 diabetes, HOMA-B), with only one exception (Birth weight). In summary, this SNP is unlikely…
Fasting_glucose	FEV1	rs6975024	-0.0783075	0.0457536	0.0869878	GCK	GCK is a vital component of glycaemic regulation as it serves as a pancreatic glucose sensor for insulin secretin and phosphorylates glucose to glucose-6-phosphate, the first stage in glycolysis	The relevance of this SNP to blood glucose is supported by the phenotypes with which this SNP has been associated below phenome-wide significance (Supplementary Table 9). Specifically, all of the phenotypes which displayed association with the SNP were glycaemic (fasting glucose, HbA1c, blood sugar, type 2 diabetes, HOMA-B), with only one exception (Birth weight). In summary, this SNP is unlikely…
Fasting_glucose	FVC	rs560887	-0.08393	0.0486188	0.0842956	G6PC2	Glucose-6-Phosphatase Catalytic Subunit 2 is a postulated negative regulator of basal glucose-stimulated insulin secretion and is involved in glucose-6-phosphate hydrolysis	Data from the rs560887 PheWAS supports its biological saliency in glycaemic homeostasis as only glycaemic traits (fasting glucose, HbA1c etc.) were associated with this SNP, with only height the exception (Supplementary Table 12). Height could act as a confounder due to its relationship with lung function, however, this SNP has a plausible direct effect on blood glucose, and thus, it does not see…
Fasting_glucose	FVC	rs17168486	-0.0780548	0.0414953	0.059965	DGKB	Diacylglycerol has important functionality within pancreatic beta cells, with their cellular levels regulated by diacylglycerol kinases such as DGKB. Dysregulation of diacylglycerol kinases is associated with downregulation of insulin secretion.	Furthermore, the PheWAS results supported its biological saliency with FEV1 the only non-glycaemic or diabetes trait associated using the phenome-wide significance threshold (Supplementary Figure 2c, Supplementary Table 8). The association with FEV1 does not likely constitute a direct effect on lung function, which violate the assumptions of MR, rather it is logical its effect on FEV1 is through …
Fasting_glucose	FVC	rs1260326	-0.0832223	0.0428201	0.0519516	GCKR	This gene is the key regulator of glucokinase (of which the significance for glycaemic regulation was described above).	Interestingly, the PheWAS of this SNP was associated with a number of lipids, metabolites and haematological traits, beyond its association with glycaemic GWAS (Supplementary Table 11). This gene has a number of associations, although they are logically related to glycaemic dysregulation. As a result, we conclude that this IV likely acts through glucose, for instance, glycolysis enhanced by GCKR …
Fasting_glucose	FVC	rs7903146	-0.0809619	0.0416197	0.0517414	TCF7L2	TCF7L2 is a well-characterised diabetes risk gene, with a common SNP in this gene exerting the largest effect size (for common variation) on type 2 diabetes	The PheWAS of this SNP also demonstrated a number of anthropometric traits related to adiposity, for example, BMI, wait-to-hip ratio, and fat-free mass, associated with this SNP, although the relationship with diabetes and glycaemic traits was strong (Supplementary Table 9). It is possible that this SNP may also act through these confounding anthropometric phenotypes, particularly as TCF7L2 is do…
Fasting_glucose	FEV1	rs17168486	-0.0813387	0.0413481	0.0491639
Fasting_glucose	FVC	rs11607883	-0.0850346	0.0423929	0.0448703
Fasting_glucose	FVC	rs174576	-0.0847489	0.0421759	0.0444929
Fasting_glucose	FVC	rs16913693	-0.0816661	0.0406414	0.0444913
Fasting_glucose	FVC	rs7651090	-0.0796105	0.0389479	0.0409512
Fasting_glucose	FVC	rs3783347	-0.0864776	0.0420918	0.0399273
Fasting_glucose	FVC	rs11715915	-0.0804813	0.0390977	0.0395452
Fasting_glucose	FVC	rs6072275	-0.0867172	0.0419991	0.0389476
Fasting_glucose	FEV1	rs1260326	-0.0922068	0.0441694	0.0368366
Fasting_glucose	FVC	rs6943153	-0.0881769	0.0421643	0.0365038
Fasting_glucose	FVC	rs11619319	-0.0886693	0.0422681	0.0359242
Fasting_glucose	FVC	rs9368222	-0.0884608	0.0421071	0.0356538
Fasting_glucose	FEV1	rs560887	-0.105199	0.049896	0.0349989
Fasting_glucose	FVC	rs6113722	-0.0888339	0.0421135	0.0349106
Fasting_glucose	FVC	rs882020	-0.0889345	0.0421584	0.0348986
Fasting_glucose	FVC	rs479661	-0.0889574	0.0421525	0.0348263
Fasting_glucose	FVC	rs11195502	-0.0894328	0.0423154	0.0345596
Fasting_glucose	FVC	rs749067	-0.089319	0.0422345	0.034444
Fasting_glucose	FEV1	rs11607883	-0.0922251	0.043581	0.0343298
Fasting_glucose	FEV1	rs7903146	-0.0940037	0.043634	0.0312112
Fasting_glucose	FEV1	rs16913693	-0.092455	0.0429011	0.0311559
Fasting_glucose	FVC	rs4869272	-0.0910019	0.0420933	0.0306252
Fasting_glucose	FVC	rs11558471	-0.0925429	0.0427449	0.0303873
Fasting_glucose	FVC	rs2191349	-0.0932002	0.042918	0.0298869
Fasting_glucose	FEV1	rs3783347	-0.0946752	0.0433712	0.0290427
Fasting_glucose	FEV1	rs983309	-0.0951881	0.0435439	0.0288136
Fasting_glucose	FEV1	rs6072275	-0.0945644	0.0432232	0.028683
Fasting_glucose	FEV1	rs11619319	-0.0955068	0.0435489	0.0283007
Fasting_glucose	FEV1	rs6113722	-0.0957626	0.0434084	0.027378
Fasting_glucose	FEV1	rs11195502	-0.0965547	0.0436394	0.0269283
Fasting_glucose	FEV1	rs479661	-0.0961833	0.0434629	0.026898
Fasting_glucose	FEV1	rs11715915	-0.0879016	0.03969	0.0267804
Fasting_glucose	FVC	rs1280	-0.0928576	0.0418323	0.0264351
Fasting_glucose	FEV1	rs10811661	-0.0968989	0.0436274	0.0263471
Fasting_glucose	FEV1	rs1280	-0.0973286	0.0435778	0.0255197
Fasting_glucose	FVC	rs10814916	-0.0930857	0.0416606	0.025458
Fasting_glucose	FEV1	rs174576	-0.0977323	0.0436749	0.0252392
Fasting_glucose	FEV1	rs7651090	-0.0849645	0.0375726	0.0237382
Fasting_glucose	FEV1	rs6943153	-0.0980596	0.0433625	0.023735
Fasting_glucose	FEV1	rs11603334	-0.0984334	0.04331	0.0230403
Fasting_glucose	FEV1	rs4869272	-0.0987978	0.0434431	0.0229548
Fasting_glucose	FEV1	rs2191349	-0.100699	0.0442736	0.0229377
Fasting_glucose	FEV1	rs749067	-0.0988603	0.0434194	0.0227938
Fasting_glucose	FEV1	rs882020	-0.0990771	0.043251	0.021978
Fasting_glucose	FVC	rs983309	-0.0949935	0.0412255	0.0212092
Fasting_glucose	FEV1	rs9368222	-0.0995363	0.0430074	0.0206458
Fasting_glucose	FEV1	rs10814916	-0.100077	0.0432246	0.0205983
Fasting_glucose	FVC	rs4502156	-0.0964265	0.0415726	0.0203695
Fasting_glucose	FEV1	rs10747083	-0.0999796	0.0428374	0.0195992
Fasting_glucose	FEV1	rs11558471	-0.102486	0.0439009	0.0195703
Fasting_glucose	FVC	rs11708067	-0.0965178	0.041181	0.0190911
Fasting_glucose	FEV1	rs4502156	-0.102098	0.0434718	0.018844
Fasting_glucose	FVC	rs11603334	-0.0963094	0.0399005	0.0157897
Fasting_glucose	FVC	rs3829109	-0.0991955	0.0384645	0.00991204
Fasting_glucose	FEV1	rs3829109	-0.1063	0.0405816	0.0088078
Fasting_glucose	FEV1	rs11708067	-0.110378	0.0405888	0.00653986

## Sheet: ST1h
Supplementary File 1h: Phenome-wide association study of rs17168486 using GWAS atlas summary statistics
GWAS atlas ID	PMID	Year	Domain	Trait	P-value	N	EA	NEA
1157	22581228	2012	Metabolic	Fasting glucose main effect (adjusted for BMI)	1.28e-18	58074	T	C
1156	22581228	2012	Metabolic	Fasting glucose main effect	5.1e-18	58074	T	C
4085	30297969	2018	Endocrine	Type 2 Diabetes	6.9e-17	898130	T	C
4045	30054458	2018	Endocrine	Type 2 Diabetes	2.18e-15	659256	T	C
4086	30297969	2018	Endocrine	Type 2 Diabetes (adjusted for BMI)	7.5e-14	898130	T	C
4176	30718926	2019	Endocrine	Type 2 Diabetes	2.34e-12	191764	T	C
1165	20081858	2010	Metabolic	Fasting glucose	2.59e-11	46186	T	C
4102	29403010	2018	Metabolic	Blood sugar	4.68e-10	93146	T	C
4278	30804560	2019	Respiratory	FEV1	1.24e-07	400102	C	T
4083	28566273	2017	Endocrine	Type 2 Diabetes	1.4e-07	159208	T	C
1211	24509480	2014	Endocrine	Type 2 Diabetes	3.4e-07	110452	T	C
3328	31427789	2019	Endocrine	Diabetes (diagnosed by doctor)	3.63e-07	385420	T	C
4282	30804560	2019	Respiratory	FEV1	6.3e-07	321047	C	T
88	22885922	2012	Endocrine	Type 2 Diabetes	6.9e-07	69033	T	C
4084	28566273	2017	Endocrine	Type 2 Diabetes (adjusted for BMI)	1.2e-06	159208	T	C
3601	31427789	2019	Endocrine	Non-cancer illness code, self-reported: diabetes	1.337e-06	289307	T	C
871	27005778	2016	Metabolic	Glucose	1.42e-06	24679	T	C
4189	31217584	2019	Metabolic	Fasting glucose	2.52599e-05	23911	T	C
4280	30804560	2019	Respiratory	FEV1/FVC ratio	3.63e-05	400102	C	T
4284	30804560	2019	Respiratory	FEV1/FVC ratio	6.95e-05	321047	C	T
4217	31015401	2019	Environmental	Drugs used in diabetes	0.00014	305913	T	C
4279	30804560	2019	Respiratory	FVC	0.000213	400102	C	T
4103	29403010	2018	Hematological	Hemoglobin A1c	0.0002513	42790	T	C
3983	29358691	2018	Endocrine	Type 2 Diabetes	0.0003482	70127	T	C
4162	30531953	2018	Neurological	Focal Epilepsy, other lesion	0.00037	26969	T	C
4283	30804560	2019	Respiratory	FVC	0.000401	321047	C	T
4027	30482948	2018	Psychiatric	Alcohol dependency (full discovery samples)	0.0004191	52848	NA	NA
4281	30804560	2019	Respiratory	PEF	0.000469	345265	C	T
4367	30003307	2018	Cardiovascular	Coronary artery disease in diabetes	0.000579541	15666	C	T
3686	31427789	2019	Endocrine	Diagnoses - secondary ICD10: E11 Type 2 diabetes mellitus	0.0006586	244890	T	C
1212	27398621	2016	Endocrine	Type 2 Diabetes	0.0006677	44414	NA	NA
372	24816252	2014	Metabolic	Amino acid::Cysteine, methionine, SAM, taurine metabolism::cysteine	0.001	7692	C	T
4285	30804560	2019	Respiratory	PEF	0.00101	321047	C	T
4031	30482948	2018	Psychiatric	Alcohol dependency (discovery)	0.001699	46568	NA	NA
3943	28898252	2017	Metabolic	HbA1c	0.002062	123665	T	C
429	24816252	2014	Metabolic	Amino acid::Valine, leucine and isoleucine metabolism::isoleucine	0.002187	7801	T	C
1101	19060910	2009	Metabolic	Glucose - Birth cohorts	0.002556	4763	NA	NA
445	24816252	2014	Metabolic	Carbohydrate::Nucleotide sugars, pentose metabolism::arabinose	0.0028	5889	T	C
3942	28898252	2017	Metabolic	HbA1c	0.00280169	159940	NA	NA
1092	23504502	2013	Neoplasms	Gastric cancer	0.0029762	3869	NA	NA
1167	20081858	2010	Metabolic	HOMA-B	0.00299	36466	C	T
4377	30940143	2019	Cardiovascular	Resting heart rate	0.0031	458969	T	C
4032	30482948	2018	Psychiatric	Alcohol dependency (unrelated individuals)	0.003221	38686	NA	NA
3602	31427789	2019	Endocrine	Non-cancer illness code, self-reported: hypothyroidism/myxoedema	0.003251	289307	T	C
4335	30531941	2018	Activities	Overall activity	0.0035	91105	T	C
3188	31427789	2019	Cardiovascular	Pulse rate (automated reading)	0.003926	361411	T	C
3276	31427789	2019	Activities	Facial ageing	0.003939	354097	C	T
604	24816252	2014	Metabolic	Peptide::gamma-glutamyl::gamma-glutamylleucine	0.003994	7802	T	C
441	24816252	2014	Metabolic	Carbohydrate::Glycolysis, gluconeogenesis, pyruvate metabolism::glucose	0.004137	7773	T	C
1194	21297633	2011	Gastrointestinal	Ulcerative colitis	0.00438	27994	NA	NA
1205	24852370	2014	Metabolic	Serum Thyroid-stimulating hormone level	0.004494	1346	NA	NA
4336	30531941	2018	Activities	Overall activity (conditioning sex and BMI)	0.0045	91105	T	C
470	24816252	2014	Metabolic	Lipid::Bile acid metabolism::taurochenodeoxycholate	0.00486	5716	T	C
796	24816252	2014	Metabolic	::::X-12728	0.004955	537	T	C
4382	30898391	2019	Neoplasms	Epithelial ovarian cancer (high -grade and low-grade serous)	0.005233	5734	T	C
1091	22978509	2012	Psychiatric	Alcohol dependence	0.00555188	3829	C	T
4362	29899525	2018	Activities	Acceleration average	0.0058	91084	T	C
64	27416945	2016	Endocrine	Insulin sensitivity index (adjusted for age, sex)	0.006272	16753	T	C
4338	30531941	2018	Psychiatric	Sleep durataion (conditioning sex and BMI)	0.0064	91105	C	T
1163	20858683	2010	Hematological	Hemoglobin A1C	0.007292	46368	T	C
4337	30531941	2018	Psychiatric	Sleep durataion	0.0076	91105	C	T
4383	30898391	2019	Neoplasms	Epithelial ovarian cancer (high-grade serous)	0.007794	5698	T	C
3354	31427789	2019	Psychiatric	Age stopped smoking	0.008198	94873	T	C
4249	30952852	2019	Psychiatric	Diurnal inactivity duration	0.0084	84757	C	T
241	25772697	2015	Immunological	CD161 on CD4mem	0.0084631	669	C	T
552	24816252	2014	Metabolic	Lipid::Lysolipid::2-stearoylglycerophosphocholine*	0.00927	7730	T	C
102	23449627	2013	Skeletal	Late pubertal growth (female)	0.00982403	4946	T	C
69	26192919	2015	Gastrointestinal	Ulcerative Colitis	0.009923	27432	T	C
4220	31015401	2019	Environmental	Antihypertensives	0.01	152380	T	C
4349	30586722	2018	Cardiovascular	Heart failure	0.0100304	394156	T	C
3243	31427789	2019	Nutritional	Dried fruit intake	0.01061	351952	C	T
4546	31676860	2019	Neurological	Left caudal anterior cingulate	0.01079	21821	T	C
4507	31676860	2019	Neurological	Cerebellar vermal lobules I V	0.01146	19629	T	C
3262	31427789	2019	Psychiatric	Average weekly red wine intake	0.01155	274058	T	C
76	23455636	2013	Ophthalmological	Neovascular disease	0.011699	54938	NA	NA
3598	31427789	2019	Cardiovascular	Non-cancer illness code, self-reported: angina	0.01172	289307	T	C
138	23754948	2013	Metabolic	Waist-hip ratio (male)	0.012	34629	T	C
417	24816252	2014	Metabolic	Amino acid::Urea cycle; arginine-, proline-, metabolism::proline	0.0122	7816	T	C
3491	31427789	2019	Nutritional	Cereal type: Muesli	0.01245	319477	C	T
2013	22907730	2013	Psychiatric	Response following treatment of MDD subjects	0.01269	499	NA	NA
448	24816252	2014	Metabolic	Cofactors and vitamins::Ascorbate and aldarate metabolism::threonate	0.01347	7782	C	T
3548	31427789	2019	Body Structures	Mouth/teeth dental problems: Toothache	0.01359	385026	C	T
4679	BioRxiv: https://doi.org/10.1101/288587	2019	Neurological	Genu of corpus callosum axial diusivities	0.01363	17706	T	C
3676	31427789	2019	Skeletal	Diagnoses - main ICD10: M16 Osteoarthritis of hip	0.01376	300791	C	T
532	24816252	2014	Metabolic	Lipid::Lysolipid::1-arachidonoylglycerophosphoinositol*	0.01397	7797	T	C
3815	20045101	2010	Immunological	CD4:CD8 lymphocyte ratio	0.0141	2538	NA	NA
3415	31427789	2019	Cognitive	Reaction time test - Mean time to correctly identify matches	0.01434	383748	C	T
431	24816252	2014	Metabolic	Amino acid::Valine, leucine and isoleucine metabolism::leucine	0.01435	7799	T	C
4455	31676860	2019	Neurological	Left lingual	0.01458	19629	C	T
74	23455636	2013	Ophthalmological	Age-related Macular Degeneration	0.01461	59462	NA	NA
4608	31676860	2019	Neurological	Cerebellar vermal lobules I V	0.01461	21821	T	C
4179	31217584	2019	Immunological	Mean corpuscular hemoglobin concentration	0.0156942	19803	T	C
3195	31427789	2019	Environment	Average total household income before tax	0.01676	332594	T	C
283	25772697	2015	Immunological	CD4:%Treg(39+73-)	0.0176786	669	C	T
4569	31676860	2019	Neurological	Left rostral anterior cingulate	0.0178	21821	T	C
1133	27918534	2017	Metabolic	Ratio of visceral-tosubcutaneous adipose tissue volume (adjusted for BMI, male)	0.018	8374	NA	NA
4550	31676860	2019	Neurological	Left fusiform	0.0181	21821	T	C
3966	29273806	2018	Respiratory	Asthma (fixed effect model)	0.0183547	142486	T	C
3967	29273806	2018	Respiratory	Asthma (random effect model)	0.0183547	142486	T	C
3310	31427789	2019	Activities	Age started wearing glasses or contact lenses	0.01898	332074	C	T
4361	30061737	2018	Cardiovascular	Atrial fibrillation	0.01913	1030836	T	C
471	24816252	2014	Metabolic	Lipid::Bile acid metabolism::taurocholate	0.01914	4032	T	C
638	24816252	2014	Metabolic	Xenobiotics::Sugar, sugar substitute, starch::erythritol	0.01928	7776	T	C
65	27416945	2016	Endocrine	Insulin sensitivity index (adjusted for age, sex. Bmi)	0.01978	16753	T	C
3754	31427789	2019	Psychiatric	Traumatic events - Felt very upset when reminded of stressful expresince in past month	0.01978	126627	C	T
3944	28898252	2017	Metabolic	HbA1c	0.0198	20838	T	C
4203	31217584	2019	Metabolic	End stage renal disease	0.0204063	33061	C	T
516	24816252	2014	Metabolic	Lipid::Long chain fatty acid::adrenate (22:4n6)	0.02088	7778	T	C
2014	22907730	2013	Psychiatric	Response following 8-week treatment of MDD subjects	0.02093	398	NA	NA
3791	30804565	2019	Psychiatric	Ease of getting up in the morning	0.02098	385949	C	T
140	23754948	2013	Metabolic	Waist-hip ratio (male, adjusted for BMI)	0.021	34629	T	C
4319	30643256	2019	Activities	Life satisfaction (univariate)	0.0219634	80852	C	T
3968	29273806	2018	Respiratory	Asthma (fixed effect model)	0.0220786	127669	T	C
3969	29273806	2018	Respiratory	Asthma (random effect model)	0.0220786	127669	T	C
251	25772697	2015	Immunological	CD27 on CD8 T	0.0220992	669	C	T
771	24816252	2014	Metabolic	::::X-12329	0.02347	867	T	C
4052	28757204	2017	Metabolic	25-Hydroxyvitamin D level	0.023525	42274	C	T
555	24816252	2014	Metabolic	Lipid::Medium chain fatty acid::caprate (10:0)	0.0238	7799	T	C
1073	19915575	2009	Neurological	Parkinson disease	0.02445	5691	C	T
1084	19875614	2010	Hematological	Hemoglobin A1C level	0.02465	1304	NA	NA
1112	27918534	2017	Metabolic	Visceral sdipose tissue volume (male)	0.025	8738	NA	NA
1085	20622878	2010	Connective Tissue	Behcet disease	0.0253044	2493	C	T
717	24816252	2014	Metabolic	::::X-11529	0.02547	6664	T	C
4092	29844566	2018	Cognitive	Reaction time	0.0259896	330069	C	T
115	22982992	2012	Metabolic	Variability of Body Mass Index	0.026	133154	T	C
14	28439101	2017	Psychiatric	Posttraumatic stress disorder	0.0263	9537	T	C
842	24816252	2014	Metabolic	::::X-14625	0.02743	7511	T	C
3386	31427789	2019	Activities	Work/job satisfaction	0.02804	128621	T	C
4602	31676860	2019	Neurological	Right superior frontal	0.02873	21821	T	C
3550	31427789	2019	Cardiovascular	Vascular/heart problems diagnosed by doctor: Angina	0.02885	385699	T	C
1127	27918534	2017	Metabolic	Visceral adipose tissue sttenutation (male)	0.029	8738	NA	NA
980	27989323	2017	Immunological	Interferon-gamma	0.02908	7701	T	C
4353	30287856	2018	Infection	Tuberculosis	0.02926	2053	T	C
380	24816252	2014	Metabolic	Amino acid::Glycine, serine and threonine metabolism::glycine	0.02928	7802	C	T
3594	31427789	2019	Activities	Mineral and other dietary supplements: Calcium	0.02948	385261	C	T
590	24816252	2014	Metabolic	Nucleotide::Pyrimidine metabolism, uracil containing::uridine	0.02969	7800	C	T
3213	31427789	2019	Activities	Duration walking for pleasure	0.02982	275181	T	C
289	25772697	2015	Immunological	CD4:%Act(25+127+)	0.0298432	669	C	T
2053	24084763	2013	Neoplasms	Advanced adenoma	0.03015	1406	A	G
75	23455636	2013	Ophthalmological	Geographic atrophy	0.030228	48550	NA	NA
3929	28749367	2017	Cardiovascular	QT interval	0.03045	22158	T	C
1138	27015805	2016	Mortality	Mother's age at death	0.031	75244	T	C
18	20418890	2010	Psychiatric	Former versus current smokers	0.03184	41278	C	T
2049	26962152	2016	Gastrointestinal	Periodontal complex trait 4	0.032233	975	T	C
3335	31427789	2019	Psychiatric	Light smokers, at least 100 smokes in lifetime	0.03228	105610	C	T
546	24816252	2014	Metabolic	Lipid::Lysolipid::1-stearoylglycerophosphocholine	0.03252	7817	T	C
1090	22978509	2012	Psychiatric	Alcohol dependence	0.0331059	2668	C	T
3663	31427789	2019	Neoplasms	Cancer register - Behaviour of cancer tumour: Malignant, primary site	0.03362	61413	T	C
3643	31427789	2019	Environment	Illnesses of mother: Chronic bronchitis/emphysema	0.03373	367939	T	C
4468	31676860	2019	Neurological	Left rostral anterior cingulate	0.03411	19629	T	C
4556	31676860	2019	Neurological	Left lingual	0.0345	21821	C	T
3960	28990592	2017	Reproduction	Gestational weight gain (maternal, total)	0.03493	10555	C	T
382	24816252	2014	Metabolic	Amino acid::Glycine, serine and threonine metabolism::N-acetylthreonine	0.03504	6909	T	C
4122	29403010	2018	Metabolic	Gamma-glutamyl transferase	0.03505	118309	T	C
3494	31427789	2019	Nutritional	Coffee type: Ground coffee (include espresso, filter etc)	0.03536	303811	C	T
3471	31427789	2019	Metabolic	Impedance measures - Trunk predicted mass	0.03556	379469	T	C
4501	31676860	2019	Neurological	Right superior frontal	0.03557	19629	T	C
3366	31427789	2019	Reproduction	Age at menopause (last menstrual period) (female)	0.03597	119160	T	C
4165	30531953	2018	Neurological	Juvenile Myoclonic Epilepsy (JME)	0.036	25395	T	C
3229	31427789	2019	Psychiatric	Getting up in morning	0.03655	385494	C	T
4028	30482948	2018	Psychiatric	Alcohol dependency (fixed effect model for unrelated genotyped individuals)	0.0371577	34556	T	C
3421	31427789	2019	Cognitive	Pairs matching test - Time to complete round	0.03717	93074	C	T
466	24816252	2014	Metabolic	Lipid::Bile acid metabolism::glycochenodeoxycholate	0.03732	7087	T	C
1013	27989323	2017	Immunological	Vascular endothelial growth factor	0.03761	7118	T	C
4258	30946739	2019	Activities	Facial attractiveness (male-coder, male samples)	0.03793	1792	C	T
3303	31427789	2019	Psychiatric	Able to confide	0.03838	374820	C	T
3529	31427789	2019	Nutritional	Never eat eggs, dairy, wheat, sugar: Wheat products	0.03907	384986	C	T
3631	31427789	2019	Environment	Illnesses of father: Bowel cancer	0.03926	355137	T	C
541	24816252	2014	Metabolic	Lipid::Lysolipid::1-oleoylglycerophosphoethanolamine	0.03977	7749	T	C
285	25772697	2015	Immunological	CD4:%Treg(39+)	0.0399257	669	C	T
457	24816252	2014	Metabolic	Cofactors and vitamins::Vitamin B6 metabolism::pyridoxate	0.03996	7703	C	T
815	24816252	2014	Metabolic	Lipid::Fatty acid amide::X-13183--stearamide	0.04008	2503	T	C
649	24816252	2014	Metabolic	Xenobiotics::Xanthine metabolism::theophylline	0.04032	7393	T	C
830	24816252	2014	Metabolic	::::X-14056	0.04043	7259	T	C
3219	31427789	2019	Activities	Time spent watching television (TV)	0.04065	365236	T	C
609	24816252	2014	Metabolic	Peptide::gamma-glutamyl::gamma-glutamylvaline	0.04074	7753	T	C
3634	31427789	2019	Environment	Illnesses of father: Diabetes	0.04126	355137	T	C
66	27416945	2016	Endocrine	Insulin sensitivity index (combined influence of the genotype effect adjusted for BMI and the interaction effect between the genotype and BMI on ISI)	0.0414	16753	T	C
3259	31427789	2019	Nutritional	Major dietary changes in the last 5 years	0.04249	385587	T	C
712	24816252	2014	Metabolic	::::X-11483	0.04253	4608	T	C
4445	31676860	2019	Neurological	Left caudal anterior cingulate	0.04302	19629	T	C
4029	30482948	2018	Psychiatric	Alcohol dependency (random effect model for unrelated genotyped individuals)	0.0430332	34556	NA	NA
473	24816252	2014	Metabolic	Lipid::Bile acid metabolism::taurolithocholate 3-sulfate	0.04361	6904	T	C
467	24816252	2014	Metabolic	Lipid::Bile acid metabolism::glycocholate	0.04404	5995	T	C
3470	31427789	2019	Metabolic	Impedance measures - Trunk fat-free mass	0.04511	379507	T	C
3770	31427789	2019	Psychiatric	Depression - Trouble falling or staying asleep. or sleeping too much	0.04568	126545	T	C
636	24816252	2014	Metabolic	Xenobiotics::Food component, Plant::stachydrine	0.04619	6745	T	C
4740	BioRxiv: https://doi.org/10.1101/288648	2019	Neurological	Cingulum (hippocampus) radial diusivities	0.04673	17706	T	C
752	24816252	2014	Metabolic	::::X-12063	0.04693	7197	T	C
3985	29497042	2018	Cardiovascular	Heart rate recovery at 10 secnds	0.047	58818	C	T
3306	31427789	2019	Reproduction	Ever had same-sex intercourse	0.04714	349459	T	C
783	24816252	2014	Metabolic	::::X-12524	0.04734	7809	C	T
4483	31676860	2019	Neurological	Right isthmus cingulate	0.04734	19629	T	C
213	25772697	2015	Immunological	Lymph:%CD4	0.0480748	669	T	C
4567	31676860	2019	Neurological	Left precentral	0.04813	21821	T	C
762	24816252	2014	Metabolic	::::X-12212	0.04862	4566	T	C
1224	25607358	2015	Neurological	Mean Putamen	0.04872	13171	T	C
4048	29534260	2018	Skeletal	Plantar fasciitis	0.04909	102503	NA	NA
364	24816252	2014	Metabolic	Amino acid::Alanine and aspartate metabolism::alanine	0.04929	7788	T	C
4259	30946739	2019	Activities	Facial attractiveness (female-coder, male samples)	0.04978	1792	C	T

[truncated: 6 more sheets: ST1i, ST1j, ST1k, ST1l, ST1m, ST1n]
