# Supplementary material for: Genetic association and causal inference converge on hyperglycaemia as a modifiable factor to improve lung function
Source: eLife journal article supplement (doi:10.7554/elife.63115), 2021-03-15
Supplement: supp [file elife-63115-supp-v1.zip › elife_poa_e63115_Supplementary_File_2.xlsx]

## Sheet: Index
Supplementary File 2
Supplementary File 2a: Candidate PES gene-set identification for FEV1 and FVC - FDR < 0.1 (Conservative Genic Boundaries)
Supplementary File 2b: Candidate PES gene-set identification for FEV1 and FVC - FDR < 0.1 (Liberal Genic Boundaries)
Supplementary File 2c: FDA approved DrugBank compounds with overrepresented targets in a PES candidate gene-set
Supplementary File 2d: Evaluation of FDA approved DrugBank compounds with overrepresented targets in a PES candidate gene-set
Supplementary File 2e: Single drug-gene interactions in the ALK pathway gene-set
Supplementary File 2f: Single drug-gene interactions in the Basal cell carcinoma gene-set
Supplementary File 2g: Single drug-gene interactions in the Dilated cardiomyopathy gene-set
Supplementary File 2h: Single drug-gene interactions in the Hedgehog signalling pathway gene-set (KEGG)
Supplementary File 2i: Single drug-gene interactions in the Pathways in cancer gene-set
Supplementary File 2j: Single drug-gene interactions in the TGF-beta signalling pathway gene-set
Supplementary File 2k: Single drug-gene interactions in the ECM (NABA matrisome) gene-set
Supplementary File 2l: Single drug-gene interactions in the BMP pathway gene-set
Supplementary File 2m: Single drug-gene interactions in the Hedgehog signalling pathway (PID) gene-set
Supplementary File 2n: Single drug-gene interactions in the Circadian clock gene-set
Supplementary File 2o: Single drug-gene interactions in the Class b2 secretin family receptors gene-set
Supplementary File 2p: Single drug-gene interactions in the Extension of telomeres gene-set

## Sheet: Table_legends
Supplementary Files 2a-b
Gene-set	Name of gene-set
NGENES	Number of genes, specifies the number of genes from the set with at least one overlapping SNP at the specified P value threshold
BETA	MAGMA gene-set association beta estimate
SE	Standard error of the MAGMA beta estimate
P	Gene-set association P value
FDR	FDR corrected P value
P threshold	The P value threshold at which SNPs were included to calculate the gene-based test statistic
Spirometry_measure	Spirometry measure tested
Supplementary File 2c
Compound	Name of compound with overrepresented targets in at least one PES gene-set
DrugBank_ID	DrugBank ID for compound
ATC code	ATC code (level 3) for compound
PES gene-set	Candidate PES gene-set in which the compound has overrepresented targets
Supplementary File 2d
Compound	Name of compound
Adverse Respiratory Effects (Drugs.com)	Reported respiratory adverse effects (Drugs.com)
Adverse Respiratory Effects (Medscape)	Reported respiratory adverse effects (Medscape)
SIDER v4.1	Reported adverse effects - SIDER v4.1: (Includes dyspnea, Breath sounds abnormal, orthopnea, shallow breathing, respiratory distress, respiratory depression, respiratory rate derecreased)
Other (articles and published data)	Evidence for or against use
Allowed pediatric age use	Age allowed for paediatric indication
Form of administration	Administration method
Rank (Level)	Level 1: An oral or parenteral formulation, no documented respiratory side effects, with positive evidence of prior use for lung function in the literature. Level 2: An oral or parenteral formulation, no documented or rare (<1%) respiratory side effects, with/without positive evidence but no negative evidence of prior use for lung function in the literature. Level 3: An oral or parenteral formula…
Additional comments	Any additional comments relating to use
Supplementary Files 2e-p
search_term	Gene searched in the DGIdb database
match_term	Gene matched in the DGIdb database
match_type	Denotes whether the match between the search term and the match term is definite
gene	The gene symbol
drug	Name of the drug which putatively interacts with the gene
interaction_types	The type of drug-gene interaction (if known)
sources	Database sources which support the drug-gene interaction
pmids	Literature evidence (PMID) which supports the drug-gene interaction

## Sheet: ST2a
Supplementary File 2a: Candidate PES gene-set identification for FEV1 and FVC - FDR < 0.1 (Conservative Genic Boundaries)
Gene-set	NGENES	BETA	SE	P	FDR	P threshold	Spirometry_measure
PID_HEDGEHOG_2PATHWAY	22	0.973	0.204	9.3e-07	0.00383181	P < 0.5	FEV1
KEGG_PATHWAYS_IN_CANCER	314	0.258	0.0693	9.77e-05	0.0925245	P < 1	FVC
KEGG_TGF_BETA_SIGNALING_PATHWAY	84	0.509	0.139	0.00012252	0.0925245	P < 1	FVC
PID_HEDGEHOG_2PATHWAY	22	0.959	0.265	0.00015167	0.0925245	P < 1	FVC
PID_HEDGEHOG_2PATHWAY	22	0.812	0.209	4.99e-05	0.0925245	P < 0.5	FVC
BIOCARTA_ERYTH_PATHWAY	12	0.567	0.157	0.00015724	0.0925245	P < 0.05	FVC
BIOCARTA_NKT_PATHWAY	8	0.694	0.187	0.00010404	0.0925245	P < 0.005	FVC
BIOCARTA_ALK_PATHWAY	37	0.706	0.199	0.00018847	0.0970385	P < 1	FVC

## Sheet: ST2b
Supplementary File 2b: Candidate PES gene-set identification for FEV1 and FVC - FDR < 0.1 (Liberal Genic Boundaries)
Gene-set	NGENES	BETA	SE	P	FDR	P threshold	Spirometry_measure
PID_HEDGEHOG_2PATHWAY	22	1.01	0.225	3.45e-06	0.0142185	P < 0.5	FEV1
KEGG_HEDGEHOG_SIGNALING_PATHWAY	55	0.819	0.191	8.86e-06	0.0182615	P < 1	FEV1
PID_HEDGEHOG_2PATHWAY	22	1.27	0.312	2.4e-05	0.0330232	P < 1	FEV1
KEGG_BASAL_CELL_CARCINOMA	55	0.598	0.15	3.28e-05	0.0337943	P < 0.5	FEV1
KEGG_HEDGEHOG_SIGNALING_PATHWAY	55	0.527	0.135	4.58e-05	0.0377194	P < 0.5	FEV1
KEGG_TGF_BETA_SIGNALING_PATHWAY	84	0.439	0.116	8.15e-05	0.0398767	P < 0.5	FEV1
REACTOME_EXTENSION_OF_TELOMERES	22	0.514	0.137	8.59e-05	0.0398767	P < 0.05	FEV1
KEGG_PATHWAYS_IN_CANCER	314	0.306	0.0817	8.94e-05	0.0398767	P < 1	FEV1
KEGG_DILATED_CARDIOMYOPATHY	85	0.59	0.158	9.54e-05	0.0398767	P < 1	FEV1
KEGG_BASAL_CELL_CARCINOMA	55	0.704	0.189	9.68e-05	0.0398767	P < 1	FEV1
PID_BMP_PATHWAY	40	0.786	0.226	0.00024856	0.093097	P < 1	FEV1
KEGG_HEDGEHOG_SIGNALING_PATHWAY	55	0.767	0.135	6.66e-09	2.74e-05	P < 0.5	FVC
PID_BMP_PATHWAY	40	1.17	0.237	4.08e-07	0.000711373	P < 1	FVC
KEGG_HEDGEHOG_SIGNALING_PATHWAY	55	0.914	0.187	5.18e-07	0.000711373	P < 1	FVC
BIOCARTA_ALK_PATHWAY	37	1.09	0.245	4.57e-06	0.00332872	P < 1	FVC
PID_BMP_PATHWAY	40	0.758	0.172	5.39e-06	0.00332872	P < 0.5	FVC
KEGG_PATHWAYS_IN_CANCER	314	0.355	0.0808	5.43e-06	0.00332872	P < 1	FVC
PID_HEDGEHOG_2PATHWAY	22	0.548	0.125	5.66e-06	0.00332872	P < 0.05	FVC
PID_HEDGEHOG_2PATHWAY	22	0.946	0.22	8.93e-06	0.00459967	P < 0.5	FVC
KEGG_TGF_BETA_SIGNALING_PATHWAY	84	0.456	0.108	1.21e-05	0.00551897	P < 0.5	FVC
REACTOME_CIRCADIAN_CLOCK	50	0.323	0.0804	3e-05	0.0120038	P < 0.05	FVC
KEGG_PATHWAYS_IN_CANCER	314	0.241	0.0603	3.2e-05	0.0120038	P < 0.5	FVC
REACTOME_CIRCADIAN_CLOCK	50	0.531	0.134	3.9e-05	0.0133814	P < 0.5	FVC
KEGG_BASAL_CELL_CARCINOMA	55	0.328	0.0852	5.87e-05	0.0185907	P < 0.05	FVC
KEGG_BASAL_CELL_CARCINOMA	55	0.533	0.14	7.25e-05	0.0213345	P < 0.5	FVC
REACTOME_CLASS_B_2_SECRETIN_FAMILY_RECEPTORS	52	0.349	0.0924	8.08e-05	0.0221865	P < 0.005	FVC
PID_HEDGEHOG_2PATHWAY	22	1.11	0.296	8.68e-05	0.0223528	P < 1	FVC
REACTOME_CIRCADIAN_CLOCK	50	0.71	0.19	9.53e-05	0.0230868	P < 1	FVC
KEGG_HEDGEHOG_SIGNALING_PATHWAY	55	0.296	0.0821	0.00015363	0.0351642	P < 0.05	FVC
PID_HEDGEHOG_2PATHWAY	20	0.47	0.132	0.00018527	0.0401743	P < 0.005	FVC
NABA_MATRISOME	985	0.169	0.0383	0.0002284	0.0470504	P < 1	FVC
REACTOME_NEGATIVE_REGULATION_OF_FGFR_SIGNALING	36	0.607	0.176	0.00028223	0.0553708	P < 0.5	FVC
WNT_SIGNALING	87	0.359	0.106	0.00035156	0.0658376	P < 0.5	FVC
KEGG_P53_SIGNALING_PATHWAY	62	0.261	0.0775	0.00037313	0.0668389	P < 0.05	FVC
KEGG_TGF_BETA_SIGNALING_PATHWAY	84	0.49	0.146	0.00040234	0.0675911	P < 1	FVC
REACTOME_DOWNREGULATION_OF_SMAD2_3_SMAD4_TRANSCRIPTIONAL_ACTIVITY	18	0.862	0.257	0.00041014	0.0675911	P < 0.5	FVC
KEGG_MAPK_SIGNALING_PATHWAY	251	0.288	0.0869	0.00045612	0.0709739	P < 1	FVC
REACTOME_RORA_ACTIVATES_CIRCADIAN_EXPRESSION	22	0.954	0.288	0.00046512	0.0709739	P < 1	FVC
REACTOME_BMAL1_CLOCK_NPAS2_ACTIVATES_CIRCADIAN_EXPRESSION	34	0.785	0.241	0.00057161	0.0841083	P < 1	FVC
REACTOME_CLASS_B_2_SECRETIN_FAMILY_RECEPTORS	81	0.22	0.068	0.00062456	0.0867686	P < 0.05	FVC
HALLMARK_EPITHELIAL_MESENCHYMAL_TRANSITION	189	0.343	0.106	0.00063181	0.0867686	P < 1	FVC
PID_HDAC_CLASSII_PATHWAY	31	0.804	0.253	0.0007385	0.0950399	P < 1	FVC
HALLMARK_TGF_BETA_SIGNALING	52	0.49	0.154	0.0007473	0.0950399	P < 0.5	FVC
KEGG_BASAL_CELL_CARCINOMA	55	0.593	0.187	0.00076806	0.0950399	P < 1	FVC
BIOCARTA_NKT_PATHWAY	13	0.458	0.145	0.00078431	0.0950399	P < 0.005	FVC

## Sheet: ST2c
Supplementary File 2c: FDA approved DrugBank compounds with overrepresented targets in a PES candidate gene-set
Compound	DrugBank_ID	ATC code	PES gene-set
Nicardipine	DB00622	C08CA04	Dilated Cardiomyopathy
Sunitinib	DB01268	L01XE04	Pathways in Cancer
Imatinib	DB00619	L01XE01	Pathways in Cancer
Sorafenib	DB00398	L01XE05	Pathways in Cancer
Cladribine	DB00242	L01BB04, L04AA40	Extension of Telomeres
Isradipine	DB00270	C08CA03	Dilated Cardiomyopathy
Bexarotene	DB00307	L01XX25	Pathways in Cancer
Arsenic trioxide	DB01169	L01XX27	Pathways in Cancer
Verapamil	DB00661	C08DA01	Dilated Cardiomyopathy
Amlodipine	DB00381	C08CA01	Dilated Cardiomyopathy
Felodipine	DB01023	C08CA02	Dilated Cardiomyopathy
Nisoldipine	DB00401	C08CA07	Dilated Cardiomyopathy
Pentosan	DB00686	C05BA04, G04BX15	Extracellular matrix
Acetylsalicylic acid	DB00945	A01AD05, B01AC06, N02BA01	Pathways in Cancer
Isoprenaline	DB01064	C01CA02, R03AB02	Pathways in Cancer
Minocycline	DB01017	J01AA08, A01AB23	Pathways in Cancer
Nifedipine	DB01115	C08CA05	Dilated Cardiomyopathy
Mesalazine	DB00244	A07EC02	Pathways in Cancer
Doconexent	DB03756	N/A	Circadian Clock
Pramlintide	DB01278	A10BX05	Class B2 Secretin family receptors
Glucagon (recombinant)	DB00040	H04AA01	Class B2 Secretin family receptors
Magnesium sulfate	DB00653	A06AD04, A12CC02, B05XA05, D11AX05, V04CC02	Dilated Cardiomyopathy
Calcium Citrate	DB11093	A12AA13	Dilated Cardiomyopathy
Ibutilide	DB00308	C01BD05	Dilated Cardiomyopathy
Dronedarone	DB04855	C01BD07	Dilated Cardiomyopathy
Spironolactone	DB00421	C03DA01	Dilated Cardiomyopathy
Nimodipine	DB00393	C08CA06	Dilated Cardiomyopathy
Clevidipine	DB04920	C08CA16	Dilated Cardiomyopathy
Antithymocyte	DB00098	L04AA04	Dilated Cardiomyopathy
Menthol	DB00825	N/A	Dilated Cardiomyopathy
Fish oil	DB13961	N/A	Dilated Cardiomyopathy
Ethanol	DB00898	V03AZ01	Dilated Cardiomyopathy
Sucralfate	DB00364	A02BX02	Extracellular matrix
Vitamin C	DB00126	A11G	Extracellular matrix
Calcium	DB01373	A12A	Extracellular matrix
Zinc	DB01593	A12CB	Extracellular matrix
Urokinase	DB00013	B01AD04	Extracellular matrix
Heparin	DB01109	C05BA03, B01AB51, S01XA14	Extracellular matrix
Aflibercept	DB08885	L01XX44, S01LA05	Extracellular matrix
Rilonacept	DB06372	L04AC04	Extracellular matrix
Collagenase clostridium histolyticum	DB00048	M09AB02	Extracellular matrix
Copper	DB09130	N/A	Extracellular matrix
Prothrombin	DB11311	N/A	Extracellular matrix
L-Glutamine	DB00130	N/A	Extracellular matrix
Thrombin	DB11300	N/A	Extracellular matrix
Turoctocog	DB09109	N/A	Extracellular matrix
Olopatadine	DB00768	R01AC08, S01GX09	Extracellular matrix
Amlexanox	DB01025	R03DX01, A01AD07	Extracellular matrix
Ocriplasmin	DB08888	S01XA22	Extracellular matrix
Rosiglitazone	DB00412	A10BG02	Pathways in Cancer
Fostamatinib	DB12010	B02BX09	Pathways in Cancer
Heparin	DB01109	C05BA03, B01AB51, S01XA14	Pathways in Cancer
Pentosan	DB00686	C05BA04, G04BX15	Pathways in Cancer
Tazarotene	DB00799	D05AX05	Pathways in Cancer
Etretinate	DB00926	D05BB01	Pathways in Cancer
Acitretin	DB00459	D05BB02	Pathways in Cancer
Adapalene	DB00210	D10AD03	Pathways in Cancer
Alitretinoin	DB00523	D11AH04, L01XX22	Pathways in Cancer
Pazopanib	DB06589	L01XE11	Pathways in Cancer
Bosutinib	DB06616	L01XE14	Pathways in Cancer
Regorafenib	DB08896	L01XE21	Pathways in Cancer
Ponatinib	DB08901	L01XE24	Pathways in Cancer
Nintedanib	DB09079	L01XE31	Pathways in Cancer
Midostaurin	DB06595	L01XE39	Pathways in Cancer
Brigatinib	DB12267	L01XE43	Pathways in Cancer
Aflibercept	DB08885	L01XX44, S01LA05	Pathways in Cancer
Doconexent	DB03756	N/A	Pathways in Cancer
Fish oil	DB13961	N/A	Pathways in Cancer

## Sheet: ST2d
Supplementary File 2d: Evaluation of FDA approved DrugBank compounds with overrepresented targets in a PES candidate gene-set
Compound	Adverse Respiratory Effects (Drugs.com)	Adverse Respiratory Effects (Medscape)	Adverse Respiratory Effects (Summary of Product Characteristics)	SIDER v4.1 (Includes dyspnea, Breath sounds abnormal, orthopnea, shallow breathing, respiratory distress, respiratory depression, respiratory rate derecreased)	Others (articles and published data)	Allowed Pediatric Age Use	Form of Administration	Rank (Level)	Additional Comments	KEY: Level 1: An oral or parenteral formulation, no documented respiratory side effects, with positive evidence of prior use for lung function in the literature. Level 2: An oral or parenteral formulation, no documented or rare (<1%) respiratory side effects, with/without positive evidence but no negative evidence of prior use for lung function in the literature. Level 3: An oral or parenteral fo…
Pramlintide	None recorded	None recorded	None recorded	None recorded		No data in children	Parenteral	2	Available as SC formulations.
Glucagon (recombinant)	If nasal: Dyspnea 1% to 10% Recombinant: Not reported to cause dyspnea	Respiratory distress	None recorded	None recorded		Infants and children	Oral, parenteral and intranasal	2 (3 for nasal formulation)
Magnesium sulfate	✤Intravenous magnesium may improve pulmonary function in patients with asthma through causing relaxation of bronchial smooth muscle and irrespective of serum magnesium concentration. ✤Off-lable use: The Global Initiative for Asthma (GINA): Global Strategy for Asthma Management and Prevention guidelines recommend magnesium sulfate be considered for patients with severe exacerbations not responding…	Respiratory paralysis	Hypermagnesaemia characterised by respiratory depression	Respiratory depression	The infusion of MgSO4 also improved dyspnea and piping rales in asthmatic patients with a severe attack. Dyspnea decreased within two to five minutes after the infusion had begun. DOI: 10.1001/jama.1987.03390080066032 CT: In which moderate to severe asthamatic patients were randomized to receive either a nebulized MgSO4 or placebo of nebulized saline. The MgSO4 group had significantly more improv…	Infants and children	Oral and Parenteral but only the IV formulation is used for this purpose.	1	It has a positive impact on both respiratory functions and dyspnea when considered as both IV and nebulized administrations, and only resp depression, fatal cardiovascular arrest and/or respiratory paralysis can be caused in overdoses and hypermagnesemia situations. It is recommended to have ECG monitoring if administered intravenously.
Calcium Citrate	None recorded	None recorded	NA	None recorded		Infants and children	Oral	2	Calcium chloride is only available as IV formulation
Calcium chloride						Infants and children	Parenteral only
Calcium Gluconate						Infants and children	Oral, parenteral and inhalation
Calcium (Other bases)						Children	Oral
Spironolactone	None recorded	None recorded	None recorded	None recorded	It was observed that patients with mild dyspnea (NYHA II) could benefit from spironolactone treatment; doi.org/10.1016/j.cardfail.2003.10.012	Infants and children	Oral	1
Amlodipine	Dyspnea (≤2%)	Dyspnea <1%	Dyspnea: Uncommon	Dyspnea	doi.org/10.1177/000992288702600802 Clevidipine and dyspnea relief; doi.org/10.1016/j.ebiom.2016.06.027 CCBs may be beneficial for lung function improvement in asthma; doi: https://doi.org/10.1016/j.anai.2017.08.013 No effect; 10.1046/j.0306-5251.2001.01560.x	Children ≥ 6 years of age	Oral	2
Felodipine	dyspnea <1%	None recorded	None recorded	Dyspnea	CT: https://doi.org/10.1016/S0002-9149(99)80352-X https://doi.org/10.1016/0002-9149(94)90929-6 CCBs may be beneficial for lung function improvement in asthma; doi: https://doi.org/10.1016/j.anai.2017.08.013 Clevidipine and dyspnea relief; doi.org/10.1016/j.ebiom.2016.06.027	Children ≥ 6 years of age	Oral	2
Isradipine	Dyspnea (3%)	Dyspnea (1-3%)	Dysnpnea is common	Dyspnea 1.8% - 2.2%	doi.org/10.1006/pulp.1995.1016 https://doi.org/10.1093/ajh/4.2.197S	Children	Oral	3
Nicardipine	Dyspnea <1%	None recorded	Dyspnea (unknown freq)	Dyspnea: 0.7%	https://www.ncbi.nlm.nih.gov/pmc/articles/PMC4156995/pdf/CRICC2014-242703.pdf	Infants and children	Oral and Parenteral	2
Nifedipine	Dyspnea (≤2%)	Dyspnea (6%)	Dyspnea (unknown freq)	Dyspnea: postmarketing, 1.7% - 6%	https://doi.org/10.1016/0002-9149(94)90929-6	Children	Oral	3
Nimodipine	None recorded	None recorded	None recorded	Dyspnea: 1.22%	10.1097/00006123-200011000-00048	No data in children	Oral	3
Nisoldipine	Dyspnea <1%	None recorded	Dyspnea <1%	Dyspnea	Some reports of improvement in dyspnea at rest and during exercise in pateitns with CHF; https://doi.org/10.1002/j.1552-4604.1993.tb03902.x	No data in children	Oral	2
Clevidipine	Dyspnea <1%	None recorded	Dyspnea 1.5% Dyspnea <1%	Dyspnea	Clevidipine and dyspnea relief; doi.org/10.1016/j.ebiom.2016.06.027	No data in children	Parenteral	2	Only available as IV formulation and should be administered under aseptic technique.
Verapamil	Dyspnea 1%	Dyspnea 1% - 10 %	Dyspnea (unknown freq)	Dyspnea: postmarketing	Associated with dyspnea: doi: https://doi.org/10.1161/01.CIR.64.3.437 https://doi.org/10.1177/106002808401800312	Infants and children	Oral and Parenteral	4	May cause first-degree atrioventricular (AV) block or sinus bradycardia. If administered, monitor BP and heart rate, periodic liver function tests and ECG.
Anti-thymocyte (ATG)	Dyspnea 15% to 28%	Dyspnea 1% - 10 %	Dyspnea more than 25%	None recorded		Infants and children	Parenteral	4	It is also administered only intravenously and should be premedicated before the administration.
Fish oil (omega-3 polyunsaturated fatty acids)	Difficulty breathing (unknown frequency)	None recorded	-	None recorded		No data in children	Oral	2
Ethanol (Ethyl Alcohol or alcohol or Dehydrated Alcohol)	None recorded	None recorded	None recorded	None recorded		Children	Parenteral	2	Only available as parenteral formulation and requires administration under aseptic technique. Also, should take into consideration the dose of it and prevent overdosage reactions
Cladribine	Dyspnea (IV: 5%)	None recorded	Dysnpnea is common	Dyspnea: common, 5% - 7% Abnormal breath sounds: very common, 4% - 11%	Improved dyspnea; https://doi.org/10.1164/ajrccm.186.9.930 https://doi.org/10.1186/s13023-014-0191-8	Infants and children	Oral and Parenteral	3	The risk of increased events of malignancies were observed more frequently in patients taking tablet formulations only. Serious neurological toxicity (including irreversible paraparesis and quadriparesis) and acute nephrotoxicity had been reported in patients who received cladribine by continuous infusion at high doses (4 to 9 times the recommended dose for hairy cell leukemia). The parenteral is…
Sucralfate	None recorded	None recorded	None recorded	None recorded		Infants and children	Oral	2
Vitamin C (ascorbic acid)	None recorded	None recorded	None recorded	None recorded	doi.org/10.1164/rccm.2112074 in a selected group: 10.1164/arrd.1983.127.2.143	Infants and children	Oral and parenteral	1
Zinc (checked all bases)	None recorded	None recorded	None recorded	None recorded		Depends on the generic used but in general can be used in children.	Zinc chloride: Parenteral Zinc Gluconate and acetate: Oral	2
Urokinase	None recorded	NA	Immune allergic rxn including dyspnea: rare	None recorded	Supportive of use; doi:10.1001/archinte.1989.00390050157035	No data in children	Parenteral	1	Only available as IV formulation.
Heparin	None recorded	None recorded	Immune allergic rxn including dyspnea: rare	None recorded	Supportive of use: https://doi.org/10.1016/j.pupt.2017.10.001 doi: 10.3892/etm.2013.1001	Infants and children	Parenteral	1	Available as IV and SC formulations.
Pentosan (Pentosan polysulfate sodium)	Dyspnea <1%	None recorded	Dyspnea: uncommon	Dyspnea	Promising results for similar medications: https://doi.org/10.1016/j.pupt.2006.04.004	No data in children less than 16 years of age.	Oral	2
Aflibercept and Ziv-Aflibercept	If used as systemic: Dyspnea (12%)	If used as systemic: Dyspnea (12%)	If used as systemic: Dyspnea (12%)	None recorded	Causing dyspnea: Doi: 10.1200/JCO.2013.51.4109 10.1200/JCO.2009.22.9237 10.1158/1078-0432.CCR-13-2056	No data in children	Ophthalmic (Aflibercept) Parenteral (Ziv-Aflibercept)	5	Severe and sometimes fatal hemorrhage, including GI hemorrhage, has been reported in patients who have received ziv-aflibercept in combination with irinotecan, leucovorin, and 5-fluorouracil (FOLFIRI). GI perforation, including fatal GI perforation, can occur in patients receiving ziv-aflibercept. Only available as IV formulation that requires administration by a healtcare provider.
Rilonacept	None recorded	None recorded	None recorded	None recorded	No adverse events reported: https://doi.org/10.1111/all.12616 No effect on COPD: https://doi.org/10.1007/s40265-016-0625-9	Children ≥12 years of age	Parenteral	2	Only available as parenteral formulation.
Collagenase clostridium histolyticum (Collagenase)	None recorded	None recorded	Dyspnea: uncommon	None recorded		No data in children	Parenteral	2	Corporal rupture (penile fracture) was reported when the drug was injected intralesionally. Only available as parenteral formulation.
Copper	None recorded	None recorded	-	None recorded		Infants and children	Oral, parenteral, in IUDs or as a combination of minerals and vitamins. It is available as a solution for veterinary use.	2	Very limited data on it as a solo drug in the form of oral or IV formulations. Has a safe profile when it is used in combination with other minerals and vitamins.
Prothrombin (Prothrombin Complex)	Respiratory distress (2% to 4%) Postmarketing reports: bronchospasm and wheezes	Respiratory distress/dyspnea/hypoxia (1.9%) Post-marketing reports: dyspnea	Post-marketing reports: dyspnea Some post-marketing reports repoted it as a common adverse event	None recorded		Children ≥ 17 years of age.	Parenteral	5	Both fatal and nonfatal arterial and venous thromboembolic complications have been reported in clinical trials and postmarketing surveillance. It is only available as an IV formulation.
L-Glutamine	None recorded	None recorded	None recorded	None recorded	Did not report any dyspnea adverse events; doi: 10.1056/NEJMoa1715971.	Children ≥ 5 years of age	Oral	2
Turoctocog (or recombinant antihemophilic factor or Esperoct)	Dyspnea: postmarketing	Dyspnea (1.8%)	None recorded	None recorded		Safety has not been established in children below 12 years of age.	Parenteral	2	Only available as IV formulation.
Olopatadine	None recorded	None recorded	Dyspnea: unknown freq	Dyspnea		Ophthalmic: Children ≥ 2 years of age Intranasal: Children ≥ 6 years of age	Available as intranasal and ophthalmic formulations.	2	Available as intranasal and ophthalmic formulations.
Sunitinib	Dyspnea (26%)	Dyspnea (metastatic Renal Cell Carcinoma 28%, GIST 10%)	Dysnpnea is very common	Dyspnea: 2%	Lung toxicity in a patient treated with sunitinib; DOI: 10.1183/09031936.00048212 https://doi.org/10.1007/s10549-012-2285-0	Studies for children below 18 years of age have not been established.	Oral	5	Serious adverse events such as hepatotoxicity which may be severe, and in some cases, fatal. Haemorrhagic events and cardiovascular events of which some were fatal were also reported. Besides, dyspnea is a very common adverse event. It also has a drug-drug intxn with albuterol (bronchodilator).
Imatinib	Dyspnea (≤21%)	Dyspnea (0.5%)	Dyspnea is common (13-21 %)	Dyspnea: common (0.5% - 21%)	Not supporting: PMID: 22252615	Children	Oral	5	Hepatotoxicity may occur; fatal hepatic failure and severe hepatic injury requiring liver transplantation have been reported with both short- and long-term use. Also, severe congestive heart failure and left ventricular dysfunction have been reported.
Bexarotene	Dyspnea 1-10 %	None recorded	Dyspnea: unknown freq	Dyspnea: 10%	Associated with dyspnea: https://doi.org/10.1007/s12032-007-9035-x	It is not recommended in children (aged below 18 years)	Oral	5	Acute pancreatitis associated with elevations of fasting serum triglycerides has been reported in clinical studies (some being fatal). In addition to the reports of hepatotoxicity and hepatic injury.
Arsenic trioxide	Dyspnea (53%)	Dyspnea (53%)	Dyspnea is very common	Dyspnea: common	Acute lung injury induced by arsenic trioxide; https://doi.org/10.1016/j.jcrc.2004.08.009 doi: 10.1200/JCO.2010.32.2107.	children ≥4 years of age	Parenteral	5	Arsenic trioxide can cause QTc interval prolongation, complete atrioventricular block, and a torsade des pointes-type ventricular arrhythmia, which can be fatal. Serious encephalopathy, including Wernicke, has occurred in patients treated with arsenic trioxide. Only available for IV administration.
Acetylsalicylic acid (Aspirin)	Asthma, bronchospasm, dyspnea (without a frequency)	Bronchospasm	Hypersensitivity reactions of the skin, respiratory tract, gastrointestinal tract and cardiovascular system, especially in asthmatics. Symptoms could be: hypotension, attacks of dyspnoea, rhinitis, nasal congestion, anaphylactic shock or angioneurotic oedema.	Dyspnea	Aspirin exacerbating asthma attacks; https://doi.org/10.1002/art.10426 https://doi.org/10.1016/0091-6749(80)90143-8	Do not use aspirin in pediatric patients <18 years of age who have or who are recovering from chickenpox or flu symptoms (eg, viral illness) due to the association with Reye syndrome (APS 2016).	Oral	3	A contraindication to be used in patients with asthma. Aspirin may precipitate bronchospasm and induce asthma attacks or other hypersensitivity reactions in susceptible individuals.
Mesalazine (mesalamine or 5-aminosalicylic acid (5-ASA))	Dyspnea (<3%)	None recorded	Allergic and fibrotic lung reactions (including dyspnea)	5-ASA: very rare, postmarketing		Children ≥5 years of age	Oral	2	If it is to be used in asthmatic patients, it is better to avoid it as it is a form of salisylates and there are some concerns regarding cross-sensitivity between mesalazine and aspirin. Some studies reported that mesalamine therapy can be initiated safely in the majority of patients with aspirin hypersensitivity, but strongly recommended that a test dose be first given under supervision.
Rosiglitazone	Dyspnea <1%	None recorded	None recorded	None recorded	Increased dyspnea associated with heart failure; https://doi.org/10.1177/107424840400900i104 https://doi.org/10.1007/BF03401511	Children ≥10 years of age	Oral	5	This drug was discontinued in Europe, UK and NZ. It is still used under certain conditions and precautions in the US and Australia. It is reported to increased cause or exacerbate congestive heart failure (CHF) and stroke. Caes of hepatic toxicity and hepatitis were also reported. Caution should be warranted if used with close monitoring.
Fostamatinib	Dyspnea (2%, serious)	Chest pain, severe (1%)	Severe and significant adverse drug reactions included dyspnoea (2%)	None recorded	Associated with dyspnea; https://doi.org/10.2217/imt-2017-0097	Not to be used in patients of 18 years of age or less.	Oral	4	Hypertension (including hypertension crisis) and mild to moderate hepatotoxicity were reported. In addition, even though dyspnea was reported in a low frequency but it was reported as a severe and a significant adverse event.
Isoprenaline (isoproterenol)	Dyspnea: unknown frequency	Dyspnea: unknown frequency	Dyspnea: unknown frequency	Dyspnea		It is contraindicated in children less than 12 years of age.	Parenteral	2	Only available as IV formulation.
Etretinate	None recorded	-	-	None recorded		No data in children	Oral	5	It is discontinued and no longer prescribed in many countries because it is highly teratogenic (causes birth deformities) and stays in the body for an extremely long time.
Acitretin	None recorded	None recorded	None recorded	None recorded	It was associated with dyspnea though it not reported as an adverse event; https://doi.org/10.1016/j.jaad.2006.08.006	No data in children and it is not recommended as it affects growth.	Oral	5	Acitretin is the active metabolite of etretinate and both are highly teratogenic. Its used is an absolute contraindication in pregnancy and women intending to become pregnant. Caution is warranted if used in patients as it is associated with hepatotoxicity.
Minocycline	None recorded	None recorded	Dyspnea: rare	None recorded	Associated with lung changes; https://doi.org/10.1378/chest.115.5.1471 10.1183/09031936.95.08061018 doi:10.1001/archinte.1994.00420140105013	Depends on the formulation used but mostly can be used in children ≥8 years of age	Oral and parenteral	4	Serious liver injury, including irreversible drug induced hepatitis and fulminant hepatic failure (sometimes fatal) have been reported with use for acne treatment. In addition, dyspnea and lung changes were reported rarely. Parenteral therapy is only available as IV formulation.
Sorafenib	Dyspnea (≤14%)	None recorded	None recorded	Dyspnea: 1% - 14% Respiratory Distress: postmarketing, uncommon	Major clinical symptoms included dyspnea, cough, and fever; DOI 10.1007/s10147-012-0438-0 DOI 10.1007/s12328-012-0339-9	No data in children	Oral	4	The use of VEGF pathway inhibitors in patients with or without hypertension may promote the formation of aneurysms and/or artery dissections. It has been shown to prolong the QT/QTc interval.
Pazopanib	Dyspnea (20%)	None recorded	Dyspnea: common 4 %	Dyspnea: 1% - 20%	Associated with worsening dyspnoea; http://dx.doi.org/10.1136/bcr-2015-211522	No data in children	Oral	5	Severe and fatal hepatotoxicity has been observed in clinical trials. Interstitial lung disease (ILD)/pneumonitis has been reported with pazopanib; may be fatal. QTc prolongation, including torsade de pointes, has been observed. It has a drug-drug intxn with albuterol (bronchodilator).
Bosutinib	Dyspnea (12% to 20%)	Dyspnea (20%)	Dyspnea is very common and considered serious	Dyspnea	Patient had worsening of dyspnea; DOI: 10.1183/13993003.01004-2016 https://doi.org/10.3389/fphys.2017.00159	No data in children	Oral	4	Dyspnea is considered as as serious adverse event. Also, this drug has a drug-drug intxn with albuterol (bronchodilator).
Regorafenib	None recorded	None recorded	None recorded	None recorded	Developed interstitial pneumonitis; https://doi.org/10.1007/s13691-014-0200-8	No data in children	Oral	5	Severe and sometimes fatal hepatotoxicity has been reported in a couple of trials. Also, the use of VEGF pathway inhibitors in patients with or without hypertension was reported to promote the formation of aneurysms and/or artery dissections.
Ponatinib	Dyspnea (6% to 20%)	Dyspnea (7-21%)	Dyspnea (1.6%)	Dyspnea: 0% - 21%	Associated with dyspnea (dyspnea (7%–21%)); 10.4103/CRST.CRST_98_19 DOI: 10.1183/13993003.01110-2015	No data in children	Oral	5	It is associated with fatal myocardial infarction (MI), stroke, stenosis of large arterial vessels of the brain, severe peripheral vascular disease, and the need for urgent revascularization procedures. Patients with and without cardiovascular risk factors, including patients 50 years and younger, experienced these events. Hepatotoxicity, liver failure, and death have occurred in ponatinib-treate…
Nintedanib	None recorded	None recorded	None recorded	None recorded	This beneficial treatment effect of nintedanib on forced vital capacity was consistent across 3 clinical trials; PMID: 26629273 DOI: 10.1056/NEJMoa1402584	No data in children	Oral	4	There were conflicting data regarding the association of this drug with fatal hepatotoxicity. FDA had a black box warning of serious and nonserious cases of drug-induced liver injury (including severe liver injury with fatal outcome) have been reported. Others, only reported of having a dose-dependent liver toxicity in only 1% of patients. Thus, if nintedanib is to be used, careful monitoring and…
Midostaurin	Dyspnea (23%)	Dyspnea (23%)	Dyspnea: very common	None recorded	Associated with worsening respiratory status; doi: 10.14740/wjon1232 doi: 10.1634/theoncologist.2018-0222	No data in children	Oral	4	It is associated with pulmonary toxicity: Interstitial lung disease and pneumonitis have been reported with midostaurin (either as monotherapy or in combination with other chemotherapy), some cases have been fatal. If used, monitor for pulmonary symptoms; discontinue in patients who develop signs/symptoms of interstitial lung disease or pneumonitis (without an infectious etiology). In addition, t…
Brigatinib	Dyspnea (21% to 27%)	Dyspnea (27%)	Dyspnea considered as one of the most common and serious adverse reactions	None recorded	Associated with dyspnea; https://doi.org/10.1016/j.jtho.2019.04.028	No data in children	Oral	5	Pulmonary toxicity is reported characterized as severe, life-threatening, and fatal cases of pulmonary toxicity consistent with interstitial lung disease (ILD)/pneumonitis.

## Sheet: ST2e
Supplementary File 2e: Single drug-gene interactions in the ALK pathway gene-set
search_term	match_term	match_type	gene	drug	interaction_types	sources	pmids
NPPB	NPPB	Definite	NPPB	CARVEDILOL	other	DrugBank	15864245|15325927|11401111|11206715|14692707
NPPB	NPPB	Definite	NPPB	OXYMETHOLONE		DrugBank
NPPA	NPPA	Definite	NPPA	CHLORTHALIDONE		PharmGKB
GSK3B	GSK3B	Definite	GSK3B	LITHIUM CITRATE HYDRATE	inhibitor	ChemblInteractions
GSK3B	GSK3B	Definite	GSK3B	LITHIUM CARBONATE	inhibitor	ChemblInteractions
GSK3B	GSK3B	Definite	GSK3B	FLUOXETINE		PharmGKB
CTNNB1	CTNNB1	Definite	CTNNB1	IMATINIB		CKB	26861905
CTNNB1	CTNNB1	Definite	CTNNB1	EVEROLIMUS		CGI
CTNNB1	CTNNB1	Definite	CTNNB1	LETROZOLE		CGI
CTNNB1	CTNNB1	Definite	CTNNB1	TEMSIROLIMUS		CKB	27016228
CTNNB1	CTNNB1	Definite	CTNNB1	UREA		DrugBank	10592235|17139284|17016423
CTNNB1	CTNNB1	Definite	CTNNB1	TRAMETINIB		CKB	26343583
TGFB1	TGFB1	Definite	TGFB1	HYALURONIDASE (HUMAN RECOMBINANT)	Inhibitor	DrugBank	9435505|11327694|7648625|9850732
TGFB1	TGFB1	Definite	TGFB1	PIRFENIDONE		NCI	12907346
TGFB1	TGFB1	Definite	TGFB1	TRIAMCINOLONE		NCI	12174062
TGFB1	TGFB1	Definite	TGFB1	VITAMIN E		NCI	1505665|9608545
TGFB1	TGFB1	Definite	TGFB1	ATENOLOL		NCI	15049387
TGFB1	TGFB1	Definite	TGFB1	NICOTINE		NCI	10198208
TGFB1	TGFB1	Definite	TGFB1	HYDROCORTISONE		NCI	7895901
TGFB1	TGFB1	Definite	TGFB1	ETOPOSIDE		NCI	16002781
TGFB1	TGFB1	Definite	TGFB1	HYDROGEN PEROXIDE		NCI	9722602
TGFB1	TGFB1	Definite	TGFB1	GLATIRAMER ACETATE		PharmGKB
TGFB1	TGFB1	Definite	TGFB1	TOREMIFENE		NCI	12476040
TGFB1	TGFB1	Definite	TGFB1	ESTRADIOL		NCI	11498938
TGFB1	TGFB1	Definite	TGFB1	MELATONIN		NCI	9649124
TGFB1	TGFB1	Definite	TGFB1	ISOTRETINOIN		NCI	9815590
TGFB1	TGFB1	Definite	TGFB1	STREPTOZOTOCIN		NCI	17968528
TGFB1	TGFB1	Definite	TGFB1	CLADRIBINE		NCI	12097998
TGFB1	TGFB1	Definite	TGFB1	AMIFOSTINE		NCI	12005544
TGFB1	TGFB1	Definite	TGFB1	TESTOSTERONE		NCI	9288184
TGFB1	TGFB1	Definite	TGFB1	VERAPAMIL		NCI	16975733
TGFB1	TGFB1	Definite	TGFB1	RAMIPRIL		NCI	15716710
TGFB1	TGFB1	Definite	TGFB1	INTERFERON ALFA-2B		NCI	12567763
TGFB1	TGFB1	Definite	TGFB1	TAMOXIFEN		NCI	8019941
TGFB1	TGFB1	Definite	TGFB1	GALLIUM NITRATE		NCI	8381250
TGFB1	TGFB1	Definite	TGFB1	PIOGLITAZONE		NCI	17407709
TGFB1	TGFB1	Definite	TGFB1	TRETINOIN		NCI	8940178
TGFB1	TGFB1	Definite	TGFB1	IDOXURIDINE		NCI	1313063
TGFB1	TGFB1	Definite	TGFB1	DOXORUBICIN		NCI	12956904
ATF2	ATF2	Definite	ATF2	STREPTOZOTOCIN		NCI	12805110
ATF2	ATF2	Definite	ATF2	HYDROGEN PEROXIDE		NCI	9773928
TGFBR3	TGFBR3	Definite	TGFBR3	TRETINOIN		NCI	8143777
TGFBR3	TGFBR3	Definite	TGFBR3	DEXAMETHASONE		NCI	8143777
TGFBR2	TGFBR2	Definite	TGFBR2	GLYCERIN		DrugBank	17139284|17016423
TGFBR1	TGFBR1	Definite	TGFBR1	TRIHEXYPHENIDYL	inhibitor	GuideToPharmacologyInteractions
TGFBR1	TGFBR1	Definite	TGFBR1	NEOSTIGMINE BROMIDE	inhibitor	GuideToPharmacologyInteractions
RFC1	RFC1	Definite	RFC1	PRALATREXATE		ClearityFoundationClinicalTrial
APC	APC	Definite	APC	TRASTUZUMAB		CKB	27626067
APC	APC	Definite	APC	PYRVINIUM		CKB	20890287
APC	APC	Definite	APC	NICLOSAMIDE		CKB	21531761
APC	APC	Definite	APC	ERLOTINIB		CKB	17909047
APC	APC	Definite	APC	FLUOROURACIL		CKB	27626067
APC	APC	Definite	APC	IBUPROFEN		CKB	17909047
APC	APC	Definite	APC	LIOTHYRONINE SODIUM		NCI	12856637
APC	APC	Definite	APC	SIROLIMUS		CKB	18768809|20080688
APC	APC	Definite	APC	VINORELBINE BASE		CKB	22399804
APC	APC	Definite	APC	REGORAFENIB		CKB	27004155
APC	APC	Definite	APC	DECITABINE		NCI	17065059|12097272
APC	APC	Definite	APC	VANDETANIB		CKB	20811697
APC	APC	Definite	APC	DASATINIB		CKB	20473900
APC	APC	Definite	APC	SULINDAC		CKB	19755659
APC	APC	Definite	APC	LEUCOVORIN		CKB	27626067
SMAD4	SMAD4	Definite	SMAD4	PACLITAXEL		CKB	28514312
SMAD4	SMAD4	Definite	SMAD4	CETUXIMAB		CIViC	26046389
SMAD4	SMAD4	Definite	SMAD4	ALECTINIB		CKB	28476735
SMAD4	SMAD4	Definite	SMAD4	CRIZOTINIB		CKB	28476735
SMAD4	SMAD4	Definite	SMAD4	CARBOPLATIN		CKB	28514312
SMAD4	SMAD4	Definite	SMAD4	IMATINIB		CKB	28514312
SMAD4	SMAD4	Definite	SMAD4	FLUOROURACIL		CIViC	12237773
SMAD4	SMAD4	Definite	SMAD4	IRINOTECAN		CKB	22753594
SMAD4	SMAD4	Definite	SMAD4	GEMCITABINE		CKB	22753594

## Sheet: ST2f
Supplementary File 2f: Single drug-gene interactions in the Basal cell carcinoma gene-set
search_term	match_term	match_type	gene	drug	interaction_types	sources	pmids
FZD6	FZD6	Definite	FZD6	LIDOCAINE	agonist	GuideToPharmacologyInteractions
SMO	SMO	Definite	SMO	VISMODEGIB	inhibitor|antagonist	TALC|MyCancerGenome|CKB|GuideToPharmacologyInteractions|ChemblInteractions|CGI|CIViC|DrugBank|DoCM	26676867|25306392|19726788|25759020|26823493|22550175|23662017|25759019|22679179
SMO	SMO	Definite	SMO	FLUOCINONIDE	agonist	DrugBank	20439738
SMO	SMO	Definite	SMO	HALCINONIDE	agonist|activator	DrugBank	26658258
SMO	SMO	Definite	SMO	ERISMODEGIB	antagonist|inhibitor	TALC|MyCancerGenome|TdgClinicalTrial|CKB|GuideToPharmacologyInteractions|CIViC|DrugBank|MyCancerGenomeClinicalTrial	26546616|26323341|26823493|25759019|26124204
SMO	SMO	Definite	SMO	SONIDEGIB PHOSPHATE	inhibitor	ChemblInteractions
SMO	SMO	Definite	SMO	ARSENIC TRIOXIDE		CKB|CIViC	25759020|26823493|21183792
SMO	SMO	Definite	SMO	POSACONAZOLE		CKB	26823493
SMO	SMO	Definite	SMO	GEFITINIB		CKB|CIViC	26124204
TCF7L2	TCF7L2	Definite	TCF7L2	REPAGLINIDE		PharmGKB
SHH	SHH	Definite	SHH	CAFFEINE		NCI	15456933
SHH	SHH	Definite	SHH	TRETINOIN		NCI	10404648
GSK3B	GSK3B	Definite	GSK3B	LITHIUM CITRATE HYDRATE	inhibitor	ChemblInteractions
GSK3B	GSK3B	Definite	GSK3B	LITHIUM CARBONATE	inhibitor	ChemblInteractions
GSK3B	GSK3B	Definite	GSK3B	FLUOXETINE		PharmGKB
CTNNB1	CTNNB1	Definite	CTNNB1	IMATINIB		CKB	26861905
CTNNB1	CTNNB1	Definite	CTNNB1	EVEROLIMUS		CGI
CTNNB1	CTNNB1	Definite	CTNNB1	LETROZOLE		CGI
CTNNB1	CTNNB1	Definite	CTNNB1	TEMSIROLIMUS		CKB	27016228
CTNNB1	CTNNB1	Definite	CTNNB1	UREA		DrugBank	10592235|17139284|17016423
CTNNB1	CTNNB1	Definite	CTNNB1	TRAMETINIB		CKB	26343583
GLI1	GLI1	Definite	GLI1	TRETINOIN		NCI	11034076
SUFU	SUFU	Definite	SUFU	ERISMODEGIB		CIViC	24651015
APC	APC	Definite	APC	TRASTUZUMAB		CKB	27626067
APC	APC	Definite	APC	PYRVINIUM		CKB	20890287
APC	APC	Definite	APC	NICLOSAMIDE		CKB	21531761
APC	APC	Definite	APC	ERLOTINIB		CKB	17909047
APC	APC	Definite	APC	FLUOROURACIL		CKB	27626067
APC	APC	Definite	APC	IBUPROFEN		CKB	17909047
APC	APC	Definite	APC	LIOTHYRONINE SODIUM		NCI	12856637
APC	APC	Definite	APC	SIROLIMUS		CKB	18768809|20080688
APC	APC	Definite	APC	VINORELBINE BASE		CKB	22399804
APC	APC	Definite	APC	REGORAFENIB		CKB	27004155
APC	APC	Definite	APC	DECITABINE		NCI	17065059|12097272
APC	APC	Definite	APC	VANDETANIB		CKB	20811697
APC	APC	Definite	APC	DASATINIB		CKB	20473900
APC	APC	Definite	APC	SULINDAC		CKB	19755659
APC	APC	Definite	APC	LEUCOVORIN		CKB	27626067
PTCH1	PTCH1	Definite	PTCH1	VISMODEGIB	inhibitor	MyCancerGenome|OncoKB|CGI|CIViC	24900187|22670903|24651015|19726763|22670904|24523439|19726761
PTCH1	PTCH1	Definite	PTCH1	ERISMODEGIB		OncoKB|CIViC	24900187|22670903|24651015|22670904|24523439
PTCH1	PTCH1	Definite	PTCH1	TRETINOIN		NCI	12455633
TP53	TP53	Definite	TP53	ASPIRIN	acetylation	DrugBank	21475861
TP53	TP53	Definite	TP53	BORTEZOMIB	inhibitor	TALC
TP53	TP53	Definite	TP53	HALOPERIDOL		NCI	16476148
TP53	TP53	Definite	TP53	EPIRUBICIN		CKB	17388661|22903472
TP53	TP53	Definite	TP53	DABRAFENIB		CKB	27659046
TP53	TP53	Definite	TP53	BEVACIZUMAB		CKB|NCI	27466356|21399868|23670029|11720743|17145525|15579019
TP53	TP53	Definite	TP53	PROXYPHYLLINE		NCI	16751417
TP53	TP53	Definite	TP53	URSODIOL		NCI	15885361
TP53	TP53	Definite	TP53	DECITABINE		CGI
TP53	TP53	Definite	TP53	PRAMLINTIDE		CGI
TP53	TP53	Definite	TP53	IRINOTECAN		CKB	25567130
TP53	TP53	Definite	TP53	TRAMETINIB		CKB	27659046
TP53	TP53	Definite	TP53	DAUNORUBICIN		CKB	16243804
TP53	TP53	Definite	TP53	ERLOTINIB		CKB	27659046
TP53	TP53	Definite	TP53	THIOTEPA		NCI	12058967
TP53	TP53	Definite	TP53	CYCLOPHOSPHAMIDE		CKB	17388661|16243804|26438783
TP53	TP53	Definite	TP53	GEMCITABINE		CKB|CGI	27167172|23520471|21389100|27815358|26228206
TP53	TP53	Definite	TP53	RIZATRIPTAN		NCI	14614330
TP53	TP53	Definite	TP53	FLUOROURACIL		PharmGKB
TP53	TP53	Definite	TP53	METHYLPREDNISOLONE		NCI	16684279
TP53	TP53	Definite	TP53	ZINC CHLORIDE		NCI	16585387
TP53	TP53	Definite	TP53	DOXORUBICIN		CKB|CGI|CIViC	25658463|21399868|16243804|23165797|26826118|22698404|9569050
TP53	TP53	Definite	TP53	TRIFLUOPERAZINE		NCI	12415616
TP53	TP53	Definite	TP53	TOPOTECAN		CKB	26438783
TP53	TP53	Definite	TP53	ETOPOSIDE		CKB	25964101
TP53	TP53	Definite	TP53	METHIMAZOLE		NCI	7790147
TP53	TP53	Definite	TP53	CARBOPLATIN		CKB|CIViC	25567130|25658463|11595686|26494859|27998224
TP53	TP53	Definite	TP53	PROPYLTHIOURACIL		NCI	7790147
TP53	TP53	Definite	TP53	VEMURAFENIB		CKB	26343583|28514312
TP53	TP53	Definite	TP53	DOCETAXEL		CKB|CIViC	21399868|22425996
TP53	TP53	Definite	TP53	RITUXIMAB		NCI	11895917
TP53	TP53	Definite	TP53	DASATINIB		CKB	26855149
TP53	TP53	Definite	TP53	TRIFLURIDINE		CKB	25700705
TP53	TP53	Definite	TP53	PANITUMUMAB		CKB	28514312
TP53	TP53	Definite	TP53	IFOSFAMIDE		CKB	23165797
TP53	TP53	Definite	TP53	INTERFERON ALFA-2B		NCI	16001656
TP53	TP53	Definite	TP53	GRANISETRON		ClearityFoundationClinicalTrial
TP53	TP53	Definite	TP53	PEMBROLIZUMAB		CKB	28039262
TP53	TP53	Definite	TP53	CYTARABINE		CKB
TP53	TP53	Definite	TP53	SIROLIMUS		CKB|NCI	26144316|16651424
TP53	TP53	Definite	TP53	PACLITAXEL		PharmGKB|CKB|NCI	16459017
TP53	TP53	Definite	TP53	MYCOPHENOLIC ACID		NCI	16684279
TP53	TP53	Definite	TP53	IBRUTINIB		CKB	26563132
TP53	TP53	Definite	TP53	TEMOZOLOMIDE		CKB	21730979
TP53	TP53	Definite	TP53	MITOMYCIN		CGI
TP53	TP53	Definite	TP53	CETUXIMAB		CIViC	24957073
TP53	TP53	Definite	TP53	CAPECITABINE		CIViC	24957073
TP53	TP53	Definite	TP53	TAMOXIFEN		CIViC	10786679
TP53	TP53	Definite	TP53	CRIZOTINIB		CKB	25971938|27149990|26438783
TP53	TP53	Definite	TP53	VORINOSTAT		CKB	26009011|25669829
TP53	TP53	Definite	TP53	OLAPARIB		CKB	22172724
TP53	TP53	Definite	TP53	OXALIPLATIN		CKB|CIViC	24957073|21468686
TP53	TP53	Definite	TP53	PAZOPANIB		CKB	26646755|25669829
TP53	TP53	Definite	TP53	ENALAPRIL		NCI	16900775

## Sheet: ST2g
Supplementary File 2g: Single drug-gene interactions in the Dilated cardiomyopathy gene-set
search_term	match_term	match_type	gene	drug	interaction_types	sources	pmids
CACNA2D1	CACNA2D1	Definite	CACNA2D1	ISRADIPINE	inhibitor|blocker	TdgClinicalTrial|TEND|DrugBank|TTD	11752352|17139284|17016423
CACNA2D1	CACNA2D1	Definite	CACNA2D1	NISOLDIPINE	inhibitor	DrugBank	11752352
CACNA2D1	CACNA2D1	Definite	CACNA2D1	GABAPENTIN	inhibitor|modulator	TdgClinicalTrial|ChemblInteractions|TEND|DrugBank	16899342|17067834|17982508|20588320|18299583
CACNA2D1	CACNA2D1	Definite	CACNA2D1	FELODIPINE	inhibitor	TdgClinicalTrial|TEND|DrugBank	10525060|17475903|11752352
CACNA2D1	CACNA2D1	Definite	CACNA2D1	NITRENDIPINE	inhibitor|blocker	DrugBank|TTD	11752352
CACNA2D1	CACNA2D1	Definite	CACNA2D1	NIFEDIPINE	inhibitor|blocker	TdgClinicalTrial|TEND|DrugBank|TTD	16484345|11752352
CACNA2D1	CACNA2D1	Definite	CACNA2D1	CYCLANDELATE	inhibitor	DrugBank	10659603
CACNA2D1	CACNA2D1	Definite	CACNA2D1	DILTIAZEM	blocker	TTD
CACNA2D1	CACNA2D1	Definite	CACNA2D1	AMLODIPINE	blocker	TdgClinicalTrial|TTD
CACNA2D1	CACNA2D1	Definite	CACNA2D1	LERCANIDIPINE	blocker	TTD
CACNA2D1	CACNA2D1	Definite	CACNA2D1	BEPRIDIL HYDROCHLORIDE	blocker	ChemblInteractions
CACNA2D1	CACNA2D1	Definite	CACNA2D1	GABAPENTIN ENACARBIL	modulator	TdgClinicalTrial|ChemblInteractions|DrugBank
CACNA2D1	CACNA2D1	Definite	CACNA2D1	PREGABALIN	modulator	ChemblInteractions
CACNA2D1	CACNA2D1	Definite	CACNA2D1	MAGNESIUM SULFATE		DrugBank	17139284|17016423
CACNA2D1	CACNA2D1	Definite	CACNA2D1	SAFINAMIDE		TdgClinicalTrial
CACNA2D1	CACNA2D1	Definite	CACNA2D1	IBUTILIDE		TdgClinicalTrial|TEND
CACNB1	CACNB1	Definite	CACNB1	PREGABALIN	modulator	ChemblInteractions
CACNB1	CACNB1	Definite	CACNB1	NIMODIPINE	inhibitor	DrugBank	20661350|17705883|20335610|20334460|19844625
CACNB1	CACNB1	Definite	CACNB1	VERAPAMIL	inhibitor	TdgClinicalTrial|TEND|DrugBank	19125880
CACNB1	CACNB1	Definite	CACNB1	BEPRIDIL HYDROCHLORIDE	blocker	ChemblInteractions
CACNB1	CACNB1	Definite	CACNB1	GABAPENTIN	modulator	ChemblInteractions
CACNB1	CACNB1	Definite	CACNB1	GABAPENTIN ENACARBIL	modulator	ChemblInteractions
CACNB1	CACNB1	Definite	CACNB1	IBUTILIDE		TdgClinicalTrial|TEND
CACNB1	CACNB1	Definite	CACNB1	MAGNESIUM SULFATE		DrugBank	17139284|17016423
CACNB1	CACNB1	Definite	CACNB1	DRONEDARONE		DrugBank
CACNB2	CACNB2	Definite	CACNB2	ISRADIPINE	inhibitor	DrugBank	11752352
CACNB2	CACNB2	Definite	CACNB2	NIMODIPINE	inhibitor	DrugBank	20661350|17705883|20334460|11752352|19844625
CACNB2	CACNB2	Definite	CACNB2	NISOLDIPINE	inhibitor	DrugBank	11752352
CACNB2	CACNB2	Definite	CACNB2	VERAPAMIL	inhibitor	TdgClinicalTrial|TEND|DrugBank	19125880
CACNB2	CACNB2	Definite	CACNB2	FELODIPINE	inhibitor	TdgClinicalTrial|DrugBank	10525060|17475903|11752352
CACNB2	CACNB2	Definite	CACNB2	NITRENDIPINE	inhibitor	DrugBank	11752352
CACNB2	CACNB2	Definite	CACNB2	NIFEDIPINE	inhibitor	DrugBank	11752352
CACNB2	CACNB2	Definite	CACNB2	SALSALATE	inhibitor	GuideToPharmacologyInteractions
CACNB2	CACNB2	Definite	CACNB2	BEPRIDIL HYDROCHLORIDE	blocker	ChemblInteractions
CACNB2	CACNB2	Definite	CACNB2	PREGABALIN	modulator	ChemblInteractions
CACNB2	CACNB2	Definite	CACNB2	GABAPENTIN	modulator	ChemblInteractions
CACNB2	CACNB2	Definite	CACNB2	GABAPENTIN ENACARBIL	modulator	ChemblInteractions
CACNB2	CACNB2	Definite	CACNB2	MAGNESIUM SULFATE		DrugBank	17139284|17016423
CACNB2	CACNB2	Definite	CACNB2	AMLODIPINE		TdgClinicalTrial
CACNB2	CACNB2	Definite	CACNB2	DRONEDARONE		DrugBank
CACNB3	CACNB3	Definite	CACNB3	GABAPENTIN ENACARBIL	modulator	ChemblInteractions
CACNB3	CACNB3	Definite	CACNB3	NIMODIPINE	inhibitor	DrugBank	20661350|17705883|20335610|20334460|19844625
CACNB3	CACNB3	Definite	CACNB3	VERAPAMIL	inhibitor	TdgClinicalTrial|TEND|DrugBank	19125880
CACNB3	CACNB3	Definite	CACNB3	BEPRIDIL HYDROCHLORIDE	blocker	ChemblInteractions
CACNB3	CACNB3	Definite	CACNB3	PREGABALIN	modulator	ChemblInteractions
CACNB3	CACNB3	Definite	CACNB3	GABAPENTIN	modulator	ChemblInteractions
CACNB3	CACNB3	Definite	CACNB3	DRONEDARONE		DrugBank
CACNB3	CACNB3	Definite	CACNB3	SAFINAMIDE		TdgClinicalTrial
CACNB4	CACNB4	Definite	CACNB4	NIMODIPINE	inhibitor	DrugBank	20661350|17705883|20335610|20334460|19844625
CACNB4	CACNB4	Definite	CACNB4	VERAPAMIL	inhibitor	TdgClinicalTrial|TEND|DrugBank	19125880
CACNB4	CACNB4	Definite	CACNB4	BEPRIDIL HYDROCHLORIDE	blocker	ChemblInteractions
CACNB4	CACNB4	Definite	CACNB4	PREGABALIN	modulator	ChemblInteractions
CACNB4	CACNB4	Definite	CACNB4	GABAPENTIN ENACARBIL	modulator	ChemblInteractions
CACNB4	CACNB4	Definite	CACNB4	GABAPENTIN	modulator	ChemblInteractions
CACNB4	CACNB4	Definite	CACNB4	DRONEDARONE		DrugBank
CACNB4	CACNB4	Definite	CACNB4	SAFINAMIDE		TdgClinicalTrial
CACNG1	CACNG1	Definite	CACNG1	LERCANIDIPINE	inhibitor	TdgClinicalTrial|TEND|DrugBank	19619074|17139284|17016423
CACNG1	CACNG1	Definite	CACNG1	NITRENDIPINE	inhibitor	TdgClinicalTrial|TEND|DrugBank	17139284|17016423
CACNG1	CACNG1	Definite	CACNG1	FLUSPIRILENE	inhibitor	DrugBank	1696149|11842444
CACNG1	CACNG1	Definite	CACNG1	BEPRIDIL HYDROCHLORIDE	blocker	ChemblInteractions
CACNG1	CACNG1	Definite	CACNG1	PREGABALIN	modulator	ChemblInteractions
CACNG1	CACNG1	Definite	CACNG1	GABAPENTIN	modulator	ChemblInteractions
CACNG1	CACNG1	Definite	CACNG1	GABAPENTIN ENACARBIL	modulator	ChemblInteractions
CACNG1	CACNG1	Definite	CACNG1	SPIRONOLACTONE		DrugBank	10942165|872489
CACNG1	CACNG1	Definite	CACNG1	CLEVIDIPINE		TEND
CACNG1	CACNG1	Definite	CACNG1	NIMODIPINE		TdgClinicalTrial|TEND
CACNG1	CACNG1	Definite	CACNG1	AMLODIPINE		TEND
CACNG1	CACNG1	Definite	CACNG1	MAGNESIUM SULFATE		DrugBank	17139284|17016423
CACNG1	CACNG1	Definite	CACNG1	DILTIAZEM		TdgClinicalTrial|TEND
CACNG1	CACNG1	Definite	CACNG1	VERAPAMIL		TEND
TNF	TNF	Definite	TNF	ETANERCEPT	antibody|inhibitor	PharmGKB|TdgClinicalTrial|ChemblInteractions|TEND|DrugBank|TTD	10375846|10405518|10206649|11752352|10338381|10357816
TNF	TNF	Definite	TNF	ADALIMUMAB	antibody|inhibitor	PharmGKB|TdgClinicalTrial|ChemblInteractions|TEND|DrugBank|TTD	12044041|15022409|14532145|15046527|11752352|15200343
TNF	TNF	Definite	TNF	INFLIXIMAB	inhibitor|antibody	PharmGKB|TdgClinicalTrial|ChemblInteractions|TEND|DrugBank|TTD	16456024|16052578|12110154|15481318|15691299|15674127|15804598|11752352|15691217|17642244|16622728
TNF	TNF	Definite	TNF	THALIDOMIDE	inhibitor	TdgClinicalTrial|TEND|DrugBank|TTD	8755512|12046682|12167383|12105857|12102294|11752352|12113124
TNF	TNF	Definite	TNF	INAMRINONE	inhibitor	DrugBank	11805217|1611705|10075051|11969359|10444479
TNF	TNF	Definite	TNF	GOLIMUMAB	antibody|inhibitor	TdgClinicalTrial|ChemblInteractions|TEND|DrugBank|TTD	21079302
TNF	TNF	Definite	TNF	CERTOLIZUMAB PEGOL	neutralizer|antibody|inhibitor	TdgClinicalTrial|ChemblInteractions|TEND|DrugBank|TTD	23620660
TNF	TNF	Definite	TNF	POMALIDOMIDE	inhibitor	DrugBank	22917017
TNF	TNF	Definite	TNF	PIRFENIDONE	inhibitor	TTD
TNF	TNF	Definite	TNF	PENTOXIFYLLINE	antibody	TTD
TNF	TNF	Definite	TNF	LENALIDOMIDE	inhibitor	ClearityFoundationClinicalTrial|TTD
TNF	TNF	Definite	TNF	CHLOROQUINE		DrugBank	16670522|16418198|16870179|16761500|17456179
TNF	TNF	Definite	TNF	RISPERIDONE		NCI	15567770|11545247
TNF	TNF	Definite	TNF	APREMILAST		DrugBank
TNF	TNF	Definite	TNF	LACTULOSE HYDRATE		NCI	11226652
TNF	TNF	Definite	TNF	HYDROXYCHLOROQUINE		NCI	9002011
TNF	TNF	Definite	TNF	MAGNESIUM SULFATE		NCI	16384608
TNF	TNF	Definite	TNF	ABACAVIR		PharmGKB
TNF	TNF	Definite	TNF	RABEPRAZOLE		NCI	16815316
TNF	TNF	Definite	TNF	OMEPRAZOLE		NCI	16815316
TNF	TNF	Definite	TNF	GLUCOSAMINE		DrugBank	16445576|12244074|16469053|16431966|15930455
TNF	TNF	Definite	TNF	BUPIVACAINE		NCI	15781526
TNF	TNF	Definite	TNF	MILTEFOSINE		NCI	7883777
TNF	TNF	Definite	TNF	PRAZOSIN HYDROCHLORIDE		NCI	11406472
TNF	TNF	Definite	TNF	CARBAMAZEPINE		PharmGKB|NCI	15565432
TNF	TNF	Definite	TNF	MIDAZOLAM		NCI	16406030
TNF	TNF	Definite	TNF	PROCARBAZINE		NCI	12230110
TNF	TNF	Definite	TNF	PROPYLTHIOURACIL		NCI	15119959
TNF	TNF	Definite	TNF	TIMOLOL MALEATE		NCI	12219997
TNF	TNF	Definite	TNF	MEROPENEM		NCI	8354907
TNF	TNF	Definite	TNF	PYRIDOXINE		NCI	16277693
TNF	TNF	Definite	TNF	PENICILLIN G SODIUM		NCI	1375873
TNF	TNF	Definite	TNF	DIDANOSINE		NCI	9430255
TNF	TNF	Definite	TNF	CEFOTAXIME		NCI	8354907|10989981
TNF	TNF	Definite	TNF	FOLIC ACID		NCI	14608078
TNF	TNF	Definite	TNF	SPIRONOLACTONE		NCI	16837769
TNF	TNF	Definite	TNF	GENTAMICIN		NCI	14565862
TNF	TNF	Definite	TNF	GLIMEPIRIDE		NCI	14686960
TNF	TNF	Definite	TNF	METHIMAZOLE		NCI	8491516
TNF	TNF	Definite	TNF	NORDIHYDROGUAIARETIC ACID		NCI	15379894
TNF	TNF	Definite	TNF	CROMOLYN SODIUM		NCI	7554404
TNF	TNF	Definite	TNF	FLUOCINOLONE ACETONIDE		NCI	16454812
TNF	TNF	Definite	TNF	CLENBUTEROL		DrugBank	17139543|11193379|15021963|10071758|16261833
RYR2	RYR2	Definite	RYR2	CAFFEINE	activator	GuideToPharmacologyInteractions
RYR2	RYR2	Definite	RYR2	PROCAINE	channel blocker	GuideToPharmacologyInteractions
CACNG6	CACNG6	Definite	CACNG6	BEPRIDIL HYDROCHLORIDE	blocker	ChemblInteractions
CACNG6	CACNG6	Definite	CACNG6	PREGABALIN	modulator	ChemblInteractions
CACNG6	CACNG6	Definite	CACNG6	GABAPENTIN ENACARBIL	modulator	ChemblInteractions
CACNG6	CACNG6	Definite	CACNG6	GABAPENTIN	modulator	ChemblInteractions
CACNG7	CACNG7	Definite	CACNG7	BEPRIDIL HYDROCHLORIDE	blocker	ChemblInteractions
CACNG7	CACNG7	Definite	CACNG7	PREGABALIN	modulator	ChemblInteractions
CACNG7	CACNG7	Definite	CACNG7	GABAPENTIN	modulator	ChemblInteractions
CACNG7	CACNG7	Definite	CACNG7	GABAPENTIN ENACARBIL	modulator	ChemblInteractions
ATP2A2	ATP2A2	Definite	ATP2A2	ENOXACIN	inhibitor	GuideToPharmacologyInteractions
ADRB1	ADRB1	Definite	ADRB1	NOREPINEPHRINE	agonist	PharmGKB|DrugBank	9464897|18064417|11752352|19110970
ADRB1	ADRB1	Definite	ADRB1	AMPHETAMINE	agonist	DrugBank	6245760|4399738
ADRB1	ADRB1	Definite	ADRB1	BETHANIDINE	antagonist	DrugBank	6114720|6812406|11752352
ADRB1	ADRB1	Definite	ADRB1	ISOETHARINE	agonist	TdgClinicalTrial|TEND|DrugBank	17157779|15917856|17628611|16973691|17329986
ADRB1	ADRB1	Definite	ADRB1	CABERGOLINE	binder	DrugBank	12388666
ADRB1	ADRB1	Definite	ADRB1	ATENOLOL	antagonist	TdgClinicalTrial|ChemblInteractions|TEND|DrugBank|TTD	9300315|17628611|11752352|12065078|10913016
ADRB1	ADRB1	Definite	ADRB1	MIRTAZAPINE	binder	DrugBank	10762339
ADRB1	ADRB1	Definite	ADRB1	LOXAPINE	binder	DrugBank
ADRB1	ADRB1	Definite	ADRB1	PROPRANOLOL	antagonist	TdgClinicalTrial|TEND|DrugBank	15236843|14757703|17628611|17572694|11752352|16177222
ADRB1	ADRB1	Definite	ADRB1	PINDOLOL	partial agonist	TdgClinicalTrial|ChemblInteractions|TEND|DrugBank	14608456|2907348|2148726|8884690|11752352|1687398
ADRB1	ADRB1	Definite	ADRB1	ARBUTAMINE	agonist	TdgClinicalTrial|TEND|DrugBank	8723169|17139284|17016423
ADRB1	ADRB1	Definite	ADRB1	CARVEDILOL	antagonist	TdgClinicalTrial|ChemblInteractions|TEND|DrugBank	2575762|1712335|7908256|2577144
ADRB1	ADRB1	Definite	ADRB1	NADOLOL	antagonist	TdgClinicalTrial|ChemblInteractions|TEND|DrugBank	10606440|1354084|7912539|7981009|10433496|11752352
ADRB1	ADRB1	Definite	ADRB1	LEVOBUNOLOL	antagonist	TdgClinicalTrial|TEND|DrugBank	11572462|10864881|1351412|2891463|7928182|2892662
ADRB1	ADRB1	Definite	ADRB1	PIRBUTEROL	agonist	DrugBank	2901958|6143816
ADRB1	ADRB1	Definite	ADRB1	PRACTOLOL	antagonist	TdgClinicalTrial|TEND|DrugBank|TTD	2871880|6524278|30388|2857116|11752352
ADRB1	ADRB1	Definite	ADRB1	PENBUTOLOL	partial agonist|antagonist	TdgClinicalTrial|TEND|DrugBank	11738481|6755764|11224195|2189902
ADRB1	ADRB1	Definite	ADRB1	MEPHENTERMINE	agonist	DrugBank	21182601
ADRB1	ADRB1	Definite	ADRB1	CLENBUTEROL	agonist	DrugBank	20590599
ADRB1	ADRB1	Definite	ADRB1	OXPRENOLOL	antagonist	TdgClinicalTrial|TEND|DrugBank|TTD	6202960|6124492|2871880|11752352|17139284|17016423
ADRB1	ADRB1	Definite	ADRB1	CELIPROLOL	antagonist	DrugBank	18636069|17384462|17141277
ADRB1	ADRB1	Definite	ADRB1	NEBIVOLOL	antagonist	TdgClinicalTrial|TEND|DrugBank|TTD	11752352|17661735|16961165
ADRB1	ADRB1	Definite	ADRB1	DROXIDOPA	agonist	ChemblInteractions|DrugBank	9464897|18064417|19110970
ADRB1	ADRB1	Definite	ADRB1	VORTIOXETINE	ligand	DrugBank	21486038
ADRB1	ADRB1	Definite	ADRB1	BETAXOLOL	antagonist	TdgClinicalTrial|TEND|TTD
ADRB1	ADRB1	Definite	ADRB1	BISOPROLOL	antagonist	TdgClinicalTrial|TEND|TTD
ADRB1	ADRB1	Definite	ADRB1	DOBUTAMINE	agonist	TdgClinicalTrial|TEND|TTD
ADRB1	ADRB1	Definite	ADRB1	LEVOBETAXOLOL	antagonist	TTD
ADRB1	ADRB1	Definite	ADRB1	SOTALOL	antagonist	TTD
ADRB1	ADRB1	Definite	ADRB1	ACEBUTOLOL	antagonist	TdgClinicalTrial|TEND|TTD
ADRB1	ADRB1	Definite	ADRB1	DOBUTAMINE HYDROCHLORIDE	agonist	ChemblInteractions
ADRB1	ADRB1	Definite	ADRB1	DIPIVEFRIN HYDROCHLORIDE	agonist	ChemblInteractions
ADRB1	ADRB1	Definite	ADRB1	EPINEPHRINE	agonist	TdgClinicalTrial|ChemblInteractions|TEND
ADRB1	ADRB1	Definite	ADRB1	MEPHENTERMINE SULFATE	agonist	ChemblInteractions
ADRB1	ADRB1	Definite	ADRB1	NORADRENALINE	agonist	ChemblInteractions
ADRB1	ADRB1	Definite	ADRB1	LEVOBETAXOLOL HYDROCHLORIDE	antagonist	ChemblInteractions
ADRB1	ADRB1	Definite	ADRB1	OXPRENOLOL HYDROCHLORIDE	antagonist	ChemblInteractions
ADRB1	ADRB1	Definite	ADRB1	BISOPROLOL FUMARATE	antagonist	ChemblInteractions
ADRB1	ADRB1	Definite	ADRB1	DOPAMINE HYDROCHLORIDE	agonist	ChemblInteractions
ADRB1	ADRB1	Definite	ADRB1	PENBUTOLOL SULFATE	antagonist	ChemblInteractions
ADRB1	ADRB1	Definite	ADRB1	SOTALOL HYDROCHLORIDE	antagonist	ChemblInteractions
ADRB1	ADRB1	Definite	ADRB1	BETAXOLOL HYDROCHLORIDE	antagonist	ChemblInteractions
ADRB1	ADRB1	Definite	ADRB1	TIMOLOL MALEATE	antagonist	ChemblInteractions
ADRB1	ADRB1	Definite	ADRB1	METOPROLOL SUCCINATE	antagonist	ChemblInteractions
ADRB1	ADRB1	Definite	ADRB1	METOPROLOL TARTRATE	antagonist	ChemblInteractions
ADRB1	ADRB1	Definite	ADRB1	NEBIVOLOL HYDROCHLORIDE	antagonist	ChemblInteractions
ADRB1	ADRB1	Definite	ADRB1	LABETALOL HYDROCHLORIDE	antagonist	ChemblInteractions
ADRB1	ADRB1	Definite	ADRB1	LEVOBUNOLOL HYDROCHLORIDE	antagonist	ChemblInteractions
ADRB1	ADRB1	Definite	ADRB1	EPINEPHRINE BITARTRATE	agonist	ChemblInteractions
ADRB1	ADRB1	Definite	ADRB1	HYDROXYAMPHETAMINE HYDROBROMIDE	agonist	ChemblInteractions
ADRB1	ADRB1	Definite	ADRB1	PROPRANOLOL HYDROCHLORIDE	antagonist	ChemblInteractions
ADRB1	ADRB1	Definite	ADRB1	CARVEDILOL PHOSPHATE	antagonist	ChemblInteractions
ADRB1	ADRB1	Definite	ADRB1	ISOPROTERENOL SULFATE	agonist	ChemblInteractions
ADRB1	ADRB1	Definite	ADRB1	CARTEOLOL HYDROCHLORIDE	antagonist	ChemblInteractions
ADRB1	ADRB1	Definite	ADRB1	ISOPROTERENOL HYDROCHLORIDE	agonist	ChemblInteractions
ADRB1	ADRB1	Definite	ADRB1	METOPROLOL FUMARATE	antagonist	ChemblInteractions
ADRB1	ADRB1	Definite	ADRB1	ACEBUTOLOL HYDROCHLORIDE	antagonist	ChemblInteractions
ADRB1	ADRB1	Definite	ADRB1	PROPAFENONE HYDROCHLORIDE	antagonist	ChemblInteractions
ADRB1	ADRB1	Definite	ADRB1	TIMOLOL	antagonist	TdgClinicalTrial|ChemblInteractions|TEND
ADRB1	ADRB1	Definite	ADRB1	OLANZAPINE		DrugBank	8822531
ADRB1	ADRB1	Definite	ADRB1	METOPROLOL		TdgClinicalTrial|TEND
ADRB1	ADRB1	Definite	ADRB1	LABETALOL		TdgClinicalTrial|TEND
ADRB1	ADRB1	Definite	ADRB1	ZIPRASIDONE		TEND
ADRB1	ADRB1	Definite	ADRB1	DRONEDARONE		TdgClinicalTrial|TEND|DrugBank	17389667
ADRB1	ADRB1	Definite	ADRB1	DESIPRAMINE		TdgClinicalTrial|TEND
ADRB1	ADRB1	Definite	ADRB1	ISOPROTERENOL		PharmGKB|TdgClinicalTrial|TEND
ADRB1	ADRB1	Definite	ADRB1	AMIODARONE		TdgClinicalTrial|TEND
ADRB1	ADRB1	Definite	ADRB1	CARTEOLOL		TdgClinicalTrial|TEND
ADRB1	ADRB1	Definite	ADRB1	DOPAMINE		PharmGKB
ITGA4	ITGA4	Definite	ITGA4	VEDOLIZUMAB	inhibitor|antibody	TdgClinicalTrial|ChemblInteractions|DrugBank	19509315
ITGA4	ITGA4	Definite	ITGA4	NATALIZUMAB	antibody|inhibitor	TdgClinicalTrial|ChemblInteractions|TEND|DrugBank|TTD	16634035|16268663|11752352|17461891|9389694
ITGA4	ITGA4	Definite	ITGA4	TINZAPARIN SODIUM	inhibitor	DrugBank	19888514
ITGA2B	ITGA2B	Definite	ITGA2B	ABCIXIMAB	antagonist|inhibitor	PharmGKB|TdgClinicalTrial|ChemblInteractions|TEND|DrugBank	18510478|12749745|19499855
ITGA2B	ITGA2B	Definite	ITGA2B	TIROFIBAN	antagonist	PharmGKB|TdgClinicalTrial|TEND|DrugBank	11929319|11565896|12057986|20210689|11342206|11076818
ITGA2B	ITGA2B	Definite	ITGA2B	EPTIFIBATIDE	inhibitor	PharmGKB|TdgClinicalTrial|ChemblInteractions
ITGA2B	ITGA2B	Definite	ITGA2B	TIROFIBAN HYDROCHLORIDE	inhibitor	ChemblInteractions
ITGA2B	ITGA2B	Definite	ITGA2B	THROMBIN		NCI	14652636|7689831
ITGA2B	ITGA2B	Definite	ITGA2B	ASPIRIN		NCI	11583738|11096182
ITGA5	ITGA5	Definite	ITGA5	DIMETHYL SULFOXIDE		NCI	9678720
DMD	DMD	Definite	DMD	ETEPLIRSEN		FDA
CACNA2D3	CACNA2D3	Definite	CACNA2D3	PREGABALIN	modulator	ChemblInteractions
CACNA2D3	CACNA2D3	Definite	CACNA2D3	BEPRIDIL HYDROCHLORIDE	blocker	ChemblInteractions
CACNA2D3	CACNA2D3	Definite	CACNA2D3	GABAPENTIN ENACARBIL	modulator	ChemblInteractions
CACNA2D3	CACNA2D3	Definite	CACNA2D3	GABAPENTIN	modulator	ChemblInteractions
CACNA1D	CACNA1D	Definite	CACNA1D	ISRADIPINE	inhibitor|gating inhibitor|blocker	GuideToPharmacologyInteractions|ChemblInteractions|DrugBank	11285265|19029287
CACNA1D	CACNA1D	Definite	CACNA1D	NIMODIPINE	inhibitor|blocker	ChemblInteractions|DrugBank	20661350|17705883|19029287|20335610|20334460|19844625
CACNA1D	CACNA1D	Definite	CACNA1D	NISOLDIPINE	inhibitor|blocker	ChemblInteractions|DrugBank	19029287
CACNA1D	CACNA1D	Definite	CACNA1D	CINNARIZINE	inhibitor	DrugBank	1281221|3530295
CACNA1D	CACNA1D	Definite	CACNA1D	VERAPAMIL	inhibitor|channel blocker	TdgClinicalTrial|GuideToPharmacologyInteractions|TEND|DrugBank	19125880
CACNA1D	CACNA1D	Definite	CACNA1D	FELODIPINE	inhibitor|blocker	TdgClinicalTrial|ChemblInteractions|DrugBank	19029287
CACNA1D	CACNA1D	Definite	CACNA1D	NITRENDIPINE	inhibitor|gating inhibitor	GuideToPharmacologyInteractions|DrugBank	19029287
CACNA1D	CACNA1D	Definite	CACNA1D	NIFEDIPINE	inhibitor|gating inhibitor|blocker	GuideToPharmacologyInteractions|ChemblInteractions|DrugBank	19029287|11160515
CACNA1D	CACNA1D	Definite	CACNA1D	AMLODIPINE	gating inhibitor	TdgClinicalTrial|GuideToPharmacologyInteractions
CACNA1D	CACNA1D	Definite	CACNA1D	BEPRIDIL HYDROCHLORIDE	blocker	ChemblInteractions
CACNA1D	CACNA1D	Definite	CACNA1D	PREGABALIN	modulator	ChemblInteractions
CACNA1D	CACNA1D	Definite	CACNA1D	GABAPENTIN	modulator	ChemblInteractions
CACNA1D	CACNA1D	Definite	CACNA1D	GABAPENTIN ENACARBIL	modulator	ChemblInteractions
CACNA1D	CACNA1D	Definite	CACNA1D	CLEVIDIPINE	blocker	TdgClinicalTrial|ChemblInteractions|DrugBank	15492770
CACNA1D	CACNA1D	Definite	CACNA1D	DRONEDARONE HYDROCHLORIDE	blocker	ChemblInteractions
CACNA1D	CACNA1D	Definite	CACNA1D	AMLODIPINE MALEATE	blocker	ChemblInteractions
CACNA1D	CACNA1D	Definite	CACNA1D	VERAPAMIL HYDROCHLORIDE	blocker	ChemblInteractions
CACNA1D	CACNA1D	Definite	CACNA1D	DILTIAZEM HYDROCHLORIDE	blocker	ChemblInteractions
CACNA1D	CACNA1D	Definite	CACNA1D	DILTIAZEM MALATE	blocker	ChemblInteractions
CACNA1D	CACNA1D	Definite	CACNA1D	AMLODIPINE BESYLATE	blocker	ChemblInteractions
CACNA1D	CACNA1D	Definite	CACNA1D	NICARDIPINE HYDROCHLORIDE	blocker	ChemblInteractions
CACNA1D	CACNA1D	Definite	CACNA1D	DRONEDARONE		DrugBank
CACNA1C	CACNA1C	Definite	CACNA1C	ISRADIPINE	inhibitor|blocker	TdgClinicalTrial|ChemblInteractions|TEND|DrugBank	12135765|10766758|9607315
CACNA1C	CACNA1C	Definite	CACNA1C	NIMODIPINE	inhibitor|blocker	ChemblInteractions|DrugBank	20661350|17705883|20335610|20334460|11752352|19844625|8731425
CACNA1C	CACNA1C	Definite	CACNA1C	NISOLDIPINE	inhibitor|gating inhibitor|blocker	GuideToPharmacologyInteractions|ChemblInteractions|DrugBank	7592963|9584217|9846638|11752352
CACNA1C	CACNA1C	Definite	CACNA1C	CINNARIZINE	inhibitor	DrugBank	1281221|3530295
CACNA1C	CACNA1C	Definite	CACNA1C	VERAPAMIL	inhibitor|channel blocker	TdgClinicalTrial|GuideToPharmacologyInteractions|TEND|DrugBank	15880143|19125880|9846638|15286207
CACNA1C	CACNA1C	Definite	CACNA1C	FELODIPINE	inhibitor|blocker	TdgClinicalTrial|ChemblInteractions|DrugBank	10525060|17475903|11752352
CACNA1C	CACNA1C	Definite	CACNA1C	NITRENDIPINE	inhibitor	DrugBank	11752352
CACNA1C	CACNA1C	Definite	CACNA1C	NIFEDIPINE	inhibitor|blocker	ChemblInteractions|DrugBank	9846638|11752352
CACNA1C	CACNA1C	Definite	CACNA1C	DILTIAZEM	channel blocker	GuideToPharmacologyInteractions
CACNA1C	CACNA1C	Definite	CACNA1C	BEPRIDIL HYDROCHLORIDE	blocker	ChemblInteractions
CACNA1C	CACNA1C	Definite	CACNA1C	GABAPENTIN	modulator	ChemblInteractions
CACNA1C	CACNA1C	Definite	CACNA1C	GABAPENTIN ENACARBIL	modulator	ChemblInteractions
CACNA1C	CACNA1C	Definite	CACNA1C	CLEVIDIPINE	blocker	TdgClinicalTrial|ChemblInteractions|DrugBank	15492770
CACNA1C	CACNA1C	Definite	CACNA1C	DRONEDARONE HYDROCHLORIDE	blocker	ChemblInteractions
CACNA1C	CACNA1C	Definite	CACNA1C	AMLODIPINE MALEATE	blocker	ChemblInteractions
CACNA1C	CACNA1C	Definite	CACNA1C	PREGABALIN	modulator	ChemblInteractions
CACNA1C	CACNA1C	Definite	CACNA1C	VERAPAMIL HYDROCHLORIDE	blocker	ChemblInteractions
CACNA1C	CACNA1C	Definite	CACNA1C	DILTIAZEM MALATE	blocker	ChemblInteractions
CACNA1C	CACNA1C	Definite	CACNA1C	AMLODIPINE BESYLATE	blocker	ChemblInteractions
CACNA1C	CACNA1C	Definite	CACNA1C	NICARDIPINE HYDROCHLORIDE	blocker	ChemblInteractions
CACNA1C	CACNA1C	Definite	CACNA1C	DILTIAZEM HYDROCHLORIDE	blocker	ChemblInteractions
CACNA1C	CACNA1C	Definite	CACNA1C	IBUTILIDE		TdgClinicalTrial|TEND
CACNA1C	CACNA1C	Definite	CACNA1C	NICARDIPINE		TdgClinicalTrial|TEND
CACNA1C	CACNA1C	Definite	CACNA1C	DRONEDARONE		DrugBank
CACNA1C	CACNA1C	Definite	CACNA1C	MAGNESIUM SULFATE		DrugBank	17139284|17016423
CACNA1C	CACNA1C	Definite	CACNA1C	AMLODIPINE		TdgClinicalTrial
CACNA1F	CACNA1F	Definite	CACNA1F	NIMODIPINE	blocker|inhibitor|gating inhibitor	GuideToPharmacologyInteractions|ChemblInteractions|DrugBank	20661350|20335610|20334460|19844625
CACNA1F	CACNA1F	Definite	CACNA1F	CINNARIZINE	inhibitor	DrugBank	1281221|3530295
CACNA1F	CACNA1F	Definite	CACNA1F	VERAPAMIL	inhibitor	TdgClinicalTrial|TEND|DrugBank	19125880
CACNA1F	CACNA1F	Definite	CACNA1F	NIFEDIPINE	gating inhibitor|blocker	GuideToPharmacologyInteractions|ChemblInteractions
CACNA1F	CACNA1F	Definite	CACNA1F	NITRENDIPINE	gating inhibitor	GuideToPharmacologyInteractions
CACNA1F	CACNA1F	Definite	CACNA1F	ISRADIPINE	gating inhibitor|blocker	GuideToPharmacologyInteractions|ChemblInteractions
CACNA1F	CACNA1F	Definite	CACNA1F	BEPRIDIL HYDROCHLORIDE	blocker	ChemblInteractions
CACNA1F	CACNA1F	Definite	CACNA1F	PREGABALIN	modulator	ChemblInteractions
CACNA1F	CACNA1F	Definite	CACNA1F	GABAPENTIN	modulator	ChemblInteractions
CACNA1F	CACNA1F	Definite	CACNA1F	DILTIAZEM HYDROCHLORIDE	blocker	ChemblInteractions
CACNA1F	CACNA1F	Definite	CACNA1F	DRONEDARONE HYDROCHLORIDE	blocker	ChemblInteractions
CACNA1F	CACNA1F	Definite	CACNA1F	AMLODIPINE MALEATE	blocker	ChemblInteractions
CACNA1F	CACNA1F	Definite	CACNA1F	GABAPENTIN ENACARBIL	modulator	ChemblInteractions
CACNA1F	CACNA1F	Definite	CACNA1F	VERAPAMIL HYDROCHLORIDE	blocker	ChemblInteractions
CACNA1F	CACNA1F	Definite	CACNA1F	DILTIAZEM MALATE	blocker	ChemblInteractions
CACNA1F	CACNA1F	Definite	CACNA1F	NISOLDIPINE	blocker	ChemblInteractions
CACNA1F	CACNA1F	Definite	CACNA1F	FELODIPINE	blocker	ChemblInteractions
CACNA1F	CACNA1F	Definite	CACNA1F	CLEVIDIPINE	blocker	TdgClinicalTrial|ChemblInteractions|DrugBank	15492770
CACNA1F	CACNA1F	Definite	CACNA1F	AMLODIPINE BESYLATE	blocker	ChemblInteractions
CACNA1F	CACNA1F	Definite	CACNA1F	NICARDIPINE HYDROCHLORIDE	blocker	ChemblInteractions
CACNA1F	CACNA1F	Definite	CACNA1F	DRONEDARONE		DrugBank
ITGB3	ITGB3	Definite	ITGB3	ABCIXIMAB	inhibitor|antagonist	PharmGKB|TdgClinicalTrial|ChemblInteractions|TEND|DrugBank	18510478|11588534|12749745|17441904|11752352|12165285
ITGB3	ITGB3	Definite	ITGB3	TIROFIBAN	antagonist	PharmGKB|TdgClinicalTrial|TEND|DrugBank	10592235|20210689|11752352
ITGB3	ITGB3	Definite	ITGB3	EPTIFIBATIDE	inhibitor	PharmGKB|TdgClinicalTrial|ChemblInteractions|TEND|DrugBank	12360110|14617694|12928738|11588534|14618072|10592235|15860200
ITGB3	ITGB3	Definite	ITGB3	TIROFIBAN HYDROCHLORIDE	inhibitor	ChemblInteractions
CACNA2D2	CACNA2D2	Definite	CACNA2D2	GABAPENTIN ENACARBIL	modulator	TdgClinicalTrial|ChemblInteractions|DrugBank
CACNA2D2	CACNA2D2	Definite	CACNA2D2	ISRADIPINE	inhibitor	DrugBank	18974361|1281221
CACNA2D2	CACNA2D2	Definite	CACNA2D2	GABAPENTIN	inhibitor|modulator	TdgClinicalTrial|ChemblInteractions|TEND|DrugBank	16899342|17982508|20588320|18299583
CACNA2D2	CACNA2D2	Definite	CACNA2D2	FELODIPINE	inhibitor	DrugBank	18974361|1281221
CACNA2D2	CACNA2D2	Definite	CACNA2D2	NITRENDIPINE	inhibitor	DrugBank	18974361
CACNA2D2	CACNA2D2	Definite	CACNA2D2	BEPRIDIL	inhibitor	DrugBank	1281221|7565636
CACNA2D2	CACNA2D2	Definite	CACNA2D2	PREGABALIN	modulator	ChemblInteractions
CACNA2D2	CACNA2D2	Definite	CACNA2D2	BEPRIDIL HYDROCHLORIDE	blocker	ChemblInteractions
CACNA2D2	CACNA2D2	Definite	CACNA2D2	SAFINAMIDE		TdgClinicalTrial
CACNA1S	CACNA1S	Definite	CACNA1S	ISRADIPINE	inhibitor|blocker	ChemblInteractions|DrugBank	16675661
CACNA1S	CACNA1S	Definite	CACNA1S	NIMODIPINE	inhibitor|blocker	ChemblInteractions|DrugBank	20661350|17705883|16675661|20335610|20334460|19844625
CACNA1S	CACNA1S	Definite	CACNA1S	NISOLDIPINE	inhibitor|blocker	ChemblInteractions|DrugBank	16675661
CACNA1S	CACNA1S	Definite	CACNA1S	CINNARIZINE	inhibitor	DrugBank	1281221|3530295
CACNA1S	CACNA1S	Definite	CACNA1S	VERAPAMIL	inhibitor	TdgClinicalTrial|TEND|DrugBank	19125880
CACNA1S	CACNA1S	Definite	CACNA1S	FELODIPINE	inhibitor|blocker	TdgClinicalTrial|ChemblInteractions|DrugBank	16675661
CACNA1S	CACNA1S	Definite	CACNA1S	NITRENDIPINE	inhibitor	DrugBank	16675661
CACNA1S	CACNA1S	Definite	CACNA1S	NIFEDIPINE	inhibitor|blocker	ChemblInteractions|DrugBank	16675661
CACNA1S	CACNA1S	Definite	CACNA1S	PREGABALIN	modulator	ChemblInteractions
CACNA1S	CACNA1S	Definite	CACNA1S	BEPRIDIL HYDROCHLORIDE	blocker	ChemblInteractions
CACNA1S	CACNA1S	Definite	CACNA1S	GABAPENTIN ENACARBIL	modulator	ChemblInteractions
CACNA1S	CACNA1S	Definite	CACNA1S	CLEVIDIPINE	blocker	TdgClinicalTrial|ChemblInteractions|DrugBank	15492770
CACNA1S	CACNA1S	Definite	CACNA1S	DILTIAZEM HYDROCHLORIDE	blocker	ChemblInteractions
CACNA1S	CACNA1S	Definite	CACNA1S	DRONEDARONE HYDROCHLORIDE	blocker	ChemblInteractions
CACNA1S	CACNA1S	Definite	CACNA1S	AMLODIPINE MALEATE	blocker	ChemblInteractions
CACNA1S	CACNA1S	Definite	CACNA1S	GABAPENTIN	modulator	ChemblInteractions
CACNA1S	CACNA1S	Definite	CACNA1S	VERAPAMIL HYDROCHLORIDE	blocker	ChemblInteractions
CACNA1S	CACNA1S	Definite	CACNA1S	DILTIAZEM MALATE	blocker	ChemblInteractions
CACNA1S	CACNA1S	Definite	CACNA1S	AMLODIPINE BESYLATE	blocker	ChemblInteractions
CACNA1S	CACNA1S	Definite	CACNA1S	NICARDIPINE HYDROCHLORIDE	blocker	ChemblInteractions
CACNA1S	CACNA1S	Definite	CACNA1S	DRONEDARONE		DrugBank
CACNA1S	CACNA1S	Definite	CACNA1S	AMLODIPINE		TdgClinicalTrial
CACNA1S	CACNA1S	Definite	CACNA1S	MAGNESIUM SULFATE		DrugBank	17139284|17016423
TNNC1	TNNC1	Definite	TNNC1	FELODIPINE	other	DrugBank	3178884
TNNC1	TNNC1	Definite	TNNC1	BEPRIDIL	other	TdgClinicalTrial|TEND|DrugBank	2351672|12060657|11591369|9525919
TNNC1	TNNC1	Definite	TNNC1	ALUMINIUM GLYCINATE	stimulator	DrugBank|TTD	11752352
ITGB7	ITGB7	Definite	ITGB7	VEDOLIZUMAB	antibody|inhibitor	TdgClinicalTrial|GuideToPharmacologyInteractions|ChemblInteractions|DrugBank	19509315
ITGB7	ITGB7	Definite	ITGB7	NATALIZUMAB	inhibitor	ChemblInteractions
ITGAV	ITGAV	Definite	ITGAV	ABCIXIMAB	inhibitor	ChemblInteractions
ITGAV	ITGAV	Definite	ITGAV	CYTARABINE		NCI	9252649
ITGB1	ITGB1	Definite	ITGB1	NATALIZUMAB	antibody|inhibitor	GuideToPharmacologyInteractions|ChemblInteractions
ACTC1	ACTC1	Definite	ACTC1	DEXAMETHASONE		NCI	15988617
CACNA2D4	CACNA2D4	Definite	CACNA2D4	PREGABALIN	modulator	ChemblInteractions
CACNA2D4	CACNA2D4	Definite	CACNA2D4	BEPRIDIL HYDROCHLORIDE	blocker	ChemblInteractions
CACNA2D4	CACNA2D4	Definite	CACNA2D4	GABAPENTIN ENACARBIL	modulator	ChemblInteractions
CACNA2D4	CACNA2D4	Definite	CACNA2D4	GABAPENTIN	modulator	ChemblInteractions
TPM3	TPM3	Definite	TPM3	MIDAZOLAM		NCI	16738805
TPM3	TPM3	Definite	TPM3	EPINEPHRINE		NCI	18172836
TPM3	TPM3	Definite	TPM3	THIOGUANINE		NCI	7687657
TPM3	TPM3	Definite	TPM3	PROGESTERONE		NCI	17549730
TPM3	TPM3	Definite	TPM3	CORTICOTROPIN		NCI	17877367
TPM3	TPM3	Definite	TPM3	METHOTREXATE		NCI	8509220
TPM3	TPM3	Definite	TPM3	SIMVASTATIN		NCI	10720627
CACNG2	CACNG2	Definite	CACNG2	BEPRIDIL HYDROCHLORIDE	blocker	ChemblInteractions
CACNG2	CACNG2	Definite	CACNG2	PREGABALIN	modulator	ChemblInteractions
CACNG2	CACNG2	Definite	CACNG2	GABAPENTIN	modulator	ChemblInteractions
CACNG2	CACNG2	Definite	CACNG2	GABAPENTIN ENACARBIL	modulator	ChemblInteractions
CACNG3	CACNG3	Definite	CACNG3	BEPRIDIL HYDROCHLORIDE	blocker	ChemblInteractions
CACNG3	CACNG3	Definite	CACNG3	PREGABALIN	modulator	ChemblInteractions
CACNG3	CACNG3	Definite	CACNG3	GABAPENTIN	modulator	ChemblInteractions
CACNG3	CACNG3	Definite	CACNG3	GABAPENTIN ENACARBIL	modulator	ChemblInteractions
LAMA2	LAMA2	Definite	LAMA2	OCRIPLASMIN		ChemblInteractions
TGFB1	TGFB1	Definite	TGFB1	HYALURONIDASE (HUMAN RECOMBINANT)	Inhibitor	DrugBank	9435505|11327694|7648625|9850732
TGFB1	TGFB1	Definite	TGFB1	PIRFENIDONE		NCI	12907346
TGFB1	TGFB1	Definite	TGFB1	TRIAMCINOLONE		NCI	12174062
TGFB1	TGFB1	Definite	TGFB1	VITAMIN E		NCI	1505665|9608545
TGFB1	TGFB1	Definite	TGFB1	ATENOLOL		NCI	15049387
TGFB1	TGFB1	Definite	TGFB1	NICOTINE		NCI	10198208
TGFB1	TGFB1	Definite	TGFB1	HYDROCORTISONE		NCI	7895901
TGFB1	TGFB1	Definite	TGFB1	ETOPOSIDE		NCI	16002781
TGFB1	TGFB1	Definite	TGFB1	HYDROGEN PEROXIDE		NCI	9722602
TGFB1	TGFB1	Definite	TGFB1	GLATIRAMER ACETATE		PharmGKB
TGFB1	TGFB1	Definite	TGFB1	TOREMIFENE		NCI	12476040
TGFB1	TGFB1	Definite	TGFB1	ESTRADIOL		NCI	11498938
TGFB1	TGFB1	Definite	TGFB1	MELATONIN		NCI	9649124
TGFB1	TGFB1	Definite	TGFB1	ISOTRETINOIN		NCI	9815590
TGFB1	TGFB1	Definite	TGFB1	STREPTOZOTOCIN		NCI	17968528
TGFB1	TGFB1	Definite	TGFB1	CLADRIBINE		NCI	12097998
TGFB1	TGFB1	Definite	TGFB1	AMIFOSTINE		NCI	12005544
TGFB1	TGFB1	Definite	TGFB1	TESTOSTERONE		NCI	9288184
TGFB1	TGFB1	Definite	TGFB1	VERAPAMIL		NCI	16975733
TGFB1	TGFB1	Definite	TGFB1	RAMIPRIL		NCI	15716710
TGFB1	TGFB1	Definite	TGFB1	INTERFERON ALFA-2B		NCI	12567763
TGFB1	TGFB1	Definite	TGFB1	TAMOXIFEN		NCI	8019941
TGFB1	TGFB1	Definite	TGFB1	GALLIUM NITRATE		NCI	8381250
TGFB1	TGFB1	Definite	TGFB1	PIOGLITAZONE		NCI	17407709
TGFB1	TGFB1	Definite	TGFB1	TRETINOIN		NCI	8940178
TGFB1	TGFB1	Definite	TGFB1	IDOXURIDINE		NCI	1313063
TGFB1	TGFB1	Definite	TGFB1	DOXORUBICIN		NCI	12956904
ACTB	ACTB	Definite	ACTB	CYCLOPHOSPHAMIDE		NCI	12167460
ACTB	ACTB	Definite	ACTB	ETHINYL ESTRADIOL		NCI	17288598
ITGA2	ITGA2	Definite	ITGA2	ABCIXIMAB	antibody	GuideToPharmacologyInteractions
ITGA2	ITGA2	Definite	ITGA2	EPTIFIBATIDE	inhibitor	GuideToPharmacologyInteractions
ITGA2	ITGA2	Definite	ITGA2	TIROFIBAN	inhibitor	GuideToPharmacologyInteractions
CACNG5	CACNG5	Definite	CACNG5	BEPRIDIL HYDROCHLORIDE	blocker	ChemblInteractions
CACNG5	CACNG5	Definite	CACNG5	PREGABALIN	modulator	ChemblInteractions
CACNG5	CACNG5	Definite	CACNG5	GABAPENTIN	modulator	ChemblInteractions
CACNG5	CACNG5	Definite	CACNG5	GABAPENTIN ENACARBIL	modulator	ChemblInteractions
CACNG4	CACNG4	Definite	CACNG4	BEPRIDIL HYDROCHLORIDE	blocker	ChemblInteractions
CACNG4	CACNG4	Definite	CACNG4	PREGABALIN	modulator	ChemblInteractions
CACNG4	CACNG4	Definite	CACNG4	GABAPENTIN	modulator	ChemblInteractions
CACNG4	CACNG4	Definite	CACNG4	GABAPENTIN ENACARBIL	modulator	ChemblInteractions
GNAS	GNAS	Definite	GNAS	FLUOROURACIL		CIViC	19274060
DES	DES	Definite	DES	THROMBIN		NCI	3040412

## Sheet: ST2h
Supplementary File 2h: Single drug-gene interactions in the Hedgehog signalling pathway gene-set (KEGG)
search_term	match_term	match_type	gene	drug	interaction_types	sources	pmids
LRP2	LRP2	Definite	LRP2	UROKINASE		DrugBank	7959795|17139284|8241286|1280065|17016423
LRP2	LRP2	Definite	LRP2	INSULIN HUMAN		DrugBank	17139284|17016423
SMO	SMO	Definite	SMO	VISMODEGIB	inhibitor|antagonist	TALC|MyCancerGenome|CKB|GuideToPharmacologyInteractions|ChemblInteractions|CGI|CIViC|DrugBank|DoCM	26676867|25306392|19726788|25759020|26823493|22550175|23662017|25759019|22679179
SMO	SMO	Definite	SMO	FLUOCINONIDE	agonist	DrugBank	20439738
SMO	SMO	Definite	SMO	HALCINONIDE	agonist|activator	DrugBank	26658258
SMO	SMO	Definite	SMO	ERISMODEGIB	antagonist|inhibitor	TALC|MyCancerGenome|TdgClinicalTrial|CKB|GuideToPharmacologyInteractions|CIViC|DrugBank|MyCancerGenomeClinicalTrial	26546616|26323341|26823493|25759019|26124204
SMO	SMO	Definite	SMO	SONIDEGIB PHOSPHATE	inhibitor	ChemblInteractions
SMO	SMO	Definite	SMO	ARSENIC TRIOXIDE		CKB|CIViC	25759020|26823493|21183792
SMO	SMO	Definite	SMO	POSACONAZOLE		CKB	26823493
SMO	SMO	Definite	SMO	GEFITINIB		CKB|CIViC	26124204
SHH	SHH	Definite	SHH	CAFFEINE		NCI	15456933
SHH	SHH	Definite	SHH	TRETINOIN		NCI	10404648
GSK3B	GSK3B	Definite	GSK3B	LITHIUM CITRATE HYDRATE	inhibitor	ChemblInteractions
GSK3B	GSK3B	Definite	GSK3B	LITHIUM CARBONATE	inhibitor	ChemblInteractions
GSK3B	GSK3B	Definite	GSK3B	FLUOXETINE		PharmGKB
BTRC	BTRC	Definite	BTRC	GEMCITABINE		PharmGKB
GLI1	GLI1	Definite	GLI1	TRETINOIN		NCI	11034076
SUFU	SUFU	Definite	SUFU	ERISMODEGIB		CIViC	24651015
PTCH1	PTCH1	Definite	PTCH1	VISMODEGIB	inhibitor	MyCancerGenome|OncoKB|CGI|CIViC	24900187|22670903|24651015|19726763|22670904|24523439|19726761
PTCH1	PTCH1	Definite	PTCH1	ERISMODEGIB		OncoKB|CIViC	24900187|22670903|24651015|22670904|24523439
PTCH1	PTCH1	Definite	PTCH1	TRETINOIN		NCI	12455633

[truncated: 8 more sheets: ST2i, ST2j, ST2k, ST2l, ST2m, ST2n, ST2o, ST2p]
