# Supplementary material for: Genetic association and causal inference converge on hyperglycaemia as a modifiable factor to improve lung function
Source: eLife journal article supplement (doi:10.7554/elife.63115), 2021-03-15
Supplement: supp [file elife-63115-supp-v1.zip › elife_poa_e63115_Supplementary_File_3.xlsx]

## Sheet: Index
Supplementary File 3: Index
Supplementary File 3a: Genome wide polygenic score (PGS) of lung function in the Hunter Community Study cohort
Supplementary File 3b: Pharmagenic enrichment scores tested in the Hunter Community Study cohort (unadjusted for genome-wide PGS)
Supplementary File 3c: Association of pharmagenic enrichment scores (PES) with lung function in the Hunter Community Study cohort - covariation for genome-wide PGS
Supplementary File 3d: Correlation between the FEV1 Pathways in cancer PES and gene expression in the geuvadis cohort
Supplementary File 3e: Correlation between the FVC Pathways in cancer PES and gene expression in the geuvadis cohort
Supplementary File 3f: Correlation between the FVC ECM PES and gene expression in the geuvadis cohort
Supplementary File 3g: Correlation between the FEV1 Extension of telomeres PES and gene expression in the geuvadis cohort
Supplementary File 3h: Correlation between the FEV1 Dilated cardiomyopathy PES and gene expression in the geuvadis cohort
Supplementary File 3i: Correlation between the FVC Class b2 secretin PES and gene expression in the geuvadis cohort
Supplementary File 3j: Correlation between the FVC Circadian clock PES and gene expression in the geuvadis cohort
Supplementary File 3k: Transcriptome-wide association study (TWAS) of FEV1 using lung tissue derived SNP weights
Supplementary File 3l: Transcriptome-wide association study (TWAS) of FVC using lung tissue derived SNP weights
Supplementary File 3m: Transcriptome-wide association study (TWAS) of FEV1 using whole blood derived SNP weights
Supplementary File 3n: Transcriptome-wide association study (TWAS) of FVC using whole blood derived SNP weights
Supplementary File 3o: Transcriptome-wide association study (TWAS) of Cigarettes per day using whole blood derived SNP weights
Supplementary File 3p: Transcriptome-wide association study (TWAS) of Ever vs never smoked using whole blood derived SNP weights
Supplementary File 3q: Transcriptome-wide association study (TWAS) of Cigarettes per day using brain (DLPFC) derived SNP weights
Supplementary File 3r: Transcriptome-wide association study (TWAS) of Ever vs never smoked using brain (DLPFC) derived SNP weights
Supplementary File 3s: Transcriptome-wide association study (TWAS) of Cigarettes per day using lung tissue derived SNP weights
Supplementary File 3t: Transcriptome-wide association study (TWAS) of Ever vs never smoked using lung tissue derived SNP weights
Supplementary File 3u: Transcriptome-wide association study (TWAS) of Cigarettes per day using brain (Nucleus accumbens) derived SNP weights
Supplementary File 3v Transcriptome-wide association study (TWAS) of Ever vs never smoked using brain (Nucleus accumbens) derived SNP weights
Supplementary File 3w: Candidate drug-gene interactions with lung function increasing potential based on the sign of the TWAS Z value

## Sheet: Table_legends
Supplementary File 3a
P threshold	P value threshold of variant inclusion in the PGS
R2	Variance explained by the PGS (Full model - Null model)
P	Association P value
Lung_phenotype	Lung phenotype for which the score was constructed and tested
Supplementary File 3b
Phenotype	Lung phenotype for which the score was constructed and tested
PES	The name of the PES
P threshold	P value threshold of variant inclusion in the PES
PES R2	Variance explained by the PES (Full model - Null model)
Full R2	Full model R2
Null R2	Null model R2 (covariates only)
Coefficient	Beta coefficient
Standard Error	Standard error of the beta coefficient
P	Association P value
Num_SNP	Number of SNPs in the score
Empirical-P	Empirical P value (10,000 permutations)
Supplementary File 3c
PES	The name of the PES
Beta	Beta coefficient
SE	Standard error of the beta coefficient
P	Association P value
Lung_phenotype	Lung phenotype for which the score was constructed and tested
Supplementary File 3d-3j
Gene_ID	Ensembl stable ID for the gene tested
t value	Beta coefficient/Standard error
P	Association P value
q-value	FDR corrected P value
Supplementary File 3k-3v
PANEL	Reference weights
ID	Feature/gene identifier, taken from --weights file
CHR	Chromosome
P0	Gene start (from --weights)
P1	Gene end (from --weights)
HSQ	Heritability of the gene
BEST.GWAS.ID	rsID of the most significant GWAS SNP in locus
BEST.GWAS.Z	Z-score of the most significant GWAS SNP in locus
EQTL.ID	rsID of the best eQTL in the locus
EQTL.R2	cross-validation R2 of the best eQTL in the locus
EQTL.Z	Z-score of the best eQTL in the locus
EQTL.GWAS.Z	GWAS Z-score for this eQTL
NSNP	Number of SNPs in the locus
MODEL	Best performing model
MODELCV.R2	cross-validation R2 of the best performing model
MODELCV.PV	cross-validation P-value of the best performing model
TWAS.Z	TWAS Z-score
TWAS.P	TWAS P-value
Supplementary File 3w
Lung_trait	Lung trait tested
Gene	Gene symbol
TWAS_Z	TWAS Z (Z > 0 = increased expression correlated with increased FEV1 or FVC, Z < 0 = decreased expression correlated with increased FEV1 or FVC)
Tissue	Tissue weights used
Compound	Drug name
Interaction_type	Type of interaction (same direction as TWAS Z)
Evidence	Evidence of interaction between drug and gene
FDA_approval	Whether the drug has FDA approval
Tier	Tier 1 = FDA approved ( at least 2 lines of evidence for interaction), Tier 2 = investigational (at least 2 lines of evidence for interaction)

## Sheet: ST3a
Supplementary File 3a: Genome wide polygenic score (PGS) of lung function in the Hunter Community Study cohort
P Threshold	R2	P	Coefficient	Standard Error	Num_SNP	Phenotype
5e-08	0.0251878	1.22781e-11	420.804	61.6905	608	FEV1
5e-05	0.0408286	4.58964e-18	1532.19	175.002	2448	FEV1
0.005	0.064152	8.65569e-28	6844.07	615.979	14371	FEV1
0.05	0.058607	1.85086e-25	15770.5	1489.41	52186	FEV1
0.5	0.0481703	4.18357e-21	42350	4436.14	213508	FEV1
1	0.0486381	2.67436e-21	56965.4	5936.87	289956	FEV1
5e-08	0.017774	1.33727e-08	349.89	61.3032	508	FVC
5e-05	0.0346102	1.69038e-15	1500.3	186.749	2364	FVC
0.005	0.0484612	3.20855e-21	6102.39	637.296	14364	FVC
0.05	0.056852	1.0209e-24	15542.5	1491.97	52091	FVC
0.5	0.0457656	4.21271e-20	40375.4	4345.11	212715	FVC
1	0.0451013	7.93907e-20	53410.8	5792.15	288559	FVC

## Sheet: ST3b
Supplementary File 3b: Pharmagenic enrichment scores tested in the Hunter Community Study cohort (unadjusted for genome-wide PGS)
Phenotype	PES	P Threshold	PES R2	Full R2	Null R2	Coefficient	Standard Error	P	Num_SNP
FEV1	Dilated cardiomyopathy	1	1.28922e-05	0.00204519	0.0020323	100.002	656.337	0.878917	2404
FEV1	Extension of telomeres	0.05	1.70446e-05	0.00204935	0.0020323	-9.90774	56.5538	0.860949	44
FEV1	Pathways in cancer	1	0.00490664	0.00693894	0.0020323	3162.32	1061.28	0.00292349	6214
FVC	Circadian clock	0.05	0.00254131	0.00429543	0.00175412	53.855	118.535	0.0323596	230
FVC	Class b2 secretin family receptors	0.005	0.00546185	0.00721598	0.00175412	152.002	48.3428	0.00169226	76
FVC	ECM	1	0.00675905	0.00851317	0.00175412	6041.97	1726.26	0.000476486	16390
FVC	Pathways in cancer	1	0.00385052	0.00560465	0.00175412	2758.09	1045.57	0.0084144	6212

## Sheet: ST3c
Supplementary File 3c: Association of pharmagenic enrichment scores (PES) with lung function in the Hunter Community Study cohort - covariation for genome-wide PGS
PES	Beta	SE	P	Lung_phenotype
Pathways in cancer	0.03242	0.02323	0.163	FEV1
Circadian clock	0.02881	0.02261	0.203	FVC
Pathways in cancer	0.02353	0.02313	0.309	FVC
Class b2 secretin family receptors	0.04721	0.02276	0.0382	FVC
Extracellular matrix (ECM) proteins	0.01707	0.02389	0.475	FVC

## Sheet: ST3d
Supplementary File 3d: Correlation between the FEV1 Pathways in cancer PES and gene expression in the geuvadis cohort
Gene_ID	t value	P	q-value
ENSG00000096384	3.17924	0.00160835	0.455164
ENSG00000017797	2.70746	0.00711265	0.586693
ENSG00000006451	2.68136	0.00767973	0.586693
ENSG00000142208	2.53521	0.0116728	0.586693
ENSG00000087088	2.44282	0.0150668	0.586693
ENSG00000080824	2.40164	0.0168424	0.586693
ENSG00000067560	2.27694	0.0233929	0.586693
ENSG00000166598	2.26467	0.0241438	0.586693
ENSG00000115596	2.22963	0.0264059	0.586693
ENSG00000177885	2.21753	0.0272284	0.586693
ENSG00000100985	2.18562	0.0295054	0.586693
ENSG00000197943	2.16643	0.0309525	0.586693
ENSG00000141646	2.15979	0.0314675	0.586693
ENSG00000130702	2.1456	0.0325923	0.586693
ENSG00000145604	2.12341	0.0344207	0.586693
ENSG00000134086	2.09465	0.0369202	0.586693
ENSG00000213281	2.0693	0.0392519	0.586693
ENSG00000131759	2.05317	0.040799	0.586693
ENSG00000129521	2.04315	0.0417859	0.586693
ENSG00000182578	-2.02659	0.0434618	0.586693
ENSG00000168610	2.02107	0.0440338	0.586693
ENSG00000141510	2.00616	0.0456087	0.586693
ENSG00000164171	-1.96338	0.0503932	0.603127
ENSG00000007171	-1.95695	0.0511486	0.603127
ENSG00000119535	1.91471	0.0563439	0.618297
ENSG00000113721	1.91113	0.0568047	0.618297
ENSG00000116478	1.88676	0.0600205	0.627954
ENSG00000213341	1.87136	0.0621297	0.627954
ENSG00000116062	1.81816	0.0698941	0.68207
ENSG00000131788	1.78533	0.0750733	0.705557
ENSG00000197461	-1.76271	0.0788216	0.705557
ENSG00000175104	1.75707	0.0797803	0.705557
ENSG00000168646	-1.707	0.0887087	0.7164
ENSG00000139687	1.69531	0.0909055	0.7164
ENSG00000164161	-1.69256	0.0914298	0.7164
ENSG00000173757	-1.68601	0.0926858	0.7164
ENSG00000103126	1.66833	0.0961451	0.7164
ENSG00000047410	1.66697	0.0964141	0.7164
ENSG00000113318	1.65547	0.0987264	0.7164
ENSG00000187323	-1.59206	0.112275	0.77033
ENSG00000106799	-1.55806	0.120123	0.77033
ENSG00000136238	1.54925	0.122225	0.77033
ENSG00000078061	1.54888	0.122315	0.77033
ENSG00000111276	1.54268	0.123813	0.77033
ENSG00000084207	1.54041	0.124364	0.77033
ENSG00000136997	1.52944	0.127057	0.77033
ENSG00000169032	1.51128	0.131618	0.77033
ENSG00000056558	-1.50636	0.132877	0.77033
ENSG00000125952	1.50441	0.133379	0.77033
ENSG00000124762	1.48949	0.137259	0.773056
ENSG00000105989	-1.47435	0.141286	0.773056
ENSG00000175387	1.47153	0.142046	0.773056
ENSG00000085741	1.43766	0.151423	0.777231
ENSG00000064012	-1.41987	0.156535	0.777231
ENSG00000105229	1.41897	0.156798	0.777231
ENSG00000106571	-1.40733	0.160218	0.777231
ENSG00000166501	1.40165	0.161905	0.777231
ENSG00000168040	1.39819	0.162943	0.777231
ENSG00000135679	1.39709	0.163273	0.777231
ENSG00000117461	-1.38947	0.165572	0.777231
ENSG00000108094	1.38305	0.16753	0.777231
ENSG00000140464	1.35432	0.176507	0.79158
ENSG00000128340	1.34102	0.180783	0.79158
ENSG00000105647	1.33302	0.183391	0.79158
ENSG00000138798	1.33269	0.183501	0.79158
ENSG00000100485	1.32763	0.185164	0.79158
ENSG00000172115	-1.30838	0.191603	0.79158
ENSG00000092969	1.28928	0.198154	0.79158
ENSG00000105329	1.28263	0.200471	0.79158
ENSG00000185920	1.27608	0.202774	0.79158
ENSG00000162552	-1.27383	0.203567	0.79158
ENSG00000051382	1.27258	0.20401	0.79158
ENSG00000099942	1.2708	0.204644	0.79158
ENSG00000076604	-1.26424	0.206985	0.79158
ENSG00000107882	1.25071	0.211877	0.799482
ENSG00000110395	1.22539	0.221253	0.810899
ENSG00000154229	-1.21997	0.223296	0.810899
ENSG00000114354	1.21944	0.223499	0.810899
ENSG00000117394	1.20424	0.229311	0.819003
ENSG00000164930	1.19777	0.231816	0.819003
ENSG00000168036	-1.19029	0.234738	0.819003
ENSG00000134982	1.17907	0.239173	0.819003
ENSG00000050748	-1.17048	0.242604	0.819003
ENSG00000015475	-1.15924	0.247149	0.819003
ENSG00000157764	1.14623	0.252482	0.819003
ENSG00000049130	-1.14565	0.252723	0.819003
ENSG00000134954	1.14387	0.253458	0.819003
ENSG00000100906	-1.13852	0.255681	0.819003
ENSG00000091409	1.13401	0.257566	0.819003
ENSG00000169398	1.11771	0.264457	0.820713
ENSG00000150093	1.11207	0.26687	0.820713
ENSG00000128602	-1.10391	0.270391	0.820713
ENSG00000154342	1.10358	0.270532	0.820713
ENSG00000126934	1.09881	0.272604	0.820713
ENSG00000164305	1.09183	0.275659	0.821175
ENSG00000174804	-1.08203	0.279982	0.825364
ENSG00000112715	-1.07318	0.283929	0.825668
ENSG00000105221	1.06588	0.287213	0.825668
ENSG00000152284	1.06229	0.288838	0.825668
ENSG00000053747	-1.0552	0.29206	0.82653
ENSG00000081059	-1.03221	0.302688	0.838552
ENSG00000100030	1.02431	0.306397	0.838552
ENSG00000173801	1.01802	0.30937	0.838552
ENSG00000110330	1.01625	0.310211	0.838552
ENSG00000107643	1.01125	0.312596	0.838552
ENSG00000100644	1.00813	0.314087	0.838552
ENSG00000082701	0.993825	0.320995	0.844396
ENSG00000115266	0.982085	0.326736	0.844396
ENSG00000157240	0.98178	0.326887	0.844396
ENSG00000144118	0.979093	0.32821	0.844396
ENSG00000124181	0.967675	0.333875	0.844873
ENSG00000004975	0.966689	0.334367	0.844873
ENSG00000159216	-0.95541	0.34003	0.85158
ENSG00000077092	0.945733	0.344937	0.856291
ENSG00000105976	0.898297	0.369645	0.908755
ENSG00000143437	0.892958	0.372493	0.908755
ENSG00000127191	-0.866598	0.386756	0.935487
ENSG00000115415	0.860066	0.390341	0.936157
ENSG00000051180	0.830658	0.406733	0.956789
ENSG00000076242	0.830085	0.407057	0.956789
ENSG00000005884	0.815047	0.4156	0.956789
ENSG00000138795	-0.788319	0.431044	0.956789
ENSG00000108091	0.77626	0.43812	0.956789
ENSG00000107831	-0.76076	0.447313	0.956789
ENSG00000163251	0.758229	0.448824	0.956789
ENSG00000171608	-0.757241	0.449415	0.956789
ENSG00000135925	0.754287	0.451184	0.956789
ENSG00000196730	-0.749979	0.453771	0.956789
ENSG00000150907	-0.747756	0.45511	0.956789
ENSG00000110092	0.74485	0.456862	0.956789
ENSG00000105810	0.744729	0.456935	0.956789
ENSG00000133703	0.744528	0.457057	0.956789
ENSG00000169083	-0.740517	0.459483	0.956789
ENSG00000135862	0.726483	0.468029	0.956789
ENSG00000131323	-0.725824	0.468432	0.956789
ENSG00000122025	-0.721548	0.471054	0.956789
ENSG00000125845	0.704837	0.481381	0.956789
ENSG00000198223	0.698233	0.485495	0.956789
ENSG00000169750	0.695546	0.487175	0.956789
ENSG00000133101	-0.675306	0.499927	0.956789
ENSG00000068078	-0.673192	0.501269	0.956789
ENSG00000134871	-0.669908	0.503358	0.956789
ENSG00000126561	0.667527	0.504875	0.956789
ENSG00000091483	0.659986	0.509697	0.956789
ENSG00000068028	0.65805	0.510938	0.956789
ENSG00000141736	0.652974	0.514202	0.956789
ENSG00000167193	0.648076	0.517361	0.956789
ENSG00000117020	0.643674	0.520209	0.956789
ENSG00000157404	-0.641882	0.52137	0.956789
ENSG00000114251	0.634063	0.526454	0.956789
ENSG00000125618	-0.622009	0.534341	0.956789
ENSG00000139618	0.617931	0.537023	0.956789
ENSG00000147889	0.617401	0.537372	0.956789
ENSG00000115904	0.616414	0.538022	0.956789
ENSG00000081052	0.612017	0.540924	0.956789
ENSG00000066032	-0.589324	0.556024	0.956789
ENSG00000163235	-0.587852	0.557011	0.956789
ENSG00000077782	0.587509	0.557241	0.956789
ENSG00000109339	-0.583459	0.55996	0.956789
ENSG00000005961	0.583411	0.559992	0.956789
ENSG00000115414	-0.58116	0.561507	0.956789
ENSG00000164690	-0.581074	0.561565	0.956789
ENSG00000171791	0.563949	0.57315	0.956789
ENSG00000155760	-0.55973	0.576022	0.956789
ENSG00000111186	0.545449	0.585793	0.956789
ENSG00000035664	-0.527662	0.598068	0.956789
ENSG00000114423	0.523952	0.600644	0.956789
ENSG00000101109	0.521974	0.602019	0.956789
ENSG00000033800	0.521566	0.602302	0.956789
ENSG00000108379	-0.514299	0.607368	0.956789
ENSG00000165731	-0.513291	0.608071	0.956789
ENSG00000112033	-0.507759	0.611942	0.956789
ENSG00000177606	-0.501041	0.616657	0.956789
ENSG00000089685	-0.497596	0.619081	0.956789
ENSG00000105173	0.496896	0.619574	0.956789
ENSG00000132170	0.486842	0.626675	0.956789
ENSG00000170345	0.485904	0.62734	0.956789
ENSG00000143816	-0.48288	0.629483	0.956789
ENSG00000002330	0.480425	0.631225	0.956789
ENSG00000066336	-0.472812	0.636642	0.956789
ENSG00000171552	0.466087	0.641443	0.956789
ENSG00000100311	-0.46071	0.645293	0.956789
ENSG00000095002	0.453147	0.650723	0.956789
ENSG00000104290	0.452223	0.651389	0.956789
ENSG00000175305	-0.448834	0.653829	0.956789
ENSG00000167657	0.447157	0.655039	0.956789
ENSG00000158815	0.44254	0.658372	0.956789
ENSG00000107404	0.435057	0.66379	0.956789
ENSG00000173039	-0.433359	0.665021	0.956789
ENSG00000102882	0.430578	0.66704	0.956789
ENSG00000023445	0.426978	0.669658	0.956789
ENSG00000174775	0.425555	0.670694	0.956789
ENSG00000138448	0.421032	0.67399	0.956789
ENSG00000112242	0.411964	0.680618	0.956789
ENSG00000173511	0.399022	0.690121	0.956789
ENSG00000039068	-0.398419	0.690564	0.956789
ENSG00000097007	0.396701	0.69183	0.956789
ENSG00000111087	0.392352	0.695037	0.956789
ENSG00000180340	0.389352	0.697253	0.956789
ENSG00000005339	0.383264	0.701757	0.956789
ENSG00000157500	0.369204	0.712199	0.956789
ENSG00000172037	-0.36811	0.713014	0.956789
ENSG00000140285	0.358601	0.72011	0.956789
ENSG00000187098	0.353997	0.723554	0.956789
ENSG00000147883	0.3488	0.727449	0.956789
ENSG00000019991	0.333469	0.73898	0.956789
ENSG00000100393	0.329806	0.741744	0.956789
ENSG00000161958	0.329451	0.742012	0.956789
ENSG00000075290	0.328594	0.742659	0.956789
ENSG00000114279	-0.327433	0.743536	0.956789
ENSG00000196569	0.322274	0.747438	0.956789
ENSG00000101966	0.322141	0.747538	0.956789
ENSG00000116016	-0.316229	0.752018	0.956789
ENSG00000156427	-0.315812	0.752334	0.956789
ENSG00000103363	0.315586	0.752505	0.956789
ENSG00000145675	-0.3128	0.754619	0.956789
ENSG00000177283	-0.310619	0.756275	0.956789
ENSG00000135766	0.306506	0.759402	0.956789
ENSG00000091136	0.305277	0.760336	0.956789
ENSG00000165197	-0.300906	0.763665	0.956789
ENSG00000017427	-0.300409	0.764043	0.956789
ENSG00000075651	0.300011	0.764347	0.956789
ENSG00000188763	-0.299079	0.765057	0.956789
ENSG00000101412	-0.291992	0.770466	0.956789
ENSG00000138685	0.286975	0.774301	0.956789
ENSG00000143549	-0.285737	0.775248	0.956789
ENSG00000073756	-0.279682	0.779887	0.956789
ENSG00000169884	0.276719	0.78216	0.956789
ENSG00000198793	-0.273338	0.784754	0.956789
ENSG00000187498	-0.271255	0.786355	0.956789
ENSG00000070831	-0.266383	0.790101	0.956789
ENSG00000140443	0.262556	0.793047	0.956789
ENSG00000026103	0.256414	0.797782	0.956789
ENSG00000119630	0.256252	0.797907	0.956789
ENSG00000007968	-0.255362	0.798593	0.956789
ENSG00000134853	0.254523	0.799241	0.956789
ENSG00000136244	-0.248675	0.803758	0.956789
ENSG00000125378	0.247522	0.80465	0.956789
ENSG00000175029	0.231667	0.816932	0.95962
ENSG00000163482	0.228568	0.819338	0.95962
ENSG00000134245	0.202752	0.839447	0.95962
ENSG00000077150	-0.201153	0.840696	0.95962
ENSG00000058085	0.19883	0.842511	0.95962
ENSG00000100387	0.196012	0.844714	0.95962
ENSG00000141506	-0.19203	0.84783	0.95962
ENSG00000173207	0.191809	0.848003	0.95962
ENSG00000196878	-0.187875	0.851084	0.95962
ENSG00000109320	0.186402	0.852238	0.95962
ENSG00000105851	-0.179427	0.857706	0.95962
ENSG00000166949	0.177313	0.859365	0.95962
ENSG00000132155	-0.175909	0.860467	0.95962
ENSG00000186716	0.173832	0.862098	0.95962
ENSG00000132906	0.170089	0.865038	0.95962
ENSG00000002745	0.164102	0.869745	0.95962
ENSG00000167034	0.16072	0.872407	0.95962
ENSG00000082512	0.157717	0.87477	0.95962
ENSG00000204231	0.155142	0.876799	0.95962
ENSG00000135446	0.154263	0.877492	0.95962
ENSG00000117425	0.149171	0.881504	0.95962
ENSG00000197565	-0.149012	0.88163	0.95962
ENSG00000104365	0.141459	0.887589	0.962405
ENSG00000119699	0.128168	0.898089	0.969284
ENSG00000172379	-0.120596	0.90408	0.969284
ENSG00000196591	-0.110109	0.912386	0.969284
ENSG00000171862	0.107223	0.914674	0.969284
ENSG00000154582	0.105179	0.916294	0.969284
ENSG00000146648	0.102357	0.918532	0.969284
ENSG00000123374	0.0995461	0.920762	0.969284
ENSG00000186350	0.0960855	0.923508	0.969284
ENSG00000163513	0.0914688	0.927172	0.969284
ENSG00000101680	-0.0901954	0.928184	0.969284
ENSG00000161202	0.0802937	0.93605	0.973905
ENSG00000102678	0.0731068	0.941763	0.974849
ENSG00000159692	0.0644269	0.948667	0.974849
ENSG00000121879	-0.0630038	0.949799	0.974849
ENSG00000188064	0.0618266	0.950736	0.974849
ENSG00000148737	0.0481935	0.961589	0.982418
ENSG00000090554	-0.0389073	0.968986	0.986005
ENSG00000044115	-0.0350394	0.972068	0.986005
ENSG00000160271	-0.0294019	0.976561	0.987024
ENSG00000078043	0.0242699	0.980651	0.987631
ENSG00000162434	0.0167481	0.986647	0.990146
ENSG00000169429	0.00803598	0.993593	0.993593

## Sheet: ST3e
Supplementary File 3e: Correlation between the FVC Pathways in cancer PES and gene expression in the geuvadis cohort
Gene_ID	t value	P	q-value
ENSG00000096384	3.71863	0.000233189	0.0659924
ENSG00000142208	3.40947	0.000726843	0.102848
ENSG00000115596	2.66372	0.00808547	0.589437
ENSG00000175104	2.58232	0.0102194	0.589437
ENSG00000080824	2.5315	0.0117946	0.589437
ENSG00000177885	2.50373	0.0127439	0.589437
ENSG00000131788	2.37434	0.0181191	0.589437
ENSG00000108094	2.29001	0.022615	0.589437
ENSG00000141510	2.28161	0.0231126	0.589437
ENSG00000145604	2.21505	0.0274	0.589437
ENSG00000168610	2.20717	0.0279503	0.589437
ENSG00000129521	2.03367	0.0427389	0.589437
ENSG00000103126	2.03279	0.0428284	0.589437
ENSG00000085741	1.99876	0.0464074	0.589437
ENSG00000100985	1.97447	0.0491141	0.589437
ENSG00000154229	-1.94402	0.0526945	0.589437
ENSG00000007171	-1.94163	0.0529836	0.589437
ENSG00000164161	-1.93598	0.053675	0.589437
ENSG00000131759	1.92929	0.0545027	0.589437
ENSG00000141646	1.92547	0.0549803	0.589437
ENSG00000135925	1.92496	0.0550443	0.589437
ENSG00000171791	1.92209	0.0554055	0.589437
ENSG00000173757	-1.91099	0.0568221	0.589437
ENSG00000135679	1.90632	0.0574271	0.589437
ENSG00000213281	1.88799	0.0598536	0.589437
ENSG00000136244	-1.88358	0.0604511	0.589437
ENSG00000187323	-1.86858	0.0625158	0.589437
ENSG00000182578	-1.8595	0.0637959	0.589437
ENSG00000130702	1.84959	0.0652153	0.589437
ENSG00000134086	1.84887	0.0653203	0.589437
ENSG00000150093	1.84121	0.0664369	0.589437
ENSG00000168036	-1.83525	0.0673169	0.589437
ENSG00000084207	1.81684	0.0700973	0.589437
ENSG00000116062	1.81218	0.0708157	0.589437
ENSG00000213341	1.77035	0.0775396	0.610772
ENSG00000197943	1.7622	0.0789087	0.610772
ENSG00000047410	1.75664	0.0798536	0.610772
ENSG00000136997	1.72171	0.0860051	0.628144
ENSG00000078061	1.71864	0.0865641	0.628144
ENSG00000105229	1.68073	0.093707	0.662977
ENSG00000006451	1.63496	0.102957	0.710655
ENSG00000185920	1.61571	0.107058	0.721367
ENSG00000173801	1.59543	0.111519	0.733952
ENSG00000136238	1.57472	0.116225	0.747538
ENSG00000116478	1.55655	0.120481	0.757693
ENSG00000017797	1.50386	0.133518	0.821429
ENSG00000140285	1.47023	0.142398	0.827928
ENSG00000174775	1.43729	0.151529	0.827928
ENSG00000100485	1.42715	0.154428	0.827928
ENSG00000163235	-1.42512	0.155013	0.827928
ENSG00000087088	1.39152	0.164951	0.827928
ENSG00000107643	1.3886	0.165836	0.827928
ENSG00000105976	1.37639	0.16958	0.827928
ENSG00000162552	-1.36257	0.173893	0.827928
ENSG00000056558	-1.33778	0.181837	0.827928
ENSG00000106571	-1.33139	0.183928	0.827928
ENSG00000117020	1.3165	0.188868	0.827928
ENSG00000101109	1.3158	0.189103	0.827928
ENSG00000107882	1.30901	0.191391	0.827928
ENSG00000109339	-1.30727	0.191979	0.827928
ENSG00000092969	1.30407	0.193068	0.827928
ENSG00000166598	1.29862	0.194928	0.827928
ENSG00000119535	1.28435	0.199867	0.827928
ENSG00000152284	1.28331	0.200233	0.827928
ENSG00000115266	1.27228	0.204119	0.827928
ENSG00000123374	-1.26345	0.207267	0.827928
ENSG00000051382	1.25195	0.211424	0.827928
ENSG00000154342	1.24829	0.21276	0.827928
ENSG00000114354	1.24562	0.213738	0.827928
ENSG00000145675	-1.24091	0.215471	0.827928
ENSG00000166501	1.2245	0.221585	0.827928
ENSG00000112242	1.21373	0.22567	0.827928
ENSG00000162434	-1.21263	0.226088	0.827928
ENSG00000139687	1.20331	0.229669	0.827928
ENSG00000128602	-1.20171	0.230288	0.827928
ENSG00000165197	-1.19834	0.231595	0.827928
ENSG00000110395	1.18719	0.235957	0.827928
ENSG00000081059	-1.18648	0.236236	0.827928
ENSG00000174804	-1.17936	0.239057	0.827928
ENSG00000175305	-1.17082	0.242466	0.827928
ENSG00000148737	1.17024	0.2427	0.827928
ENSG00000125952	1.16434	0.24508	0.827928
ENSG00000173511	1.16347	0.245432	0.827928
ENSG00000169750	1.15073	0.250628	0.827928
ENSG00000113721	1.14854	0.251531	0.827928
ENSG00000169032	1.1435	0.253613	0.827928
ENSG00000126934	1.14131	0.254522	0.827928
ENSG00000134954	1.11231	0.266769	0.846959
ENSG00000197461	-1.10832	0.268485	0.846959
ENSG00000175387	1.10631	0.269351	0.846959
ENSG00000064012	-1.07313	0.283953	0.873502
ENSG00000015475	-1.0731	0.283965	0.873502
ENSG00000049130	-1.048	0.295364	0.881932
ENSG00000117461	-1.02904	0.30417	0.881932
ENSG00000095002	1.02884	0.304264	0.881932
ENSG00000168040	1.02658	0.305328	0.881932
ENSG00000150907	-1.02235	0.307322	0.881932
ENSG00000067560	1.00848	0.313919	0.881932
ENSG00000164171	-0.994204	0.32081	0.881932
ENSG00000198793	-0.990493	0.322617	0.881932
ENSG00000138795	-0.986835	0.324405	0.881932
ENSG00000077782	0.984283	0.325656	0.881932
ENSG00000005339	0.979973	0.327776	0.881932
ENSG00000051180	0.968042	0.333692	0.881932
ENSG00000127191	-0.964855	0.335283	0.881932
ENSG00000157404	-0.95765	0.338901	0.881932
ENSG00000168646	-0.954977	0.340248	0.881932
ENSG00000070831	-0.949645	0.342948	0.881932
ENSG00000134982	0.932863	0.351534	0.881932
ENSG00000141506	-0.927262	0.35443	0.881932
ENSG00000103363	0.926058	0.355054	0.881932
ENSG00000111276	0.925492	0.355348	0.881932
ENSG00000076604	-0.894391	0.371727	0.881932
ENSG00000169083	-0.891428	0.373312	0.881932
ENSG00000112033	-0.890399	0.373863	0.881932
ENSG00000117394	0.889956	0.374101	0.881932
ENSG00000050748	-0.885027	0.37675	0.881932
ENSG00000122025	-0.882923	0.377884	0.881932
ENSG00000143549	-0.882822	0.377938	0.881932
ENSG00000105989	-0.881103	0.378866	0.881932
ENSG00000139618	0.880007	0.379459	0.881932
ENSG00000154582	0.878644	0.380197	0.881932
ENSG00000053747	-0.856052	0.392555	0.890492
ENSG00000138798	0.84803	0.397001	0.890492
ENSG00000002330	0.843891	0.399307	0.890492
ENSG00000100030	0.835251	0.404146	0.890492
ENSG00000102882	0.825192	0.409825	0.890492
ENSG00000005961	0.825071	0.409893	0.890492
ENSG00000007968	-0.822121	0.411568	0.890492
ENSG00000107404	0.821878	0.411706	0.890492
ENSG00000125618	-0.820998	0.412207	0.890492
ENSG00000140464	0.812822	0.416872	0.891686
ENSG00000165731	0.809007	0.419061	0.891686
ENSG00000108379	-0.798357	0.425204	0.898007
ENSG00000105329	0.787772	0.431363	0.898181
ENSG00000035664	-0.78288	0.434227	0.898181
ENSG00000004975	0.781889	0.434808	0.898181
ENSG00000177606	-0.759366	0.448145	0.911815
ENSG00000171608	-0.758372	0.448739	0.911815
ENSG00000188763	0.75447	0.451074	0.911815
ENSG00000175029	0.741939	0.458622	0.920496
ENSG00000157764	0.735456	0.462554	0.921707
ENSG00000068028	0.728065	0.46706	0.921707
ENSG00000159216	-0.724903	0.468996	0.921707
ENSG00000089685	-0.718768	0.472764	0.922704
ENSG00000066336	0.699603	0.48464	0.930705
ENSG00000017427	-0.694869	0.487599	0.930705
ENSG00000044115	0.691594	0.489651	0.930705
ENSG00000124762	0.690721	0.490198	0.930705
ENSG00000124181	-0.681411	0.496062	0.930705
ENSG00000107831	-0.676675	0.499059	0.930705
ENSG00000198223	0.671608	0.502276	0.930705
ENSG00000077150	0.646496	0.518382	0.930705
ENSG00000164690	0.645679	0.51891	0.930705
ENSG00000187098	0.645141	0.519258	0.930705
ENSG00000167193	0.644346	0.519773	0.930705
ENSG00000113318	0.642439	0.521009	0.930705
ENSG00000169884	0.64237	0.521053	0.930705
ENSG00000114279	0.636875	0.524623	0.930705
ENSG00000068078	0.633928	0.526542	0.930705
ENSG00000177283	-0.625192	0.532253	0.930705
ENSG00000082512	0.610078	0.542206	0.930705
ENSG00000196591	-0.608999	0.54292	0.930705
ENSG00000186716	0.602234	0.547408	0.930705
ENSG00000075651	-0.600076	0.548844	0.930705
ENSG00000091136	0.593474	0.553247	0.930705
ENSG00000157500	0.593449	0.553264	0.930705
ENSG00000132155	0.585611	0.558514	0.930705
ENSG00000196569	0.582418	0.56066	0.930705
ENSG00000135862	-0.579274	0.562777	0.930705
ENSG00000167657	0.579203	0.562825	0.930705
ENSG00000155760	-0.575004	0.565658	0.930705
ENSG00000105221	0.569635	0.56929	0.931267
ENSG00000186350	0.554935	0.579294	0.942184
ENSG00000005884	0.546814	0.584855	0.943923
ENSG00000164305	0.540552	0.58916	0.943923
ENSG00000105647	0.53476	0.593156	0.943923
ENSG00000073756	-0.533966	0.593704	0.943923
ENSG00000147883	-0.52461	0.600186	0.945492
ENSG00000125378	-0.520135	0.603299	0.945492
ENSG00000097007	0.493058	0.622281	0.945492
ENSG00000163251	0.489966	0.624465	0.945492
ENSG00000104290	0.488309	0.625637	0.945492
ENSG00000099942	0.47999	0.631534	0.945492
ENSG00000134871	-0.474039	0.635768	0.945492
ENSG00000002745	-0.473847	0.635904	0.945492
ENSG00000119630	0.472953	0.636542	0.945492
ENSG00000101966	0.469585	0.638944	0.945492
ENSG00000100906	-0.468766	0.639529	0.945492
ENSG00000172379	0.463948	0.642974	0.945492
ENSG00000204231	0.460273	0.645606	0.945492
ENSG00000196730	-0.443558	0.657636	0.945492
ENSG00000161202	0.441923	0.658818	0.945492
ENSG00000131323	0.436071	0.663054	0.945492
ENSG00000135766	-0.427011	0.669634	0.945492
ENSG00000102678	-0.424666	0.671341	0.945492
ENSG00000157240	0.423462	0.672218	0.945492
ENSG00000171552	0.419278	0.67527	0.945492
ENSG00000167034	0.411478	0.680974	0.945492
ENSG00000173039	0.408656	0.683042	0.945492
ENSG00000144118	-0.40531	0.685497	0.945492
ENSG00000133101	-0.401908	0.687997	0.945492
ENSG00000105810	0.401862	0.688031	0.945492
ENSG00000082701	0.399603	0.689693	0.945492
ENSG00000140443	-0.395251	0.692898	0.945492
ENSG00000135446	0.390104	0.696697	0.945492
ENSG00000039068	-0.385535	0.700076	0.945492
ENSG00000115415	0.384726	0.700674	0.945492
ENSG00000156427	0.378912	0.704983	0.945492
ENSG00000172115	-0.373608	0.708922	0.945492
ENSG00000169429	-0.372703	0.709595	0.945492
ENSG00000114251	0.370682	0.711099	0.945492
ENSG00000091409	0.364631	0.715607	0.945492
ENSG00000100387	-0.364627	0.71561	0.945492
ENSG00000121879	-0.361014	0.718307	0.945492
ENSG00000146648	-0.347351	0.728536	0.950517
ENSG00000110330	0.346944	0.728842	0.950517
ENSG00000111087	0.341414	0.732997	0.951551
ENSG00000105173	0.326321	0.744377	0.960049
ENSG00000197565	-0.32258	0.747206	0.960049
ENSG00000143816	0.305364	0.76027	0.960049
ENSG00000187498	-0.304153	0.761192	0.960049
ENSG00000075290	0.301692	0.763066	0.960049
ENSG00000134853	0.300768	0.76377	0.960049
ENSG00000109320	0.293982	0.768946	0.960049
ENSG00000159692	0.290055	0.771946	0.960049
ENSG00000110092	0.276526	0.782307	0.960049
ENSG00000077092	0.275367	0.783196	0.960049
ENSG00000117425	0.274545	0.783827	0.960049
ENSG00000111186	0.266875	0.789722	0.960049
ENSG00000141736	0.258901	0.795864	0.960049
ENSG00000108091	0.258562	0.796125	0.960049
ENSG00000119699	0.253802	0.799797	0.960049
ENSG00000100311	0.249676	0.802985	0.960049
ENSG00000115414	-0.249148	0.803392	0.960049
ENSG00000058085	0.249052	0.803467	0.960049
ENSG00000116016	0.244697	0.806834	0.960049
ENSG00000112715	-0.243977	0.807391	0.960049
ENSG00000081052	0.228408	0.819462	0.966311
ENSG00000104365	0.221795	0.824603	0.966311
ENSG00000172037	0.220123	0.825904	0.966311
ENSG00000134245	-0.219594	0.826315	0.966311
ENSG00000169398	0.209879	0.833884	0.968769
ENSG00000125845	0.20811	0.835264	0.968769
ENSG00000138685	0.196286	0.8445	0.974113
ENSG00000105851	-0.186345	0.852282	0.974113
ENSG00000106799	-0.178379	0.858529	0.974113
ENSG00000114423	0.171387	0.864019	0.974113
ENSG00000132170	-0.169312	0.865649	0.974113
ENSG00000126561	0.169291	0.865666	0.974113
ENSG00000171862	0.167446	0.867116	0.974113
ENSG00000133703	0.160805	0.87234	0.974113
ENSG00000188064	-0.158298	0.874313	0.974113
ENSG00000132906	-0.15324	0.878297	0.974113
ENSG00000173207	0.149864	0.880959	0.974113
ENSG00000090554	0.146748	0.883416	0.974113
ENSG00000143437	0.145223	0.884618	0.974113
ENSG00000023445	-0.138736	0.889739	0.975954
ENSG00000115904	0.131784	0.895231	0.976099
ENSG00000160271	-0.122091	0.902897	0.976099
ENSG00000196878	0.122011	0.90296	0.976099
ENSG00000066032	-0.121117	0.903668	0.976099
ENSG00000100393	0.106505	0.915242	0.979909
ENSG00000101680	0.101446	0.919255	0.979909
ENSG00000101412	-0.0957323	0.923788	0.979909
ENSG00000166949	-0.0944989	0.924767	0.979909
ENSG00000158815	0.089172	0.928996	0.979909
ENSG00000161958	0.0880851	0.929859	0.979909
ENSG00000128340	0.0827663	0.934085	0.979909
ENSG00000180340	0.0802629	0.936074	0.979909
ENSG00000163482	-0.0773893	0.938358	0.979909
ENSG00000091483	0.0653836	0.947906	0.981502
ENSG00000164930	0.0629847	0.949815	0.981502
ENSG00000170345	0.0590232	0.952967	0.981502
ENSG00000019991	0.0580313	0.953757	0.981502
ENSG00000078043	0.0485036	0.961343	0.985724
ENSG00000138448	-0.0404628	0.967747	0.986027
ENSG00000163513	-0.0362239	0.971124	0.986027
ENSG00000026103	0.0350118	0.97209	0.986027
ENSG00000076242	0.0234491	0.981305	0.98839
ENSG00000033800	0.0233237	0.981405	0.98839
ENSG00000100644	0.008586	0.993154	0.996676
ENSG00000147889	-0.00257515	0.997947	0.997947

## Sheet: ST3f
Supplementary File 3f: Correlation between the FVC ECM PES and gene expression in the geuvadis cohort
Gene_ID	t value	P	q-value
ENSG00000105472	-3.20922	0.001454	0.853497
ENSG00000136634	2.95343	0.00335508	0.984717
ENSG00000157890	2.59083	0.00997503	0.99479
ENSG00000134871	2.46009	0.0143727	0.99479
ENSG00000124882	-2.37192	0.0182362	0.99479
ENSG00000221887	-2.35549	0.0190495	0.99479
ENSG00000119862	-2.34855	0.0194022	0.99479
ENSG00000121552	-2.3377	0.0199657	0.99479
ENSG00000188886	2.29853	0.0221202	0.99479
ENSG00000113140	2.29734	0.0221889	0.99479
ENSG00000197632	-2.25763	0.0245845	0.99479
ENSG00000215018	-2.19241	0.0290078	0.99479
ENSG00000116977	2.15699	0.0316868	0.99479
ENSG00000172638	2.1342	0.0335206	0.99479
ENSG00000168811	2.08604	0.0376989	0.99479
ENSG00000008277	-2.06238	0.0399094	0.99479
ENSG00000135919	-2.02681	0.0434397	0.99479
ENSG00000170542	-1.93138	0.0542428	0.99479
ENSG00000140259	1.93134	0.0542481	0.99479
ENSG00000138379	-1.92003	0.0556664	0.99479
ENSG00000108379	-1.90214	0.0579737	0.99479
ENSG00000188379	1.89414	0.0590305	0.99479
ENSG00000138685	1.8882	0.0598266	0.99479
ENSG00000152785	-1.87857	0.0611338	0.99479
ENSG00000164161	1.87288	0.0619177	0.99479
ENSG00000151694	1.87077	0.0622115	0.99479
ENSG00000161381	1.86	0.0637237	0.99479
ENSG00000206561	-1.85734	0.064102	0.99479
ENSG00000142224	1.85466	0.0644855	0.99479
ENSG00000076356	1.85096	0.0650181	0.99479
ENSG00000090659	1.83679	0.0670892	0.99479
ENSG00000187498	1.82943	0.068186	0.99479
ENSG00000130812	1.80918	0.0712804	0.99479
ENSG00000112761	-1.80722	0.0715868	0.99479
ENSG00000173531	1.79458	0.0735839	0.99479
ENSG00000172247	-1.78196	0.0756232	0.99479
ENSG00000142156	1.77242	0.0771949	0.99479
ENSG00000172243	1.77174	0.0773077	0.99479
ENSG00000134013	-1.72377	0.0856317	0.99479
ENSG00000172724	1.70799	0.0885252	0.99479
ENSG00000163703	1.68698	0.0924987	0.99479
ENSG00000179403	1.68472	0.0929344	0.99479
ENSG00000233816	1.68436	0.0930038	0.99479
ENSG00000058085	-1.67742	0.0943531	0.99479
ENSG00000125735	1.6714	0.0955363	0.99479
ENSG00000115009	-1.66629	0.0965509	0.99479
ENSG00000103196	1.66427	0.0969543	0.99479
ENSG00000132692	-1.65788	0.0982367	0.99479
ENSG00000106333	-1.65261	0.0993064	0.99479
ENSG00000186998	-1.62978	0.104047	0.99479
ENSG00000111537	1.62846	0.104327	0.99479
ENSG00000168743	-1.62625	0.104797	0.99479
ENSG00000173269	1.62305	0.105479	0.99479
ENSG00000117586	-1.61154	0.107964	0.99479
ENSG00000122861	-1.59885	0.110757	0.99479
ENSG00000072682	-1.59496	0.111624	0.99479
ENSG00000232810	1.59229	0.112222	0.99479
ENSG00000053747	-1.57858	0.115335	0.99479
ENSG00000156427	1.56515	0.118452	0.99479
ENSG00000131142	1.54666	0.122848	0.99479
ENSG00000174080	1.5432	0.123686	0.99479
ENSG00000137674	-1.50468	0.133308	0.99479
ENSG00000153162	1.5011	0.13423	0.99479
ENSG00000123342	-1.47709	0.140551	0.99479
ENSG00000146530	1.4745	0.141245	0.99479
ENSG00000160213	-1.47033	0.142371	0.99479
ENSG00000185499	-1.46925	0.142663	0.99479
ENSG00000160678	-1.44803	0.148504	0.99479
ENSG00000157322	-1.44774	0.148586	0.99479
ENSG00000197919	1.44444	0.149511	0.99479
ENSG00000099937	1.44423	0.14957	0.99479
ENSG00000226979	1.44039	0.15065	0.99479
ENSG00000131981	1.43541	0.152062	0.99479
ENSG00000115705	1.42442	0.155215	0.99479
ENSG00000171502	1.42344	0.155498	0.99479
ENSG00000002745	1.42301	0.155625	0.99479
ENSG00000169231	1.41377	0.158317	0.99479
ENSG00000149418	-1.41067	0.159229	0.99479
ENSG00000149131	1.39866	0.162802	0.99479
ENSG00000145536	1.38571	0.166719	0.99479
ENSG00000186792	-1.37084	0.171305	0.99479
ENSG00000115318	1.36875	0.171955	0.99479
ENSG00000182871	-1.36851	0.172029	0.99479
ENSG00000132386	-1.36638	0.172697	0.99479
ENSG00000225968	-1.35119	0.177507	0.99479
ENSG00000008516	1.34426	0.179734	0.99479
ENSG00000092421	-1.3358	0.182483	0.99479
ENSG00000156218	-1.33465	0.182857	0.99479
ENSG00000122862	-1.32877	0.184788	0.99479
ENSG00000114948	1.32127	0.187274	0.99479
ENSG00000116962	1.31335	0.189925	0.99479
ENSG00000149380	1.30749	0.191904	0.99479
ENSG00000160111	1.30686	0.192117	0.99479
ENSG00000171236	-1.30195	0.193788	0.99479
ENSG00000196562	1.29936	0.194675	0.99479
ENSG00000186665	-1.29287	0.196908	0.99479
ENSG00000099769	-1.28417	0.199932	0.99479
ENSG00000132000	-1.28314	0.200291	0.99479
ENSG00000166897	1.27972	0.201492	0.99479
ENSG00000163520	1.27944	0.201589	0.99479
ENSG00000136040	-1.2769	0.202484	0.99479
ENSG00000009724	1.27587	0.202847	0.99479
ENSG00000101439	-1.27561	0.202938	0.99479
ENSG00000113520	1.26968	0.205043	0.99479
ENSG00000156103	1.26907	0.205259	0.99479
ENSG00000173546	-1.26778	0.205719	0.99479
ENSG00000162552	-1.26448	0.206901	0.99479
ENSG00000115414	-1.26321	0.207353	0.99479
ENSG00000205277	1.26195	0.207808	0.99479
ENSG00000074695	-1.25787	0.209278	0.99479
ENSG00000186660	1.25626	0.209858	0.99479
ENSG00000184371	1.2549	0.210352	0.99479
ENSG00000166147	-1.25169	0.211519	0.99479
ENSG00000125966	-1.24209	0.215035	0.99479
ENSG00000100311	-1.24021	0.215728	0.99479
ENSG00000196878	-1.23824	0.216458	0.99479
ENSG00000168758	1.23563	0.217426	0.99479
ENSG00000113083	1.23423	0.217945	0.99479
ENSG00000127578	1.2259	0.22106	0.99479
ENSG00000102265	-1.22195	0.22255	0.99479
ENSG00000175899	-1.20088	0.23061	0.99479
ENSG00000168477	1.19138	0.234314	0.99479
ENSG00000110492	-1.18505	0.236803	0.99479
ENSG00000100473	1.17672	0.240108	0.99479
ENSG00000082293	1.17641	0.240231	0.99479
ENSG00000152580	1.17433	0.24106	0.99479
ENSG00000196154	1.1732	0.241515	0.99479
ENSG00000116199	-1.17279	0.241679	0.99479
ENSG00000142871	1.17139	0.24224	0.99479
ENSG00000204262	-1.16947	0.243011	0.99479
ENSG00000169495	-1.16692	0.244037	0.99479
ENSG00000136999	-1.16086	0.246489	0.99479
ENSG00000204248	1.14946	0.251153	0.99479
ENSG00000175189	-1.14403	0.253393	0.99479
ENSG00000205863	-1.13747	0.256118	0.99479
ENSG00000141753	-1.13692	0.256351	0.99479
ENSG00000107831	1.1353	0.257029	0.99479
ENSG00000163359	1.13454	0.257343	0.99479
ENSG00000186340	-1.1335	0.25778	0.99479
ENSG00000168615	-1.13127	0.258716	0.99479
ENSG00000102524	-1.12574	0.261046	0.99479
ENSG00000140545	-1.12511	0.261314	0.99479
ENSG00000104055	-1.12285	0.26227	0.99479
ENSG00000152583	1.12229	0.26251	0.99479
ENSG00000102996	1.12139	0.262889	0.99479
ENSG00000106302	-1.12106	0.26303	0.99479
ENSG00000166523	1.10941	0.268016	0.99479
ENSG00000242550	-1.10612	0.269433	0.99479
ENSG00000125538	1.1012	0.271568	0.99479
ENSG00000151092	-1.09862	0.27269	0.99479
ENSG00000116194	-1.09481	0.274351	0.99479
ENSG00000153993	1.08814	0.277281	0.99479
ENSG00000110002	1.08705	0.277761	0.99479
ENSG00000182718	-1.08369	0.27925	0.99479
ENSG00000164099	1.07904	0.281315	0.99479
ENSG00000142798	-1.0771	0.28218	0.99479
ENSG00000178467	1.07669	0.282359	0.99479
ENSG00000112280	-1.07468	0.283257	0.99479
ENSG00000196189	1.0696	0.285536	0.99479
ENSG00000198732	1.0632	0.288423	0.99479
ENSG00000109321	-1.06279	0.288612	0.99479
ENSG00000112715	-1.06103	0.289407	0.99479
ENSG00000198959	1.04832	0.295215	0.99479
ENSG00000130702	1.0471	0.295775	0.99479
ENSG00000158859	1.04592	0.296319	0.99479
ENSG00000152952	1.04529	0.296608	0.99479
ENSG00000188730	-1.03839	0.299807	0.99479
ENSG00000163235	1.01702	0.309844	0.99479
ENSG00000162591	-1.01561	0.310519	0.99479
ENSG00000042980	1.01238	0.312054	0.99479
ENSG00000035862	1.00713	0.314568	0.99479
ENSG00000104332	-1.00625	0.314989	0.99479
ENSG00000135925	1.00496	0.315613	0.99479
ENSG00000139269	0.996902	0.319501	0.99479
ENSG00000197915	-0.994564	0.320635	0.99479
ENSG00000130513	0.992434	0.321672	0.99479
ENSG00000172534	-0.985868	0.324879	0.99479
ENSG00000140839	-0.982595	0.326486	0.99479
ENSG00000114378	-0.981263	0.327141	0.99479
ENSG00000108950	0.975295	0.330088	0.99479
ENSG00000138798	0.969267	0.333081	0.99479
ENSG00000124391	-0.966688	0.334368	0.99479
ENSG00000083444	-0.952511	0.341495	0.99479
ENSG00000197956	0.952504	0.341499	0.99479
ENSG00000151388	0.945431	0.345091	0.99479
ENSG00000103811	0.944962	0.34533	0.99479
ENSG00000158458	-0.941082	0.347312	0.99479
ENSG00000163191	-0.938877	0.348442	0.99479
ENSG00000108342	-0.934621	0.350628	0.99479
ENSG00000115008	0.932385	0.35178	0.99479
ENSG00000184164	0.931129	0.352429	0.99479
ENSG00000120235	0.928422	0.353829	0.99479
ENSG00000172322	0.927353	0.354382	0.99479
ENSG00000170962	0.926863	0.354636	0.99479
ENSG00000112902	0.924774	0.355721	0.99479
ENSG00000143184	0.916446	0.360064	0.99479
ENSG00000110169	0.9157	0.360455	0.99479
ENSG00000165985	0.903806	0.36672	0.99479
ENSG00000122884	0.898171	0.369712	0.99479
ENSG00000114279	-0.89723	0.370213	0.99479
ENSG00000136689	-0.891499	0.373274	0.99479
ENSG00000075213	0.888489	0.374888	0.99479
ENSG00000135074	-0.88302	0.377831	0.99479
ENSG00000068001	0.869523	0.385157	0.99479
ENSG00000164050	-0.869181	0.385344	0.99479
ENSG00000173702	0.864987	0.387639	0.99479
ENSG00000173918	-0.858188	0.391376	0.99479
ENSG00000164111	0.854937	0.393171	0.99479
ENSG00000143185	0.854031	0.393672	0.99479
ENSG00000143631	0.84577	0.398259	0.99479
ENSG00000168542	0.843656	0.399438	0.99479
ENSG00000242689	0.841654	0.400557	0.99479
ENSG00000019991	0.841133	0.400848	0.99479
ENSG00000064601	-0.838592	0.402271	0.99479
ENSG00000082196	0.838063	0.402567	0.99479
ENSG00000154342	0.834656	0.404481	0.99479
ENSG00000133466	-0.825462	0.409672	0.99479
ENSG00000143434	-0.820106	0.412714	0.99479
ENSG00000176390	-0.818153	0.413827	0.99479
ENSG00000137441	-0.816449	0.414799	0.99479
ENSG00000105989	-0.808952	0.419092	0.99479
ENSG00000090530	-0.806063	0.420754	0.99479
ENSG00000163536	-0.804173	0.421843	0.99479
ENSG00000137801	0.799493	0.424547	0.99479
ENSG00000164692	0.798204	0.425293	0.99479
ENSG00000105664	0.794171	0.427634	0.99479
ENSG00000076716	-0.785225	0.432853	0.99479
ENSG00000135862	-0.783984	0.43358	0.99479
ENSG00000100593	0.782695	0.434335	0.99479
ENSG00000121858	0.77995	0.435948	0.99479
ENSG00000169436	0.777824	0.437198	0.99479
ENSG00000070404	-0.77774	0.437248	0.99479
ENSG00000196358	0.776053	0.438242	0.99479
ENSG00000106624	0.774291	0.439281	0.99479
ENSG00000136943	0.771211	0.441102	0.99479
ENSG00000156574	0.769938	0.441856	0.99479
ENSG00000113302	0.768948	0.442443	0.99479
ENSG00000167992	-0.767526	0.443286	0.99479
ENSG00000117407	0.764182	0.445274	0.99479
ENSG00000170054	0.763874	0.445457	0.99479
ENSG00000138615	-0.760365	0.447548	0.99479
ENSG00000140470	0.756797	0.449681	0.99479
ENSG00000118004	0.743699	0.457557	0.99479
ENSG00000100399	0.739247	0.460253	0.99479
ENSG00000138623	-0.738184	0.460897	0.99479
ENSG00000160161	-0.735965	0.462245	0.99479
ENSG00000150281	-0.732215	0.464527	0.99479
ENSG00000100100	-0.727165	0.467611	0.99479
ENSG00000134028	0.726114	0.468254	0.99479
ENSG00000158270	-0.720899	0.471453	0.99479
ENSG00000113070	-0.71646	0.474185	0.99479
ENSG00000111536	0.713934	0.475744	0.99479
ENSG00000138722	-0.7139	0.475765	0.99479
ENSG00000198759	-0.71285	0.476413	0.99479
ENSG00000197747	0.712512	0.476623	0.99479
ENSG00000143369	-0.710208	0.478048	0.99479
ENSG00000178031	-0.710027	0.47816	0.99479
ENSG00000142173	-0.708815	0.478911	0.99479
ENSG00000065320	-0.702824	0.482632	0.99479
ENSG00000205846	0.698091	0.485584	0.99479
ENSG00000125650	-0.695343	0.487302	0.99479
ENSG00000087303	-0.689303	0.491089	0.99479
ENSG00000147485	-0.686178	0.493055	0.99479
ENSG00000145198	0.680884	0.496395	0.99479
ENSG00000106809	-0.679469	0.49729	0.99479
ENSG00000189171	-0.677867	0.498304	0.99479
ENSG00000143537	0.671768	0.502174	0.99479
ENSG00000109861	0.671065	0.502622	0.99479
ENSG00000139899	0.670591	0.502924	0.99479
ENSG00000099953	0.668206	0.504442	0.99479
ENSG00000187122	-0.667714	0.504756	0.99479
ENSG00000114270	-0.667586	0.504838	0.99479
ENSG00000170801	-0.667504	0.50489	0.99479
ENSG00000196739	0.666159	0.505749	0.99479
ENSG00000253309	-0.663116	0.507693	0.99479
ENSG00000106952	0.660045	0.509659	0.99479
ENSG00000085465	-0.658498	0.510651	0.99479
ENSG00000111186	0.6567	0.511805	0.99479
ENSG00000242252	-0.655429	0.512622	0.99479
ENSG00000143412	0.654707	0.513086	0.99479
ENSG00000159450	-0.65406	0.513503	0.99479
ENSG00000104368	0.65393	0.513586	0.99479
ENSG00000140092	0.650852	0.515569	0.99479
ENSG00000150893	-0.649103	0.516698	0.99479
ENSG00000131187	-0.647979	0.517424	0.99479
ENSG00000182566	0.647202	0.517925	0.99479
ENSG00000187912	0.642908	0.520704	0.99479
ENSG00000138829	0.642872	0.520728	0.99479
ENSG00000150782	0.642725	0.520824	0.99479
ENSG00000129521	0.639252	0.523077	0.99479
ENSG00000130508	0.634481	0.526181	0.99479
ENSG00000114554	-0.633121	0.527068	0.99479
ENSG00000049323	-0.627007	0.531063	0.99479
ENSG00000120659	0.626271	0.531545	0.99479
ENSG00000104938	0.624598	0.532642	0.99479
ENSG00000049130	0.608756	0.543081	0.99479
ENSG00000166401	0.604882	0.545649	0.99479
ENSG00000137251	0.600821	0.548348	0.99479
ENSG00000102962	-0.59941	0.549287	0.99479
ENSG00000101160	0.59907	0.549514	0.99479
ENSG00000132205	0.595149	0.552128	0.99479
ENSG00000101938	-0.593892	0.552968	0.99479
ENSG00000090006	0.593861	0.552988	0.99479
ENSG00000169031	0.58576	0.558415	0.99479
ENSG00000115884	0.585372	0.558675	0.99479
ENSG00000172349	0.584254	0.559426	0.99479
ENSG00000183087	0.577337	0.564083	0.99479
ENSG00000105329	-0.569617	0.569303	0.99479
ENSG00000239697	-0.564586	0.572717	0.99479
ENSG00000169752	-0.564273	0.57293	0.99479
ENSG00000116690	0.557718	0.577394	0.99479
ENSG00000164176	0.546917	0.584785	0.99479
ENSG00000169116	-0.545834	0.585527	0.99479
ENSG00000105205	-0.54005	0.589506	0.99479
ENSG00000172458	-0.539647	0.589783	0.99479
ENSG00000198753	-0.538393	0.590648	0.99479
ENSG00000075290	-0.536671	0.591836	0.99479
ENSG00000127951	0.535297	0.592784	0.99479
ENSG00000151651	0.534988	0.592998	0.99479
ENSG00000181634	-0.532757	0.59454	0.99479
ENSG00000137142	-0.529218	0.59699	0.99479
ENSG00000122852	0.526681	0.598749	0.99479
ENSG00000138759	-0.525286	0.599717	0.99479
ENSG00000113296	-0.521087	0.602636	0.99479
ENSG00000091879	0.51337	0.608017	0.99479
ENSG00000186652	-0.512396	0.608697	0.99479
ENSG00000081148	-0.51192	0.60903	0.99479
ENSG00000164764	-0.507848	0.61188	0.99479
ENSG00000092295	-0.507487	0.612133	0.99479
ENSG00000145794	0.505718	0.613373	0.99479
ENSG00000227507	0.503518	0.614917	0.99479
ENSG00000041982	0.502814	0.615411	0.99479
ENSG00000080573	0.499438	0.617785	0.99479
ENSG00000185303	0.496116	0.620124	0.99479
ENSG00000132561	0.496115	0.620125	0.99479
ENSG00000159674	0.494144	0.621515	0.99479
ENSG00000197859	-0.492894	0.622397	0.99479
ENSG00000050767	-0.490792	0.623881	0.99479
ENSG00000187720	-0.489606	0.624719	0.99479
ENSG00000171747	0.489495	0.624798	0.99479
ENSG00000169194	0.487801	0.625996	0.99479
ENSG00000037749	-0.486857	0.626665	0.99479
ENSG00000164932	0.485274	0.627785	0.99479
ENSG00000125378	0.481066	0.63077	0.99479
ENSG00000175356	-0.48088	0.630903	0.99479
ENSG00000140479	-0.479922	0.631583	0.99479
ENSG00000118785	0.479905	0.631595	0.99479
ENSG00000176697	0.479699	0.631741	0.99479
ENSG00000169884	0.476502	0.634014	0.99479
ENSG00000143382	0.475495	0.634731	0.99479
ENSG00000169429	-0.472872	0.636599	0.99479
ENSG00000158815	-0.471865	0.637317	0.99479
ENSG00000106927	0.47097	0.637955	0.99479
ENSG00000134245	-0.468372	0.63981	0.99479
ENSG00000004399	-0.467621	0.640347	0.99479
ENSG00000143387	-0.46657	0.641098	0.99479
ENSG00000021355	-0.464795	0.642367	0.99479
ENSG00000110811	-0.460412	0.645507	0.99479
ENSG00000161955	-0.459847	0.645912	0.99479
ENSG00000049192	0.457526	0.647577	0.99479
ENSG00000165124	-0.457303	0.647737	0.99479
ENSG00000198598	0.45622	0.648515	0.99479
ENSG00000119630	-0.454181	0.64998	0.99479
ENSG00000157335	-0.453031	0.650807	0.99479
ENSG00000137673	0.452041	0.651519	0.99479
ENSG00000198178	0.451419	0.651967	0.99479
ENSG00000163430	-0.447443	0.654832	0.99479
ENSG00000102678	-0.444584	0.656895	0.99479
ENSG00000119681	-0.442197	0.65862	0.99479
ENSG00000173511	0.441154	0.659374	0.99479
ENSG00000167711	0.440833	0.659606	0.99479
ENSG00000143816	0.438571	0.661243	0.99479
ENSG00000084636	0.434639	0.664093	0.99479
ENSG00000163131	0.433593	0.664851	0.99479
ENSG00000139985	0.431731	0.666202	0.99479
ENSG00000157227	0.428376	0.668641	0.99479
ENSG00000187764	0.415139	0.678295	0.99479
ENSG00000116183	0.41421	0.678974	0.99479
ENSG00000185033	-0.414164	0.679008	0.99479
ENSG00000106823	0.413806	0.679269	0.99479
ENSG00000182704	-0.412355	0.680331	0.99479
ENSG00000110852	-0.411902	0.680663	0.99479
ENSG00000176945	0.411407	0.681026	0.99479
ENSG00000162892	0.405081	0.685665	0.99479
ENSG00000073670	-0.402104	0.687853	0.99479
ENSG00000172543	-0.401715	0.688139	0.99479
ENSG00000171916	-0.401442	0.68834	0.99479
ENSG00000162510	-0.401075	0.688609	0.99479
ENSG00000173083	0.398495	0.690508	0.99479
ENSG00000168056	0.398469	0.690528	0.99479
ENSG00000095587	0.392771	0.694727	0.99479
ENSG00000163220	-0.38932	0.697276	0.99479
ENSG00000111729	0.386441	0.699405	0.99479
ENSG00000162512	0.38385	0.701323	0.99479
ENSG00000138316	-0.383215	0.701793	0.99479
ENSG00000122194	0.379179	0.704785	0.99479
ENSG00000141668	-0.377199	0.706254	0.99479
ENSG00000109927	-0.374718	0.708097	0.99479
ENSG00000196576	-0.372188	0.709978	0.99479
ENSG00000185761	0.37115	0.71075	0.99479
ENSG00000162267	0.369319	0.712114	0.99479
ENSG00000204291	0.369147	0.712242	0.99479
ENSG00000169245	0.368653	0.712609	0.99479
ENSG00000145113	-0.366316	0.714351	0.99479
ENSG00000256043	-0.365793	0.714741	0.99479
ENSG00000114251	0.363536	0.716424	0.99479
ENSG00000163710	0.362587	0.717132	0.99479
ENSG00000102970	0.361413	0.718009	0.99479
ENSG00000124145	0.355087	0.722738	0.99479
ENSG00000135253	0.351922	0.725109	0.99479
ENSG00000162804	-0.350281	0.726338	0.99479
ENSG00000184956	-0.348063	0.728002	0.99479
ENSG00000120594	0.347635	0.728323	0.99479
ENSG00000001617	-0.346082	0.729489	0.99479
ENSG00000101955	-0.345008	0.730295	0.99479
ENSG00000162631	-0.341981	0.73257	0.99479
ENSG00000124491	-0.340401	0.733759	0.99479
ENSG00000151882	0.340084	0.733997	0.99479
ENSG00000145824	-0.339776	0.734229	0.99479
ENSG00000187908	0.336616	0.736608	0.99479
ENSG00000164946	0.329746	0.741789	0.99479
ENSG00000140285	-0.325081	0.745314	0.99479
ENSG00000137573	0.323548	0.746474	0.99479
ENSG00000167779	0.323477	0.746527	0.99479
ENSG00000115596	-0.321553	0.747983	0.99479
ENSG00000103310	0.32031	0.748925	0.99479
ENSG00000197614	-0.316997	0.751435	0.99479
ENSG00000171812	0.312562	0.754799	0.99479
ENSG00000164404	-0.310992	0.755992	0.99479
ENSG00000188157	-0.309798	0.756899	0.99479
ENSG00000095752	-0.308513	0.757876	0.99479
ENSG00000091136	-0.305186	0.760406	0.99479
ENSG00000110944	-0.302099	0.762756	0.99479
ENSG00000122176	-0.300762	0.763775	0.99479
ENSG00000197565	0.30062	0.763882	0.99479
ENSG00000115457	0.299689	0.764592	0.99479
ENSG00000104432	-0.29927	0.764911	0.99479
ENSG00000107742	-0.297468	0.766286	0.99479
ENSG00000104899	-0.296518	0.76701	0.99479
ENSG00000125657	-0.295495	0.767791	0.99479
ENSG00000182752	-0.290511	0.771597	0.99479
ENSG00000106397	-0.289184	0.772611	0.99479
ENSG00000049089	-0.287195	0.774133	0.99479
ENSG00000183682	0.287119	0.774191	0.99479
ENSG00000168487	0.284995	0.775816	0.99479
ENSG00000221866	0.283849	0.776694	0.99479
ENSG00000241404	-0.282981	0.777359	0.99479
ENSG00000128342	0.278329	0.780924	0.99479
ENSG00000175505	0.278318	0.780932	0.99479
ENSG00000196569	-0.273045	0.784979	0.99479
ENSG00000138131	-0.272913	0.785081	0.99479
ENSG00000161958	0.270674	0.786801	0.99479
ENSG00000137845	0.265153	0.791048	0.99479
ENSG00000095539	0.264775	0.791339	0.99479
ENSG00000206384	-0.262572	0.793035	0.99479
ENSG00000112706	-0.260796	0.794403	0.99479
ENSG00000171119	0.260733	0.794452	0.99479
ENSG00000100985	-0.259918	0.79508	0.99479
ENSG00000006210	-0.258543	0.79614	0.99479
ENSG00000107821	-0.25721	0.797168	0.99479
ENSG00000168961	0.257008	0.797323	0.99479
ENSG00000168619	0.256252	0.797907	0.99479
ENSG00000085741	-0.255397	0.798566	0.99479
ENSG00000204396	0.254733	0.799079	0.99479
ENSG00000122641	-0.254023	0.799627	0.99479
ENSG00000143341	-0.25162	0.801482	0.99479
ENSG00000172889	0.251145	0.801849	0.99479
ENSG00000134007	0.244163	0.807248	0.99479
ENSG00000172037	0.243045	0.808113	0.99479
ENSG00000196975	0.240381	0.810176	0.99479
ENSG00000100767	-0.239407	0.81093	0.99479
ENSG00000017427	-0.235815	0.813715	0.99479
ENSG00000108821	-0.230519	0.817823	0.99479
ENSG00000188153	0.229259	0.818802	0.99479
ENSG00000174721	-0.226976	0.820575	0.99479
ENSG00000183798	0.226223	0.82116	0.99479
ENSG00000205592	-0.225269	0.821902	0.99479
ENSG00000125845	-0.223168	0.823535	0.99479
ENSG00000135622	0.222914	0.823733	0.99479
ENSG00000188015	-0.221897	0.824523	0.99479
ENSG00000143869	0.220516	0.825598	0.99479
ENSG00000120332	-0.219901	0.826076	0.99479
ENSG00000038427	-0.219848	0.826117	0.99479
ENSG00000164136	-0.219755	0.82619	0.99479
ENSG00000136457	0.219692	0.826239	0.99479
ENSG00000136244	-0.218309	0.827315	0.99479
ENSG00000188937	0.217912	0.827624	0.99479
ENSG00000189334	0.210687	0.833254	0.99479
ENSG00000105246	-0.20912	0.834476	0.99479
ENSG00000160323	0.195836	0.844853	0.99479
ENSG00000111727	-0.193476	0.846699	0.99479
ENSG00000105429	-0.193397	0.84676	0.99479
ENSG00000087263	-0.193103	0.84699	0.99479
ENSG00000138755	0.191621	0.848151	0.99479
ENSG00000077984	-0.190277	0.849202	0.99479
ENSG00000248099	0.188387	0.850682	0.99479
ENSG00000135047	-0.187693	0.851226	0.99479
ENSG00000259384	0.186572	0.852104	0.99479
ENSG00000092758	0.183187	0.854757	0.99479
ENSG00000123243	0.178457	0.858467	0.99479
ENSG00000111325	0.178054	0.858784	0.99479
ENSG00000101680	-0.177724	0.859043	0.99479
ENSG00000164690	-0.176271	0.860183	0.99479
ENSG00000148357	0.176173	0.86026	0.99479
ENSG00000130287	0.173811	0.862114	0.99479
ENSG00000063660	-0.170402	0.864793	0.99479
ENSG00000156535	-0.169957	0.865142	0.99479
ENSG00000188064	-0.161516	0.87178	0.99479
ENSG00000141434	0.157132	0.875232	0.99479
ENSG00000116985	0.15454	0.877273	0.99479
ENSG00000138080	-0.150077	0.88079	0.99479
ENSG00000188372	0.150044	0.880816	0.99479
ENSG00000122359	-0.149987	0.880861	0.99479
ENSG00000130827	0.149572	0.881189	0.99479
ENSG00000154175	-0.14778	0.882602	0.99479
ENSG00000006659	0.146819	0.883359	0.99479
ENSG00000106780	0.145181	0.884652	0.99479
ENSG00000092969	-0.143389	0.886066	0.99479
ENSG00000156234	-0.135549	0.892255	0.99479
ENSG00000123500	-0.132516	0.894652	0.99479
ENSG00000150938	0.132322	0.894806	0.99479
ENSG00000138279	-0.131877	0.895157	0.99479
ENSG00000163810	0.128611	0.89774	0.99479
ENSG00000164400	-0.128524	0.897808	0.99479
ENSG00000135766	0.128397	0.897909	0.99479
ENSG00000136378	0.122397	0.902655	0.99479
ENSG00000107562	-0.121962	0.902999	0.99479
ENSG00000186715	0.110356	0.912191	0.99479
ENSG00000149257	-0.10916	0.913138	0.99479
ENSG00000123610	0.107128	0.914749	0.99479
ENSG00000197461	-0.105467	0.916066	0.99479
ENSG00000012171	0.101239	0.919418	0.99479
ENSG00000179399	0.09696	0.922814	0.99479
ENSG00000119699	-0.0961515	0.923455	0.99479
ENSG00000169218	-0.0933683	0.925664	0.99479
ENSG00000152377	0.093232	0.925773	0.99479
ENSG00000197043	0.0923083	0.926506	0.99479
ENSG00000117984	-0.0880428	0.929893	0.99479
ENSG00000197467	-0.0877174	0.930151	0.99479
ENSG00000148848	-0.0875373	0.930294	0.99479
ENSG00000142910	-0.0838419	0.93323	0.99479
ENSG00000170298	-0.0810652	0.935436	0.99479
ENSG00000069493	-0.0797844	0.936454	0.99479
ENSG00000171855	-0.0772431	0.938474	0.99479
ENSG00000146707	-0.0771021	0.938586	0.99479
ENSG00000146197	0.0763947	0.939149	0.99479
ENSG00000138772	-0.0756871	0.939711	0.99479
ENSG00000099985	0.0739407	0.9411	0.99479
ENSG00000136859	0.0737499	0.941252	0.99479
ENSG00000144810	0.0720021	0.942641	0.99479
ENSG00000135046	-0.0657075	0.947648	0.99479
ENSG00000090554	-0.0648275	0.948348	0.99479
ENSG00000189409	-0.063344	0.949529	0.99479
ENSG00000139219	0.0611661	0.951262	0.99479
ENSG00000130635	0.0611108	0.951306	0.99479
ENSG00000073598	-0.0604697	0.951816	0.99479
ENSG00000055957	-0.0595104	0.95258	0.99479
ENSG00000196754	0.0547414	0.956376	0.99479
ENSG00000197249	-0.0514289	0.959013	0.99479
ENSG00000114646	-0.0503758	0.959852	0.99479
ENSG00000197140	0.0486909	0.961193	0.99479
ENSG00000101230	-0.0459303	0.963392	0.99479
ENSG00000140511	-0.0457514	0.963534	0.99479
ENSG00000042781	0.0454056	0.96381	0.99479
ENSG00000146674	-0.0411797	0.967176	0.99479
ENSG00000243477	-0.041141	0.967207	0.99479
ENSG00000164733	-0.0404076	0.967791	0.99479
ENSG00000183287	0.0375367	0.970078	0.99479
ENSG00000110799	-0.0357251	0.971522	0.99479
ENSG00000169894	-0.0354712	0.971724	0.99479
ENSG00000082684	-0.0317489	0.97469	0.99479
ENSG00000167772	-0.0306869	0.975537	0.99479
ENSG00000196420	-0.0285673	0.977226	0.99479
ENSG00000120708	0.0270533	0.978433	0.99479
ENSG00000240654	-0.0264019	0.978952	0.99479
ENSG00000117385	-0.0254277	0.979728	0.99479
ENSG00000213420	-0.0247528	0.980266	0.99479
ENSG00000108702	0.0198941	0.984139	0.99479
ENSG00000135414	0.0183326	0.985384	0.99479
ENSG00000188107	-0.0177057	0.985884	0.99479
ENSG00000168621	0.0162499	0.987044	0.99479
ENSG00000100097	-0.0153554	0.987757	0.99479
ENSG00000106366	0.00928677	0.992596	0.99479
ENSG00000081052	0.00923666	0.992636	0.99479
ENSG00000261272	-0.00891279	0.992894	0.99479
ENSG00000124570	0.00865951	0.993096	0.99479
ENSG00000055955	-0.000139249	0.999889	0.999889

## Sheet: ST3g
Supplementary File 3g: Correlation between the FEV1 Extension of telomeres PES and gene expression in the geuvadis cohort
Gene_ID	t value	P	q-value
ENSG00000146143	-2.05199	0.0409139	0.728118
ENSG00000101868	-1.86553	0.0629436	0.728118
ENSG00000077514	-1.5379	0.124976	0.728118
ENSG00000130826	-1.42593	0.154779	0.728118
ENSG00000164362	-1.38981	0.165469	0.728118
ENSG00000177084	-1.32635	0.185588	0.728118
ENSG00000106628	-1.31679	0.188771	0.728118
ENSG00000106399	1.12177	0.262729	0.753084
ENSG00000132383	-1.0974	0.27322	0.753084
ENSG00000014138	1.08443	0.27892	0.753084
ENSG00000183207	0.733123	0.463974	0.926463
ENSG00000062822	-0.56446	0.572803	0.926463
ENSG00000138346	-0.563586	0.573397	0.926463
ENSG00000141499	0.517679	0.605009	0.926463
ENSG00000111445	-0.49717	0.619381	0.926463
ENSG00000198056	-0.4851	0.627909	0.926463
ENSG00000163918	0.464307	0.642717	0.926463
ENSG00000132646	-0.433248	0.665102	0.926463
ENSG00000133119	-0.425193	0.670958	0.926463
ENSG00000049541	0.40426	0.686269	0.926463
ENSG00000100479	0.315481	0.752585	0.967441
ENSG00000105486	-0.268744	0.788285	0.967441
ENSG00000175482	0.125148	0.900479	0.982036
ENSG00000145912	0.0416855	0.966773	0.982036
ENSG00000117748	-0.0325205	0.974075	0.982036
ENSG00000168496	0.0268391	0.978603	0.982036
ENSG00000175792	-0.0225331	0.982036	0.982036

## Sheet: ST3h
Supplementary File 3h: Correlation between the FEV1 Dilated cardiomyopathy PES and gene expression in the geuvadis cohort
Gene_ID	t value	P	q-value
ENSG00000164171	-2.09679	0.0367291	0.960653
ENSG00000197616	1.45896	0.145473	0.960653
ENSG00000135424	-1.44316	0.149869	0.960653
ENSG00000162104	-1.42495	0.155062	0.960653
ENSG00000232810	1.40536	0.160802	0.960653
ENSG00000140416	-1.40437	0.161096	0.960653
ENSG00000184009	1.39125	0.165034	0.960653
ENSG00000105329	1.38313	0.167507	0.960653
ENSG00000139626	-1.35114	0.177523	0.960653
ENSG00000143549	1.28911	0.19821	0.960653
ENSG00000183023	-1.28778	0.198672	0.960653
ENSG00000091409	1.28778	0.198674	0.960653
ENSG00000259207	1.17621	0.240309	0.960653
ENSG00000137809	-1.10309	0.270746	0.960653
ENSG00000198467	1.03691	0.300493	0.960653
ENSG00000173175	0.97976	0.327881	0.960653
ENSG00000198947	-0.979724	0.327899	0.960653
ENSG00000017427	0.933813	0.351044	0.960653
ENSG00000157388	0.922506	0.3569	0.960653
ENSG00000167535	0.889102	0.374559	0.960653
ENSG00000075624	0.882058	0.378351	0.960653
ENSG00000183943	-0.858707	0.39109	0.960653
ENSG00000138031	0.846599	0.397797	0.960653
ENSG00000102001	-0.820929	0.412246	0.960653
ENSG00000153956	-0.774967	0.438882	0.960653
ENSG00000165995	0.765934	0.444232	0.960653
ENSG00000092969	0.734951	0.462862	0.960653
ENSG00000119699	0.714317	0.475507	0.960653
ENSG00000087460	0.707615	0.479655	0.960653
ENSG00000129467	-0.699841	0.484492	0.960653
ENSG00000182389	0.635393	0.525587	0.960653
ENSG00000213949	0.629127	0.529676	0.960653
ENSG00000138448	0.586703	0.557781	0.960653
ENSG00000159251	0.57498	0.565674	0.960653
ENSG00000142875	-0.573534	0.566652	0.960653
ENSG00000132470	0.51881	0.604221	0.960653
ENSG00000114854	-0.511849	0.609079	0.960653
ENSG00000108823	-0.509688	0.610591	0.960653
ENSG00000134571	0.486637	0.62682	0.960653
ENSG00000174233	-0.485027	0.627961	0.960653
ENSG00000006116	0.482912	0.62946	0.960653
ENSG00000043591	0.481298	0.630605	0.960653
ENSG00000163069	-0.454737	0.649581	0.960653
ENSG00000161638	0.446907	0.655219	0.960653
ENSG00000160789	0.442742	0.658226	0.960653
ENSG00000142408	-0.438761	0.661105	0.960653
ENSG00000005884	-0.437632	0.661923	0.960653
ENSG00000092054	0.43077	0.6669	0.960653
ENSG00000072062	0.415274	0.678196	0.960653
ENSG00000151067	-0.408701	0.683009	0.960653
ENSG00000174437	0.399122	0.690047	0.960653
ENSG00000105855	-0.335373	0.737545	0.96601
ENSG00000102119	-0.312073	0.755171	0.96601
ENSG00000067191	0.282133	0.778008	0.96601
ENSG00000082781	-0.276171	0.78258	0.96601
ENSG00000005961	0.237783	0.812189	0.96601
ENSG00000078295	-0.232456	0.816319	0.96601
ENSG00000173402	0.224311	0.822646	0.96601
ENSG00000150093	0.19429	0.846061	0.96601
ENSG00000151062	-0.181545	0.856045	0.96601
ENSG00000111245	0.178304	0.858587	0.96601
ENSG00000115232	0.162727	0.870827	0.96601
ENSG00000155657	-0.16223	0.871218	0.96601
ENSG00000164742	0.153252	0.878288	0.96601
ENSG00000167460	0.133438	0.893924	0.96601
ENSG00000075461	0.114296	0.909069	0.96601
ENSG00000121281	-0.0947801	0.924544	0.96601
ENSG00000143127	0.0903518	0.928059	0.96601
ENSG00000144668	-0.0768359	0.938798	0.96601
ENSG00000196569	0.0323649	0.9742	0.988117
ENSG00000007402	0.0139824	0.988852	0.988852

[truncated: 15 more sheets: ST3i, ST3j, ST3k, ST3l, ST3m, ST3n, ST3o, ST3p, ST3q, ST3r, ST3s, ST3t, ST3u, ST3v, ST3w]
