# Supplementary material for: Genetic association and causal inference converge on hyperglycaemia as a modifiable factor to improve lung function
Source: eLife journal article supplement (doi:10.7554/elife.63115), 2021-03-15
Supplement: supp [file elife-63115-supp-v1.zip › elife_poa_e63115_Supplementary_File_4.xlsx]

## Sheet: Index
Supplementary File 4: Index
Supplementary File 4a: SARS-CoV2 host-viral interactome - human genes which putatively interact with a viral SARS-CoV2 protein (Gordon et al.)
Supplementary File 4b: Influenza host-viral interactome - human genes which putatively interact with a viral influenza protein (Watanabe et al, top 91 interacting proteins)
Supplementary File 4c: Human adenovirus host-viral interactome - human genes which putatively interact with a viral adenovirus protein (Martinez-Martin et al)
Supplementary File 4d: SARS-CoV2 viral prey proteins which overlap a glycaemic gene ontology pathway
Supplementary File 4e: SARS-CoV2 viral prey proteins overlapping glycaemic pathways that demonstrate a high-confidence interaction with an antidiabetic drug target
Supplementary File 4f: List of putative antidiabetic compound target genes (DGIdb)

## Sheet: Table_legends
Supplementary File 4a-c
Viral protein	Virally expressed gene
Human gene (prey protein)	Human gene which putatively interacts with the viral protein
Supplementary File 4d
Gene	Viral prey protein which overlaps a glycaemic pathway
Gene description (STRING)	Gene description from STRING
Evidence of glycaemic involvement	Evidence for glycaemic role of gene
PMID/database	Source of evidence
Supplementary File 4e
SARS-CoV2_prey	Name of protein which interacts with a SARS-CoV2 protein
Viral protein	Name of SARS-CoV2 viral protein
Antidiabetic drug target	Gene modulated by antidiabetic
Interaction_confidence_score	STRINGv11 interaction score between antidiabetic drug target and SARS-CoV2 prey protein
Interaction_confidence_category	STRINGv11 interaction score > 0.75 = high, > 0.9 = very high
Drug/s	Antidiabetic compounds which modulate the antidiabetic drug target
Interaction_type	Type of drug-gene interaction
Supplementary File 4f
search_term	Gene searched in the DGIdb database
match_term	Gene matched in the DGIdb database
match_type	Denotes whether the match between the search term and the match term is definite
gene	The gene symbol
drug	Name of the drug which putatively interacts with the gene
Drug_interaction_types	The type of drug-gene interaction (if known)
sources	Database sources which support the drug-gene interaction
pmids	Literature evidence (PMID) which supports the drug-gene interaction

## Sheet: ST4a
Supplementary File 4a: SARS-CoV2 host-viral interactome - human genes which putatively interact with a viral SARS-CoV2 protein (Gordon et al.)
Viral protein	Human gene (Prey protein)
SARS-CoV2 E	AP3B1
SARS-CoV2 E	BRD4
SARS-CoV2 E	BRD2
SARS-CoV2 E	CWC27
SARS-CoV2 E	ZC3H18
SARS-CoV2 E	SLC44A2
SARS-CoV2 M	PMPCB
SARS-CoV2 M	YIF1A
SARS-CoV2 M	ATP1B1
SARS-CoV2 M	ACADM
SARS-CoV2 M	ETFA
SARS-CoV2 M	STOM
SARS-CoV2 M	GGCX
SARS-CoV2 M	ATP6V1A
SARS-CoV2 M	PSMD8
SARS-CoV2 M	REEP5
SARS-CoV2 M	PMPCA
SARS-CoV2 M	ANO6
SARS-CoV2 M	PITRM1
SARS-CoV2 M	SLC30A9
SARS-CoV2 M	FASTKD5
SARS-CoV2 M	SLC30A7
SARS-CoV2 M	TUBGCP3
SARS-CoV2 M	COQ8B
SARS-CoV2 M	SAAL1
SARS-CoV2 M	REEP6
SARS-CoV2 M	INTS4
SARS-CoV2 M	SLC25A21
SARS-CoV2 M	TUBGCP2
SARS-CoV2 M	TARS2
SARS-CoV2 M	RTN4
SARS-CoV2 M	FAM8A1
SARS-CoV2 M	AASS
SARS-CoV2 M	AKAP8L
SARS-CoV2 M	AAR2
SARS-CoV2 M	BZW2
SARS-CoV2 N	RRP9
SARS-CoV2 N	PABPC1
SARS-CoV2 N	CSNK2A2
SARS-CoV2 N	CSNK2B
SARS-CoV2 N	G3BP1
SARS-CoV2 N	PABPC4
SARS-CoV2 N	LARP1
SARS-CoV2 N	FAM98A
SARS-CoV2 N	SNIP1
SARS-CoV2 N	UPF1
SARS-CoV2 N	MOV10
SARS-CoV2 N	G3BP2
SARS-CoV2 N	DDX21
SARS-CoV2 N	RBM28
SARS-CoV2 N	RPL36
SARS-CoV2 Spike	GOLGA7
SARS-CoV2 Spike	ZDHHC5
SARS-CoV2 nsp1	POLA1
SARS-CoV2 nsp1	PRIM1
SARS-CoV2 nsp1	PRIM2
SARS-CoV2 nsp1	POLA2
SARS-CoV2 nsp1	COLGALT1
SARS-CoV2 nsp1	PKP2
SARS-CoV2 nsp10	AP2A2
SARS-CoV2 nsp10	GFER
SARS-CoV2 nsp10	ERGIC1
SARS-CoV2 nsp10	AP2M1
SARS-CoV2 nsp10	GRPEL1
SARS-CoV2 nsp11	TBCA
SARS-CoV2 nsp12	SBNO1
SARS-CoV2 nsp12	BCKDK
SARS-CoV2 nsp12	AKAP8
SARS-CoV2 nsp12	MYCBP2
SARS-CoV2 nsp12	SLU7
SARS-CoV2 nsp12	RIPK1
SARS-CoV2 nsp12	UBAP2L
SARS-CoV2 nsp12	TYSND1
SARS-CoV2 nsp12	PDZD11
SARS-CoV2 nsp12	PRRC2B
SARS-CoV2 nsp12	UBAP2
SARS-CoV2 nsp12	ZNF318
SARS-CoV2 nsp12	CRTC3
SARS-CoV2 nsp12	USP54
SARS-CoV2 nsp12	ZC3H7A
SARS-CoV2 nsp12	LARP4B
SARS-CoV2 nsp12	RBM41
SARS-CoV2 nsp12	TCF12
SARS-CoV2 nsp12	PPIL3
SARS-CoV2 nsp12	PLEKHA5
SARS-CoV2 nsp13	TBKBP1
SARS-CoV2 nsp13	CIT
SARS-CoV2 nsp13	HSBP1
SARS-CoV2 nsp13	PCNT
SARS-CoV2 nsp13	CEP43
SARS-CoV2 nsp13	PRKAR2A
SARS-CoV2 nsp13	PRKACA
SARS-CoV2 nsp13	PRKAR2B
SARS-CoV2 nsp13	RDX
SARS-CoV2 nsp13	CENPF
SARS-CoV2 nsp13	TLE1
SARS-CoV2 nsp13	TLE3
SARS-CoV2 nsp13	TLE5
SARS-CoV2 nsp13	GOLGA3
SARS-CoV2 nsp13	GOLGA2
SARS-CoV2 nsp13	GOLGB1
SARS-CoV2 nsp13	GRIPAP1
SARS-CoV2 nsp13	CEP350
SARS-CoV2 nsp13	PDE4DIP
SARS-CoV2 nsp13	CEP135
SARS-CoV2 nsp13	CEP68
SARS-CoV2 nsp13	CNTRL
SARS-CoV2 nsp13	ERC1
SARS-CoV2 nsp13	GCC2
SARS-CoV2 nsp13	CLIP4
SARS-CoV2 nsp13	NIN
SARS-CoV2 nsp13	CEP112
SARS-CoV2 nsp13	MIPOL1
SARS-CoV2 nsp13	USP13
SARS-CoV2 nsp13	GCC1
SARS-CoV2 nsp13	JAKMIP1
SARS-CoV2 nsp13	CDK5RAP2
SARS-CoV2 nsp13	AKAP9
SARS-CoV2 nsp13	GORASP1
SARS-CoV2 nsp13	FYCO1
SARS-CoV2 nsp13	C1orf50
SARS-CoV2 nsp13	CEP250
SARS-CoV2 nsp13	TBK1
SARS-CoV2 nsp13	HOOK1
SARS-CoV2 nsp13	NINL
SARS-CoV2 nsp14	GLA
SARS-CoV2 nsp14	IMPDH2
SARS-CoV2 nsp14	SIRT5
SARS-CoV2 nsp15	NUTF2
SARS-CoV2 nsp15	ARF6
SARS-CoV2 nsp15	RNF41
SARS-CoV2 nsp2	SLC27A2
SARS-CoV2 nsp2	EIF4E2
SARS-CoV2 nsp2	POR
SARS-CoV2 nsp2	RAP1GDS1
SARS-CoV2 nsp2	WASHC4
SARS-CoV2 nsp2	FKBP15
SARS-CoV2 nsp2	GIGYF2
SARS-CoV2 nsp4	IDE
SARS-CoV2 nsp4	TIMM10
SARS-CoV2 nsp4	ALG11
SARS-CoV2 nsp4	NUP210
SARS-CoV2 nsp4	TIMM29
SARS-CoV2 nsp4	DNAJC11
SARS-CoV2 nsp4	TIMM10B
SARS-CoV2 nsp4	TIMM9
SARS-CoV2 nsp5	HDAC2
SARS-CoV2 nsp5_C145A	GPX1
SARS-CoV2 nsp5_C145A	TRMT1
SARS-CoV2 nsp6	ATP5MG
SARS-CoV2 nsp6	ATP6AP1
SARS-CoV2 nsp6	SIGMAR1
SARS-CoV2 nsp6	ATP13A3
SARS-CoV2 nsp7	AGPS
SARS-CoV2 nsp7	CYB5B
SARS-CoV2 nsp7	ACSL3
SARS-CoV2 nsp7	CYB5R3
SARS-CoV2 nsp7	RALA
SARS-CoV2 nsp7	COMT
SARS-CoV2 nsp7	RAB5C
SARS-CoV2 nsp7	RAB7A
SARS-CoV2 nsp7	RAB8A
SARS-CoV2 nsp7	RAB2A
SARS-CoV2 nsp7	RAB10
SARS-CoV2 nsp7	RAB14
SARS-CoV2 nsp7	RHOA
SARS-CoV2 nsp7	RAB1A
SARS-CoV2 nsp7	GNB1
SARS-CoV2 nsp7	GNG5
SARS-CoV2 nsp7	LMAN2
SARS-CoV2 nsp7	MOGS
SARS-CoV2 nsp7	TOR1AIP1
SARS-CoV2 nsp7	MTARC1
SARS-CoV2 nsp7	QSOX2
SARS-CoV2 nsp7	HS2ST1
SARS-CoV2 nsp7	NDUFAF2
SARS-CoV2 nsp7	SCCPDH
SARS-CoV2 nsp7	SCARB1
SARS-CoV2 nsp7	NAT14
SARS-CoV2 nsp7	DCAKD
SARS-CoV2 nsp7	FAM162A
SARS-CoV2 nsp7	DNAJC19
SARS-CoV2 nsp7	SELENOS
SARS-CoV2 nsp7	PTGES2
SARS-CoV2 nsp7	RAB18
SARS-CoV2 nsp8	MPHOSPH10
SARS-CoV2 nsp8	SRP72
SARS-CoV2 nsp8	ATE1
SARS-CoV2 nsp8	NSD2
SARS-CoV2 nsp8	SRP19
SARS-CoV2 nsp8	SRP54
SARS-CoV2 nsp8	MRPS25
SARS-CoV2 nsp8	DDX10
SARS-CoV2 nsp8	LARP7
SARS-CoV2 nsp8	MEPCE
SARS-CoV2 nsp8	NGDN
SARS-CoV2 nsp8	EXOSC8
SARS-CoV2 nsp8	NARS2
SARS-CoV2 nsp8	NOL10
SARS-CoV2 nsp8	CCDC86
SARS-CoV2 nsp8	SEPSECS
SARS-CoV2 nsp8	EXOSC5
SARS-CoV2 nsp8	EXOSC3
SARS-CoV2 nsp8	AATF
SARS-CoV2 nsp8	HECTD1
SARS-CoV2 nsp8	MRPS2
SARS-CoV2 nsp8	MRPS5
SARS-CoV2 nsp8	EXOSC2
SARS-CoV2 nsp8	MRPS27
SARS-CoV2 nsp9	GTF2F2
SARS-CoV2 nsp9	FBN1
SARS-CoV2 nsp9	FBN2
SARS-CoV2 nsp9	NUP214
SARS-CoV2 nsp9	NUP62
SARS-CoV2 nsp9	DCAF7
SARS-CoV2 nsp9	EIF4H
SARS-CoV2 nsp9	NUP54
SARS-CoV2 nsp9	MIB1
SARS-CoV2 nsp9	SPART
SARS-CoV2 nsp9	NEK9
SARS-CoV2 nsp9	ZNF503
SARS-CoV2 nsp9	NUP88
SARS-CoV2 nsp9	NUP58
SARS-CoV2 nsp9	MAT2B
SARS-CoV2 nsp9	FBLN5
SARS-CoV2 orf10	PPT1
SARS-CoV2 orf10	CUL2
SARS-CoV2 orf10	MAP7D1
SARS-CoV2 orf10	THTPA
SARS-CoV2 orf10	ZYG11B
SARS-CoV2 orf10	TIMM8B
SARS-CoV2 orf10	RBX1
SARS-CoV2 orf10	ELOC
SARS-CoV2 orf10	ELOB
SARS-CoV2 orf3a	HMOX1
SARS-CoV2 orf3a	TRIM59
SARS-CoV2 orf3a	ARL6IP6
SARS-CoV2 orf3a	VPS39
SARS-CoV2 orf3a	CLCC1
SARS-CoV2 orf3a	VPS11
SARS-CoV2 orf3a	SUN2
SARS-CoV2 orf3a	ALG5
SARS-CoV2 orf3b	STOML2
SARS-CoV2 orf6	NUP98
SARS-CoV2 orf6	RAE1
SARS-CoV2 orf6	MTCH1
SARS-CoV2 orf7a	HEATR3
SARS-CoV2 orf7a	MDN1
SARS-CoV2 orf8	PLOD2
SARS-CoV2 orf8	TOR1A
SARS-CoV2 orf8	STC2
SARS-CoV2 orf8	PLAT
SARS-CoV2 orf8	ITGB1
SARS-CoV2 orf8	CISD3
SARS-CoV2 orf8	COL6A1
SARS-CoV2 orf8	PVR
SARS-CoV2 orf8	DNMT1
SARS-CoV2 orf8	LOX
SARS-CoV2 orf8	PCSK6
SARS-CoV2 orf8	INHBE
SARS-CoV2 orf8	NPC2
SARS-CoV2 orf8	MFGE8
SARS-CoV2 orf8	OS9
SARS-CoV2 orf8	NPTX1
SARS-CoV2 orf8	POGLUT2
SARS-CoV2 orf8	POGLUT3
SARS-CoV2 orf8	ERO1B
SARS-CoV2 orf8	PLD3
SARS-CoV2 orf8	FOXRED2
SARS-CoV2 orf8	CHPF
SARS-CoV2 orf8	PUSL1
SARS-CoV2 orf8	EMC1
SARS-CoV2 orf8	GGH
SARS-CoV2 orf8	ERLEC1
SARS-CoV2 orf8	IL17RA
SARS-CoV2 orf8	NGLY1
SARS-CoV2 orf8	HS6ST2
SARS-CoV2 orf8	SDF2
SARS-CoV2 orf8	NEU1
SARS-CoV2 orf8	GDF15
SARS-CoV2 orf8	TM2D3
SARS-CoV2 orf8	ERP44
SARS-CoV2 orf8	EDEM3
SARS-CoV2 orf8	SIL1
SARS-CoV2 orf8	POFUT1
SARS-CoV2 orf8	SMOC1
SARS-CoV2 orf8	PLEKHF2
SARS-CoV2 orf8	FBXL12
SARS-CoV2 orf8	UGGT2
SARS-CoV2 orf8	CHPF2
SARS-CoV2 orf8	ADAMTS1
SARS-CoV2 orf8	HYOU1
SARS-CoV2 orf8	FKBP7
SARS-CoV2 orf8	ADAM9
SARS-CoV2 orf8	FKBP10
SARS-CoV2 orf9b	SLC9A3R1
SARS-CoV2 orf9b	CHMP2A
SARS-CoV2 orf9b	CSDE1
SARS-CoV2 orf9b	TOMM70
SARS-CoV2 orf9b	MARK3
SARS-CoV2 orf9b	MARK2
SARS-CoV2 orf9b	DPH5
SARS-CoV2 orf9b	DCTPP1
SARS-CoV2 orf9b	MARK1
SARS-CoV2 orf9b	PTBP2
SARS-CoV2 orf9b	BAG5
SARS-CoV2 orf9c	UBXN8
SARS-CoV2 orf9c	GPAA1
SARS-CoV2 orf9c	WFS1
SARS-CoV2 orf9c	ABCC1
SARS-CoV2 orf9c	F2RL1
SARS-CoV2 orf9c	SCAP
SARS-CoV2 orf9c	DPY19L1
SARS-CoV2 orf9c	TMEM97
SARS-CoV2 orf9c	SLC30A6
SARS-CoV2 orf9c	TAPT1
SARS-CoV2 orf9c	ERMP1
SARS-CoV2 orf9c	NLRX1
SARS-CoV2 orf9c	RETREG3
SARS-CoV2 orf9c	PIGO
SARS-CoV2 orf9c	FAR2
SARS-CoV2 orf9c	ECSIT
SARS-CoV2 orf9c	ALG8
SARS-CoV2 orf9c	TMEM39B
SARS-CoV2 orf9c	GHITM
SARS-CoV2 orf9c	ACAD9
SARS-CoV2 orf9c	NDFIP2
SARS-CoV2 orf9c	BCS1L
SARS-CoV2 orf9c	NDUFAF1
SARS-CoV2 orf9c	TMED5
SARS-CoV2 orf9c	NDUFB9
SARS-CoV2 orf9c	PIGS

## Sheet: ST4b
Supplementary File 4b: Influenza host-viral interactome - human genes which putatively interact with a viral influenza protein (Watanabe et al, top 91 interacting proteins)
Viral protein/s	Human gene (Prey protein)
NA	ANP32B
NP, M1	AP2A2
PA,PB1,NP,NA,M1,M2	ASCC3L1
NA,M1,M2	ATP5O
PB2,PA,PB1,M1,M2,PB1-F2	BAG3
NA,HA	BASP1
M1	BRD8
NP,NA,M1	BUB3
M2	C14orf173
NA,M2	C19orf43
PB2,PB1,NP,NA,M1	CAPRIN1
NS1	CCDC135
M1	CCDC56
PA,PB1,NP,NA,M1	CHERP
NP	CIRBP
NP,NA,M1,M2,HA	CLTC
M2	CNOT1
M1	CTNNB1
M1	CYC1
PB2,PA,PB1,NP,NA,M1	DDX21
NP,NA	DDX55
NA	DKFZp564K142
M1	DNAJC11
M2	DPM3
NP,NA,M1	EEF1A2
PB2,PA,NP,NA,M1,M2,HA	EEF2
M2	FAM73B
NP,NA	FLJ20303
M2	GBF1
M2	GEMIN4
PB2,PA,PB1,NP,NA,M1,NS1,PB1-F2,HA	HNRNPK
NP,NA,M1,M2	IARS
PB2,PB1,NP,NA,M1,HA	IGF2BP2
NA,HA	ITGA3
NP	ITGB4BP
M2	ITM2B
PB2,PA,NA,M1,M2,HA	JAK1
PB2	KIAA0664
NP,NA	KRT14
NP,NA,M1,M2	LRPPRC
M2	MRCL3
NA	MYH10
M2	NCAPD3
M1	NCLN
M2	NDUFA10
M1	NDUFS8
PB2	NFIA
NA, M2	NIBP
M2	NUP160
M2	NUP205
PB2	PCDHB12
NA,M1,HA	PHB
PB2,PB1,M1,M2	PPP6C
PB2,PA,NP,NA,M1,M2,HA	PSMA4
M1	PSMA5
M1	PSMB2
PB2,PA,PB1,NA,M1,HA	PSMC1
PB2,PA,PB1,NA,M1,M2,HA	PSMC4
PB2,PA,PB1,NP,NA,M1,M2,HA	PSMC6
PB2,PA,PB1,NA,M1,M2	PSMD11
PB2,PA,PB1,NP,NA,M1,M2,HA	PSMD12
PB2,PA,NP,NA,M1,M2,HA	PSMD13
PB2,PA,PB1,NA,M1,M2,HA	PSMD14
PB2,PA,PB1,NP,NA,M1,M2,PB1-F2,HA	PSMD2
PB2,PA,PB1,M1,M2,HA	PSMD6
PB2, M1, HA	RCN1
PB2,PA,PB1,NP,NA,M1,NS1,HA	RPL26
M2	S100A4
PB2,PA,PB1,NP,NA,M1,M2,NS2,PB1-F2,HA	SAMHD1
NA	SDF2L1
PB2,M1	SDF4
NP,NA	SF3A2
PB2,PA,PB1,NP,NA,M1,NS1,HA	SF3B2
PB2,PA,PB1,NP,NA,M1	SF3B4
PA,PB1,NP,NS1	SFRS10
HA	SFRS2B
PA,PB1,NP,NA,M1,HA	SNRP70
PB1,NP,NA,M1	SNRPC
PB2,PA,NP,NA,M1	SNRPD3
NA,M2	SQSTM1
PB2,PA,PB1,NP,NA,M1,NS2,PB1-F2,HA	STK38
HA	TAF15
NP	TESC
NP,M2	THOC2
PA,M1,M2	TOMM40
PB2,PB1,NP,NA,M1,HA	TRIM28
NA	UAP1
PB2,M2	USP9X
PA,PB1,NP,NA,M1,HA	VCP
M2	XPO1
NA,M1	ZC3H15

## Sheet: ST4c
Supplementary File 4c: Human adenovirus host-viral interactome - human genes which putatively interact with a viral adenovirus protein (Martinez-Martin et al)
Viral protein/s	Human gene (Prey protein)
D47 CR1beta	CD300C
D47 CR1beta	CD300A
D28 CR1beta	NELL2
D28 CR1beta	CST3
D28 CR1beta	IGDCC3
D9 CR1beta, D53 CR1beta, D47 CR1beta, D23 CR1beta, D58 CR1beta, D28 CR1beta, D51 CR1beta, D39 CR1beta, D30 CR1beta, D24 CR1beta, D43 CR1beta, D19a CR1beta	PTPRC
D43 CR1beta, D30 CR1beta, D39 CR1beta, D51 CR1beta, D28 CR1beta	LILRB1
A18 CR1alpha	IL22
A18 CR1alpha	CD84
A18 CR1alpha, B55 CR1beta	SLAMF6
A18 CR1alpha, B3 CR1gamma	SLAMF7
D30 CR1beta	MPZL1
D30 CR1beta	IL11
D30 CR1beta	DEFA3
D30 CR1beta, B3 CR1gamma	LY9
B3 CR1gamma	SLAMF1
F41 CR1beta, A18 CR1beta, B3 CR1gamma	CD244
D43 CR1beta	EPHA8
F41 CR1beta	LAIR1
F41 CR1beta	HAVCR2
D43 CR1beta	EPHA6
F41 CR1beta, D28 CR1alpha, D37 CR1beta, D24 CR1beta	LILRB2
D37 CR1beta, D19aCR1beta	ISLR2
B3 CR1gamma	SLAMF8

## Sheet: ST4d
Supplementary File 4d: SARS-CoV2 viral prey proteins which overlap a glycaemic gene ontology pathway
Gene	Gene description (STRING)	Evidence of glycaemic involvement	PMID/database
ACSL3	Long-chain-fatty-acid--CoA ligase 3; Acyl-CoA synthetases (ACSL) activates long-chain fatty acids for both synthesis of cellular lipids, and degradation via beta-oxidation. ACSL3 mediates hepatic lipogenesis (By similarity). Preferentially uses myristate, laurate, arachidonate and eicosapentaenoate as substrates (By similarity). Has mainly an anabolic role in energy metabolism. Required for the i…	ASCL3 knock-down experimentally shown to downregulate glucose-stimulated insulin secretion and is important for homeostatic insulin signalling. ACSL3 knock-down suppresses ChREBP under high glucose conditons, which is a glucose-response TF which regulates the expression of glycolytic and lipogenic genes.	28193492, 19737935
GNB1	Guanine nucleotide-binding protein G(I)/G(S)/G(T) subunit beta-1; Guanine nucleotide-binding proteins (G proteins) are involved as a modulator or transducer in various transmembrane signaling systems. The beta and gamma chains are required for the GTPase activity, for replacement of GDP by GTP, and for G protein- effector interaction	Predicted to interact with glucagon-like peptide-1 (GLP-!R) (catalysis and reaction). Combined score = 0.99. heterotrimeric G proteins are involved in several regulatory pathways influencing glucose-stimulated insulin secretion	STRING v11.0
GNG5	Guanine nucleotide-binding protein G(I)/G(S)/G(O) subunit gamma-5; Guanine nucleotide-binding proteins (G proteins) are involved as a modulator or transducer in various transmembrane signaling systems. The beta and gamma chains are required for the GTPase activity, for replacement of GDP by GTP, and for G protein- effector interaction	Predicted to interact with glucagon-like peptide-1 (GLP-!R) (catalysis and reaction). Combined score = 0.99. This gene was negatively correlated with insulin secretion/higher HbA1c in a expression study of pancreatic islet microarrays. Heterotrimeric G proteins are involved in several regulatory pathways influencing glucose-stimulated insulin secretion	STRING v11.0, 25489054
NUP210	Nuclear pore membrane glycoprotein 210; Nucleoporin essential for nuclear pore assembly and fusion, nuclear pore spacing, as well as structural integrity; Nucleoporins	The nucleoporin complex transports glucokinase and glucokinase regulatory protein from the cytosol to nucleoplasm. Evidence of physical interaction with GCKR.	STRING v11.0, 10601273
NUP214	Nuclear pore complex protein Nup214; May serve as a docking site in the receptor-mediated import of substrates across the nuclear pore complex; Nucleoporin	The nucleoporin complex transports glucokinase and glucokinase regulatory protein from the cytosol to nucleoplasm. Evidence of physical interaction with GCKR.	STRING v11.0, 10601273
NUP54	Nucleoporin p54; Component of the nuclear pore complex, a complex required for the trafficking across the nuclear membrane; Nucleoporins	The nucleoporin complex transports glucokinase and glucokinase regulatory protein from the cytosol to nucleoplasm. Evidence of physical interaction with GCKR.	STRING v11.0, 10601273
NUP62	Nuclear pore glycoprotein p62; Essential component of the nuclear pore complex. The N-terminal is probably involved in nucleocytoplasmic transport. The C-terminal is involved in protein-protein interaction probably via coiled-coil formation, promotes its association with centrosomes and may function in anchorage of p62 to the pore complex. Plays a role in mitotic cell cycle progression by regulat…	The nucleoporin complex transports glucokinase and glucokinase regulatory protein from the cytosol to nucleoplasm. Evidence of physical interaction with GCKR.	STRING v11.0, 10601273
NUP88	Nuclear pore complex protein Nup88; Essential component of nuclear pore complex; Nucleoporins	The nucleoporin complex transports glucokinase and glucokinase regulatory protein from the cytosol to nucleoplasm. Evidence of physical interaction with GCKR.	STRING v11.0, 10601273
NUP98	Nuclear pore complex protein Nup98-Nup96; Plays a role in the nuclear pore complex (NPC) assembly and/or maintenance. NUP98 and NUP96 are involved in the bidirectional transport across the NPC. May anchor NUP153 and TPR to the NPC. In cooperation with DHX9, plays a role in transcription and alternative splicing activation of a subset of genes. Involved in the localization of DHX9 in discrete intr…	The nucleoporin complex transports glucokinase and glucokinase regulatory protein from the cytosol to nucleoplasm. Evidence of physical interaction witn GCKR.	STRING v11.0, 10601273
NUPL1	Nucleoporin p58/p45; Component of the nuclear pore complex, a complex required for the trafficking across the nuclear membrane; Belongs to the NUP58 family	The nucleoporin complex transports glucokinase and glucokinase regulatory protein from the cytosol to nucleoplasm.	STRING v11.0
PRKACA	cAMP-dependent protein kinase catalytic subunit alpha; Phosphorylates a large number of substrates in the cytoplasm and the nucleus. Regulates the abundance of compartmentalized pools of its regulatory subunits through phosphorylation of PJA2 which binds and ubiquitinates these subunits, leading to their subsequent proteolysis. Phosphorylates CDC25B, ABL1, NFKB1, CLDN3, PSMC5/RPT6, PJA2, RYR2, RO…	Activated PKA (protein kinase A) phosphorylates serine 36 of the bifunctional 6-Phosphofructo-2-kinase /Fructose-2,6-bisphosphatase (PFKFB1) enzyme. This phosphorylation inhibits the enzyme's phosphofructokinase (PFK-2) activity while activating its phosphatase activity. As a result, cytosolic levels of Fructose-2,6-bisphosphate (F-2,6-P2) are reduced. F-2,6-P2 in turn is a key positive regulator…	REACTOME, 22940692, 16183914, 9405718
PRKAR2A	cAMP-dependent protein kinase type II-alpha regulatory subunit; Regulatory subunit of the cAMP-dependent protein kinases involved in cAMP signaling in cells. Type II regulatory chains mediate membrane association by binding to anchoring proteins, including the MAP2 kinase	PKA phosphorylation has a known role in glycaemia. The inactive Protein Kinase A (PKA) complex contains 2 regulatory subunits and 2 catalytic subunits. Binding of the regulatory subunits to the catalytic subunits maintains inactivity. In humans there are 3 different catalytic subunits and 4 different regulatory subunits. The particular subunits present in the beta cells of the pancreas are unknow…	REACTOME, 22940692, 16183914, 9405718, 12938160
PRKAR2B	cAMP-dependent protein kinase type II-beta regulatory subunit; Regulatory subunit of the cAMP-dependent protein kinases involved in cAMP signaling in cells. Type II regulatory chains mediate membrane association by binding to anchoring proteins, including the MAP2 kinase	PKA phosphorylation has a known role in glycaemia. The inactive Protein Kinase A (PKA) complex contains 2 regulatory subunits and 2 catalytic subunits. Binding of the regulatory subunits to the catalytic subunits maintains inactivity. In humans there are 3 different catalytic subunits and 4 different regulatory subunits. The particular subunits present in the beta cells of the pancreas are unknow…	REACTOME, 22940692, 16183914, 9405718, 12938160
RAE1	mRNA export factor; Plays a role in mitotic bipolar spindle formation. Binds mRNA. May function in nucleocytoplasmic transport and in directly or indirectly attaching cytoplasmic mRNPs to the cytoskeleton; Belongs to the WD repeat rae1 family	Complexes with the nucleoporins described above, also has high confidence physical interaction with GCKR.	STRING v11.0

## Sheet: ST4e
Supplementary File 4e: SARS-CoV2 viral prey proteins overlapping glycaemic pathways that demonstrate a high-confidence interaction with an antidiabetic drug target
SARS-CoV2-prey	Viral protein	Antidiabetic drug target	Interaction_confidence_score	Interaction_confidence_category	Drug/s	Drug_interaction_type
ACSL3	SARS-CoV2 nsp7	ACSL4	0.758	High	TROGLITAZONE	Inhibitor
ACSL3	SARS-CoV2 nsp7	LPL	0.838	High	ACARBOSE	N/A
GNB1	SARS-CoV2 nsp7	GLP1R	0.984	Very high	EXENATIDE, LIRAGLUTIDE, LIXISENATIDE, ALBIGLUTIDE, DULAGLUTIDE	agonist
GNB1	SARS-CoV2 nsp7	CALCR	0.982	Very high	PRAMLINTIDE	agonist
GNB1	SARS-CoV2 nsp7	PIK3CG	0.958	Very high	TROGLITAZONE	N/A
GNB1	SARS-CoV2 nsp7	PIK3CA	0.948	Very high	METFORMIN	N/A
GNB1	SARS-CoV2 nsp7	HRAS	0.938	Very high	METFORMIN	N/A
GNB1	SARS-CoV2 nsp7	PIK3CB	0.937	Very high	TROGLITAZONE	N/A
GNB1	SARS-CoV2 nsp7	AGTR2	0.915	Very high	ROSIGLITAZONE	N/A
GNB1	SARS-CoV2 nsp7	NPY	0.903	Very high	ROSIGLITAZONE	N/A
GNB1	SARS-CoV2 nsp7	CXCL8	0.902	Very high	TROGLITAZONE	N/A
GNB1	SARS-CoV2 nsp7	CRH	0.901	Very high	ROSIGLITAZONE	N/A
GNB1	SARS-CoV2 nsp7	RAMP2	0.9	Very high	PRAMLINTIDE	agonist
GNB1	SARS-CoV2 nsp7	RAMP3	0.9	Very high	PRAMLINTIDE	agonist
GNB1	SARS-CoV2 nsp7	MAP2K3	0.9	Very high	ROSIGLITAZONE	N/A
GNB1	SARS-CoV2 nsp7	RAMP1	0.9	Very high	PRAMLINTIDE	agonist
GNB1	SARS-CoV2 nsp7	KRAS	0.773	High	PHENFORMIN	N/A
GNG5	SARS-CoV2 nsp7	CALCR	0.913	Very high	ROSIGLITAZONE	N/A
GNG5	SARS-CoV2 nsp7	PIK3CG	0.903	Very high	TROGLITAZONE	N/A
GNG5	SARS-CoV2 nsp7	CRH	0.901	Very high	ROSIGLITAZONE	N/A
GNG5	SARS-CoV2 nsp7	CXCL8	0.9	Very high	TROGLITAZONE	N/A
GNG5	SARS-CoV2 nsp7	RAMP3	0.9	Very high	PRAMLINTIDE	agonist
GNG5	SARS-CoV2 nsp7	RAMP1	0.9	Very high	PRAMLINTIDE	agonist
GNG5	SARS-CoV2 nsp7	RAMP2	0.9	Very high	PRAMLINTIDE	agonist
GNG5	SARS-CoV2 nsp7	PIK3CA	0.9	Very high	METFORMIN	N/A
NUP210	SARS-CoV2 nsp9	HSPA4	0.915	Very high	PIOGLITAZONE	N/A
NUP62	SARS-CoV2 nsp9	HSPA4	0.944	Very high	PIOGLITAZONE	N/A
NUP88	SARS-CoV2 nsp9	HSPA4	0.915	Very high	PIOGLITAZONE	N/A
PRKACA	SARS-CoV2 nsp13	ABCC8	0.902	Very high	ACETOHEXAMIDE, CHLORPROPAMIDE,TOLBUTAMIDE,TOLAZAMIDE,GLIPIZIDE,GLIQUIDONE,GLICLAZIDE,GLIMEPIRIDE,GLYMIDINE,REPAGLINIDE,NATEGLINIDEMITIGLINIDE	Inhibitor or blocker (except GLYMIDINE which is an inducer)
PRKACA	SARS-CoV2 nsp13	ERBB2	0.902	Very high	METFORMIN	N/A
RAE1	SARS-CoV2 orf6	HSPA4	0.916	Very high	PIOGLITAZONE	N/A

## Sheet: ST4f
Supplementary Table 4f: List of putative antidiabetic compound target genes (DGIdb)
search_term	match_term	match_type	gene	drug	interaction_types	sources	pmids	High_quality (>= 2 lines of evidence)
PRAMLINTIDE	PRAMLINTIDE	Definite	ABCB4	PRAMLINTIDE	agonist	GuideToPharmacologyInteractions		No
ACETOHEXAMIDE	ACETOHEXAMIDE	Definite	ABCC8	ACETOHEXAMIDE	blocker	ChemblInteractions		No
CHLORPROPAMIDE	CHLORPROPAMIDE	Definite	ABCC8	CHLORPROPAMIDE	inhibitor|blocker	ChemblInteractions|DrugBank	18220763	Yes
TOLBUTAMIDE	TOLBUTAMIDE	Definite	ABCC8	TOLBUTAMIDE	inhibitor|blocker	ChemblInteractions|DrugBank	18220763	Yes
TOLAZAMIDE	TOLAZAMIDE	Definite	ABCC8	TOLAZAMIDE	blocker	ChemblInteractions|DrugBank	8799949|10354277	Yes
GLIPIZIDE	GLIPIZIDE	Definite	ABCC8	GLIPIZIDE	inhibitor|blocker	ChemblInteractions|DrugBank	11484080|11574406|11078468|11078469|12475777	Yes
GLIQUIDONE	GLIQUIDONE	Definite	ABCC8	GLIQUIDONE	inhibitor	DrugBank	11484080|11574406|11078468|11078469|12475777	Yes
GLICLAZIDE	GLICLAZIDE	Definite	ABCC8	GLICLAZIDE	binder	DrugBank	11484080|11574406|11078468|11078469|12475777	Yes
GLIMEPIRIDE	GLIMEPIRIDE	Definite	ABCC8	GLIMEPIRIDE	inducer|blocker	TdgClinicalTrial|ChemblInteractions|DrugBank	8911984|8172912|8529521	Yes
GLYMIDINE	GLYMIDINE	Definite	ABCC8	GLYMIDINE	inducer	DrugBank	12213829|12213059|12031979|9990013|12107069|12145099	Yes
REPAGLINIDE	REPAGLINIDE	Definite	ABCC8	REPAGLINIDE	inhibitor|blocker	TdgClinicalTrial|ChemblInteractions|DrugBank	15219283|11716850|10773014|15380228|12196472|11728565	Yes
NATEGLINIDE	NATEGLINIDE	Definite	ABCC8	NATEGLINIDE	inhibitor|blocker	TdgClinicalTrial|ChemblInteractions|DrugBank	11716850|10773014|12604678|12196472|11728565|12764427	Yes
MITIGLINIDE	MITIGLINIDE	Definite	ABCC8	MITIGLINIDE	inhibitor	TdgClinicalTrial|DrugBank	11716850|17003348|17592198	Yes
METFORMIN	METFORMIN	Definite	ACACB	METFORMIN	activator	TTD		No
TROGLITAZONE	TROGLITAZONE	Definite	ACSL4	TROGLITAZONE	inhibitor	DrugBank	12147264|11319232|11319222	Yes
ROSIGLITAZONE	ROSIGLITAZONE	Definite	ACSL4	ROSIGLITAZONE	inhibitor	DrugBank	17259370	Yes
ROSIGLITAZONE	ROSIGLITAZONE	Definite	AGTR2	ROSIGLITAZONE		NCI	16891009	Yes
ACARBOSE	ACARBOSE	Definite	AMY2A	ACARBOSE	inhibitor	TdgClinicalTrial|ChemblInteractions|TEND|DrugBank	12890998	Yes
TROGLITAZONE	TROGLITAZONE	Definite	APOE	TROGLITAZONE		NCI	15057551	Yes
TROGLITAZONE	TROGLITAZONE	Definite	BDNF	TROGLITAZONE		NCI	17924870	Yes
METFORMIN	METFORMIN	Definite	BRCA1	METFORMIN		CKB	26546619	Yes
METFORMIN	METFORMIN	Definite	BRCA2	METFORMIN		CKB	26546619	Yes
PRAMLINTIDE	PRAMLINTIDE	Definite	CALCR	PRAMLINTIDE	agonist	TdgClinicalTrial|DrugBank	15494035|18593822|11772274|20357016|20015292|19273748	Yes
GLIMEPIRIDE	GLIMEPIRIDE	Definite	CCKAR	GLIMEPIRIDE	antagonist	GuideToPharmacologyInteractions		No
TROGLITAZONE	TROGLITAZONE	Definite	CCND1	TROGLITAZONE		NCI	14764597	Yes
ROSIGLITAZONE	ROSIGLITAZONE	Definite	CD40LG	ROSIGLITAZONE		NCI	12695287	Yes
ROSIGLITAZONE	ROSIGLITAZONE	Definite	CRH	ROSIGLITAZONE		NCI	15279069	Yes
TROGLITAZONE	TROGLITAZONE	Definite	CXCL8	TROGLITAZONE		NCI	12364456	Yes
TOLBUTAMIDE	TOLBUTAMIDE	Definite	CYP2C19	TOLBUTAMIDE		PharmGKB		No
REPAGLINIDE	REPAGLINIDE	Definite	CYP2C8	REPAGLINIDE		PharmGKB		No
GLIPIZIDE	GLIPIZIDE	Definite	CYP2C9	GLIPIZIDE		PharmGKB		No
NATEGLINIDE	NATEGLINIDE	Definite	CYP3A4	NATEGLINIDE		PharmGKB		No
PIOGLITAZONE	PIOGLITAZONE	Definite	CYP3A4	PIOGLITAZONE		NCI	16447051	Yes
NATEGLINIDE	NATEGLINIDE	Definite	CYP3A5	NATEGLINIDE		PharmGKB		No
SITAGLIPTIN	SITAGLIPTIN	Definite	DPP4	SITAGLIPTIN	inhibitor	TdgClinicalTrial|GuideToPharmacologyInteractions|TEND		Yes
VILDAGLIPTIN	VILDAGLIPTIN	Definite	DPP4	VILDAGLIPTIN	inhibitor	TdgClinicalTrial|GuideToPharmacologyInteractions|ChemblInteractions|DrugBank|TTD	8100523|15562200|19149538	Yes
SAXAGLIPTIN	SAXAGLIPTIN	Definite	DPP4	SAXAGLIPTIN	inhibitor	TdgClinicalTrial|GuideToPharmacologyInteractions|TEND|DrugBank|TTD	16033281|10592235	Yes
ALOGLIPTIN	ALOGLIPTIN	Definite	DPP4	ALOGLIPTIN	inhibitor	TdgClinicalTrial|GuideToPharmacologyInteractions|DrugBank|TTD		Yes
LINAGLIPTIN	LINAGLIPTIN	Definite	DPP4	LINAGLIPTIN	inhibitor	GuideToPharmacologyInteractions|ChemblInteractions|DrugBank|TTD	22149370	Yes
ACARBOSE	ACARBOSE	Definite	DRD2	ACARBOSE	antagonist	TTD		No
METFORMIN	METFORMIN	Definite	ERBB2	METFORMIN		CKB	28375706	Yes
TROGLITAZONE	TROGLITAZONE	Definite	ESRRA	TROGLITAZONE	inverse agonist	DrugBank	20298676	Yes
TROGLITAZONE	TROGLITAZONE	Definite	ESRRG	TROGLITAZONE	inverse agonist	DrugBank	20298676	Yes
ROSIGLITAZONE	ROSIGLITAZONE	Definite	FFAR1	ROSIGLITAZONE	agonist	GuideToPharmacologyInteractions		No
CHLORPROPAMIDE	CHLORPROPAMIDE	Definite	G6PD	CHLORPROPAMIDE		FDA		No
GLIPIZIDE	GLIPIZIDE	Definite	G6PD	GLIPIZIDE		FDA		No
GLIMEPIRIDE	GLIMEPIRIDE	Definite	G6PD	GLIMEPIRIDE		FDA		No
ACARBOSE	ACARBOSE	Definite	GAA	ACARBOSE	inhibitor	TdgClinicalTrial|TEND|DrugBank|TTD	11404235|3467980|15292070|1594557|3539207|16702880|11752352|16763908	Yes
MIGLITOL	MIGLITOL	Definite	GAA	MIGLITOL	antagonist|inhibitor	GuideToPharmacologyInteractions|ChemblInteractions|DrugBank	19085811|19818342	Yes
TROGLITAZONE	TROGLITAZONE	Definite	GADD45A	TROGLITAZONE		NCI	15064713	Yes
MIGLITOL	MIGLITOL	Definite	GANAB	MIGLITOL	antagonist	DrugBank	19085811|19818342	Yes
MIGLITOL	MIGLITOL	Definite	GANC	MIGLITOL	antagonist	DrugBank	19085811|19818342	Yes
PIOGLITAZONE	PIOGLITAZONE	Definite	GFAP	PIOGLITAZONE		NCI	15649489	Yes
PIOGLITAZONE	PIOGLITAZONE	Definite	GHRL	PIOGLITAZONE		NCI	16682836	Yes
SEMAGLUTIDE	SEMAGLUTIDE	Definite	GLP1R	SEMAGLUTIDE	agonist	ChemblInteractions		No
EXENATIDE	EXENATIDE	Definite	GLP1R	EXENATIDE	agonist|binder	TdgClinicalTrial|ChemblInteractions|TEND|DrugBank|TTD	16627399|16722815|17292977|15700891|20649595|16341288|11752352|15495988|17353295|16534527|15331551|17379930	Yes
LIRAGLUTIDE	LIRAGLUTIDE	Definite	GLP1R	LIRAGLUTIDE	agonist	TdgClinicalTrial|GuideToPharmacologyInteractions|ChemblInteractions|TEND|DrugBank|TTD	14678021|18333889	Yes
LIXISENATIDE	LIXISENATIDE	Definite	GLP1R	LIXISENATIDE	agonist	GuideToPharmacologyInteractions|ChemblInteractions		Yes
ALBIGLUTIDE	ALBIGLUTIDE	Definite	GLP1R	ALBIGLUTIDE	agonist	TdgClinicalTrial|ChemblInteractions|DrugBank	25136065	Yes
DULAGLUTIDE	DULAGLUTIDE	Definite	GLP1R	DULAGLUTIDE	agonist	ChemblInteractions|DrugBank	25367716	Yes
TROGLITAZONE	TROGLITAZONE	Definite	GSTM1	TROGLITAZONE		NCI	12732844	Yes
ROSIGLITAZONE	ROSIGLITAZONE	Definite	HNF4A	ROSIGLITAZONE		NCI	15998575	Yes
METFORMIN	METFORMIN	Definite	HRAS	METFORMIN		CKB	26921394|26951660	Yes
PIOGLITAZONE	PIOGLITAZONE	Definite	HSPA4	PIOGLITAZONE		NCI	12871756	Yes
METFORMIN	METFORMIN	Definite	IDH1	METFORMIN		CKB	26363012	Yes
GLYMIDINE	GLYMIDINE	Definite	IDO1	GLYMIDINE	inhibitor	GuideToPharmacologyInteractions		No
INSULIN LISPRO	INSULIN LISPRO	Definite	INSR	INSULIN LISPRO	agonist|binder	ChemblInteractions|TTD		Yes
INSULIN ASPART	INSULIN ASPART	Definite	INSR	INSULIN ASPART	agonist|binder	TdgClinicalTrial|ChemblInteractions|TTD		Yes
INSULIN GLULISINE	INSULIN GLULISINE	Definite	INSR	INSULIN GLULISINE	agonist|binder	TdgClinicalTrial|ChemblInteractions|DrugBank|TTD	20424816|11752352	Yes
GLIMEPIRIDE	GLIMEPIRIDE	Definite	IRS1	GLIMEPIRIDE		NCI	15710354	Yes
REPAGLINIDE	REPAGLINIDE	Definite	KCNJ1	REPAGLINIDE		TEND		No
NATEGLINIDE	NATEGLINIDE	Definite	KCNJ1	NATEGLINIDE		TEND		No
CHLORPROPAMIDE	CHLORPROPAMIDE	Definite	KCNJ1	CHLORPROPAMIDE		TdgClinicalTrial|TEND		Yes
TOLBUTAMIDE	TOLBUTAMIDE	Definite	KCNJ1	TOLBUTAMIDE	inhibitor	TdgClinicalTrial|TEND|DrugBank	10455193|9647478|11226127	Yes
TOLAZAMIDE	TOLAZAMIDE	Definite	KCNJ1	TOLAZAMIDE		TdgClinicalTrial|TEND		Yes
GLIPIZIDE	GLIPIZIDE	Definite	KCNJ1	GLIPIZIDE		TdgClinicalTrial|TEND		Yes
GLICLAZIDE	GLICLAZIDE	Definite	KCNJ1	GLICLAZIDE		TdgClinicalTrial|TEND		Yes
GLIMEPIRIDE	GLIMEPIRIDE	Definite	KCNJ1	GLIMEPIRIDE	inhibitor	TdgClinicalTrial|TEND|DrugBank	12703060|17139284|17016423|12475777	Yes
ACETOHEXAMIDE	ACETOHEXAMIDE	Definite	KCNJ1	ACETOHEXAMIDE	inhibitor	TdgClinicalTrial|TEND|DrugBank	17139284|17016423	Yes
GLYMIDINE	GLYMIDINE	Definite	KCNJ1	GLYMIDINE		TdgClinicalTrial|TEND|DrugBank	16470247|16263802|17015627|20434356|134717|17139284|17016423	Yes
CHLORPROPAMIDE	CHLORPROPAMIDE	Definite	KCNJ10	CHLORPROPAMIDE	blocker	TTD		No
TOLAZAMIDE	TOLAZAMIDE	Definite	KCNJ10	TOLAZAMIDE	blocker	TTD		No
GLIPIZIDE	GLIPIZIDE	Definite	KCNJ10	GLIPIZIDE	blocker	TTD		No
GLIQUIDONE	GLIQUIDONE	Definite	KCNJ10	GLIQUIDONE	binder	TTD		No
GLISOXEPIDE	GLISOXEPIDE	Definite	KCNJ10	GLISOXEPIDE	blocker	TTD		No
ACETOHEXAMIDE	ACETOHEXAMIDE	Definite	KCNJ10	ACETOHEXAMIDE	binder	TTD		No
GLYMIDINE	GLYMIDINE	Definite	KCNJ10	GLYMIDINE	binder	TTD		No
NATEGLINIDE	NATEGLINIDE	Definite	KCNJ10	NATEGLINIDE	blocker	TTD		No
MITIGLINIDE	MITIGLINIDE	Definite	KCNJ10	MITIGLINIDE	blocker	TTD		No
CHLORPROPAMIDE	CHLORPROPAMIDE	Definite	KCNJ11	CHLORPROPAMIDE	blocker	ChemblInteractions		No
TOLAZAMIDE	TOLAZAMIDE	Definite	KCNJ11	TOLAZAMIDE	blocker	ChemblInteractions		No
GLIPIZIDE	GLIPIZIDE	Definite	KCNJ11	GLIPIZIDE	blocker	ChemblInteractions		No
ACETOHEXAMIDE	ACETOHEXAMIDE	Definite	KCNJ11	ACETOHEXAMIDE	blocker	ChemblInteractions		No
MITIGLINIDE	MITIGLINIDE	Definite	KCNJ11	MITIGLINIDE		TEND		No
TOLBUTAMIDE	TOLBUTAMIDE	Definite	KCNJ11	TOLBUTAMIDE	inhibitor|blocker	GuideToPharmacologyInteractions|ChemblInteractions		Yes
GLIMEPIRIDE	GLIMEPIRIDE	Definite	KCNJ11	GLIMEPIRIDE	inhibitor|blocker	TdgClinicalTrial|ChemblInteractions|NCI|TEND|DrugBank	12086984|12703060|11325810	Yes
REPAGLINIDE	REPAGLINIDE	Definite	KCNJ11	REPAGLINIDE	blocker	PharmGKB|ChemblInteractions|TEND		Yes
NATEGLINIDE	NATEGLINIDE	Definite	KCNJ11	NATEGLINIDE	blocker	ChemblInteractions|TEND		Yes
PHENFORMIN	PHENFORMIN	Definite	KCNJ8	PHENFORMIN	inhibitor	DrugBank	20188727	Yes
GLIQUIDONE	GLIQUIDONE	Definite	KCNJ8	GLIQUIDONE	inhibitor	DrugBank	9015372|16174795|12670661	Yes
GLISOXEPIDE	GLISOXEPIDE	Definite	KCNJ8	GLISOXEPIDE	inhibitor	DrugBank	9015372|16174795	Yes
PHENFORMIN	PHENFORMIN	Definite	KRAS	PHENFORMIN		CKB	26574479	Yes
METFORMIN	METFORMIN	Definite	KRAS	METFORMIN		CKB	24077915|23877793	Yes
TROGLITAZONE	TROGLITAZONE	Definite	LEP	TROGLITAZONE		NCI	10753628	Yes
ACARBOSE	ACARBOSE	Definite	LPL	ACARBOSE		NCI	8886823	Yes
ROSIGLITAZONE	ROSIGLITAZONE	Definite	MAP2K3	ROSIGLITAZONE		NCI	11591391	Yes
ACARBOSE	ACARBOSE	Definite	MGA	ACARBOSE	inhibitor	ChemblInteractions		No
MIGLITOL	MIGLITOL	Definite	MGA	MIGLITOL	inhibitor	ChemblInteractions		No
ACARBOSE	ACARBOSE	Definite	MGAM	ACARBOSE	inhibitor	TdgClinicalTrial|TEND|DrugBank|TTD	19275550|16359900|16702880|11752352|16763908	Yes
MIGLITOL	MIGLITOL	Definite	MGAM	MIGLITOL	antagonist|inhibitor	TdgClinicalTrial|GuideToPharmacologyInteractions|TEND|DrugBank|TTD	9951949|11752352|19818342|16817895	Yes
VOGLIBOSE	VOGLIBOSE	Definite	MGAM	VOGLIBOSE	inhibitor	TdgClinicalTrial|TEND|DrugBank|TTD	20351564|19568704|11752352|16713439|19281809|20025554	Yes
METFORMIN	METFORMIN	Definite	MTOR	METFORMIN	inhibitor	GuideToPharmacologyInteractions|MyCancerGenomeClinicalTrial		Yes
TROGLITAZONE	TROGLITAZONE	Definite	MYC	TROGLITAZONE		NCI	11344222	Yes
ROSIGLITAZONE	ROSIGLITAZONE	Definite	NFE2L2	ROSIGLITAZONE		NCI	18302760	Yes
ROSIGLITAZONE	ROSIGLITAZONE	Definite	NOS1	ROSIGLITAZONE		NCI	15130775	Yes
ROSIGLITAZONE	ROSIGLITAZONE	Definite	NPY	ROSIGLITAZONE		NCI	9421288	Yes
TROGLITAZONE	TROGLITAZONE	Definite	NR1I2	TROGLITAZONE		PharmGKB		No
PIOGLITAZONE	PIOGLITAZONE	Definite	NR1I2	PIOGLITAZONE		PharmGKB		No
METFORMIN	METFORMIN	Definite	NRAS	METFORMIN		CIViC	25504439	Yes
METFORMIN	METFORMIN	Definite	PIK3CA	METFORMIN		CKB	23986086	Yes
TROGLITAZONE	TROGLITAZONE	Definite	PIK3CB	TROGLITAZONE		NCI	11553036	Yes
TROGLITAZONE	TROGLITAZONE	Definite	PIK3CG	TROGLITAZONE		NCI	15993751	Yes
ROSIGLITAZONE	ROSIGLITAZONE	Definite	PIK3CG	ROSIGLITAZONE		NCI	16777975	Yes
PIOGLITAZONE	PIOGLITAZONE	Definite	PPARA	PIOGLITAZONE		TTD		No
GLIPIZIDE	GLIPIZIDE	Definite	PPARG	GLIPIZIDE	agonist	DrugBank	17082235	Yes
TROGLITAZONE	TROGLITAZONE	Definite	PPARG	TROGLITAZONE	agonist	GuideToPharmacologyInteractions|ChemblInteractions|DrugBank|TTD	10076568|10222233|10200320|12475986|10097144|11752352|10214942	Yes
ROSIGLITAZONE	ROSIGLITAZONE	Definite	PPARG	ROSIGLITAZONE	agonist	TdgClinicalTrial|GuideToPharmacologyInteractions|TEND|DrugBank|TTD	10475242|10764590|10871190|10707565|11752352|10548525	Yes
PIOGLITAZONE	PIOGLITAZONE	Definite	PPARG	PIOGLITAZONE	agonist	TdgClinicalTrial|GuideToPharmacologyInteractions|TEND|DrugBank|TTD	7768881|15356026|8576907|9568680|11752352|20018750	Yes
REPAGLINIDE	REPAGLINIDE	Definite	PPARG	REPAGLINIDE	agonist	DrugBank	17082235	Yes
NATEGLINIDE	NATEGLINIDE	Definite	PPARG	NATEGLINIDE	agonist	DrugBank	17082235	Yes
MITIGLINIDE	MITIGLINIDE	Definite	PPARG	MITIGLINIDE	agonist	DrugBank	17082235	Yes
PHENFORMIN	PHENFORMIN	Definite	PRKAA1	PHENFORMIN	activator	TdgClinicalTrial|TEND|DrugBank	17369473|17995453|17603555	Yes
METFORMIN	METFORMIN	Definite	PRKAB1	METFORMIN		TdgClinicalTrial|TEND		Yes
METFORMIN	METFORMIN	Definite	PTEN	METFORMIN		CKB	26921394|24077915	Yes
PRAMLINTIDE	PRAMLINTIDE	Definite	RAMP1	PRAMLINTIDE	agonist	TdgClinicalTrial|TEND|DrugBank	15494035|18593822|11772274|20357016|20015292|17139284|19273748|17016423	Yes
PRAMLINTIDE	PRAMLINTIDE	Definite	RAMP2	PRAMLINTIDE	agonist	TdgClinicalTrial|TEND|DrugBank	15494035|18593822|20015292|17139284|19273748|17016423	Yes
PRAMLINTIDE	PRAMLINTIDE	Definite	RAMP3	PRAMLINTIDE	agonist	TdgClinicalTrial|GuideToPharmacologyInteractions|TEND|DrugBank	15494035|18593822|11772274|20357016|20015292|17139284|19273748|17016423	Yes
ROSIGLITAZONE	ROSIGLITAZONE	Definite	RBP4	ROSIGLITAZONE		NCI	16034410	Yes
ROSIGLITAZONE	ROSIGLITAZONE	Definite	SCD	ROSIGLITAZONE		NCI	15855323	Yes
TROGLITAZONE	TROGLITAZONE	Definite	SERPINE1	TROGLITAZONE	antagonist	DrugBank	10871202|10418858|10770198|10831180|10768100	Yes
ACARBOSE	ACARBOSE	Definite	SI	ACARBOSE	inhibitor	TdgClinicalTrial|TEND|DrugBank	16169004|15322845|12864906|6226260|2962844	Yes
TROGLITAZONE	TROGLITAZONE	Definite	SLC29A1	TROGLITAZONE	inhibitor	DrugBank	15963471	Yes
ROSIGLITAZONE	ROSIGLITAZONE	Definite	SLC2A1	ROSIGLITAZONE		NCI	11699047	Yes
PIOGLITAZONE	PIOGLITAZONE	Definite	SLC2A1	PIOGLITAZONE		NCI	17251278	Yes
GLIPIZIDE	GLIPIZIDE	Definite	SLC2A4	GLIPIZIDE		NCI	8043894	Yes
ACARBOSE	ACARBOSE	Definite	SLC2A4	ACARBOSE		NCI	12065205	Yes
TROGLITAZONE	TROGLITAZONE	Definite	SLC2A4	TROGLITAZONE		NCI	11947963	Yes
REPAGLINIDE	REPAGLINIDE	Definite	SLC30A8	REPAGLINIDE		PharmGKB		No
METFORMIN	METFORMIN	Definite	SLC47A1	METFORMIN		GuideToPharmacologyInteractions		No
DAPAGLIFLOZIN	DAPAGLIFLOZIN	Definite	SLC5A1	DAPAGLIFLOZIN	inhibitor	GuideToPharmacologyInteractions		No
EMPAGLIFLOZIN	EMPAGLIFLOZIN	Definite	SLC5A1	EMPAGLIFLOZIN	inhibitor	GuideToPharmacologyInteractions		No
ERTUGLIFLOZIN	ERTUGLIFLOZIN	Definite	SLC5A1	ERTUGLIFLOZIN	inhibitor	GuideToPharmacologyInteractions		No
IPRAGLIFLOZIN	CHEMBL2018096	Definite	SLC5A1	CHEMBL2018096	inhibitor	GuideToPharmacologyInteractions		No
CANAGLIFLOZIN	CANAGLIFLOZIN	Definite	SLC5A1	CANAGLIFLOZIN	inhibitor	GuideToPharmacologyInteractions|DrugBank	23590413	Yes
SOTAGLIFLOZIN	SOTAGLIFLOZIN	Definite	SLC5A1	SOTAGLIFLOZIN	inhibitor	TdgClinicalTrial|GuideToPharmacologyInteractions|ChemblInteractions		Yes
DAPAGLIFLOZIN	DAPAGLIFLOZIN	Definite	SLC5A2	DAPAGLIFLOZIN	antagonist|inhibitor, competitive|inhibitor|blocker	TdgClinicalTrial|GuideToPharmacologyInteractions|DrugBank|TTD	19996149	Yes
CANAGLIFLOZIN	CANAGLIFLOZIN	Definite	SLC5A2	CANAGLIFLOZIN	inhibitor|blocker	TdgClinicalTrial|GuideToPharmacologyInteractions|DrugBank|TTD	23590413	Yes
EMPAGLIFLOZIN	EMPAGLIFLOZIN	Definite	SLC5A2	EMPAGLIFLOZIN	antagonist|inhibitor	TdgClinicalTrial|GuideToPharmacologyInteractions|ChemblInteractions|DrugBank	25598831	Yes
ERTUGLIFLOZIN	ERTUGLIFLOZIN	Definite	SLC5A2	ERTUGLIFLOZIN	inhibitor	GuideToPharmacologyInteractions|ChemblInteractions		Yes
IPRAGLIFLOZIN	CHEMBL2018096	Definite	SLC5A2	CHEMBL2018096	inhibitor	TdgClinicalTrial|GuideToPharmacologyInteractions		Yes
SOTAGLIFLOZIN	SOTAGLIFLOZIN	Definite	SLC5A2	SOTAGLIFLOZIN	inhibitor	TdgClinicalTrial|GuideToPharmacologyInteractions|ChemblInteractions		Yes
REPAGLINIDE	REPAGLINIDE	Definite	SLCO1B1	REPAGLINIDE		PharmGKB		No
TROGLITAZONE	TROGLITAZONE	Definite	SLCO1B1	TROGLITAZONE		PharmGKB|NCI	14977862	Yes
ROSIGLITAZONE	ROSIGLITAZONE	Definite	SLCO2B1	ROSIGLITAZONE		NCI	18314419	Yes
PHENFORMIN	PHENFORMIN	Definite	STK11	PHENFORMIN		CKB|CGI	26574479	Yes
METFORMIN	METFORMIN	Definite	STK11	METFORMIN		CKB	17062558|18006825	Yes
PRAMLINTIDE	PRAMLINTIDE	Definite	TAP2	PRAMLINTIDE	agonist	GuideToPharmacologyInteractions		No
REPAGLINIDE	REPAGLINIDE	Definite	TCF7L2	REPAGLINIDE		PharmGKB		No
ROSIGLITAZONE	ROSIGLITAZONE	Definite	TG	ROSIGLITAZONE		NCI	15640776|16921272	Yes
PIOGLITAZONE	PIOGLITAZONE	Definite	TGFB1	PIOGLITAZONE		NCI	17407709	Yes
PIOGLITAZONE	PIOGLITAZONE	Definite	THBS1	PIOGLITAZONE		NCI	17063547	Yes
ACETOHEXAMIDE	ACETOHEXAMIDE	Definite	TLR7	ACETOHEXAMIDE	agonist	GuideToPharmacologyInteractions		No
GLIMEPIRIDE	GLIMEPIRIDE	Definite	TNF	GLIMEPIRIDE		NCI	14686960	Yes
PRAMLINTIDE	PRAMLINTIDE	Definite	TP53	PRAMLINTIDE		CGI		No
ROSIGLITAZONE	ROSIGLITAZONE	Definite	TRPC5	ROSIGLITAZONE	activator	GuideToPharmacologyInteractions		No
TROGLITAZONE	TROGLITAZONE	Definite	TRPM3	TROGLITAZONE	channel blocker	GuideToPharmacologyInteractions		No
ROSIGLITAZONE	ROSIGLITAZONE	Definite	TRPM3	ROSIGLITAZONE	channel blocker	GuideToPharmacologyInteractions		No
PIOGLITAZONE	PIOGLITAZONE	Definite	TRPM3	PIOGLITAZONE	channel blocker	GuideToPharmacologyInteractions		No
ROSIGLITAZONE	ROSIGLITAZONE	Definite	UCP2	ROSIGLITAZONE		NCI	9299560	Yes
TROGLITAZONE	TROGLITAZONE	Definite	UGT1A10	TROGLITAZONE		NCI	12433820	Yes
TROGLITAZONE	TROGLITAZONE	Definite	VCAM1	TROGLITAZONE		NCI	10626906	Yes
GLICLAZIDE	GLICLAZIDE	Definite	VEGFA	GLICLAZIDE		DrugBank	17602961|14746574|17046555|12126787	Yes
TROGLITAZONE	TROGLITAZONE	Definite	XIAP	TROGLITAZONE		NCI	15498850	Yes
