# Supplementary material for: Genetic association and causal inference converge on hyperglycaemia as a modifiable factor to improve lung function
Source: eLife journal article supplement (doi:10.7554/elife.63115), 2021-03-15
Supplement: supp [file elife_poa_e63115_Figure_1_figure_supplement_1.docx]

**Figure 1 – figure supplement 1. Diagrammatic overview of strategies for genetically informed drug repurposing to improve lung function.** The left column outlines our workflow for using causal inference to identify drug targets, while the right side shows the workflow for functionally partitioning the heritable component into drug targets. In both cases we utilize or integrate GWAS data for lung function (including three spirometry phenotypes: forced expiratory volume in one second (FEV1), forced vital capacity (FVC), and their ratio (FEV1/FVC)) and quantitative biochemical traits (e.g. hormones and metabolites) which can be pharmacologically modulated.Using this data, we established genetic correlation between lung function and the biochemical traits using LD score regression (LDSC) (left column). We then constructed a latent causal variable (LCV) model to investigate evidence of causality for significantly correlated biochemical-lung function trait pairs. To further support causal inference between significant pairs we implemented Mendelian randomisation. Where a causal relationship between a modifiable biochemical trait and lung function is established, we can infer a novel treatment. The right column shows the workflow for utilising the *pharmagenic enrichment score* (PES) framework for precision drug repositioning. Specifically, polygenic scores for lung function were calculated using lung function GWAS SNPs within biological pathways that can be targeted by approved drugs, rather than a genome-wide score. Individuals with low genetically predicted lung function by a PES (low PES) relative to a reference population (orange shaded distribution in right panel 3) may benefit from a compound which modulates said pathway. To further support putative genetically predicted targets for drug repositioning a transcriptome-wide association study (TWAS) of lung function was performed. Druggable genes for which genetically predicted expression was correlated with a spirometry measure. Genes with positive genetic covariance between imputed expression and lung function (i.e. increased expression associated with increased lung function) could be modulated by an agonist compound, whilst genes for which decreased predicted expression is associated with improved lung function could be targeted by an antagonist compound.
